# Supplementary material for: A comprehensive survey of C. elegans argonaute proteins reveals organism-wide gene regulatory networks and functions
Source: eLife. 2023 Feb 15;12:e83853. doi: 10.7554/eLife.83853 (PMC10101689; doi:10.7554/eLife.83853)
Supplement: Supplementary file 4. [file elife-83853-supp4.xlsx]

## Sheet: Depleted sRNAs and targets
A summary of sRNA species (e.g. miR, piRNA) and targets (e.g. WBGene, etc.) depleted more than two fold in ago mutants.
argonaute	gene	biotype	baseMean	log2FoldChange	lfcSE	stat	pvalue	padj
ALG-1	cel-miR-229-5p	miRNA	5525.23	-2.66611	0.0498198	-53.515	0	0
ALG-1	cel-miR-235-3p	miRNA	9796.14	-2.24062	0.043816	-51.1369	0	0
ALG-1	cel-miR-44-3p	miRNA	44194.8	-1.34318	0.0346413	-38.7739	0	0
ALG-1	cel-miR-45-3p	miRNA	44194.8	-1.34318	0.0346413	-38.7739	0	0
ALG-1	cel-miR-46-3p	miRNA	21483.8	-2.11714	0.0425291	-49.7808	0	0
ALG-1	cel-miR-47-3p	miRNA	25429.8	-1.77349	0.0424712	-41.7575	0	0
ALG-1	cel-miR-50-5p	miRNA	20928.7	-2.55052	0.0336154	-75.8734	0	0
ALG-1	cel-miR-55-3p	miRNA	54922.1	-1.81339	0.0336381	-53.9087	0	0
ALG-1	cel-miR-56-3p	miRNA	44421.9	-1.8499	0.0324224	-57.0561	0	0
ALG-1	cel-miR-63-3p	miRNA	4668.48	-2.44129	0.0443733	-55.0171	0	0
ALG-1	cel-miR-64-5p	miRNA	41471.8	-3.20775	0.0384109	-83.5116	0	0
ALG-1	cel-miR-66-5p	miRNA	50284.7	-1.75006	0.0376522	-46.4796	0	0
ALG-1	cel-miR-70-3p	miRNA	165893	-2.30118	0.0338001	-68.0822	0	0
ALG-1	cel-miR-73-3p	miRNA	15893.5	-2.07721	0.0430087	-48.2976	0	0
ALG-1	cel-miR-785-3p	miRNA	1008.53	-3.74979	0.0934036	-40.1461	0	0
ALG-1	cel-miR-81-3p	miRNA	29013.1	-2.19156	0.0413102	-53.0513	0	0
ALG-1	cel-miR-82-3p	miRNA	99285.7	-2.01228	0.0318455	-63.1888	0	0
ALG-1	cel-miR-84-5p	miRNA	21282.1	-1.27	0.0316349	-40.1455	0	0
ALG-1	cel-miR-85-3p	miRNA	25614.2	-1.43025	0.0334292	-42.7844	0	0
ALG-1	CER16-1-LTR_CE	dfam_repeats_AS	3349.24	-2.15782	0.0480772	-44.8824	0	0
ALG-1	Turmoil2	dfam_repeats_AS	6873.4	-4.69119	0.0517467	-90.6569	0	0
ALG-1	WBGene00000685	protein_coding_AS	3463.54	-1.7291	0.0439218	-39.3677	0	0
ALG-1	WBGene00001854	protein_coding_AS	4521.89	-1.43346	0.0381345	-37.5897	0	0
ALG-1	WBGene00002263	protein_coding_AS	2155.04	2.98382	0.0570349	52.3157	0	0
ALG-1	WBGene00003579	protein_coding_AS	1626.89	-3.50098	0.0727337	-48.1343	0	0
ALG-1	WBGene00003884	protein_coding_AS	6231.39	-4.19573	0.0474449	-88.4339	0	0
ALG-1	WBGene00007275	protein_coding_AS	1318.99	2.40565	0.063043	38.1589	0	0
ALG-1	WBGene00007454	protein_coding_AS	3610.47	-5.53204	0.0820505	-67.4224	0	0
ALG-1	WBGene00007717	protein_coding_AS	746.383	3.98571	0.105121	37.9155	0	0
ALG-1	WBGene00007779	protein_coding_AS	1693.74	-4.09474	0.0788673	-51.9194	0	0
ALG-1	WBGene00008010	protein_coding_AS	14317.3	-2.00939	0.0322914	-62.2269	0	0
ALG-1	WBGene00008862	protein_coding_AS	39980.6	-1.45956	0.0284307	-51.3374	0	0
ALG-1	WBGene00008863	protein_coding_AS	7324.03	-2.94107	0.0394038	-74.6393	0	0
ALG-1	WBGene00011059	protein_coding_AS	3333.8	-4.6949	0.0679789	-69.0642	0	0
ALG-1	WBGene00011200	protein_coding_AS	1041.77	2.9686	0.0756817	39.2247	0	0
ALG-1	WBGene00011964	protein_coding_AS	13241.7	-4.8003	0.0449142	-106.877	0	0
ALG-1	WBGene00012548	protein_coding_AS	7700.34	-1.5467	0.0357201	-43.3005	0	0
ALG-1	WBGene00013036	protein_coding_AS	8629.38	-1.38915	0.033481	-41.4906	0	0
ALG-1	WBGene00013180	protein_coding_AS	1302.62	-2.93109	0.0758846	-38.6256	0	0
ALG-1	WBGene00013830	protein_coding_AS	1912.39	2.56738	0.0567151	45.268	0	0
ALG-1	WBGene00014955	pseudogene_AS	1135.7	-4.25761	0.0990157	-42.9993	0	0
ALG-1	WBGene00014977	pseudogene_AS	6151.37	-1.96578	0.0356584	-55.128	0	0
ALG-1	WBGene00015096	protein_coding_AS	1148.73	-4.06445	0.0977024	-41.6003	0	0
ALG-1	WBGene00016273	protein_coding_AS	2659.43	-2.58825	0.0503516	-51.4035	0	0
ALG-1	WBGene00016565	protein_coding_AS	7809.97	-1.4067	0.0352965	-39.8537	0	0
ALG-1	WBGene00017185	protein_coding_AS	2413.99	-2.94192	0.0577735	-50.9217	0	0
ALG-1	WBGene00018772	protein_coding_AS	2995.59	-2.02179	0.0468437	-43.1605	0	0
ALG-1	WBGene00021055	pseudogene_AS	2284.01	-2.17828	0.0539317	-40.3895	0	0
ALG-1	WBGene00021106	protein_coding_AS	2413.99	-2.94192	0.0577735	-50.9217	0	0
ALG-1	WBGene00021349	protein_coding_AS	1344.13	3.95047	0.0790365	49.9828	0	0
ALG-1	WBGene00021416	protein_coding_AS	1056.02	-3.13979	0.0821522	-38.2191	0	0
ALG-1	WBGene00021430	protein_coding_AS	2546.42	-2.83054	0.0538007	-52.6115	0	0
ALG-1	WBGene00022131	protein_coding_AS	962.14	-3.41921	0.0895096	-38.1993	0	0
ALG-1	WBGene00022608	protein_coding_AS	1530.59	-3.09886	0.0745404	-41.5729	0	0
ALG-1	WBGene00023284	protein_coding_AS	9730.24	-1.66286	0.0325829	-51.0348	0	0
ALG-1	WBGene00044213	protein_coding_AS	4123.69	-4.69658	0.0613837	-76.5119	0	0
ALG-1	WBGene00044502	protein_coding_AS	3766.87	-2.59767	0.0474358	-54.7618	0	0
ALG-1	WBGene00044637	protein_coding_AS	1175.43	3.03786	0.0760239	39.9593	0	0
ALG-1	WBGene00189951	lincRNA_AS	62428	-1.26563	0.0298837	-42.3521	0	0
ALG-1	WBGene00235090	ncRNA_AS	1485.23	-2.70774	0.0669238	-40.46	0	0
ALG-1	WBGene00304219	ncRNA_AS	1329.72	-3.93703	0.0864	-45.5675	0	0
ALG-1	WBGene00019575	pseudogene_AS	3295.47	-1.61409	0.0432861	-37.2889	2.48e-304	8.09e-302
ALG-1	WBGene00220084	ncRNA_AS	1287.54	-2.62896	0.0705506	-37.2635	6.41e-304	2.06e-301
ALG-1	WBGene00012237	protein_coding_AS	1966.02	-2.06448	0.0555706	-37.1506	4.29e-302	1.36e-299
ALG-1	WBGene00006750	protein_coding_AS	1273.39	-2.84905	0.076716	-37.1376	6.95e-302	2.16e-299
ALG-1	WBGene00077636	pseudogene_AS	5314.77	-1.363	0.0368485	-36.9893	1.7e-299	5.21e-297
ALG-1	WBGene00008086	protein_coding_AS	4584.94	-1.68168	0.0460033	-36.5555	1.46e-292	4.4e-290
ALG-1	WBGene00011252	protein_coding_AS	651.073	4.58672	0.125501	36.5474	1.96e-292	5.83e-290
ALG-1	WBGene00013189	protein_coding_AS	5408.34	-1.40855	0.0389386	-36.1735	1.59e-286	4.66e-284
ALG-1	WBGene00001008	protein_coding_AS	5472.56	-1.49677	0.0415066	-36.061	9.29e-285	2.68e-282
ALG-1	WBGene00008132	protein_coding_AS	1519.24	-2.39301	0.066397	-36.041	1.91e-284	5.43e-282
ALG-1	WBGene00045238	ncRNA_AS	1727.35	2.10422	0.0584085	36.0259	3.29e-284	9.24e-282
ALG-1	WBGene00022438	protein_coding_AS	1781.9	-2.58461	0.0720869	-35.8541	1.59e-281	4.4e-279
ALG-1	WBGene00000819	protein_coding_AS	6199.77	-1.39233	0.039016	-35.6862	6.46e-279	1.77e-276
ALG-1	cel-miR-36-3p	miRNA	6334.31	-1.58244	0.0451609	-35.04	5.53e-269	1.49e-266
ALG-1	WBGene00015849	protein_coding_AS	3115.54	-1.54028	0.0440591	-34.9594	9.33e-268	2.48e-265
ALG-1	cel-miR-238-3p	miRNA	24161.4	-1.3701	0.0395124	-34.6752	1.86e-263	4.9e-261
ALG-1	WBGene00017571	protein_coding_AS	4387.21	-1.55098	0.0450903	-34.3971	2.78e-259	7.22e-257
ALG-1	cel-lin-4-5p	miRNA	8159.57	-1.44012	0.0420157	-34.2758	1.8e-257	4.61e-255
ALG-1	WBGene00007093	protein_coding_AS	6541.88	-1.30904	0.0382678	-34.2073	1.88e-256	4.75e-254
ALG-1	WBGene00017423	protein_coding_AS	2683.57	-1.92187	0.0563282	-34.1192	3.83e-255	9.57e-253
ALG-1	WBGene00013499	protein_coding_AS	733.214	-3.56811	0.105181	-33.9234	3.01e-252	7.43e-250
ALG-1	WBGene00001859	protein_coding_AS	23829.1	-0.902318	0.0266075	-33.9122	4.4e-252	1.07e-249
ALG-1	WBGene00194678	ncRNA_AS	1990.14	-1.84938	0.0546227	-33.8574	2.83e-251	6.8e-249
ALG-1	WBGene00007675	protein_coding_AS	2862	-1.61599	0.0477549	-33.8393	5.22e-251	1.24e-248
ALG-1	cel-miR-54-3p	miRNA	7995.06	-1.19636	0.0358687	-33.3539	6.39e-244	1.5e-241
ALG-1	WBGene00011139	protein_coding_AS	1041.29	2.40279	0.072246	33.2584	1.54e-242	3.58e-240
ALG-1	Tc1	dfam_repeats_AS	33814.6	-0.880599	0.0264934	-33.2384	3e-242	6.9e-240
ALG-1	cel-miR-246-3p	miRNA	9923.57	-1.17334	0.0353108	-33.229	4.1e-242	9.33e-240
ALG-1	cel-miR-63-5p	miRNA	1161	-2.56255	0.0771574	-33.212	7.23e-242	1.62e-239
ALG-1	WBGene00007455	protein_coding_AS	516.427	4.71798	0.142478	33.1137	1.89e-240	4.19e-238
ALG-1	WBGene00021931	protein_coding_AS	5068.18	-1.23433	0.0373478	-33.0496	1.57e-239	3.46e-237
ALG-1	WBGene00022306	protein_coding_AS	2864.38	-1.50715	0.0456102	-33.0441	1.89e-239	4.11e-237
ALG-1	WBGene00021927	protein_coding_AS	1750.6	-1.95745	0.0593498	-32.9816	1.49e-238	3.2e-236
ALG-1	cel-miR-228-5p	miRNA	30433.3	-1.02471	0.0311876	-32.8562	9.3e-237	1.98e-234
ALG-1	WBGene00018990	protein_coding_AS	2248.23	-1.69508	0.0515954	-32.8533	1.02e-236	2.15e-234
ALG-1	WBGene00016871	protein_coding_AS	1343.88	-2.56396	0.078062	-32.8452	1.34e-236	2.78e-234
ALG-1	cel-miR-87-3p	miRNA	2959.95	-1.60438	0.048857	-32.8383	1.67e-236	3.45e-234
ALG-1	WBGene00189952	protein_coding_AS	1491.27	-1.97163	0.0601461	-32.7807	1.11e-235	2.27e-233
ALG-1	WBGene00019816	protein_coding_AS	1406.41	-2.17431	0.0663405	-32.775	1.34e-235	2.7e-233
ALG-1	WBGene00013226	protein_coding_AS	3983.56	-1.36865	0.0420614	-32.5394	2.96e-232	5.92e-230
ALG-1	WBGene00044258	protein_coding_AS	8281.75	-1.26549	0.0389591	-32.4826	1.88e-231	3.73e-229
ALG-1	WBGene00022446	protein_coding_AS	1425.84	-2.30937	0.0712505	-32.412	1.86e-230	3.65e-228
ALG-1	cel-miR-40-3p	miRNA	6599.97	-1.66362	0.0513508	-32.3971	3.02e-230	5.87e-228
ALG-1	WBGene00019538	protein_coding_AS	638.864	-4.72462	0.146985	-32.1436	1.09e-226	2.09e-224
ALG-1	cel-miR-86-5p	miRNA	6146.53	-1.42111	0.0443138	-32.0692	1.19e-225	2.26e-223
ALG-1	WBGene00002220	protein_coding_AS	3143.59	1.49833	0.0468972	31.9491	5.55e-224	1.05e-221
ALG-1	WBGene00022564	protein_coding_AS	1062.46	-2.31011	0.0729435	-31.6699	4.03e-220	7.55e-218
ALG-1	WBGene00012909	protein_coding_AS	604.119	-3.93257	0.125464	-31.3442	1.17e-215	2.16e-213
ALG-1	cel-miR-49-3p	miRNA	2938.77	-1.45791	0.0465269	-31.3347	1.57e-215	2.89e-213
ALG-1	WBGene00021547	protein_coding_AS	611.643	-3.48888	0.111573	-31.2699	1.2e-214	2.18e-212
ALG-1	WBGene00020988	protein_coding_AS	3916.19	-1.63108	0.0521767	-31.2608	1.59e-214	2.88e-212
ALG-1	WBGene00045311	pseudogene_AS	2100	-1.70319	0.0547234	-31.1236	1.16e-212	2.07e-210
ALG-1	cel-miR-65-5p	miRNA	43446.1	-2.71236	0.0872358	-31.0923	3.06e-212	5.43e-210
ALG-1	WBGene00009901	protein_coding_AS	2028.91	-1.75938	0.0566908	-31.0347	1.83e-211	3.23e-209
ALG-1	WBGene00000615	protein_coding_AS	614.631	-3.38228	0.109175	-30.9803	9.93e-211	1.73e-208
ALG-1	WBGene00014907	pseudogene_AS	2980.42	-1.37151	0.0446106	-30.7441	1.47e-207	2.53e-205
ALG-1	CER9-LTR_CE	dfam_repeats_AS	13042.3	-0.909942	0.0296299	-30.7103	4.15e-207	7.11e-205
ALG-1	WBGene00017069	protein_coding_AS	12463.5	-1.07335	0.0349761	-30.6882	8.18e-207	1.39e-204
ALG-1	WBGene00022519	protein_coding_AS	585.248	-3.68978	0.120774	-30.5511	5.47e-205	9.21e-203
ALG-1	WBGene00009788	pseudogene_AS	7899.73	-1.36602	0.0447191	-30.5467	6.26e-205	1.05e-202
ALG-1	Chapaev-2_CE	dfam_repeats_AS	31530.2	-0.848889	0.0278118	-30.5226	1.31e-204	2.17e-202
ALG-1	WBGene00006570	protein_coding_AS	692.168	-2.85219	0.0937045	-30.4381	1.72e-203	2.83e-201
ALG-1	WBGene00013163	protein_coding_AS	6262.78	-1.09164	0.035884	-30.4214	2.86e-203	4.67e-201
ALG-1	cel-miR-72-5p	miRNA	72246.5	-0.938317	0.0311731	-30.1003	4.81e-199	7.78e-197
ALG-1	WBGene00018223	protein_coding_AS	6976.06	-1.00416	0.0333887	-30.075	1.03e-198	1.65e-196
ALG-1	cel-miR-60-3p	miRNA	5988.33	-1.23735	0.041276	-29.9775	1.93e-197	3.07e-195
ALG-1	WBGene00003614	protein_coding_AS	25692.3	-0.944666	0.0315551	-29.937	6.5e-197	1.03e-194
ALG-1	WBGene00021483	pseudogene_AS	2055.27	-1.64207	0.0559309	-29.359	1.83e-189	2.88e-187
ALG-1	WBGene00219413	protein_coding_AS	1703.08	-1.73865	0.059246	-29.3463	2.66e-189	4.14e-187
ALG-1	WBGene00011499	protein_coding_AS	905.409	-2.40436	0.0819393	-29.3432	2.92e-189	4.51e-187
ALG-1	WBGene00007303	protein_coding_AS	24455.8	-0.871112	0.0298957	-29.1384	1.17e-186	1.8e-184
ALG-1	WBGene00007982	protein_coding_AS	5943.98	-1.03404	0.0354968	-29.1305	1.48e-186	2.25e-184
ALG-1	WBGene00012792	protein_coding_AS	2378.81	-1.61477	0.0555632	-29.0619	1.09e-185	1.64e-183
ALG-1	WBGene00003915	protein_coding_AS	6309.27	-1.01493	0.0350846	-28.9282	5.28e-184	7.91e-182
ALG-1	WBGene00012993	protein_coding_AS	1544.18	-1.62717	0.0566274	-28.7346	1.41e-181	2.1e-179
ALG-1	WBGene00020666	protein_coding_AS	6661.83	-1.12829	0.0392681	-28.733	1.48e-181	2.18e-179
ALG-1	cel-miR-48-5p	miRNA	101682	-0.844629	0.0293983	-28.7305	1.59e-181	2.33e-179
ALG-1	cel-miR-252-5p	miRNA	1038.44	-2.01721	0.070678	-28.5409	3.64e-179	5.3e-177
ALG-1	cel-miR-71-5p	miRNA	129198	-1.14249	0.0400834	-28.5029	1.08e-178	1.56e-176
ALG-1	WBGene00194681	ncRNA_AS	4683.19	1.09557	0.0385184	28.4429	5.97e-178	8.56e-176
ALG-1	WBGene00001955	protein_coding_AS	1429.5	-1.96539	0.0691164	-28.436	7.26e-178	1.03e-175
ALG-1	WBGene00006513	protein_coding_AS	1213.17	-1.86475	0.0659537	-28.2736	7.31e-176	1.03e-173
ALG-1	WBGene00022512	protein_coding_AS	3980.74	-1.34401	0.0476601	-28.1999	5.87e-175	8.24e-173
ALG-1	WBGene00004057	protein_coding_AS	3114.09	-1.27876	0.0453599	-28.1914	7.45e-175	1.04e-172
ALG-1	cel-let-7-5p	miRNA	62412.4	-1.04327	0.0371487	-28.0837	1.55e-173	2.15e-171
ALG-1	WBGene00010769	protein_coding_AS	507.898	-3.40676	0.121436	-28.0539	3.58e-173	4.93e-171
ALG-1	cel-miR-90-3p	miRNA	81788.8	-1.15003	0.0412089	-27.9073	2.18e-171	2.97e-169
ALG-1	cel-miR-79-3p	miRNA	1756.06	-2.08945	0.074903	-27.8954	3.03e-171	4.12e-169
ALG-1	WBGene00008009	protein_coding_AS	492.355	2.98539	0.107759	27.7044	6.18e-169	8.34e-167
ALG-1	WBGene00012898	pseudogene_AS	12859.9	-0.802777	0.0290623	-27.6226	5.96e-168	7.98e-166
ALG-1	WBGene00020164	pseudogene_AS	5481.37	-1.15934	0.0419768	-27.6186	6.65e-168	8.85e-166
ALG-1	WBGene00022020	protein_coding_AS	1910.91	-1.4807	0.0536257	-27.6117	8.05e-168	1.06e-165
ALG-1	CER13-I_CE	dfam_repeats_AS	1066.84	1.88446	0.0684383	27.5352	6.66e-167	8.75e-165
ALG-1	cel-miR-236-3p	miRNA	1088.09	-2.27778	0.0829254	-27.4678	4.26e-166	5.56e-164
ALG-1	WBGene00304813	ncRNA_AS	2812.39	-1.22881	0.0449072	-27.3633	7.49e-165	9.71e-163
ALG-1	WBGene00004120	protein_coding_AS	2213.71	1.37122	0.0502742	27.2748	8.43e-164	1.09e-161
ALG-1	WBGene00007489	protein_coding_AS	806.391	2.06609	0.0757805	27.2642	1.13e-163	1.44e-161
ALG-1	WBGene00013672	protein_coding_AS	1100.8	-1.99103	0.0730657	-27.2498	1.67e-163	2.12e-161
ALG-1	cel-miR-52-5p	miRNA	114333	-0.964151	0.0355601	-27.1133	6.86e-162	8.67e-160
ALG-1	CER16-2-LTR_CE	dfam_repeats_AS	1253.31	-1.74573	0.0646771	-26.9915	1.86e-160	2.33e-158
ALG-1	Turmoil1	dfam_repeats_AS	15339.6	-0.908759	0.0338547	-26.8429	1.02e-158	1.27e-156
ALG-1	WBGene00013620	protein_coding_AS	1613.02	-1.68959	0.0633826	-26.6571	1.48e-156	1.84e-154
ALG-1	CER3-1-LTR_CE	dfam_repeats_AS	3268.33	-1.16031	0.0436282	-26.5953	7.69e-156	9.49e-154
ALG-1	CER12-1-LTR_CE	dfam_repeats_AS	2708.73	-1.23332	0.0465972	-26.4676	2.29e-154	2.81e-152
ALG-1	WBGene00011803	protein_coding_AS	528.864	-2.95381	0.111696	-26.4451	4.15e-154	5.06e-152
ALG-1	WBGene00045297	protein_coding_AS	13010.2	-0.819867	0.0310696	-26.3881	1.88e-153	2.27e-151
ALG-1	(TAAGGATC)n	dfam_repeats_AS	574.847	2.84445	0.107886	26.3653	3.42e-153	4.12e-151
ALG-1	WBGene00002088	protein_coding_AS	1100.76	-1.7944	0.0680839	-26.3557	4.41e-153	5.28e-151
ALG-1	WBGene00009310	pseudogene_AS	15734.2	-0.912321	0.034668	-26.3159	1.26e-152	1.5e-150
ALG-1	WBGene00045272	protein_coding_AS	9315.08	-0.840275	0.0321639	-26.1248	1.91e-150	2.25e-148
ALG-1	WBGene00010012	protein_coding_AS	3736.95	-1.10354	0.0422714	-26.106	3.11e-150	3.66e-148
ALG-1	WBGene00022698	protein_coding_AS	342.515	3.7732	0.144611	26.0921	4.49e-150	5.24e-148
ALG-1	WBGene00000857	protein_coding_AS	444.807	-3.22303	0.123829	-26.0281	2.38e-149	2.77e-147
ALG-1	WBGene00016299	protein_coding_AS	4112.35	-1.12783	0.043346	-26.0193	2.99e-149	3.46e-147
ALG-1	WBGene00009380	protein_coding_AS	721.27	-2.28386	0.0882385	-25.8828	1.04e-147	1.19e-145
ALG-1	WBGene00007376	pseudogene_AS	17877.5	-0.815878	0.0315305	-25.8758	1.25e-147	1.42e-145
ALG-1	WBGene00255736	ncRNA_AS	9056.93	-0.926607	0.0358134	-25.8732	1.33e-147	1.52e-145
ALG-1	cel-miR-51-5p	miRNA	71308.2	-0.737718	0.0285433	-25.8456	2.73e-147	3.08e-145
ALG-1	WBGene00001119	protein_coding_AS	503.851	-2.95831	0.114867	-25.7541	2.9e-146	3.25e-144
ALG-1	WBGene00008726	protein_coding_AS	429.669	-3.23718	0.126508	-25.5888	2.04e-144	2.27e-142
ALG-1	WBGene00013563	protein_coding_AS	1108.11	-1.7768	0.0695039	-25.5641	3.83e-144	4.26e-142
ALG-1	cel-miR-787-3p	miRNA	487.963	-3.09914	0.121354	-25.538	7.46e-144	8.24e-142
ALG-1	WBGene00020797	protein_coding_AS	1287.36	1.66135	0.0652056	25.4786	3.4e-143	3.74e-141
ALG-1	cel-miR-59-3p	miRNA	14155.2	-0.96912	0.0380521	-25.4682	4.44e-143	4.85e-141
ALG-1	WBGene00019729	protein_coding_AS	1252.94	-1.69539	0.067007	-25.3016	3.06e-141	3.33e-139
ALG-1	WBGene00185077	protein_coding_AS	15133.7	-0.809734	0.03212	-25.2096	3.14e-140	3.4e-138
ALG-1	WBGene00017186	protein_coding_AS	1536.88	-1.43914	0.0572553	-25.1355	2.04e-139	2.18e-137
ALG-1	WBGene00021107	protein_coding_AS	1536.88	-1.43914	0.0572553	-25.1355	2.04e-139	2.18e-137
ALG-1	WBGene00013773	protein_coding_AS	18289.3	-0.767227	0.0305398	-25.1222	2.84e-139	3.02e-137
ALG-1	WBGene00015456	protein_coding_AS	1294.93	-1.55604	0.0619393	-25.1221	2.85e-139	3.02e-137
ALG-1	WBGene00194675	pseudogene_AS	2832.18	-1.44953	0.0578134	-25.0726	9.91e-139	1.04e-136
ALG-1	WBGene00016307	protein_coding_AS	449.131	-3.05966	0.122064	-25.0661	1.17e-138	1.22e-136
ALG-1	cel-miR-240-3p	miRNA	1241.63	-1.91885	0.076746	-25.0026	5.73e-138	5.97e-136
ALG-1	WBGene00021678	protein_coding_AS	1096.44	-1.64553	0.0660295	-24.9212	4.39e-137	4.55e-135
ALG-1	WBGene00007600	protein_coding_AS	774.439	-2.01596	0.0809198	-24.9131	5.37e-137	5.54e-135
ALG-1	WBGene00044799	protein_coding_AS	4161.35	-0.968633	0.0389343	-24.8787	1.27e-136	1.3e-134
ALG-1	WBGene00019420	protein_coding_AS	831.915	-2.00076	0.080942	-24.7184	6.78e-135	6.92e-133
ALG-1	WBGene00013693	protein_coding_AS	280.659	4.35556	0.177011	24.6062	1.08e-133	1.1e-131
ALG-1	cel-miR-241-5p	miRNA	2814.69	-1.2396	0.0504084	-24.5912	1.57e-133	1.59e-131
ALG-1	WBGene00007672	protein_coding_AS	4318.17	1.0057	0.0409704	24.547	4.66e-133	4.69e-131
ALG-1	WBGene00019899	protein_coding_AS	771.669	-1.95189	0.0796186	-24.5155	1.01e-132	1.01e-130
ALG-1	WBGene00045495	protein_coding_AS	494.424	2.43274	0.0992972	24.4996	1.49e-132	1.49e-130
ALG-1	WBGene00012113	protein_coding_AS	665.681	-7.10858	0.291298	-24.4031	1.58e-131	1.57e-129
ALG-1	WBGene00219477	pseudogene_AS	3518.73	-1.06376	0.0436533	-24.3683	3.71e-131	3.66e-129
ALG-1	cel-miR-77-3p	miRNA	60899.2	-1.62929	0.0672372	-24.2319	1.03e-129	1.01e-127
ALG-1	WBGene00020306	pseudogene_AS	3798.35	-0.962858	0.0397495	-24.2231	1.27e-129	1.24e-127
ALG-1	cel-miR-62	miRNA	407.945	-3.15847	0.130498	-24.2033	2.05e-129	2e-127
ALG-1	cel-miR-234-3p	miRNA	2580.85	-1.335	0.0552977	-24.1421	9.05e-129	8.76e-127
ALG-1	WBGene00020301	protein_coding_AS	1072.9	-1.74579	0.0723586	-24.127	1.3e-128	1.26e-126
ALG-1	WBGene00003552	protein_coding_AS	2585.9	1.07643	0.0446501	24.1082	2.05e-128	1.97e-126
ALG-1	LONGPAL3	dfam_repeats_AS	7688.87	-0.77288	0.032145	-24.0436	9.75e-128	9.3e-126
ALG-1	WBGene00021671	pseudogene_AS	6351.27	-0.860121	0.0357923	-24.0309	1.32e-127	1.26e-125
ALG-1	WBGene00019365	protein_coding_AS	626.961	-2.31841	0.0966656	-23.9838	4.11e-127	3.88e-125
ALG-1	WBGene00199017	ncRNA_AS	805.527	-1.90156	0.0793568	-23.9621	6.91e-127	6.5e-125
ALG-1	WBGene00013403	protein_coding_AS	1594.67	-1.38293	0.0579238	-23.875	5.57e-126	5.22e-124
ALG-1	CER12-LTR_CE	dfam_repeats_AS	7711.64	-0.80731	0.0339104	-23.8071	2.82e-125	2.62e-123
ALG-1	WBGene00018615	protein_coding_AS	519.475	-2.40796	0.101427	-23.7408	1.37e-124	1.27e-122
ALG-1	WBGene00019735	protein_coding_AS	11377.1	-0.888267	0.0375525	-23.654	1.07e-123	9.91e-122
ALG-1	WBGene00013613	protein_coding_AS	5103.52	1.01317	0.0428434	23.6481	1.23e-123	1.13e-121
ALG-1	WBGene00044401	protein_coding_AS	8034.54	-0.794313	0.0337164	-23.5587	1.02e-122	9.36e-121
ALG-1	WBGene00011049	protein_coding_AS	2672.82	-1.19501	0.0507639	-23.5405	1.57e-122	1.43e-120
ALG-1	WBGene00016076	pseudogene_AS	787.325	-1.90954	0.0811819	-23.5217	2.45e-122	2.22e-120
ALG-1	WBGene00014130	protein_coding_AS	6603.6	-1.00257	0.0426679	-23.4971	4.37e-122	3.95e-120
ALG-1	WBGene00014213	protein_coding_AS	588.923	-2.33339	0.100163	-23.2958	4.89e-120	4.39e-118
ALG-1	cel-miR-58a-5p	miRNA	1424.88	1.56297	0.0671767	23.2666	9.67e-120	8.65e-118
ALG-1	WBGene00013306	protein_coding_AS	2014.91	-1.3131	0.0568685	-23.0901	5.82e-118	5.19e-116
ALG-1	WBGene00019814	protein_coding_AS	673.432	-2.31965	0.100595	-23.0594	1.18e-117	1.05e-115
ALG-1	WBGene00011393	protein_coding_AS	406.252	-2.87235	0.124572	-23.0578	1.23e-117	1.09e-115
ALG-1	WBGene00010654	protein_coding_AS	314.802	6.1327	0.26603	23.0527	1.38e-117	1.22e-115
ALG-1	cel-miR-53-5p	miRNA	5261.64	-0.99889	0.0433696	-23.032	2.23e-117	1.95e-115
ALG-1	WBGene00012854	protein_coding_AS	967.767	-1.63719	0.0711361	-23.0149	3.31e-117	2.89e-115
ALG-1	WBGene00008681	protein_coding_AS	1871.48	-1.44358	0.0630408	-22.8992	4.73e-116	4.11e-114
ALG-1	CELE45	dfam_repeats_AS	9635.64	-0.737364	0.032242	-22.8696	9.32e-116	8.04e-114
ALG-1	WBGene00011497	protein_coding_AS	375.333	-2.91849	0.127615	-22.8696	9.34e-116	8.04e-114
ALG-1	WBGene00006616	protein_coding_AS	3389.27	-0.924861	0.0405706	-22.7964	4.98e-115	4.27e-113
ALG-1	WBGene00022100	protein_coding_AS	1935.24	-1.22007	0.0537805	-22.6862	6.14e-114	5.24e-112
ALG-1	WBGene00018456	protein_coding_AS	600.088	-2.11065	0.0931313	-22.6632	1.03e-113	8.78e-112
ALG-1	WBGene00021939	protein_coding_AS	2532.28	-1.05528	0.0466867	-22.6034	4.01e-113	3.4e-111
ALG-1	cel-miR-359	miRNA	786.313	-2.01657	0.0893033	-22.5811	6.65e-113	5.6e-111
ALG-1	WBGene00022465	protein_coding_AS	279.166	5.76637	0.255392	22.5785	7.05e-113	5.92e-111
ALG-1	WBGene00017422	protein_coding_AS	507.376	-2.34918	0.104168	-22.5518	1.29e-112	1.08e-110
ALG-1	WBGene00018608	protein_coding_AS	559.333	2.04766	0.0909207	22.5213	2.57e-112	2.13e-110
ALG-1	cel-miR-788-3p	miRNA	312.303	-4.33212	0.192814	-22.4679	8.55e-112	7.09e-110
ALG-1	WBGene00006272	protein_coding_AS	246.027	3.93952	0.17547	22.4512	1.24e-111	1.03e-109
ALG-1	WBGene00020778	protein_coding_AS	873.863	-1.70515	0.0761334	-22.3968	4.23e-111	3.48e-109
ALG-1	WBGene00007485	pseudogene_AS	1049.78	-1.76101	0.078645	-22.392	4.71e-111	3.86e-109
ALG-1	WBGene00006640	protein_coding_AS	573.32	-2.24162	0.100641	-22.2736	6.67e-110	5.44e-108
ALG-1	WBGene00010451	protein_coding_AS	3413.5	-0.95118	0.0428301	-22.2082	2.86e-109	2.32e-107
ALG-1	WBGene00044989	protein_coding_AS	1132.78	1.4069	0.0634663	22.1677	7.04e-109	5.69e-107
ALG-1	WBGene00018193	protein_coding_AS	2279.97	-1.07215	0.0484187	-22.1434	1.21e-108	9.74e-107
ALG-1	WBGene00235353	pseudogene_AS	7853.33	-0.769942	0.0347929	-22.1293	1.65e-108	1.33e-106
ALG-1	WBGene00000514	protein_coding_AS	1126.17	-1.50025	0.0678216	-22.1205	2.01e-108	1.61e-106
ALG-1	cel-miR-45-5p	miRNA	1118.94	1.8093	0.0821104	22.035	1.33e-107	1.06e-105
ALG-1	WBGene00015735	protein_coding_AS	9813.15	-0.665764	0.0302433	-22.0136	2.13e-107	1.69e-105
ALG-1	WBGene00023404	protein_coding_AS	521.17	-2.54237	0.115705	-21.9729	5.23e-107	4.13e-105
ALG-1	WBGene00001480	protein_coding_AS	1206.45	-1.48926	0.0678176	-21.9598	6.98e-107	5.49e-105
ALG-1	WBGene00008945	protein_coding_AS	3248.76	1.01719	0.0464077	21.9185	1.73e-106	1.36e-104
ALG-1	cel-miR-1822-3p	miRNA	307.138	-3.3098	0.151204	-21.8896	3.26e-106	2.55e-104
ALG-1	WBGene00021193	protein_coding_AS	759.023	-1.73669	0.0796189	-21.8126	1.76e-105	1.37e-103
ALG-1	cel-miR-39-3p	miRNA	35503.1	-1.57945	0.0724859	-21.7898	2.9e-105	2.25e-103
ALG-1	WBGene00013795	protein_coding_AS	10416.6	0.644825	0.0295937	21.7893	2.93e-105	2.26e-103
ALG-1	WBGene00020930	protein_coding_AS	2862.36	1.05851	0.0485915	21.7839	3.3e-105	2.54e-103
ALG-1	WBGene00007750	protein_coding_AS	649.879	-1.87013	0.0858658	-21.7797	3.61e-105	2.77e-103
ALG-1	WBGene00009361	protein_coding_AS	1430.19	-1.3768	0.0632282	-21.7751	4e-105	3.05e-103
ALG-1	cel-miR-46-5p	miRNA	631.588	-1.9994	0.0918585	-21.7661	4.86e-105	3.7e-103
ALG-1	WBGene00019517	pseudogene_AS	21138	-0.841626	0.0386986	-21.7482	7.18e-105	5.44e-103
ALG-1	WBGene00198964	ncRNA_AS	709.861	-1.84027	0.0847083	-21.7248	1.2e-104	9.02e-103
ALG-1	WBGene00044220	pseudogene_AS	2484.39	-1.12858	0.0519732	-21.7146	1.49e-104	1.12e-102
ALG-1	WBGene00269433	protein_coding_AS	414.654	2.38464	0.110097	21.6595	4.94e-104	3.7e-102
ALG-1	WBGene00009020	pseudogene_AS	407.434	-2.80546	0.129761	-21.6202	1.16e-103	8.65e-102
ALG-1	WBGene00219205	protein_coding_AS	460.807	2.18418	0.101177	21.5878	2.34e-103	1.74e-101
ALG-1	WBGene00015102	protein_coding_AS	646.41	1.75577	0.0813652	21.5789	2.84e-103	2.1e-101
ALG-1	WBGene00012103	protein_coding_AS	650.549	-1.94305	0.0901712	-21.5485	5.47e-103	4.04e-101
ALG-1	WBGene00001671	protein_coding_AS	5619.96	-0.771025	0.0358294	-21.5193	1.03e-102	7.55e-101
ALG-1	WBGene00004798	protein_coding_AS	548.434	2.0421	0.0952335	21.4431	5.3e-102	3.88e-100
ALG-1	CER16-2-I_CE	dfam_repeats_AS	28037.1	-0.591551	0.0275956	-21.4365	6.11e-102	4.46e-100
ALG-1	WBGene00044281	protein_coding_AS	327.111	-3.25423	0.152326	-21.3635	2.92e-101	2.12e-99
ALG-1	WBGene00020318	protein_coding_AS	406.333	2.25938	0.105798	21.3557	3.45e-101	2.5e-99
ALG-1	WBGene00013321	protein_coding_AS	890.339	-1.6078	0.0753366	-21.3415	4.68e-101	3.38e-99
ALG-1	WBGene00000465	protein_coding_AS	1356.17	1.23873	0.0580441	21.3411	4.72e-101	3.39e-99
ALG-1	WBGene00045056	protein_coding_AS	482.812	-2.35028	0.110251	-21.3174	7.82e-101	5.61e-99
ALG-1	WBGene00006951	protein_coding_AS	221.058	5.18709	0.243819	21.2744	1.96e-100	1.4e-98
ALG-1	WBGene00018898	protein_coding_AS	4767.1	0.777649	0.0365856	21.2556	2.92e-100	2.08e-98
ALG-1	cel-miR-2-3p	miRNA	991.257	-1.70419	0.0802162	-21.245	3.67e-100	2.6e-98
ALG-1	WBGene00015430	protein_coding_AS	635.571	-1.89869	0.0894739	-21.2206	6.16e-100	4.35e-98
ALG-1	WBGene00269376	ncRNA_AS	6650.52	-0.731114	0.0344865	-21.2	9.55e-100	6.73e-98
ALG-1	WBGene00019267	protein_coding_AS	3887.88	-1.01877	0.0482068	-21.1333	3.93e-99	2.76e-97
ALG-1	WBGene00022048	protein_coding_AS	3328.71	0.958947	0.0453934	21.1253	4.66e-99	3.26e-97
ALG-1	WBGene00271809	ncRNA_AS	7863	-0.692948	0.0328172	-21.1154	5.75e-99	4.01e-97
ALG-1	WBGene00002151	protein_coding_AS	559.572	-1.97702	0.0937477	-21.0888	1.01e-98	7.01e-97
ALG-1	WBGene00000780	protein_coding_AS	7022.6	-0.708525	0.0336981	-21.0257	3.82e-98	2.65e-96
ALG-1	cel-miR-245-3p	miRNA	1299.02	-1.3221	0.0628907	-21.0222	4.11e-98	2.83e-96
ALG-1	WBGene00013270	protein_coding_AS	3490.57	0.904972	0.0432619	20.9185	3.64e-97	2.5e-95
ALG-1	WBGene00001830	protein_coding_AS	3008.41	0.915822	0.0438459	20.8873	6.99e-97	4.79e-95
ALG-1	WBGene00006994	protein_coding_AS	5540.18	0.738712	0.0354729	20.8247	2.59e-96	1.77e-94
ALG-1	TIR9TA1_CE	dfam_repeats_AS	1956.61	-1.09019	0.0524554	-20.7832	6.14e-96	4.18e-94
ALG-1	cel-miR-355-5p	miRNA	388.962	-2.57408	0.124181	-20.7285	1.92e-95	1.3e-93
ALG-1	WBGene00014801	protein_coding_AS	4289.86	-0.996978	0.048152	-20.7048	3.13e-95	2.12e-93
ALG-1	WBGene00013603	protein_coding_AS	1395.25	-1.25454	0.0607186	-20.6615	7.69e-95	5.18e-93
ALG-1	WBGene00013698	protein_coding_AS	1001.47	-1.54949	0.0750177	-20.655	8.8e-95	5.92e-93
ALG-1	WBGene00305065	pseudogene_AS	1074.52	-1.40734	0.0683652	-20.5856	3.7e-94	2.47e-92
ALG-1	WBGene00020630	protein_coding_AS	1748.11	-1.12823	0.0548373	-20.5742	4.68e-94	3.12e-92
ALG-1	WBGene00011236	protein_coding_AS	7066.26	-0.701904	0.034121	-20.571	4.99e-94	3.32e-92
ALG-1	WBGene00014663	pseudogene_AS	13135.1	-0.863889	0.0420902	-20.5247	1.29e-93	8.59e-92
ALG-1	WBGene00012407	protein_coding_AS	2090.26	-1.06372	0.0519012	-20.4951	2.38e-93	1.57e-91
ALG-1	WBGene00004202	protein_coding_AS	432.27	-2.35075	0.114706	-20.4938	2.45e-93	1.61e-91
ALG-1	WBGene00012227	protein_coding_AS	1761.13	1.03929	0.0511126	20.3333	6.52e-92	4.28e-90
ALG-1	WBGene00000497	protein_coding_AS	692.642	-1.66151	0.0817883	-20.3148	9.51e-92	6.22e-90
ALG-1	WBGene00013244	protein_coding_AS	1551.04	-1.18986	0.0586202	-20.2979	1.34e-91	8.75e-90
ALG-1	WBGene00018783	protein_coding_AS	304.825	2.59504	0.127849	20.2978	1.35e-91	8.75e-90
ALG-1	WBGene00007924	protein_coding_AS	642.4	-1.7308	0.0852789	-20.2957	1.4e-91	9.09e-90
ALG-1	WBGene00019131	pseudogene_AS	1162.29	-1.29395	0.0637642	-20.2927	1.49e-91	9.63e-90
ALG-1	WBGene00004509	protein_coding_AS	1504.4	-1.11815	0.0551672	-20.2684	2.44e-91	1.57e-89
ALG-1	WBGene00010453	protein_coding_AS	3314.01	-0.880271	0.0435124	-20.2303	5.29e-91	3.4e-89
ALG-1	WBGene00011398	protein_coding_AS	4202.71	-0.801345	0.0396292	-20.2211	6.39e-91	4.09e-89
ALG-1	WBGene00018900	protein_coding_AS	3830.56	0.799942	0.0395628	20.2196	6.59e-91	4.2e-89
ALG-1	CER9-I_CE	dfam_repeats_AS	98940.5	-0.523937	0.0260248	-20.1323	3.85e-90	2.45e-88
ALG-1	cel-miR-83-5p	miRNA	359.773	2.32349	0.115445	20.1264	4.33e-90	2.75e-88
ALG-1	cel-miR-1-3p	miRNA	241532	-1.59032	0.0791435	-20.0941	8.31e-90	5.25e-88
ALG-1	NeSL-1	dfam_repeats_AS	135352	-0.491559	0.0244972	-20.0659	1.47e-89	9.23e-88
ALG-1	cel-miR-76-3p	miRNA	551.616	-1.85222	0.0924247	-20.0403	2.45e-89	1.54e-87
ALG-1	WBGene00219315	protein_coding_AS	891.528	-1.63481	0.0817365	-20.001	5.4e-89	3.38e-87
ALG-1	WBGene00001638	protein_coding_AS	3323.87	-0.846196	0.0424229	-19.9467	1.6e-88	1e-86
ALG-1	WBGene00020756	protein_coding_AS	545.977	-2.0545	0.103053	-19.9364	1.97e-88	1.22e-86
ALG-1	CER15-I_CE	dfam_repeats_AS	33634.8	-0.516959	0.0259574	-19.9157	2.98e-88	1.84e-86
ALG-1	WBGene00196396	ncRNA_AS	4244.66	-0.84176	0.0422666	-19.9155	2.99e-88	1.84e-86
ALG-1	WBGene00201398	ncRNA_AS	4244.66	-0.84176	0.0422666	-19.9155	2.99e-88	1.84e-86
ALG-1	WBGene00196099	ncRNA_AS	635.228	-1.73991	0.0874611	-19.8935	4.63e-88	2.85e-86
ALG-1	WBGene00008622	protein_coding_AS	4945.04	-0.880749	0.0443204	-19.8723	7.07e-88	4.33e-86
ALG-1	WBGene00000518	protein_coding_AS	4915.69	-0.760432	0.0386486	-19.6755	3.5e-86	2.14e-84
ALG-1	WBGene00012758	protein_coding_AS	693.875	-1.71009	0.0869562	-19.6661	4.21e-86	2.56e-84
ALG-1	WBGene00008178	protein_coding_AS	6497.99	-0.659672	0.0336023	-19.6318	8.28e-86	5.03e-84
ALG-1	WBGene00015922	protein_coding_AS	222.106	3.20132	0.163259	19.6089	1.3e-85	7.86e-84
ALG-1	WBGene00021465	protein_coding_AS	5059.54	0.721784	0.036826	19.5999	1.55e-85	9.36e-84
ALG-1	WBGene00021239	protein_coding_AS	30047.8	-0.551283	0.0281288	-19.5985	1.59e-85	9.59e-84
ALG-1	WBGene00006067	protein_coding_AS	30770	-0.514956	0.0262929	-19.5854	2.06e-85	1.24e-83
ALG-1	WBGene00010934	protein_coding_AS	1885.9	-1.02153	0.0521741	-19.5793	2.32e-85	1.39e-83
ALG-1	WBGene00007309	protein_coding_AS	31174.5	-0.549576	0.0280758	-19.5747	2.54e-85	1.52e-83
ALG-1	MIRAGE1	dfam_repeats_AS	11258.5	-0.626786	0.0320423	-19.5612	3.31e-85	1.97e-83
ALG-1	WBGene00017405	protein_coding_AS	450.517	-2.22991	0.114068	-19.5489	4.22e-85	2.5e-83
ALG-1	WBGene00077712	protein_coding_AS	457.088	-2.02052	0.103711	-19.4821	1.56e-84	9.21e-83
ALG-1	WBGene00006789	protein_coding_AS	447.245	1.90277	0.0977069	19.4743	1.81e-84	1.07e-82
ALG-1	WBGene00021863	protein_coding_AS	2783.87	-0.859512	0.0441598	-19.4637	2.23e-84	1.31e-82
ALG-1	WBGene00018224	pseudogene_AS	687.096	-1.61971	0.0832655	-19.4524	2.78e-84	1.63e-82
ALG-1	WBGene00019705	protein_coding_AS	332.583	-2.64114	0.135776	-19.4521	2.8e-84	1.63e-82
ALG-1	WBGene00016216	protein_coding_AS	2749.39	-0.931355	0.0481488	-19.3433	2.32e-83	1.35e-81
ALG-1	WBGene00003602	protein_coding_AS	382.095	-2.29088	0.118454	-19.3397	2.49e-83	1.45e-81
ALG-1	WBGene00019909	protein_coding_AS	427.781	-2.03322	0.105147	-19.337	2.62e-83	1.52e-81
ALG-1	cel-miR-37-3p	miRNA	70268.1	-1.63127	0.0844493	-19.3166	3.9e-83	2.25e-81
ALG-1	WBGene00014090	protein_coding_AS	423.595	-2.38651	0.123896	-19.2623	1.11e-82	6.42e-81
ALG-1	WBGene00022834	protein_coding_AS	2907.26	-0.864884	0.0449009	-19.2621	1.12e-82	6.43e-81
ALG-1	WBGene00017942	pseudogene_AS	349.027	-2.36531	0.12311	-19.213	2.88e-82	1.65e-80
ALG-1	WBGene00013859	protein_coding_AS	3868.63	-0.821622	0.0428123	-19.1912	4.38e-82	2.5e-80
ALG-1	WBGene00022413	protein_coding_AS	421.14	-2.04026	0.106517	-19.1542	8.92e-82	5.08e-80
ALG-1	WBGene00022163	pseudogene_AS	12250.2	-0.727799	0.0380129	-19.1461	1.04e-81	5.92e-80
ALG-1	WBGene00016639	protein_coding_AS	1314.58	-1.12936	0.0590328	-19.1311	1.39e-81	7.88e-80
ALG-1	WBGene00020852	protein_coding_AS	444.776	-2.05461	0.107567	-19.1008	2.49e-81	1.4e-79
ALG-1	cel-miR-229-3p	miRNA	661.591	-1.63236	0.0855437	-19.0822	3.55e-81	2e-79
ALG-1	WBGene00019858	protein_coding_AS	1310.36	1.23477	0.0647915	19.0576	5.68e-81	3.19e-79
ALG-1	WBGene00019713	protein_coding_AS	869.707	-1.36593	0.0716946	-19.0521	6.31e-81	3.53e-79
ALG-1	WBGene00004751	protein_coding_AS	1709.19	-1.02058	0.0536005	-19.0404	7.89e-81	4.41e-79
ALG-1	WBGene00020564	protein_coding_AS	604.578	-1.66008	0.0872164	-19.0341	8.91e-81	4.96e-79
ALG-1	WBGene00010779	protein_coding_AS	884.833	1.3069	0.0686674	19.0324	9.2e-81	5.11e-79
ALG-1	WBGene00010976	protein_coding_AS	281.064	-2.90986	0.153033	-19.0145	1.29e-80	7.16e-79
ALG-1	WBGene00004827	protein_coding_AS	1953.47	-1.21089	0.0637289	-19.0006	1.69e-80	9.32e-79
ALG-1	WBGene00014807	protein_coding_AS	516.969	-1.97554	0.104331	-18.9352	5.85e-80	3.22e-78
ALG-1	WBGene00016885	protein_coding_AS	8009.16	-0.720688	0.0381034	-18.914	8.74e-80	4.81e-78
ALG-1	CEMUDR1	dfam_repeats_AS	13792.7	-0.566092	0.029941	-18.9069	1e-79	5.48e-78
ALG-1	WBGene00015320	protein_coding_AS	1984.13	-1.00017	0.0529756	-18.8798	1.67e-79	9.14e-78
ALG-1	cel-miR-35-3p	miRNA	64013.7	-1.73216	0.0920436	-18.8189	5.29e-79	2.88e-77
ALG-1	WBGene00017182	protein_coding_AS	969.045	-3.20146	0.170508	-18.776	1.19e-78	6.45e-77
ALG-1	WBGene00019611	protein_coding_AS	2666.28	-0.925531	0.0493889	-18.7396	2.35e-78	1.28e-76
ALG-1	WBGene00022231	protein_coding_AS	329.684	-2.31277	0.123622	-18.7084	4.23e-78	2.28e-76
ALG-1	WBGene00269438	protein_coding_AS	10234	-0.578088	0.0309191	-18.6968	5.26e-78	2.84e-76
ALG-1	WBGene00008537	pseudogene_AS	857.535	-1.44412	0.0772882	-18.6849	6.57e-78	3.53e-76
ALG-1	cel-miR-237-5p	miRNA	26501.3	-1.62763	0.0872231	-18.6606	1.04e-77	5.56e-76
ALG-1	cel-miR-1829a-5p	miRNA	341.171	-2.46496	0.132225	-18.6422	1.46e-77	7.82e-76
ALG-1	WBGene00020256	protein_coding_AS	237.262	-3.001	0.161521	-18.5796	4.7e-77	2.51e-75
ALG-1	WBGene00007667	pseudogene_AS	535.8	-1.89502	0.102067	-18.5665	6e-77	3.19e-75
ALG-1	LINE2C1_CE	dfam_repeats_AS	3663.53	-0.770455	0.0415196	-18.5564	7.24e-77	3.84e-75
ALG-1	WBGene00017344	protein_coding_AS	7625.03	-0.696017	0.0375175	-18.5518	7.89e-77	4.17e-75
ALG-1	CER10-LTR_CE	dfam_repeats_AS	3310.41	-0.839511	0.045258	-18.5494	8.24e-77	4.35e-75
ALG-1	WBGene00012831	protein_coding_AS	644.43	-1.56437	0.0843896	-18.5375	1.03e-76	5.42e-75
ALG-1	WBGene00010550	protein_coding_AS	3990.33	-0.76069	0.0411309	-18.4944	2.29e-76	1.2e-74
ALG-1	WBGene00009089	protein_coding_AS	325.842	-2.59855	0.14066	-18.4739	3.35e-76	1.75e-74
ALG-1	WBGene00007928	protein_coding_AS	388.476	-2.04146	0.110516	-18.4721	3.47e-76	1.81e-74
ALG-1	WBGene00021333	protein_coding_AS	1408.21	-1.05464	0.0571676	-18.4483	5.38e-76	2.81e-74
ALG-1	WBGene00002181	protein_coding_AS	878.436	-1.43174	0.0776724	-18.4331	7.13e-76	3.71e-74
ALG-1	WBGene00002229	protein_coding_AS	7353.5	0.656494	0.0357252	18.3762	2.04e-75	1.06e-73
ALG-1	cel-miR-34-5p	miRNA	1805.51	-0.968168	0.052787	-18.341	3.89e-75	2.01e-73
ALG-1	WBGene00007124	protein_coding_AS	2635.89	-0.896292	0.0489286	-18.3184	5.91e-75	3.05e-73
ALG-1	WBGene00021808	protein_coding_AS	2205.19	-0.86706	0.0473474	-18.3127	6.55e-75	3.37e-73
ALG-1	WBGene00000735	protein_coding_AS	223.3	-3.12568	0.171307	-18.246	2.22e-74	1.14e-72
ALG-1	cel-miR-795-5p	miRNA	628.549	-1.65427	0.0907392	-18.2311	2.92e-74	1.5e-72
ALG-1	WBGene00018862	pseudogene_AS	3581.52	-0.782998	0.0429837	-18.2162	3.84e-74	1.96e-72
ALG-1	WBGene00003133	protein_coding_AS	3579.9	0.737497	0.0405794	18.1742	8.27e-74	4.21e-72
ALG-1	WBGene00003750	protein_coding_AS	1107.71	1.15979	0.0638639	18.1604	1.06e-73	5.4e-72
ALG-1	WBGene00013249	protein_coding_AS	4749.53	-0.807817	0.0444918	-18.1565	1.14e-73	5.78e-72
ALG-1	WBGene00010756	protein_coding_AS	308.188	-2.61187	0.144019	-18.1356	1.67e-73	8.44e-72
ALG-1	WBGene00021037	pseudogene_AS	8949.94	-0.583085	0.0321587	-18.1315	1.8e-73	9.07e-72
ALG-1	WBGene00016345	protein_coding_AS	379.784	-2.09395	0.115881	-18.0699	5.5e-73	2.77e-71
ALG-1	cel-miR-248	miRNA	2412.99	-1.1351	0.0629558	-18.0301	1.13e-72	5.67e-71
ALG-1	cel-miR-1820-5p	miRNA	1868.14	-0.958337	0.0531829	-18.0196	1.37e-72	6.84e-71
ALG-1	WBGene00008568	protein_coding_AS	2016.62	0.865267	0.0480207	18.0186	1.39e-72	6.95e-71
ALG-1	WBGene00011629	protein_coding_AS	1989.24	1.01541	0.0565154	17.9669	3.54e-72	1.76e-70
ALG-1	WBGene00007405	protein_coding_AS	1216.03	-1.14414	0.0636971	-17.9623	3.85e-72	1.91e-70
ALG-1	WBGene00013639	protein_coding_AS	1318.52	-1.08951	0.0606572	-17.9617	3.89e-72	1.93e-70
ALG-1	WBGene00008819	protein_coding_AS	660.766	-1.54249	0.0860117	-17.9334	6.47e-72	3.2e-70
ALG-1	WBGene00003903	protein_coding_AS	1614.17	-1.09559	0.0611447	-17.918	8.54e-72	4.21e-70
ALG-1	WBGene00219399	protein_coding_AS	492.176	-1.74919	0.0976439	-17.914	9.17e-72	4.51e-70
ALG-1	WBGene00017148	protein_coding_AS	708.301	-1.50016	0.083759	-17.9104	9.78e-72	4.8e-70
ALG-1	WBGene00013222	protein_coding_AS	244.864	-2.71076	0.151373	-17.9078	1.03e-71	5.02e-70
ALG-1	WBGene00022165	protein_coding_AS	296.882	-2.33763	0.130587	-17.9009	1.16e-71	5.67e-70
ALG-1	WBGene00022129	protein_coding_AS	1561.74	-1.10911	0.0620374	-17.8781	1.75e-71	8.52e-70
ALG-1	WBGene00003089	protein_coding_AS	236.93	2.69446	0.150831	17.864	2.25e-71	1.09e-69
ALG-1	WBGene00016435	protein_coding_AS	741.919	-1.38635	0.0780363	-17.7654	1.31e-70	6.35e-69
ALG-1	cel-miR-253-3p	miRNA	1261.12	-1.34457	0.0757928	-17.7401	2.06e-70	9.94e-69
ALG-1	WBGene00016558	protein_coding_AS	13197.6	-0.571306	0.0322076	-17.7382	2.12e-70	1.03e-68
ALG-1	WBGene00000275	protein_coding_AS	5626.45	0.620075	0.034987	17.723	2.79e-70	1.34e-68
ALG-1	no_feature	no_feature	1.0601e+06	-0.41991	0.0237907	-17.6502	1.01e-69	4.87e-68
ALG-1	WBGene00003600	protein_coding_AS	534.64	-1.72624	0.0979244	-17.6283	1.49e-69	7.16e-68
ALG-1	WBGene00017979	protein_coding_AS	1092.85	-1.13085	0.0644608	-17.5432	6.7e-69	3.2e-67
ALG-1	WBGene00012222	protein_coding_AS	1337.83	0.991679	0.0566197	17.5147	1.11e-68	5.28e-67
ALG-1	WBGene00009323	protein_coding_AS	957.252	-1.19415	0.0682167	-17.5053	1.3e-68	6.21e-67
ALG-1	WBGene00022594	protein_coding_AS	188.454	2.93477	0.167662	17.5041	1.33e-68	6.33e-67
ALG-1	WBGene00013673	protein_coding_AS	7273.47	-0.617842	0.0353838	-17.4612	2.83e-68	1.34e-66
ALG-1	WBGene00015014	protein_coding_AS	2394.64	-0.804283	0.0461282	-17.4358	4.41e-68	2.08e-66
ALG-1	WBGene00001829	protein_coding_AS	6351.78	0.650048	0.0372925	17.4311	4.79e-68	2.26e-66
ALG-1	WBGene00018390	protein_coding_AS	9701.08	-0.554958	0.031893	-17.4006	8.17e-68	3.84e-66
ALG-1	WBGene00012710	protein_coding_AS	229.34	-2.80469	0.161266	-17.3917	9.54e-68	4.47e-66
ALG-1	WBGene00023479	protein_coding_AS	609.433	-1.52819	0.0878731	-17.3908	9.68e-68	4.53e-66
ALG-1	WBGene00006727	protein_coding_AS	1874.1	0.895385	0.0517611	17.2984	4.84e-67	2.26e-65
ALG-1	WBGene00011365	protein_coding_AS	275.572	-2.44042	0.141207	-17.2826	6.36e-67	2.96e-65
ALG-1	WBGene00003648	protein_coding_AS	726.737	-1.36532	0.0790557	-17.2703	7.87e-67	3.66e-65
ALG-1	WBGene00000903	protein_coding_AS	633.874	-1.46308	0.0847247	-17.2687	8.1e-67	3.76e-65
ALG-1	WBGene00000469	protein_coding_AS	224.656	-2.73197	0.158231	-17.2657	8.53e-67	3.95e-65
ALG-1	WBGene00003848	protein_coding_AS	475.74	-1.67482	0.0971269	-17.2436	1.25e-66	5.77e-65
ALG-1	WBGene00019198	protein_coding_AS	1770.95	-0.904671	0.052497	-17.2328	1.51e-66	6.94e-65
ALG-1	WBGene00015016	pseudogene_AS	2112.41	-0.8472	0.0493413	-17.1702	4.44e-66	2.04e-64
ALG-1	WBGene00000075	protein_coding_AS	765.578	-1.30462	0.0759985	-17.1664	4.74e-66	2.17e-64
ALG-1	WBGene00010868	protein_coding_AS	605.027	-1.56525	0.0911825	-17.1661	4.76e-66	2.18e-64
ALG-1	WBGene00013799	protein_coding_AS	943.608	-1.22378	0.0713677	-17.1476	6.55e-66	2.99e-64
ALG-1	WBGene00008949	protein_coding_AS	1535.32	0.927372	0.0541086	17.1391	7.58e-66	3.45e-64
ALG-1	WBGene00021606	pseudogene_AS	37505	-0.44351	0.0258928	-17.1287	9.07e-66	4.12e-64
ALG-1	WBGene00009299	protein_coding_AS	209.731	-2.83504	0.165533	-17.1267	9.38e-66	4.25e-64
ALG-1	WBGene00015630	protein_coding_AS	194.362	2.80019	0.163516	17.1249	9.68e-66	4.38e-64
ALG-1	WBGene00002063	protein_coding_AS	866.655	-1.25766	0.0736008	-17.0876	1.84e-65	8.29e-64
ALG-1	WBGene00013537	pseudogene_AS	5468.57	-0.601862	0.0352696	-17.0646	2.72e-65	1.23e-63
ALG-1	WBGene00020902	protein_coding_AS	9559.45	-0.568577	0.0333369	-17.0555	3.18e-65	1.43e-63
ALG-1	WBGene00044692	protein_coding_AS	309.004	-2.22473	0.130942	-16.9902	9.7e-65	4.35e-63
ALG-1	WBGene00077756	protein_coding_AS	410.642	-1.88479	0.111113	-16.9627	1.55e-64	6.93e-63
ALG-1	WBGene00017106	protein_coding_AS	1070.6	-1.11269	0.0656022	-16.9612	1.59e-64	7.1e-63
ALG-1	WBGene00007680	protein_coding_AS	3779.6	-0.690439	0.0407395	-16.9477	2e-64	8.92e-63
ALG-1	WBGene00013038	protein_coding_AS	2561.8	0.841701	0.0497512	16.9182	3.3e-64	1.47e-62
ALG-1	WBGene00015111	protein_coding_AS	1968.58	-1.13086	0.0673195	-16.7984	2.51e-63	1.11e-61
ALG-1	WBGene00007849	protein_coding_AS	407.926	-1.83366	0.109182	-16.7946	2.67e-63	1.18e-61
ALG-1	WBGene00009937	protein_coding_AS	744.953	1.26067	0.075076	16.7919	2.8e-63	1.23e-61
ALG-1	WBGene00015492	protein_coding_AS	1567.59	-1.04845	0.0624516	-16.7881	2.98e-63	1.31e-61
ALG-1	cel-miR-786-3p	miRNA	846.479	-1.344	0.0800588	-16.7877	3e-63	1.32e-61
ALG-1	WBGene00019638	pseudogene_AS	4819.74	-0.658547	0.0392338	-16.7852	3.13e-63	1.37e-61
ALG-1	WBGene00018712	pseudogene_AS	449.546	-1.66219	0.0991788	-16.7596	4.82e-63	2.11e-61
ALG-1	WBGene00009288	protein_coding_AS	879.79	1.171	0.0698945	16.7539	5.31e-63	2.32e-61
ALG-1	WBGene00019266	protein_coding_AS	928.102	-1.33007	0.0794409	-16.7429	6.38e-63	2.78e-61
ALG-1	WBGene00195170	lincRNA_AS	755.519	1.38742	0.0830904	16.6977	1.36e-62	5.93e-61
ALG-1	CER16-I_CE	dfam_repeats_AS	21752.1	-0.447262	0.0269022	-16.6255	4.56e-62	1.98e-60
ALG-1	WBGene00010067	protein_coding_AS	675.972	1.34335	0.0809787	16.589	8.38e-62	3.63e-60
ALG-1	WBGene00019491	protein_coding_AS	737.68	-1.44606	0.0873112	-16.5622	1.31e-61	5.65e-60
ALG-1	cel-miR-38-3p	miRNA	292.729	-2.23888	0.135373	-16.5387	1.93e-61	8.33e-60
ALG-1	WBGene00010702	protein_coding_AS	236.461	2.35711	0.14255	16.5354	2.04e-61	8.78e-60
ALG-1	WBGene00008929	protein_coding_AS	4200.27	-0.664331	0.0402771	-16.494	4.05e-61	1.74e-59
ALG-1	LINE2F_CE	dfam_repeats_AS	5468	-0.633879	0.0384366	-16.4915	4.22e-61	1.81e-59
ALG-1	WBGene00018704	protein_coding_AS	257.154	-2.46536	0.149568	-16.4832	4.84e-61	2.07e-59
ALG-1	WBGene00021970	protein_coding_AS	3107.2	-0.730104	0.0444012	-16.4434	9.36e-61	3.99e-59
ALG-1	WBGene00016440	protein_coding_AS	177.051	2.71816	0.165787	16.3955	2.06e-60	8.76e-59
ALG-1	WBGene00013410	pseudogene_AS	652.308	1.28578	0.078501	16.3792	2.69e-60	1.14e-58
ALG-1	WBGene00000190	protein_coding_AS	126.904	3.87818	0.23708	16.3581	3.81e-60	1.61e-58
ALG-1	WBGene00220258	protein_coding_AS	4245.1	0.620423	0.037947	16.3497	4.37e-60	1.85e-58
ALG-1	WBGene00002637	protein_coding_AS	2976.99	0.696444	0.0426055	16.3463	4.62e-60	1.95e-58
ALG-1	WBGene00012474	protein_coding_AS	2858.56	0.708105	0.0433315	16.3416	4.99e-60	2.1e-58
ALG-1	WBGene00010734	protein_coding_AS	7616.82	-0.566766	0.0346979	-16.3343	5.63e-60	2.37e-58
ALG-1	WBGene00016029	protein_coding_AS	2050.73	-0.840941	0.0514945	-16.3307	5.97e-60	2.5e-58
ALG-1	WBGene00020652	protein_coding_AS	4318.46	0.674258	0.0413457	16.3078	8.68e-60	3.64e-58
ALG-1	WBGene00002078	protein_coding_AS	1898.41	0.850655	0.0522126	16.2921	1.12e-59	4.69e-58
ALG-1	WBGene00012623	pseudogene_AS	10397.8	-0.513041	0.0315311	-16.271	1.59e-59	6.61e-58
ALG-1	WBGene00012492	protein_coding_AS	648.944	-1.3266	0.0815331	-16.2706	1.59e-59	6.64e-58
ALG-1	WBGene00000962	protein_coding_AS	6282.42	0.573559	0.0352908	16.2524	2.15e-59	8.92e-58
ALG-1	WBGene00011891	protein_coding_AS	209.806	2.39578	0.147593	16.2323	2.98e-59	1.23e-57
ALG-1	WBGene00044161	ncRNA_AS	23017.5	-0.552172	0.0340602	-16.2116	4.17e-59	1.73e-57
ALG-1	WBGene00018761	protein_coding_AS	569.034	-1.43207	0.0883413	-16.2106	4.24e-59	1.75e-57
ALG-1	WBGene00020684	protein_coding_AS	1977.98	0.812705	0.0501639	16.201	4.96e-59	2.04e-57
ALG-1	WBGene00021790	protein_coding_AS	1002.5	-1.16429	0.0718966	-16.194	5.56e-59	2.28e-57
ALG-1	WBGene00018238	protein_coding_AS	751.071	1.24037	0.076612	16.1903	5.9e-59	2.42e-57
ALG-1	WBGene00020473	protein_coding_AS	350.322	-1.86258	0.115282	-16.1567	1.02e-58	4.17e-57
ALG-1	WBGene00018606	protein_coding_AS	193.408	-2.82238	0.175123	-16.1166	1.95e-58	7.97e-57
ALG-1	WBGene00004795	protein_coding_AS	4585.25	-0.666842	0.0414102	-16.1033	2.42e-58	9.86e-57
ALG-1	WBGene00004239	protein_coding_AS	1612.45	0.845722	0.0525557	16.0919	2.91e-58	1.18e-56
ALG-1	WBGene00000788	protein_coding_AS	255.618	-2.2327	0.138797	-16.0861	3.19e-58	1.3e-56
ALG-1	WBGene00006432	protein_coding_AS	609.532	-1.39445	0.0868634	-16.0534	5.41e-58	2.19e-56
ALG-1	WBGene00001898	protein_coding_AS	20182.8	-0.470492	0.0293302	-16.0412	6.59e-58	2.66e-56
ALG-1	WBGene00008728	protein_coding_AS	326.877	1.81635	0.113308	16.0303	7.85e-58	3.17e-56
ALG-1	WBGene00022334	pseudogene_AS	953.446	-1.11468	0.0695523	-16.0266	8.34e-58	3.36e-56
ALG-1	WBGene00016178	protein_coding_AS	2610.06	0.795477	0.0496955	16.007	1.14e-57	4.59e-56
ALG-1	WBGene00000221	protein_coding_AS	861.108	-1.14498	0.0717025	-15.9684	2.12e-57	8.51e-56
ALG-1	WBGene00016551	protein_coding_AS	369.208	-1.85163	0.116153	-15.9413	3.27e-57	1.31e-55
ALG-1	WBGene00009142	protein_coding_AS	653.051	1.28728	0.0807937	15.933	3.74e-57	1.5e-55
ALG-1	WBGene00021068	protein_coding_AS	773.822	1.18682	0.0745421	15.9214	4.5e-57	1.79e-55
ALG-1	WBGene00002694	protein_coding_AS	2794.41	0.706052	0.0443663	15.9142	5.05e-57	2.01e-55
ALG-1	WBGene00016800	protein_coding_AS	194.794	2.67247	0.168059	15.902	6.14e-57	2.44e-55
ALG-1	WBGene00018325	pseudogene_AS	380.381	1.74606	0.109838	15.8967	6.68e-57	2.65e-55
ALG-1	WBGene00003976	protein_coding_AS	443.322	-1.89022	0.118928	-15.8938	6.99e-57	2.77e-55
ALG-1	WBGene00013632	protein_coding_AS	349.568	-1.80327	0.113788	-15.8477	1.46e-56	5.76e-55
ALG-1	WBGene00004622	rRNA_AS	2190.81	-1.01785	0.064549	-15.7686	5.11e-56	2.02e-54
ALG-1	WBGene00007709	protein_coding_AS	734.29	1.21335	0.0770293	15.7518	6.67e-56	2.63e-54
ALG-1	WBGene00016356	protein_coding_AS	190.111	2.50506	0.159095	15.7457	7.35e-56	2.89e-54
ALG-1	WBGene00019435	protein_coding_AS	267.913	-2.23954	0.142362	-15.7313	9.24e-56	3.62e-54
ALG-1	WBGene00012107	protein_coding_AS	6297.11	-0.536671	0.0341325	-15.7232	1.05e-55	4.1e-54
ALG-1	cel-miR-242	miRNA	245.671	-2.41778	0.153805	-15.7198	1.11e-55	4.32e-54
ALG-1	WBGene00006436	protein_coding_AS	409.079	1.5581	0.0994907	15.6608	2.8e-55	1.09e-53
ALG-1	WBGene00018664	pseudogene_AS	4077.28	-0.619124	0.0395975	-15.6354	4.18e-55	1.62e-53
ALG-1	WBGene00018878	protein_coding_AS	6011.58	-0.601429	0.038506	-15.6191	5.4e-55	2.09e-53
ALG-1	cel-miR-1829a-3p	miRNA	216.99	-2.44316	0.156442	-15.617	5.57e-55	2.16e-53
ALG-1	WBGene00017515	protein_coding_AS	1803.04	-0.841643	0.0538995	-15.615	5.75e-55	2.22e-53
ALG-1	WBGene00006939	pseudogene_AS	234.353	-2.53014	0.162067	-15.6117	6.06e-55	2.34e-53
ALG-1	WBGene00013159	protein_coding_AS	1475.02	-0.887362	0.0570103	-15.5649	1.26e-54	4.85e-53
ALG-1	WBGene00195233	ncRNA_AS	7069.24	0.528639	0.0339647	15.5644	1.27e-54	4.89e-53
ALG-1	WBGene00020297	protein_coding_AS	2793.73	0.684189	0.044031	15.5388	1.89e-54	7.27e-53
ALG-1	WBGene00022517	protein_coding_AS	4415.5	-0.606932	0.0390735	-15.5331	2.07e-54	7.94e-53
ALG-1	WBGene00022257	protein_coding_AS	2786.98	0.736048	0.0474216	15.5214	2.49e-54	9.51e-53
ALG-1	WBGene00018933	protein_coding_AS	1158.47	0.939589	0.0605525	15.5169	2.67e-54	1.02e-52
ALG-1	WBGene00021013	ncRNA_AS	10372.6	-0.4733	0.0305242	-15.5058	3.17e-54	1.21e-52
ALG-1	WBGene00020223	protein_coding_AS	299.967	1.83157	0.118231	15.4914	3.96e-54	1.51e-52
ALG-1	WBGene00012096	protein_coding_AS	288.361	-2.06633	0.133497	-15.4785	4.85e-54	1.84e-52
ALG-1	cel-miR-57-5p	miRNA	29518.1	-1.21881	0.0787465	-15.4776	4.91e-54	1.86e-52
ALG-1	WBGene00018711	pseudogene_AS	1580.32	-1.91351	0.12394	-15.439	8.94e-54	3.38e-52
ALG-1	WBGene00023172	protein_coding_AS	1974.58	-0.779145	0.0506237	-15.3909	1.88e-53	7.1e-52
ALG-1	WBGene00015271	protein_coding_AS	691.136	-1.20119	0.0783411	-15.3328	4.62e-53	1.74e-51
ALG-1	WBGene00021219	protein_coding_AS	691.136	-1.20119	0.0783411	-15.3328	4.62e-53	1.74e-51
ALG-1	WBGene00021353	protein_coding_AS	242.661	-2.1706	0.141727	-15.3154	6.03e-53	2.26e-51
ALG-1	WBGene00007028	protein_coding_AS	3606.58	0.647977	0.0423539	15.2991	7.75e-53	2.9e-51
ALG-1	cel-miR-1020-3p	miRNA	192.138	-3.05255	0.199544	-15.2976	7.93e-53	2.96e-51
ALG-1	WBGene00006594	protein_coding_AS	2064.74	-0.828757	0.0542295	-15.2824	1e-52	3.74e-51
ALG-1	WBGene00000775	protein_coding_AS	378.877	-1.80005	0.117967	-15.2589	1.44e-52	5.35e-51
ALG-1	WBGene00007505	protein_coding_AS	7702.4	0.508646	0.0333373	15.2575	1.47e-52	5.45e-51
ALG-1	WBGene00007721	pseudogene_AS	107.96	4.39272	0.288421	15.2302	2.23e-52	8.27e-51
ALG-1	WBGene00197324	ncRNA_AS	4557.97	-0.586294	0.0384991	-15.2288	2.28e-52	8.44e-51
ALG-1	RTE1	dfam_repeats_AS	18223.9	-0.443504	0.0291512	-15.2139	2.86e-52	1.06e-50
ALG-1	WBGene00022211	pseudogene_AS	1605.97	-0.803171	0.052801	-15.2113	2.98e-52	1.1e-50
ALG-1	WBGene00010425	protein_coding_AS	1667.48	0.800683	0.0526762	15.2001	3.53e-52	1.3e-50
ALG-1	WBGene00009295	pseudogene_AS	217.173	2.17079	0.143001	15.1802	4.78e-52	1.76e-50
ALG-1	WBGene00018652	protein_coding_AS	407.324	1.51945	0.100149	15.1718	5.43e-52	1.99e-50
ALG-1	WBGene00021976	protein_coding_AS	369.138	-1.84591	0.121871	-15.1465	7.99e-52	2.93e-50
ALG-1	WBGene00014208	protein_coding_AS	9119.45	0.492564	0.0325227	15.1453	8.14e-52	2.98e-50
ALG-1	WBGene00004155	protein_coding_AS	270.01	2.06497	0.136444	15.1342	9.63e-52	3.52e-50
ALG-1	WBGene00012866	protein_coding_AS	2305.36	0.706644	0.0467204	15.1249	1.11e-51	4.04e-50
ALG-1	WBGene00012199	protein_coding_AS	118.513	3.59577	0.238452	15.0797	2.2e-51	8.02e-50
ALG-1	WBGene00023036	pseudogene_AS	19374.5	0.507308	0.0337032	15.0522	3.34e-51	1.21e-49
ALG-1	CER15-1-I_CE	dfam_repeats_AS	1980.42	-0.753771	0.0501216	-15.0389	4.09e-51	1.48e-49
ALG-1	WBGene00044736	protein_coding_AS	532.797	1.33557	0.0888423	15.033	4.46e-51	1.61e-49
ALG-1	WBGene00000226	protein_coding_AS	4041.34	0.675552	0.0449829	15.018	5.6e-51	2.02e-49
ALG-1	WBGene00016344	protein_coding_AS	225.592	-2.26138	0.150579	-15.0179	5.61e-51	2.02e-49
ALG-1	WBGene00011867	protein_coding_AS	1872.32	0.764494	0.0509723	14.9982	7.54e-51	2.71e-49
ALG-1	WBGene00003801	protein_coding_AS	2488.67	0.716088	0.0479014	14.9492	1.58e-50	5.66e-49
ALG-1	WBGene00003789	protein_coding_AS	3709.89	0.66006	0.0441815	14.9397	1.82e-50	6.52e-49
ALG-1	WBGene00021036	protein_coding_AS	2226.35	-0.729749	0.0488562	-14.9367	1.9e-50	6.81e-49
ALG-1	WBGene00013221	protein_coding_AS	33730.5	-0.454033	0.0304122	-14.9293	2.12e-50	7.59e-49
ALG-1	WBGene00044961	snRNA_AS	145.511	2.75343	0.184548	14.9199	2.45e-50	8.73e-49
ALG-1	WBGene00012409	protein_coding_AS	123.79	5.80229	0.389047	14.9141	2.67e-50	9.5e-49
ALG-1	WBGene00013717	protein_coding_AS	124.704	3.113	0.209184	14.8816	4.34e-50	1.54e-48
ALG-1	WBGene00017483	protein_coding_AS	13151.6	0.470713	0.0316571	14.8691	5.23e-50	1.86e-48
ALG-1	WBGene00010056	protein_coding_AS	2976.34	0.647381	0.0435505	14.865	5.56e-50	1.97e-48
ALG-1	WBGene00012198	protein_coding_AS	2653.32	-0.676603	0.0455474	-14.8549	6.47e-50	2.29e-48
ALG-1	WBGene00021673	pseudogene_AS	23338.9	-0.409567	0.0275982	-14.8403	8.03e-50	2.84e-48
ALG-1	WBGene00013622	protein_coding_AS	759.094	-1.24087	0.0836731	-14.83	9.38e-50	3.3e-48
ALG-1	WBGene00012933	protein_coding_AS	2196.2	-0.703967	0.0474783	-14.8271	9.78e-50	3.44e-48
ALG-1	WBGene00011498	protein_coding_AS	1210.76	-0.917645	0.0619222	-14.8193	1.1e-49	3.86e-48
ALG-1	WBGene00018468	protein_coding_AS	1139.6	-1.00358	0.0677224	-14.819	1.1e-49	3.87e-48
ALG-1	WBGene00005147	protein_coding_AS	514.425	-1.40032	0.0945473	-14.8108	1.25e-49	4.36e-48
ALG-1	WBGene00007372	protein_coding_AS	3805.17	0.631535	0.0428081	14.7527	2.96e-49	1.03e-47
ALG-1	WBGene00004056	protein_coding_AS	1100.36	-0.994761	0.0674525	-14.7476	3.19e-49	1.11e-47
ALG-1	WBGene00013531	protein_coding_AS	2790.07	-0.646852	0.0439254	-14.7262	4.38e-49	1.52e-47
ALG-1	WBGene00022017	pseudogene_AS	341.935	-1.66908	0.113427	-14.715	5.16e-49	1.79e-47
ALG-1	WBGene00007139	protein_coding_AS	498.248	-1.51207	0.102957	-14.6864	7.88e-49	2.73e-47
ALG-1	WBGene00021369	protein_coding_AS	1245.44	-0.887332	0.0604372	-14.6819	8.42e-49	2.92e-47
ALG-1	WBGene00013554	protein_coding_AS	4113.92	-0.584632	0.0398423	-14.6737	9.51e-49	3.29e-47
ALG-1	WBGene00001215	protein_coding_AS	3406.71	-0.598859	0.0408146	-14.6727	9.65e-49	3.33e-47
ALG-1	WBGene00185098	protein_coding_AS	3057.42	-0.620453	0.0423042	-14.6665	1.06e-48	3.64e-47
ALG-1	WBGene00004484	protein_coding_AS	3230.91	0.633743	0.0432471	14.654	1.27e-48	4.37e-47
ALG-1	WBGene00044504	protein_coding_AS	1053.43	0.964476	0.0658233	14.6525	1.3e-48	4.46e-47
ALG-1	WBGene00195183	protein_coding_AS	184.106	-2.65089	0.18098	-14.6474	1.4e-48	4.8e-47
ALG-1	WBGene00012396	protein_coding_AS	3084.32	-0.683369	0.0466751	-14.641	1.54e-48	5.26e-47
ALG-1	WBGene00021038	protein_coding_AS	814.496	1.06483	0.0727522	14.6364	1.64e-48	5.62e-47
ALG-1	WBGene00008695	protein_coding_AS	720.17	-1.20018	0.0821113	-14.6165	2.2e-48	7.52e-47
ALG-1	WBGene00004423	protein_coding_AS	271.984	-1.86729	0.127811	-14.6098	2.43e-48	8.28e-47
ALG-1	LINE2C_CE	dfam_repeats_AS	1759.7	-0.869644	0.0596923	-14.5688	4.44e-48	1.51e-46
ALG-1	WBGene00010295	pseudogene_AS	1534.16	-0.791706	0.0544065	-14.5517	5.7e-48	1.93e-46
ALG-1	WBGene00001130	protein_coding_AS	277.158	1.81657	0.124933	14.5404	6.72e-48	2.28e-46
ALG-1	WBGene00219558	antisense_RNA	936.881	-0.99562	0.0685201	-14.5303	7.78e-48	2.63e-46
ALG-1	WBGene00020633	protein_coding_AS	157.091	2.61697	0.18047	14.5008	1.2e-47	4.04e-46
ALG-1	cel-miR-243-3p	miRNA	631.721	-1.23753	0.0853441	-14.5005	1.2e-47	4.06e-46
ALG-1	WBGene00077585	protein_coding_AS	2276.71	-0.667146	0.0460156	-14.4983	1.24e-47	4.18e-46
ALG-1	WBGene00013581	protein_coding_AS	4868.46	-0.541961	0.0373823	-14.4978	1.25e-47	4.2e-46
ALG-1	WBGene00045077	pseudogene_AS	6640.45	-0.557293	0.0385208	-14.4673	1.95e-47	6.54e-46
ALG-1	WBGene00017900	protein_coding_AS	283.545	-2.01771	0.139577	-14.4559	2.3e-47	7.71e-46
ALG-1	WBGene00007388	protein_coding_AS	235.44	-2.02142	0.139885	-14.4506	2.48e-47	8.3e-46
ALG-1	WBGene00018929	pseudogene_AS	889.74	-1.03449	0.0715959	-14.449	2.54e-47	8.49e-46
ALG-1	WBGene00001689	protein_coding_AS	4091.73	0.604365	0.0418296	14.4483	2.57e-47	8.56e-46
ALG-1	WBGene00018804	protein_coding_AS	1370.99	0.837792	0.0580093	14.4424	2.8e-47	9.32e-46
ALG-1	WBGene00000636	protein_coding_AS	280.057	-1.86082	0.128862	-14.4404	2.88e-47	9.57e-46
ALG-1	WBGene00006803	protein_coding_AS	598.77	-1.32158	0.0915447	-14.4365	3.05e-47	1.01e-45
ALG-1	WBGene00014672	pseudogene_AS	157.774	-2.75744	0.191011	-14.4361	3.07e-47	1.02e-45
ALG-1	WBGene00021027	protein_coding_AS	1759.18	-0.824468	0.0571237	-14.433	3.21e-47	1.06e-45
ALG-1	WBGene00023209	pseudogene_AS	606.39	-1.19215	0.0826899	-14.4171	4.04e-47	1.33e-45
ALG-1	WBGene00045468	protein_coding_AS	324.15	1.64119	0.113911	14.4076	4.63e-47	1.53e-45
ALG-1	WBGene00077787	ncRNA_AS	985.377	-1.01447	0.0704734	-14.395	5.56e-47	1.83e-45
ALG-1	WBGene00000081	protein_coding_AS	6313.97	-0.486598	0.0338198	-14.388	6.16e-47	2.02e-45
ALG-1	WBGene00164985	protein_coding_AS	229.727	-2.08435	0.144906	-14.3841	6.51e-47	2.13e-45
ALG-1	WBGene00015115	protein_coding_AS	491.942	-1.33259	0.0926627	-14.3811	6.8e-47	2.23e-45
ALG-1	WBGene00003517	protein_coding_AS	542.64	-1.26707	0.0881485	-14.3743	7.5e-47	2.45e-45
ALG-1	WBGene00235272	pseudogene_AS	260.558	-1.97275	0.137247	-14.3737	7.57e-47	2.47e-45
ALG-1	WBGene00012490	protein_coding_AS	198.14	-2.26684	0.157851	-14.3606	9.14e-47	2.98e-45
ALG-1	cel-miR-233-3p	miRNA	476	-1.43417	0.0998817	-14.3587	9.39e-47	3.05e-45
ALG-1	WBGene00010700	protein_coding_AS	235.114	1.90091	0.132409	14.3564	9.72e-47	3.16e-45
ALG-1	WBGene00012196	protein_coding_AS	5961.18	-0.549305	0.0382716	-14.3528	1.02e-46	3.32e-45
ALG-1	WBGene00002297	protein_coding_AS	1626.22	0.807544	0.0563351	14.3346	1.33e-46	4.3e-45
ALG-1	WBGene00020673	protein_coding_AS	405.14	-1.65324	0.115368	-14.3302	1.42e-46	4.58e-45
ALG-1	WBGene00007415	protein_coding_AS	108.043	3.40651	0.238573	14.2787	2.97e-46	9.58e-45
ALG-1	WBGene00014309	pseudogene_AS	975.296	-1.00487	0.0704153	-14.2706	3.34e-46	1.08e-44
ALG-1	WBGene00019208	pseudogene_AS	1027.24	0.929188	0.065136	14.2654	3.6e-46	1.16e-44
ALG-1	WBGene00012374	protein_coding_AS	17050.2	-0.476086	0.0334227	-14.2444	4.86e-46	1.56e-44
ALG-1	WBGene00022441	protein_coding_AS	281.109	-1.81175	0.127379	-14.2233	6.57e-46	2.1e-44
ALG-1	WBGene00003210	protein_coding_AS	4170.7	0.612845	0.0431063	14.217	7.18e-46	2.3e-44
ALG-1	WBGene00008848	protein_coding_AS	10991.7	0.479863	0.0338163	14.1903	1.05e-45	3.36e-44
ALG-1	WBGene00017101	protein_coding_AS	1609.43	-0.77192	0.0544091	-14.1873	1.1e-45	3.5e-44
ALG-1	WBGene00009696	protein_coding_AS	8808.33	-0.509076	0.0358929	-14.1832	1.16e-45	3.71e-44
ALG-1	WBGene00002000	protein_coding_AS	999.378	0.942455	0.0664553	14.1818	1.19e-45	3.78e-44
ALG-1	WBGene00022302	protein_coding_AS	15088.2	-0.446776	0.0315713	-14.1513	1.83e-45	5.82e-44
ALG-1	CeRep53	dfam_repeats_AS	9692.6	-0.426936	0.0301804	-14.1461	1.97e-45	6.25e-44
ALG-1	WBGene00000554	protein_coding_AS	781.792	-1.06173	0.0751732	-14.1238	2.71e-45	8.57e-44
ALG-1	WBGene00045043	ncRNA_AS	893.856	-0.96572	0.0684111	-14.1164	3.01e-45	9.51e-44
ALG-1	WBGene00013429	protein_coding_AS	485.653	-1.31068	0.0929209	-14.1053	3.52e-45	1.11e-43
ALG-1	WBGene00012851	protein_coding_AS	158.55	-2.76464	0.19612	-14.0967	3.98e-45	1.25e-43
ALG-1	CER8-I_CE	dfam_repeats_AS	78817.5	-0.350656	0.024892	-14.0871	4.56e-45	1.43e-43
ALG-1	WBGene00021542	protein_coding_AS	220.674	-2.17616	0.154791	-14.0587	6.81e-45	2.14e-43
ALG-1	WBGene00021637	protein_coding_AS	1317.91	-0.896914	0.0640154	-14.0109	1.34e-44	4.19e-43
ALG-1	WBGene00219609	lincRNA_AS	7751.69	-0.553069	0.039498	-14.0025	1.51e-44	4.71e-43
ALG-1	WBGene00009658	protein_coding_AS	233.384	-1.95071	0.139369	-13.9967	1.63e-44	5.1e-43
ALG-1	WBGene00010433	protein_coding_AS	2223.62	-0.670738	0.0479341	-13.9929	1.72e-44	5.37e-43
ALG-1	WBGene00019139	protein_coding_AS	1638.78	-0.781484	0.05585	-13.9925	1.73e-44	5.39e-43
ALG-1	WBGene00013771	protein_coding_AS	476.942	1.35973	0.0972025	13.9886	1.83e-44	5.69e-43
ALG-1	WBGene00001169	protein_coding_AS	176.229	2.32212	0.166176	13.9739	2.25e-44	6.99e-43
ALG-1	WBGene00022682	protein_coding_AS	1110.92	-0.913794	0.0654574	-13.9601	2.73e-44	8.47e-43
ALG-1	WBGene00012896	protein_coding_AS	21292.9	0.482592	0.0345848	13.9539	2.98e-44	9.23e-43
ALG-1	TC4	dfam_repeats_AS	58270.1	-0.382108	0.0274178	-13.9365	3.8e-44	1.18e-42
ALG-1	WBGene00016637	protein_coding_AS	1271.57	-0.868991	0.0623623	-13.9346	3.91e-44	1.21e-42
ALG-1	WBGene00008107	protein_coding_AS	4869.07	0.544753	0.0390939	13.9345	3.91e-44	1.21e-42
ALG-1	WBGene00015015	protein_coding_AS	955.984	-1.01374	0.0728173	-13.9216	4.68e-44	1.44e-42
ALG-1	WBGene00007354	protein_coding_AS	583.183	1.16962	0.0841518	13.8989	6.43e-44	1.98e-42
ALG-1	WBGene00009846	pseudogene_AS	185.76	2.25978	0.162908	13.8715	9.42e-44	2.89e-42
ALG-1	WBGene00010003	protein_coding_AS	2476.94	-0.677906	0.048882	-13.8682	9.87e-44	3.02e-42
ALG-1	WBGene00010434	protein_coding_AS	215.574	-2.08291	0.150267	-13.8615	1.08e-43	3.32e-42
ALG-1	WBGene00017556	protein_coding_AS	776.984	-1.10228	0.0795875	-13.8499	1.27e-43	3.89e-42
ALG-1	WBGene00021101	protein_coding_AS	28123	-0.401799	0.0290974	-13.8088	2.26e-43	6.88e-42
ALG-1	WBGene00002219	protein_coding_AS	14771.2	0.47342	0.034294	13.8047	2.39e-43	7.27e-42
ALG-1	WBGene00008782	protein_coding_AS	1021.53	-1.01783	0.0737842	-13.7947	2.74e-43	8.34e-42
ALG-1	cel-miR-41-5p	miRNA	732.232	-1.04913	0.0760734	-13.7911	2.89e-43	8.76e-42
ALG-1	WBGene00002206	protein_coding_AS	219.371	1.91173	0.13867	13.7861	3.09e-43	9.36e-42
ALG-1	WBGene00010690	protein_coding_AS	977.527	-1.00851	0.0731649	-13.7841	3.18e-43	9.62e-42
ALG-1	WBGene00000801	pseudogene_AS	38643.3	-0.413959	0.0300773	-13.7632	4.25e-43	1.28e-41
ALG-1	LONGPAL2	dfam_repeats_AS	2783.86	-0.612245	0.0444918	-13.7608	4.38e-43	1.32e-41
ALG-1	WBGene00021015	protein_coding_AS	6705.67	-0.544755	0.0397212	-13.7145	8.31e-43	2.51e-41
ALG-1	WBGene00006974	protein_coding_AS	4033.94	0.572364	0.0417547	13.7078	9.12e-43	2.74e-41
ALG-1	WBGene00019133	pseudogene_AS	4018.17	0.559554	0.0408641	13.693	1.12e-42	3.36e-41
ALG-1	WBGene00017729	pseudogene_AS	9531.47	-0.507931	0.0371009	-13.6905	1.16e-42	3.47e-41
ALG-1	WBGene00271647	ncRNA_AS	197.172	-2.15743	0.157635	-13.6862	1.23e-42	3.68e-41
ALG-1	WBGene00007501	protein_coding_AS	954.468	0.927909	0.0678099	13.684	1.27e-42	3.79e-41
ALG-1	WBGene00006536	protein_coding_AS	4698.78	0.52013	0.0380179	13.6812	1.31e-42	3.93e-41
ALG-1	cel-miR-1-5p	miRNA	347.868	1.45437	0.106334	13.6774	1.39e-42	4.14e-41
ALG-1	WBGene00009962	protein_coding_AS	1389.3	-0.775417	0.0567103	-13.6733	1.47e-42	4.37e-41
ALG-1	WBGene00001833	protein_coding_AS	3954.13	0.592289	0.0433495	13.6631	1.69e-42	5.01e-41
ALG-1	WBGene00018647	protein_coding_AS	4118.22	-0.575746	0.042182	-13.6491	2.04e-42	6.07e-41
ALG-1	WBGene00000463	protein_coding_AS	283.122	-1.71027	0.125427	-13.6356	2.46e-42	7.29e-41
ALG-1	LINE2B_CE	dfam_repeats_AS	2535.88	-0.655499	0.0480973	-13.6286	2.71e-42	8.01e-41
ALG-1	WBGene00007487	protein_coding_AS	232.309	-1.95368	0.143523	-13.6123	3.38e-42	1e-40
ALG-1	WBGene00017225	protein_coding_AS	2228.83	-0.668786	0.0491319	-13.6121	3.4e-42	1e-40
ALG-1	WBGene00010491	protein_coding_AS	355.215	-1.49069	0.109531	-13.6098	3.5e-42	1.03e-40
ALG-1	WBGene00021007	protein_coding_AS	464.596	1.32764	0.0975577	13.6087	3.55e-42	1.05e-40
ALG-1	WBGene00044467	protein_coding_AS	176.628	-2.34048	0.172102	-13.5994	4.04e-42	1.19e-40
ALG-1	(TACCTAGAC)n	dfam_repeats_AS	164.002	-2.4342	0.179202	-13.5835	5.01e-42	1.47e-40
ALG-1	WBGene00194660	protein_coding_AS	52065.4	-0.394948	0.0291801	-13.5348	9.74e-42	2.85e-40
ALG-1	WBGene00006051	protein_coding_AS	227.535	1.88761	0.139579	13.5236	1.14e-41	3.32e-40
ALG-1	WBGene00013507	protein_coding_AS	51884.2	-0.408415	0.0302388	-13.5063	1.44e-41	4.19e-40
ALG-1	WBGene00016724	protein_coding_AS	6880.73	-0.43925	0.0325302	-13.5028	1.5e-41	4.39e-40
ALG-1	WBGene00086560	protein_coding_AS	228.996	-2.32331	0.173041	-13.4264	4.24e-41	1.23e-39
ALG-1	WBGene00050946	pseudogene_AS	622.549	-1.13342	0.08446	-13.4196	4.64e-41	1.35e-39
ALG-1	CER16-LTR_CE	dfam_repeats_AS	759.909	-1.03257	0.0769956	-13.4107	5.23e-41	1.52e-39
ALG-1	WBGene00020018	protein_coding_AS	410.833	-1.36696	0.101937	-13.4099	5.29e-41	1.54e-39
ALG-1	WBGene00012176	protein_coding_AS	116.359	2.94641	0.219846	13.4022	5.87e-41	1.7e-39
ALG-1	WBGene00022377	protein_coding_AS	1861.17	-0.686274	0.051254	-13.3897	6.95e-41	2.01e-39
ALG-1	WBGene00000545	protein_coding_AS	833.281	-0.99303	0.0742311	-13.3775	8.18e-41	2.36e-39
ALG-1	WBGene00022848	protein_coding_AS	5581.75	0.468638	0.0350403	13.3743	8.55e-41	2.47e-39
ALG-1	WBGene00045062	pseudogene_AS	13185.3	-0.41593	0.0311503	-13.3524	1.15e-40	3.31e-39
ALG-1	WBGene00019608	protein_coding_AS	1918.83	0.668359	0.0500616	13.3507	1.17e-40	3.37e-39
ALG-1	WBGene00022270	protein_coding_AS	235.268	-1.86038	0.139491	-13.3369	1.41e-40	4.06e-39
ALG-1	WBGene00006771	protein_coding_AS	839.982	-0.991989	0.0744208	-13.3295	1.56e-40	4.48e-39
ALG-1	cel-miR-259-5p	miRNA	499.901	-1.26835	0.0951606	-13.3286	1.58e-40	4.52e-39
ALG-1	WBGene00016264	protein_coding_AS	302.282	-1.65603	0.124379	-13.3145	1.91e-40	5.46e-39
ALG-1	WBGene00012138	protein_coding_AS	206.516	1.93572	0.145478	13.3059	2.14e-40	6.11e-39
ALG-1	WBGene00044134	protein_coding_AS	403.186	-1.4133	0.106272	-13.2989	2.35e-40	6.7e-39
ALG-1	WBGene00012744	protein_coding_AS	787.635	-1.04208	0.0783831	-13.2946	2.49e-40	7.08e-39
ALG-1	WBGene00016935	protein_coding_AS	202.331	-2.09575	0.157663	-13.2926	2.56e-40	7.27e-39
ALG-1	WBGene00022385	protein_coding_AS	2669.59	-0.598171	0.0450615	-13.2745	3.25e-40	9.24e-39
ALG-1	WBGene00011061	protein_coding_AS	2488.12	0.618768	0.0466509	13.2638	3.75e-40	1.06e-38
ALG-1	WBGene00005961	pseudogene_AS	1334.39	-0.814931	0.0614797	-13.2553	4.21e-40	1.19e-38
ALG-1	WBGene00008226	protein_coding_AS	281.981	-1.62775	0.12281	-13.2543	4.26e-40	1.21e-38
ALG-1	WBGene00011580	protein_coding_AS	1917.81	0.682899	0.0516369	13.225	6.29e-40	1.78e-38
ALG-1	WBGene00016398	protein_coding_AS	350.508	1.4528	0.109923	13.2166	7.04e-40	1.98e-38
ALG-1	WBGene00199722	ncRNA_AS	136.115	-2.71251	0.205494	-13.2	8.78e-40	2.47e-38
ALG-1	WBGene00002228	protein_coding_AS	16216.3	0.443407	0.0335975	13.1976	9.05e-40	2.55e-38
ALG-1	WBGene00001468	protein_coding_AS	289.922	-1.77132	0.134308	-13.1885	1.02e-39	2.87e-38
ALG-1	WBGene00011260	protein_coding_AS	133.586	2.41762	0.183349	13.1859	1.06e-39	2.97e-38
ALG-1	WBGene00009308	protein_coding_AS	267.591	1.65269	0.125347	13.1849	1.07e-39	3e-38
ALG-1	WBGene00002002	protein_coding_AS	18120.3	-0.437782	0.0332036	-13.1848	1.07e-39	3e-38
ALG-1	WBGene00016110	protein_coding_AS	145.839	-2.56235	0.194502	-13.1739	1.24e-39	3.46e-38
ALG-1	WBGene00001433	protein_coding_AS	55810.2	-0.381775	0.0289827	-13.1725	1.26e-39	3.52e-38
ALG-1	WBGene00018433	protein_coding_AS	286.701	-1.67518	0.12739	-13.15	1.7e-39	4.74e-38
ALG-1	WBGene00020183	protein_coding_AS	659.57	-1.05376	0.0802603	-13.1293	2.24e-39	6.22e-38
ALG-1	WBGene00018075	protein_coding_AS	2278.86	-0.60495	0.0460785	-13.1287	2.26e-39	6.27e-38
ALG-1	WBGene00002006	pseudogene_AS	541.235	-1.2215	0.093055	-13.1266	2.32e-39	6.43e-38
ALG-1	WBGene00021487	protein_coding_AS	1783.18	-0.692967	0.0528357	-13.1155	2.68e-39	7.44e-38
ALG-1	WBGene00003393	protein_coding_AS	1577.19	0.708236	0.0540072	13.1137	2.75e-39	7.6e-38
ALG-1	WBGene00002850	protein_coding_AS	2468.78	0.609123	0.0464881	13.1028	3.18e-39	8.77e-38
ALG-1	cel-miR-58a-3p	miRNA	471402	-0.986805	0.0754245	-13.0833	4.1e-39	1.13e-37
ALG-1	WBGene00017160	protein_coding_AS	239.549	-1.76525	0.135106	-13.0657	5.17e-39	1.43e-37
ALG-1	WBGene00000267	protein_coding_AS	206.373	-1.92559	0.147485	-13.0562	5.86e-39	1.61e-37
ALG-1	WBGene00020540	protein_coding_AS	627.442	-1.15132	0.0882053	-13.0527	6.13e-39	1.69e-37
ALG-1	WBGene00004140	protein_coding_AS	408.828	-1.30176	0.0998062	-13.0429	6.97e-39	1.91e-37
ALG-1	WBGene00020435	protein_coding_AS	192.709	1.91509	0.147222	13.0082	1.1e-38	3.01e-37
ALG-1	WBGene00010209	pseudogene_AS	193.77	-2.14083	0.164647	-13.0025	1.18e-38	3.24e-37
ALG-1	WBGene00018612	protein_coding_AS	2859.37	0.548098	0.0421601	13.0004	1.22e-38	3.33e-37
ALG-1	WBGene00022063	protein_coding_AS	2406.21	-0.596614	0.0458954	-12.9994	1.23e-38	3.36e-37
ALG-1	WBGene00044268	pseudogene_AS	2185.76	-0.653138	0.0502862	-12.9884	1.42e-38	3.88e-37
ALG-1	WBGene00004042	protein_coding_AS	5335.64	0.503345	0.0387556	12.9877	1.44e-38	3.91e-37
ALG-1	cel-miR-1817	miRNA	275.326	-1.66891	0.12852	-12.9855	1.48e-38	4.02e-37
ALG-1	WBGene00021209	protein_coding_AS	541.866	-1.16795	0.0899687	-12.9818	1.55e-38	4.21e-37
ALG-1	WBGene00004458	protein_coding_AS	3634.67	0.533314	0.0411022	12.9753	1.69e-38	4.58e-37
ALG-1	WBGene00001085	protein_coding_AS	2597.18	0.593425	0.0457569	12.9691	1.83e-38	4.96e-37
ALG-1	WBGene00006044	protein_coding_AS	481.421	1.23101	0.0949444	12.9656	1.92e-38	5.18e-37
ALG-1	WBGene00021097	protein_coding_AS	2031.02	0.675165	0.0521124	12.9559	2.17e-38	5.87e-37
ALG-1	WBGene00012767	protein_coding_AS	1051.86	0.817018	0.0634608	12.8744	6.27e-38	1.69e-36
ALG-1	WBGene00206421	protein_coding_AS	200.041	1.86109	0.144566	12.8737	6.33e-38	1.7e-36
ALG-1	WBGene00206422	protein_coding_AS	200.041	1.86109	0.144566	12.8737	6.33e-38	1.7e-36
ALG-1	WBGene00004459	protein_coding_AS	4259.55	0.477377	0.037122	12.8597	7.59e-38	2.04e-36
ALG-1	WBGene00006449	protein_coding_AS	272.478	1.60101	0.124499	12.8596	7.6e-38	2.04e-36
ALG-1	WBGene00015647	protein_coding_AS	271.972	-1.61118	0.125492	-12.8389	9.92e-38	2.66e-36
ALG-1	CeRep55	dfam_repeats_AS	793.299	-0.96645	0.0753192	-12.8314	1.09e-37	2.93e-36
ALG-1	WBGene00011680	protein_coding_AS	989.418	0.843296	0.0658171	12.8127	1.39e-37	3.72e-36
ALG-1	WBGene00022090	protein_coding_AS	275.046	1.57843	0.123199	12.812	1.4e-37	3.75e-36
ALG-1	WBGene00021898	protein_coding_AS	4102.2	2.26521	0.176861	12.8079	1.48e-37	3.95e-36
ALG-1	WBGene00017166	protein_coding_AS	846.283	0.920115	0.0718754	12.8015	1.61e-37	4.28e-36
ALG-1	WBGene00014154	protein_coding_AS	1099.87	0.821664	0.064195	12.7995	1.65e-37	4.38e-36
ALG-1	WBGene00009234	protein_coding_AS	348.505	-1.45742	0.113962	-12.7886	1.9e-37	5.04e-36
ALG-1	WBGene00001110	protein_coding_AS	3082.46	0.589002	0.0461084	12.7743	2.28e-37	6.05e-36
ALG-1	WBGene00235383	protein_coding_AS	432.841	1.25432	0.0982219	12.7703	2.4e-37	6.36e-36
ALG-1	WBGene00021274	protein_coding_AS	388.85	-1.33523	0.104559	-12.7701	2.41e-37	6.37e-36
ALG-1	WBGene00021857	protein_coding_AS	1281.5	0.753825	0.0590357	12.769	2.44e-37	6.45e-36
ALG-1	WBGene00010510	protein_coding_AS	138.716	2.36724	0.185401	12.7682	2.47e-37	6.5e-36
ALG-1	WBGene00016650	protein_coding_AS	1338.48	0.754989	0.0592124	12.7505	3.1e-37	8.15e-36
ALG-1	WBGene00001329	protein_coding_AS	301.242	1.47301	0.115537	12.7493	3.15e-37	8.28e-36
ALG-1	WBGene00015698	protein_coding_AS	4207.34	0.535989	0.042045	12.748	3.2e-37	8.4e-36
ALG-1	cel-miR-793	miRNA	757.291	-0.949773	0.0745474	-12.7405	3.52e-37	9.23e-36
ALG-1	WBGene00012899	protein_coding_AS	151.358	-2.3589	0.185274	-12.732	3.93e-37	1.03e-35
ALG-1	WBGene00010032	protein_coding_AS	167.085	-2.2016	0.172935	-12.7308	3.99e-37	1.04e-35
ALG-1	WBGene00018322	protein_coding_AS	1712.67	0.657547	0.0516644	12.7273	4.17e-37	1.09e-35
ALG-1	WBGene00001337	protein_coding_AS	1003.09	0.814723	0.0640597	12.7182	4.69e-37	1.22e-35
ALG-1	WBGene00003585	protein_coding_AS	766.128	-0.962916	0.0757264	-12.7157	4.84e-37	1.26e-35
ALG-1	WBGene00010364	protein_coding_AS	2169.28	-0.612051	0.048152	-12.7108	5.15e-37	1.34e-35
ALG-1	WBGene00011267	protein_coding_AS	4571.8	-0.463972	0.0365204	-12.7045	5.59e-37	1.45e-35
ALG-1	WBGene00050926	pseudogene_AS	625.953	-1.02916	0.0811234	-12.6863	7.04e-37	1.83e-35
ALG-1	WBGene00009602	protein_coding_AS	8667.82	-0.464361	0.0366806	-12.6596	9.9e-37	2.57e-35
ALG-1	WBGene00001840	protein_coding_AS	3169.76	0.540416	0.0427314	12.6468	1.17e-36	3.02e-35
ALG-1	WBGene00219661	lincRNA_AS	5125.9	-0.476942	0.0377513	-12.6338	1.37e-36	3.55e-35
ALG-1	WBGene00006776	protein_coding_AS	1395.26	-0.727764	0.057834	-12.5837	2.6e-36	6.71e-35
ALG-1	WBGene00015929	protein_coding_AS	225.204	1.71631	0.1364	12.5829	2.62e-36	6.76e-35
ALG-1	WBGene00020588	protein_coding_AS	5144.45	0.48203	0.0383682	12.5633	3.36e-36	8.66e-35
ALG-1	WBGene00012156	protein_coding_AS	1742.9	0.637168	0.0507327	12.5593	3.53e-36	9.09e-35
ALG-1	WBGene00009185	protein_coding_AS	217.844	1.69464	0.135111	12.5426	4.36e-36	1.12e-34
ALG-1	cel-miR-356b-3p	miRNA	242.08	-1.70112	0.135701	-12.5357	4.76e-36	1.22e-34
ALG-1	WBGene00044641	protein_coding_AS	716.627	-1.00943	0.0806412	-12.5175	5.99e-36	1.53e-34
ALG-1	WBGene00219748	lincRNA_AS	700.138	0.993764	0.0794297	12.5112	6.48e-36	1.66e-34
ALG-1	WBGene00002008	protein_coding_AS	1940.72	0.630839	0.0504428	12.506	6.92e-36	1.77e-34
ALG-1	WBGene00021893	protein_coding_AS	1165.82	-0.809585	0.06475	-12.5033	7.17e-36	1.83e-34
ALG-1	WBGene00016067	protein_coding_AS	179.887	-2.1281	0.170304	-12.4958	7.87e-36	2.01e-34
ALG-1	WBGene00304826	protein_coding_AS	2281.53	0.578574	0.0463505	12.4826	9.29e-36	2.37e-34
ALG-1	WBGene00010785	protein_coding_AS	14896	0.383596	0.0307331	12.4815	9.41e-36	2.39e-34
ALG-1	WBGene00004304	protein_coding_AS	1155.73	0.762175	0.0611306	12.468	1.12e-35	2.84e-34
ALG-1	WBGene00010732	protein_coding_AS	1142.96	0.750056	0.0601655	12.4665	1.14e-35	2.88e-34
ALG-1	WBGene00021148	protein_coding_AS	1641.06	-0.707962	0.0568419	-12.4549	1.31e-35	3.33e-34
ALG-1	WBGene00018803	protein_coding_AS	1962.41	0.684835	0.0549854	12.4549	1.32e-35	3.33e-34
ALG-1	WBGene00009583	protein_coding_AS	1301.6	-0.71857	0.0577215	-12.4489	1.42e-35	3.58e-34
ALG-1	WBGene00206497	pseudogene_AS	35004.2	-0.421299	0.033848	-12.4468	1.46e-35	3.68e-34
ALG-1	WBGene00012922	protein_coding_AS	220.106	-1.75699	0.14118	-12.445	1.49e-35	3.76e-34
ALG-1	WBGene00018442	protein_coding_AS	165.636	-2.11262	0.169806	-12.4414	1.56e-35	3.92e-34
ALG-1	WBGene00006606	protein_coding_AS	1063.48	-0.834521	0.067186	-12.4211	2.01e-35	5.05e-34
ALG-1	WBGene00007125	protein_coding_AS	38690.7	-0.385289	0.0310341	-12.415	2.17e-35	5.44e-34
ALG-1	WBGene00012219	protein_coding_AS	2897.73	-0.558929	0.0450232	-12.4142	2.19e-35	5.49e-34
ALG-1	WBGene00015914	protein_coding_AS	158.735	-2.28312	0.184396	-12.3816	3.29e-35	8.24e-34
ALG-1	WBGene00000939	protein_coding_AS	1462.63	0.722593	0.0583612	12.3814	3.3e-35	8.25e-34
ALG-1	LINE2H_CE	dfam_repeats_AS	416.357	-1.26159	0.102008	-12.3676	3.91e-35	9.78e-34
ALG-1	WBGene00022015	protein_coding_AS	1086.55	-0.808455	0.0654162	-12.3586	4.38e-35	1.09e-33
ALG-1	WBGene00018426	protein_coding_AS	1910.49	0.668147	0.0540686	12.3574	4.44e-35	1.11e-33
ALG-1	WBGene00012097	protein_coding_AS	1299.42	0.702779	0.0569094	12.3491	4.93e-35	1.23e-33
ALG-1	RCD1	dfam_repeats_AS	209.877	-1.81173	0.146713	-12.3488	4.95e-35	1.23e-33
ALG-1	TIR43YW1_CE	dfam_repeats_AS	386.577	1.24693	0.101085	12.3355	5.83e-35	1.45e-33
ALG-1	WBGene00020678	protein_coding_AS	214.863	-1.77423	0.143979	-12.3229	6.82e-35	1.69e-33
ALG-1	WBGene00018648	pseudogene_AS	20026.8	-0.36439	0.0295727	-12.3218	6.91e-35	1.71e-33
ALG-1	WBGene00010028	protein_coding_AS	343.031	1.31771	0.107227	12.2889	1.04e-34	2.57e-33
ALG-1	WBGene00011638	protein_coding_AS	3373.85	-0.503557	0.0410143	-12.2776	1.19e-34	2.95e-33
ALG-1	WBGene00002994	protein_coding_AS	5101.6	0.495008	0.0403391	12.2712	1.29e-34	3.19e-33
ALG-1	WBGene00021966	protein_coding_AS	160.489	-2.11853	0.17271	-12.2664	1.37e-34	3.39e-33
ALG-1	WBGene00020669	protein_coding_AS	897.28	-1.13241	0.0923765	-12.2586	1.51e-34	3.72e-33
ALG-1	WBGene00011303	protein_coding_AS	727.09	-0.936908	0.0765051	-12.2463	1.76e-34	4.32e-33
ALG-1	WBGene00022434	protein_coding_AS	999.144	-0.792453	0.0647443	-12.2397	1.91e-34	4.69e-33
ALG-1	WBGene00044034	protein_coding_AS	228.787	-1.83617	0.150149	-12.229	2.18e-34	5.34e-33
ALG-1	WBGene00175029	ncRNA_AS	617.153	0.990181	0.0810035	12.2239	2.32e-34	5.68e-33
ALG-1	WBGene00011791	protein_coding_AS	132.432	-2.44514	0.200195	-12.2138	2.62e-34	6.43e-33
ALG-1	WBGene00008506	protein_coding_AS	2953.06	0.536976	0.0439672	12.2131	2.65e-34	6.47e-33
ALG-1	WBGene00006888	protein_coding_AS	4979.96	-0.478388	0.0391886	-12.2073	2.84e-34	6.94e-33
ALG-1	WBGene00020767	protein_coding_AS	740.011	-0.994982	0.0818216	-12.1604	5.05e-34	1.23e-32
ALG-1	WBGene00015868	protein_coding_AS	5860.09	0.568966	0.0468057	12.1559	5.34e-34	1.3e-32
ALG-1	WBGene00006817	protein_coding_AS	6929.08	0.461711	0.0380258	12.142	6.32e-34	1.54e-32
ALG-1	cel-miR-5551-5p	miRNA	135.896	-2.34184	0.193634	-12.0942	1.13e-33	2.75e-32
ALG-1	WBGene00012961	protein_coding_AS	26941.3	-0.92825	0.0769653	-12.0606	1.7e-33	4.14e-32
ALG-1	WBGene00015955	protein_coding_AS	556.138	-1.03161	0.085704	-12.0368	2.28e-33	5.52e-32
ALG-1	WBGene00007789	protein_coding_AS	11937.1	0.41846	0.0347706	12.0349	2.33e-33	5.64e-32
ALG-1	WBGene00012452	protein_coding_AS	18071.3	0.381975	0.0317544	12.029	2.5e-33	6.05e-32
ALG-1	WBGene00018439	protein_coding_AS	1264.44	-0.73541	0.0611857	-12.0193	2.81e-33	6.8e-32
ALG-1	WBGene00013388	protein_coding_AS	279.91	1.4997	0.1248	12.0168	2.9e-33	7e-32
ALG-1	cel-miR-80-3p	miRNA	110460	-1.27734	0.106474	-11.9966	3.7e-33	8.92e-32
ALG-1	WBGene00017975	protein_coding_AS	164.594	2.04337	0.170535	11.9821	4.41e-33	1.06e-31
ALG-1	WBGene00017080	protein_coding_AS	987.501	-0.795024	0.0663923	-11.9747	4.82e-33	1.16e-31
ALG-1	WBGene00006902	protein_coding_AS	647.881	-1.03472	0.0864545	-11.9684	5.2e-33	1.25e-31
ALG-1	WBGene00000207	protein_coding_AS	669.857	-0.940972	0.0786557	-11.9632	5.54e-33	1.33e-31
ALG-1	WBGene00000959	protein_coding_AS	188.667	-1.84799	0.154507	-11.9606	5.72e-33	1.37e-31
ALG-1	WBGene00010585	protein_coding_AS	4884.68	-0.451762	0.0377737	-11.9597	5.78e-33	1.38e-31
ALG-1	WBGene00000802	protein_coding_AS	487.218	1.13371	0.0948368	11.9543	6.16e-33	1.47e-31
ALG-1	WBGene00044896	protein_coding_AS	791.25	0.882627	0.0738736	11.9478	6.67e-33	1.59e-31
ALG-1	WBGene00004204	protein_coding_AS	1361.97	0.673849	0.0564015	11.9474	6.7e-33	1.6e-31
ALG-1	WBGene00012290	pseudogene_AS	633.469	-0.967195	0.081151	-11.9185	9.49e-33	2.26e-31
ALG-1	WBGene00016346	protein_coding_AS	6949.94	-0.432157	0.0363088	-11.9023	1.15e-32	2.74e-31
ALG-1	cel-miR-77-5p	miRNA	8342.52	2.30566	0.193751	11.9001	1.18e-32	2.81e-31
ALG-1	PALTTAA3_CE	dfam_repeats_AS	2972.09	-0.521982	0.0438841	-11.8946	1.26e-32	3e-31
ALG-1	WBGene00004187	protein_coding_AS	4402.43	0.530309	0.044585	11.8943	1.27e-32	3e-31
ALG-1	WBGene00017190	protein_coding_AS	218.295	3.61693	0.304463	11.8797	1.51e-32	3.57e-31
ALG-1	WBGene00011884	protein_coding_AS	678.546	0.961883	0.080993	11.8761	1.57e-32	3.73e-31
ALG-1	WBGene00017252	protein_coding_AS	125.361	-2.69918	0.227386	-11.8705	1.68e-32	3.98e-31
ALG-1	WBGene00016971	protein_coding_AS	1990.96	0.599018	0.050471	11.8686	1.72e-32	4.07e-31
ALG-1	WBGene00019540	protein_coding_AS	560.272	-1.0252	0.0863807	-11.8684	1.73e-32	4.07e-31
ALG-1	WBGene00021301	protein_coding_AS	3395.06	0.490636	0.0413501	11.8654	1.79e-32	4.21e-31
ALG-1	WBGene00018021	protein_coding_AS	106.388	-2.68202	0.226086	-11.8628	1.85e-32	4.34e-31
ALG-1	WBGene00002231	protein_coding_AS	3361.61	0.517893	0.0437502	11.8375	2.5e-32	5.87e-31
ALG-1	WBGene00017951	protein_coding_AS	2935.82	0.587836	0.0496684	11.8352	2.57e-32	6.02e-31
ALG-1	WBGene00003868	protein_coding_AS	812.902	-0.843439	0.0712679	-11.8348	2.58e-32	6.05e-31
ALG-1	cel-miR-5592-3p	miRNA	1263.32	-0.748669	0.0632823	-11.8306	2.71e-32	6.35e-31
ALG-1	WBGene00002065	protein_coding_AS	3764.45	-0.459991	0.0388995	-11.8251	2.89e-32	6.77e-31
ALG-1	WBGene00016913	protein_coding_AS	112.306	2.43258	0.205913	11.8136	3.32e-32	7.76e-31
ALG-1	WBGene00006840	protein_coding_AS	3023.06	0.541408	0.0458297	11.8135	3.33e-32	7.76e-31
ALG-1	CER2-LTR_CE	dfam_repeats_AS	6822.72	-0.433838	0.0367422	-11.8076	3.56e-32	8.31e-31
ALG-1	CER3-I_CE	dfam_repeats_AS	57593.4	-0.318915	0.0270124	-11.8063	3.62e-32	8.43e-31
ALG-1	WBGene00019322	protein_coding_AS	285.456	1.47753	0.125215	11.7999	3.91e-32	9.08e-31
ALG-1	WBGene00021700	protein_coding_AS	9006.04	-0.366667	0.0311657	-11.7651	5.91e-32	1.37e-30
ALG-1	WBGene00003067	pseudogene_AS	6071.98	-0.426918	0.0363003	-11.7608	6.22e-32	1.44e-30
ALG-1	WBGene00015515	protein_coding_AS	4550.52	0.514024	0.043761	11.7461	7.39e-32	1.71e-30
ALG-1	WBGene00008111	protein_coding_AS	20067.1	0.314022	0.0267485	11.7398	7.97e-32	1.84e-30
ALG-1	WBGene00003158	protein_coding_AS	1584.18	0.621584	0.0529572	11.7375	8.19e-32	1.89e-30
ALG-1	WBGene00009233	protein_coding_AS	1298.14	-0.681369	0.0580554	-11.7365	8.28e-32	1.91e-30
ALG-1	WBGene00018943	protein_coding_AS	358.181	-1.29434	0.110318	-11.7328	8.65e-32	1.99e-30
ALG-1	WBGene00002957	protein_coding_AS	1546.15	0.648269	0.0552875	11.7254	9.44e-32	2.18e-30
ALG-1	cel-miR-794-5p	miRNA	254.721	-1.52437	0.130221	-11.7061	1.19e-31	2.73e-30
ALG-1	WBGene00022531	protein_coding_AS	9107.98	0.391623	0.0334591	11.7045	1.21e-31	2.78e-30
ALG-1	WBGene00003157	protein_coding_AS	1001.92	0.745204	0.0636742	11.7034	1.22e-31	2.81e-30
ALG-1	WBGene00012936	protein_coding_AS	2053.18	0.653116	0.0559671	11.6696	1.82e-31	4.18e-30
ALG-1	WBGene00195155	protein_coding_AS	25217.4	-0.340099	0.0291793	-11.6555	2.15e-31	4.93e-30
ALG-1	WBGene00022354	protein_coding_AS	542.407	-1.0105	0.0867195	-11.6525	2.23e-31	5.1e-30
ALG-1	WBGene00195226	protein_coding_AS	6202.34	-0.518174	0.0445208	-11.6389	2.61e-31	5.97e-30
ALG-1	WBGene00017639	protein_coding_AS	136.897	-2.18031	0.187428	-11.6327	2.81e-31	6.41e-30
ALG-1	WBGene00002073	protein_coding_AS	1509.19	0.69166	0.0594673	11.6309	2.87e-31	6.54e-30
ALG-1	WBGene00004377	protein_coding_AS	1491.21	-0.655083	0.056504	-11.5936	4.44e-31	1.01e-29
ALG-1	WBGene00010485	protein_coding_AS	153.792	2.22095	0.191774	11.5811	5.14e-31	1.17e-29
ALG-1	WBGene00018074	protein_coding_AS	142.554	-2.09973	0.18143	-11.5732	5.63e-31	1.28e-29
ALG-1	WBGene00016295	protein_coding_AS	111.93	-2.5043	0.216519	-11.5662	6.11e-31	1.39e-29
ALG-1	WBGene00016120	protein_coding_AS	2162.87	0.56516	0.0488715	11.5642	6.26e-31	1.42e-29
ALG-1	WBGene00010254	protein_coding_AS	160.267	1.87926	0.16256	11.5604	6.54e-31	1.48e-29
ALG-1	WBGene00017885	protein_coding_AS	1204.29	-0.717146	0.0620418	-11.5591	6.64e-31	1.5e-29
ALG-1	WBGene00009697	pseudogene_AS	139.787	-2.12569	0.184038	-11.5502	7.36e-31	1.66e-29
ALG-1	WBGene00010279	protein_coding_AS	2462.2	0.542114	0.0469506	11.5465	7.69e-31	1.74e-29
ALG-1	WBGene00019035	protein_coding_AS	160.492	-1.99362	0.172663	-11.5463	7.7e-31	1.74e-29
ALG-1	WBGene00006815	protein_coding_AS	257.876	-1.47031	0.127393	-11.5415	8.15e-31	1.83e-29
ALG-1	WBGene00001259	protein_coding_AS	1959.96	0.609644	0.0528678	11.5315	9.15e-31	2.06e-29
ALG-1	WBGene00019642	protein_coding_AS	498.884	1.01666	0.0881691	11.5308	9.23e-31	2.07e-29
ALG-1	WBGene00305980	pseudogene_AS	12001.2	-0.355294	0.0308346	-11.5226	1.02e-30	2.28e-29
ALG-1	WBGene00018999	protein_coding_AS	563.227	0.99901	0.0868408	11.5039	1.26e-30	2.83e-29
ALG-1	WBGene00022536	protein_coding_AS	77.8801	3.02277	0.262812	11.5017	1.29e-30	2.9e-29
ALG-1	WBGene00077728	protein_coding_AS	581.453	-0.985604	0.0858127	-11.4855	1.56e-30	3.49e-29
ALG-1	WBGene00006742	protein_coding_AS	331.724	-1.28887	0.112225	-11.4847	1.57e-30	3.52e-29
ALG-1	WBGene00003796	protein_coding_AS	5244.22	0.465872	0.0405787	11.4807	1.65e-30	3.68e-29
ALG-1	WBGene00021858	protein_coding_AS	131.01	2.15334	0.187606	11.478	1.7e-30	3.79e-29
ALG-1	WBGene00014166	protein_coding_AS	701.659	0.910832	0.0794302	11.4671	1.93e-30	4.3e-29
ALG-1	WBGene00019922	protein_coding_AS	132.671	-2.22157	0.194096	-11.4457	2.47e-30	5.49e-29
ALG-1	WBGene00022349	protein_coding_AS	634.897	-1.01384	0.0885782	-11.4457	2.47e-30	5.49e-29
ALG-1	WBGene00013152	protein_coding_AS	22788.5	-0.307464	0.0268651	-11.4448	2.5e-30	5.55e-29
ALG-1	WBGene00010311	protein_coding_AS	165.759	-1.89644	0.165796	-11.4384	2.69e-30	5.96e-29
ALG-1	Chapaev-1_CE	dfam_repeats_AS	5976.9	-0.414222	0.0362189	-11.4366	2.74e-30	6.08e-29
ALG-1	cel-miR-81-5p	miRNA	215.84	1.70271	0.148901	11.4352	2.79e-30	6.17e-29
ALG-1	WBGene00000253	protein_coding_AS	138.659	-2.14661	0.18779	-11.4309	2.93e-30	6.48e-29
ALG-1	WBGene00014048	protein_coding_AS	479.615	1.14079	0.0998063	11.43	2.96e-30	6.54e-29
ALG-1	WBGene00019510	protein_coding_AS	2796.31	0.509675	0.0446787	11.4075	3.83e-30	8.46e-29
ALG-1	WBGene00010362	protein_coding_AS	3810.17	-0.540723	0.0474553	-11.3943	4.46e-30	9.83e-29
ALG-1	WBGene00011066	protein_coding_AS	726.261	-0.912438	0.0800844	-11.3934	4.51e-30	9.92e-29
ALG-1	WBGene00219689	lincRNA_AS	3860.18	-0.451337	0.039641	-11.3856	4.93e-30	1.08e-28
ALG-1	WBGene00003034	protein_coding_AS	2036.99	0.576997	0.0506833	11.3844	5e-30	1.1e-28
ALG-1	WBGene00007500	protein_coding_AS	637.729	0.937095	0.0824071	11.3715	5.8e-30	1.27e-28
ALG-1	WBGene00021344	protein_coding_AS	1956.91	-0.556062	0.0489323	-11.3639	6.33e-30	1.39e-28
ALG-1	WBGene00015534	protein_coding_AS	443.773	1.07794	0.0948975	11.359	6.69e-30	1.46e-28
ALG-1	WBGene00004373	protein_coding_AS	728.634	0.847289	0.0746759	11.3462	7.74e-30	1.69e-28
ALG-1	WBGene00001247	protein_coding_AS	387.431	-1.18125	0.104158	-11.341	8.22e-30	1.8e-28
ALG-1	WBGene00005663	protein_coding_AS	466.547	1.03321	0.0911507	11.3351	8.79e-30	1.92e-28
ALG-1	WBGene00007242	protein_coding_AS	1271.49	-0.769353	0.0678767	-11.3346	8.85e-30	1.93e-28
ALG-1	WBGene00008600	protein_coding_AS	1551.45	-0.611572	0.0539648	-11.3328	9.03e-30	1.97e-28
ALG-1	WBGene00010015	protein_coding_AS	956.296	0.745894	0.0660513	11.2927	1.43e-29	3.1e-28
ALG-1	WBGene00018455	protein_coding_AS	336.806	-1.26938	0.112423	-11.2911	1.45e-29	3.15e-28
ALG-1	WBGene00016326	protein_coding_AS	1863.27	0.566898	0.0502214	11.288	1.5e-29	3.27e-28
ALG-1	WBGene00004874	protein_coding_AS	2231.29	0.519044	0.0460135	11.2802	1.64e-29	3.56e-28
ALG-1	WBGene00001745	protein_coding_AS	4294.3	-0.512998	0.0455094	-11.2723	1.8e-29	3.89e-28
ALG-1	WBGene00003389	protein_coding_AS	2748.04	0.577124	0.0512567	11.2595	2.08e-29	4.5e-28
ALG-1	WBGene00013677	protein_coding_AS	1517.68	0.664163	0.0589925	11.2584	2.11e-29	4.55e-28
ALG-1	WBGene00010243	protein_coding_AS	2653.71	-0.515561	0.0457938	-11.2583	2.11e-29	4.55e-28
ALG-1	WBGene00001911	protein_coding_AS	292.781	-1.38661	0.123166	-11.2581	2.11e-29	4.55e-28
ALG-1	WBGene00008230	protein_coding_AS	220.208	1.50107	0.133376	11.2545	2.2e-29	4.74e-28
ALG-1	WBGene00021646	protein_coding_AS	2568.12	-0.572199	0.0508431	-11.2542	2.21e-29	4.75e-28
ALG-1	WBGene00000262	protein_coding_AS	533.356	1.10224	0.0979448	11.2537	2.22e-29	4.77e-28
ALG-1	WBGene00044487	protein_coding_AS	137.31	-2.16339	0.19225	-11.253	2.24e-29	4.81e-28
ALG-1	WBGene00015941	protein_coding_AS	802.31	0.857089	0.0761733	11.2518	2.27e-29	4.86e-28
ALG-1	WBGene00003798	protein_coding_AS	2015.76	0.576318	0.0512755	11.2396	2.6e-29	5.58e-28
ALG-1	WBGene00003184	protein_coding_AS	771.644	0.807918	0.0719459	11.2295	2.92e-29	6.25e-28
ALG-1	WBGene00003060	protein_coding_AS	2281.03	0.521597	0.0464561	11.2277	2.98e-29	6.37e-28
ALG-1	WBGene00010621	protein_coding_AS	9753.63	0.404093	0.0360125	11.2209	3.22e-29	6.88e-28
ALG-1	WBGene00013156	protein_coding_AS	7448.15	0.406151	0.03622	11.2134	3.5e-29	7.47e-28
ALG-1	WBGene00219725	lincRNA_AS	10399.3	-0.494156	0.0440909	-11.2077	3.74e-29	7.97e-28
ALG-1	WBGene00201512	ncRNA_AS	68.207	3.54193	0.316159	11.203	3.94e-29	8.39e-28
ALG-1	Helitron1_CE	dfam_repeats_AS	26247.6	-0.302087	0.0269932	-11.1912	4.5e-29	9.57e-28
ALG-1	WBGene00016823	protein_coding_AS	1186.93	-0.718185	0.0642198	-11.1832	4.93e-29	1.05e-27
ALG-1	WBGene00000237	protein_coding_AS	222.997	-1.59512	0.142702	-11.178	5.23e-29	1.11e-27
ALG-1	WBGene00001814	protein_coding_AS	2342.83	-0.536109	0.0480746	-11.1516	7.03e-29	1.49e-27
ALG-1	WBGene00006537	protein_coding_AS	1360.83	0.640359	0.0574382	11.1487	7.27e-29	1.54e-27
ALG-1	MARINCE1	dfam_repeats_AS	13706.7	-0.376504	0.0337796	-11.1459	7.5e-29	1.59e-27
ALG-1	WBGene00015049	protein_coding_AS	363.043	1.13431	0.101917	11.1298	8.99e-29	1.9e-27
ALG-1	WBGene00044728	ncRNA_AS	2117.85	0.549531	0.0493899	11.1264	9.33e-29	1.97e-27
ALG-1	WBGene00003367	protein_coding_AS	1955.03	0.650704	0.0585062	11.122	9.81e-29	2.07e-27
ALG-1	WBGene00006784	protein_coding_AS	1908.82	-0.567325	0.0510098	-11.1219	9.82e-29	2.07e-27
ALG-1	WBGene00007850	protein_coding_AS	146.191	-1.95161	0.175506	-11.1198	1e-28	2.11e-27
ALG-1	WBGene00022542	protein_coding_AS	340.056	1.19645	0.107607	11.1187	1.02e-28	2.14e-27
ALG-1	WBGene00047897	piRNA	538.788	-1.11973	0.100712	-11.1181	1.02e-28	2.15e-27
ALG-1	WBGene00012169	protein_coding_AS	292.994	1.31646	0.118422	11.1167	1.04e-28	2.18e-27
ALG-1	WBGene00021264	protein_coding_AS	309.559	-1.30925	0.117789	-11.1152	1.06e-28	2.22e-27
ALG-1	WBGene00005022	protein_coding_AS	542.625	1.0416	0.093726	11.1132	1.08e-28	2.26e-27
ALG-1	WBGene00017641	protein_coding_AS	7600.69	0.424907	0.0382732	11.1019	1.23e-28	2.57e-27
ALG-1	WBGene00007119	protein_coding_AS	2422.43	-0.564677	0.0509161	-11.0903	1.4e-28	2.92e-27
ALG-1	WBGene00023491	protein_coding_AS	204.543	-1.66646	0.150277	-11.0893	1.41e-28	2.95e-27
ALG-1	WBGene00044209	pseudogene_AS	2225.8	0.522176	0.0471224	11.0813	1.55e-28	3.22e-27
ALG-1	WBGene00002036	protein_coding_AS	14853.1	0.366202	0.0330594	11.0771	1.62e-28	3.37e-27
ALG-1	WBGene00016202	protein_coding_AS	2004.29	0.571378	0.0515997	11.0733	1.69e-28	3.52e-27
ALG-1	WBGene00014811	pseudogene_AS	817.193	-0.850371	0.0768101	-11.0711	1.73e-28	3.6e-27
ALG-1	WBGene00017949	protein_coding_AS	7306.96	-0.439603	0.0397381	-11.0625	1.91e-28	3.96e-27
ALG-1	WBGene00008353	protein_coding_AS	575.825	-0.968571	0.08759	-11.058	2e-28	4.16e-27
ALG-1	WBGene00016405	protein_coding_AS	3112.29	0.506886	0.0458418	11.0573	2.02e-28	4.19e-27
ALG-1	WBGene00185076	ncRNA_AS	4442.09	-0.421202	0.0381155	-11.0507	2.18e-28	4.5e-27
ALG-1	WBGene00043056	protein_coding_AS	1179.57	-0.715291	0.064742	-11.0483	2.23e-28	4.62e-27
ALG-1	WBGene00006527	protein_coding_AS	861.838	-0.83243	0.0754182	-11.0375	2.52e-28	5.2e-27
ALG-1	WBGene00045366	pseudogene_AS	15181.8	0.417074	0.0377926	11.0359	2.57e-28	5.29e-27
ALG-1	cel-miR-71-3p	miRNA	1671.67	0.59885	0.0542675	11.0352	2.59e-28	5.33e-27
ALG-1	WBGene00013755	protein_coding_AS	807.127	-0.797037	0.0722393	-11.0333	2.64e-28	5.44e-27
ALG-1	WBGene00009630	protein_coding_AS	3599.92	0.440161	0.0399019	11.0311	2.71e-28	5.57e-27
ALG-1	WBGene00022108	protein_coding_AS	259.338	1.37453	0.124723	11.0207	3.04e-28	6.24e-27
ALG-1	WBGene00021672	pseudogene_AS	6049.35	-0.36805	0.0334412	-11.0059	3.58e-28	7.35e-27
ALG-1	WBGene00219800	ncRNA_AS	1080.75	0.694611	0.0631259	11.0036	3.67e-28	7.53e-27
ALG-1	WBGene00022237	protein_coding_AS	532.698	-0.996374	0.0905785	-11.0001	3.82e-28	7.82e-27
ALG-1	WBGene00019578	protein_coding_AS	303.839	-1.34411	0.122274	-10.9926	4.15e-28	8.49e-27
ALG-1	WBGene00022379	protein_coding_AS	335.085	-1.23539	0.11239	-10.9919	4.18e-28	8.55e-27
ALG-1	WBGene00017582	protein_coding_AS	151.616	1.85101	0.168439	10.9892	4.31e-28	8.8e-27
ALG-1	WBGene00015716	protein_coding_AS	158.888	-1.83569	0.167052	-10.9888	4.33e-28	8.83e-27
ALG-1	WBGene00009101	protein_coding_AS	325.466	1.21389	0.110568	10.9787	4.84e-28	9.87e-27
ALG-1	WBGene00016697	protein_coding_AS	178.446	-1.69198	0.154187	-10.9736	5.12e-28	1.04e-26
ALG-1	WBGene00007378	protein_coding_AS	1620.02	-0.602344	0.0549033	-10.971	5.27e-28	1.07e-26
ALG-1	WBGene00304215	protein_coding_AS	181.759	-1.68361	0.153497	-10.9684	5.42e-28	1.1e-26
ALG-1	WBGene00017264	protein_coding_AS	9486.9	0.334017	0.0304573	10.9667	5.52e-28	1.12e-26
ALG-1	WBGene00013644	pseudogene_AS	2054.13	-0.568316	0.0518349	-10.964	5.7e-28	1.16e-26
ALG-1	CEMUDR2	dfam_repeats_AS	16525	-0.327187	0.0298618	-10.9567	6.17e-28	1.25e-26
ALG-1	WBGene00019636	protein_coding_AS	156.151	-1.90563	0.173985	-10.9528	6.44e-28	1.3e-26
ALG-1	WBGene00010061	protein_coding_AS	2269.73	0.547558	0.0500412	10.9422	7.25e-28	1.47e-26
ALG-1	WBGene00000647	protein_coding_AS	5088.02	-0.400376	0.036604	-10.938	7.58e-28	1.53e-26
ALG-1	cel-miR-74-3p	miRNA	424.072	-1.12309	0.102808	-10.9242	8.83e-28	1.78e-26
ALG-1	WBGene00017802	protein_coding_AS	240.792	1.40805	0.129001	10.9151	9.76e-28	1.97e-26
ALG-1	WBGene00004175	protein_coding_AS	634.351	-0.86741	0.0795912	-10.8983	1.17e-27	2.36e-26
ALG-1	WBGene00044212	protein_coding_AS	127.902	1.94756	0.178759	10.8948	1.22e-27	2.45e-26
ALG-1	WBGene00002183	protein_coding_AS	1229.68	-0.683633	0.062822	-10.8821	1.4e-27	2.82e-26
ALG-1	WBGene00010212	protein_coding_AS	567.882	-0.909283	0.0835723	-10.8802	1.43e-27	2.88e-26
ALG-1	cel-miR-244-5p	miRNA	356.862	-1.17795	0.108326	-10.8741	1.53e-27	3.07e-26
ALG-1	WBGene00014906	pseudogene_AS	910.094	0.739657	0.0680302	10.8725	1.56e-27	3.12e-26
ALG-1	WBGene00009079	protein_coding_AS	289.729	1.27413	0.117194	10.8719	1.57e-27	3.14e-26
ALG-1	WBGene00002204	protein_coding_AS	334.24	1.16051	0.106746	10.8717	1.57e-27	3.14e-26
ALG-1	WBGene00011305	protein_coding_AS	168.412	1.74155	0.160196	10.8713	1.58e-27	3.15e-26
ALG-1	WBGene00174551	piRNA	135.544	2.02164	0.186004	10.8688	1.62e-27	3.24e-26
ALG-1	WBGene00022705	protein_coding_AS	175.083	1.7336	0.159515	10.868	1.64e-27	3.27e-26
ALG-1	WBGene00008659	protein_coding_AS	113.786	2.24044	0.206231	10.8637	1.72e-27	3.42e-26
ALG-1	WBGene00007545	protein_coding_AS	1188.33	-0.652164	0.0600384	-10.8625	1.74e-27	3.46e-26
ALG-1	WBGene00008131	protein_coding_AS	2983.77	0.490813	0.0452016	10.8583	1.82e-27	3.62e-26
ALG-1	LINE2E_CE	dfam_repeats_AS	682.278	-0.854988	0.0788716	-10.8403	2.22e-27	4.41e-26
ALG-1	WBGene00002083	protein_coding_AS	1391.62	0.633467	0.0584409	10.8394	2.24e-27	4.44e-26
ALG-1	WBGene00000140	protein_coding_AS	2947.86	-0.634869	0.0585716	-10.8392	2.24e-27	4.45e-26
ALG-1	WBGene00014562	pseudogene_AS	7716.89	0.368018	0.0340027	10.8232	2.67e-27	5.29e-26
ALG-1	WBGene00007463	protein_coding_AS	1141.53	0.658154	0.0608192	10.8215	2.72e-27	5.39e-26
ALG-1	WBGene00012819	protein_coding_AS	1391.4	0.604941	0.0559249	10.817	2.86e-27	5.65e-26
ALG-1	WBGene00044217	pseudogene_AS	8114.49	-0.380824	0.0352282	-10.8102	3.08e-27	6.08e-26
ALG-1	WBGene00022067	protein_coding_AS	2450.84	-0.507306	0.0469625	-10.8023	3.36e-27	6.62e-26
ALG-1	WBGene00194914	protein_coding_AS	386.557	1.06545	0.0986927	10.7956	3.61e-27	7.12e-26
ALG-1	cel-miR-82-5p	miRNA	227.721	1.56024	0.144532	10.7951	3.63e-27	7.15e-26
ALG-1	WBGene00012592	protein_coding_AS	1188.18	0.67395	0.0624346	10.7945	3.66e-27	7.19e-26
ALG-1	WBGene00013327	protein_coding_AS	245.221	-1.39929	0.129653	-10.7927	3.73e-27	7.33e-26
ALG-1	WBGene00003220	protein_coding_AS	1095.23	0.669073	0.0619964	10.7921	3.75e-27	7.36e-26
ALG-1	WBGene00012289	protein_coding_AS	344.472	-1.18795	0.110191	-10.7808	4.24e-27	8.32e-26
ALG-1	WBGene00001487	protein_coding_AS	159.97	1.72307	0.160059	10.7652	5.03e-27	9.85e-26
ALG-1	WBGene00219758	lincRNA_AS	8531.9	-0.36698	0.0341049	-10.7603	5.3e-27	1.04e-25
ALG-1	WBGene00044586	protein_coding_AS	4536.17	-0.410384	0.0381482	-10.7576	5.45e-27	1.07e-25
ALG-1	WBGene00004167	protein_coding_AS	2896.57	0.476931	0.0443409	10.756	5.55e-27	1.08e-25
ALG-1	WBGene00007578	pseudogene_AS	9477.55	0.348514	0.0324605	10.7365	6.86e-27	1.34e-25
ALG-1	WBGene00022079	pseudogene_AS	103.15	2.19619	0.204706	10.7285	7.48e-27	1.46e-25
ALG-1	WBGene00003085	protein_coding_AS	3043.97	0.450078	0.0419686	10.7242	7.84e-27	1.53e-25
ALG-1	WBGene00019303	protein_coding_AS	3874.58	0.411601	0.0384003	10.7187	8.32e-27	1.62e-25
ALG-1	WBGene00000405	protein_coding_AS	7084.76	0.372228	0.0347364	10.7158	8.58e-27	1.67e-25
ALG-1	WBGene00001603	protein_coding_AS	106.536	2.16021	0.201691	10.7105	9.09e-27	1.77e-25
ALG-1	WBGene00015623	protein_coding_AS	103.669	-2.38195	0.222551	-10.7029	9.86e-27	1.91e-25
ALG-1	WBGene00020612	protein_coding_AS	280.982	-1.34768	0.125964	-10.699	1.03e-26	2e-25
ALG-1	WBGene00010919	protein_coding_AS	15992.5	-0.357935	0.0334622	-10.6967	1.05e-26	2.04e-25
ALG-1	WBGene00003624	protein_coding_AS	215.097	-1.52526	0.142597	-10.6963	1.06e-26	2.05e-25
ALG-1	WBGene00006508	protein_coding_AS	953.25	-0.778132	0.0727882	-10.6904	1.13e-26	2.18e-25
ALG-1	CER11-I_CE	dfam_repeats_AS	4300.82	0.40697	0.0380747	10.6887	1.15e-26	2.22e-25
ALG-1	WBGene00012637	protein_coding_AS	89.1229	2.39766	0.224356	10.6869	1.17e-26	2.26e-25
ALG-1	WBGene00044976	pseudogene_AS	87.7317	-2.70896	0.253587	-10.6825	1.23e-26	2.37e-25
ALG-1	WBGene00008508	protein_coding_AS	188.277	1.63041	0.152645	10.6811	1.25e-26	2.4e-25
ALG-1	WBGene00002221	pseudogene_AS	3829.48	0.450185	0.0421524	10.68	1.26e-26	2.43e-25
ALG-1	WBGene00012848	protein_coding_AS	432.132	-1.076	0.100826	-10.6718	1.38e-26	2.65e-25
ALG-1	WBGene00007024	protein_coding_AS	536.262	0.970238	0.0909588	10.6668	1.46e-26	2.8e-25
ALG-1	WBGene00016194	protein_coding_AS	1019.36	0.695723	0.0652535	10.6618	1.54e-26	2.95e-25
ALG-1	WBGene00009509	protein_coding_AS	32956.6	-0.313909	0.0294841	-10.6467	1.81e-26	3.46e-25
ALG-1	WBGene00015197	protein_coding_AS	315.336	-1.2484	0.117272	-10.6453	1.83e-26	3.51e-25
ALG-1	WBGene00010043	protein_coding_AS	128.368	2.02618	0.19045	10.6389	1.96e-26	3.76e-25
ALG-1	WBGene00194997	snRNA_AS	275.416	-1.30643	0.122949	-10.6258	2.26e-26	4.32e-25
ALG-1	WBGene00001245	protein_coding_AS	129.64	1.95605	0.184214	10.6184	2.45e-26	4.67e-25
ALG-1	WBGene00011562	protein_coding_AS	5099.06	0.384573	0.0362182	10.6182	2.45e-26	4.68e-25
ALG-1	WBGene00009657	protein_coding_AS	532.004	-0.991841	0.0934221	-10.6168	2.49e-26	4.75e-25
ALG-1	WBGene00017606	protein_coding_AS	836.664	-0.748404	0.070512	-10.6138	2.57e-26	4.89e-25
ALG-1	WBGene00021562	protein_coding_AS	482.344	0.965863	0.0910124	10.6124	2.61e-26	4.96e-25
ALG-1	WBGene00022467	protein_coding_AS	181.583	1.57909	0.148804	10.6118	2.63e-26	4.99e-25
ALG-1	WBGene00012484	protein_coding_AS	4131.49	0.431941	0.0407058	10.6113	2.64e-26	5.01e-25
ALG-1	WBGene00008776	protein_coding_AS	1271.49	-0.628423	0.0592263	-10.6105	2.66e-26	5.05e-25
ALG-1	WBGene00001214	protein_coding_AS	4438.99	0.394967	0.0372455	10.6044	2.84e-26	5.39e-25
ALG-1	WBGene00048687	piRNA	1458.76	-0.625703	0.0590482	-10.5965	3.09e-26	5.86e-25
ALG-1	WBGene00022753	protein_coding_AS	320.559	1.18387	0.111772	10.5919	3.25e-26	6.15e-25
ALG-1	WBGene00019812	protein_coding_AS	198.255	1.4789	0.139636	10.5911	3.28e-26	6.19e-25
ALG-1	WBGene00020696	protein_coding_AS	1028.39	0.69629	0.0657433	10.591	3.28e-26	6.19e-25
ALG-1	WBGene00007049	protein_coding_AS	161.067	1.69571	0.160155	10.5879	3.39e-26	6.4e-25
ALG-1	WBGene00011320	protein_coding_AS	1469.38	0.618319	0.0583992	10.5878	3.39e-26	6.4e-25
ALG-1	WBGene00012577	pseudogene_AS	19085.9	-0.327522	0.0309476	-10.5831	3.57e-26	6.72e-25
ALG-1	WBGene00007165	pseudogene_AS	10531.2	-0.329692	0.0311583	-10.5812	3.64e-26	6.85e-25
ALG-1	WBGene00011910	protein_coding_AS	300.507	1.2288	0.116238	10.5714	4.04e-26	7.6e-25
ALG-1	WBGene00007088	protein_coding_AS	3102.64	-0.448527	0.0424288	-10.5713	4.05e-26	7.6e-25
ALG-1	WBGene00022119	protein_coding_AS	1183.69	0.635516	0.0601405	10.5672	4.23e-26	7.93e-25
ALG-1	WBGene00004893	protein_coding_AS	173.205	-1.6608	0.157259	-10.5609	4.52e-26	8.48e-25
ALG-1	WBGene00000875	protein_coding_AS	2190.43	0.509587	0.0482665	10.5578	4.68e-26	8.76e-25
ALG-1	WBGene00016695	protein_coding_AS	105.56	-2.25906	0.214131	-10.5499	5.09e-26	9.51e-25
ALG-1	WBGene00018720	protein_coding_AS	203.453	1.4976	0.142011	10.5457	5.32e-26	9.94e-25
ALG-1	WBGene00019871	protein_coding_AS	2844.29	-0.462178	0.0438345	-10.5437	5.43e-26	1.01e-24
ALG-1	cel-let-7-3p	miRNA	104.781	2.18134	0.206896	10.5431	5.46e-26	1.02e-24
ALG-1	WBGene00019600	protein_coding_AS	8597.24	0.359671	0.0341217	10.5408	5.6e-26	1.04e-24
ALG-1	WBGene00008996	protein_coding_AS	5431.16	-0.379566	0.0360162	-10.5388	5.72e-26	1.07e-24
ALG-1	WBGene00018768	protein_coding_AS	97.0448	-2.61036	0.247755	-10.536	5.89e-26	1.1e-24
ALG-1	WBGene00013712	protein_coding_AS	415.191	1.03307	0.0980578	10.5353	5.94e-26	1.1e-24
ALG-1	WBGene00003654	protein_coding_AS	163.859	-1.78081	0.169055	-10.5339	6.03e-26	1.12e-24
ALG-1	cel-miR-784-5p	miRNA	66.9224	-3.41858	0.324658	-10.5298	6.3e-26	1.17e-24
ALG-1	WBGene00006982	protein_coding_AS	7083.45	-0.383626	0.0364481	-10.5253	6.61e-26	1.22e-24
ALG-1	WBGene00013886	protein_coding_AS	216.054	1.41249	0.134201	10.5252	6.61e-26	1.22e-24
ALG-1	WBGene00017279	protein_coding_AS	372.885	1.06112	0.100838	10.523	6.77e-26	1.25e-24
ALG-1	WBGene00004240	pseudogene_AS	2893.17	-0.463674	0.0440811	-10.5187	7.09e-26	1.31e-24
ALG-1	WBGene00009292	protein_coding_AS	162.12	-1.80037	0.171332	-10.5081	7.93e-26	1.46e-24
ALG-1	WBGene00000123	protein_coding_AS	6932.81	0.374759	0.0356841	10.5021	8.44e-26	1.56e-24
ALG-1	WBGene00010704	protein_coding_AS	374.58	-1.10275	0.105027	-10.4997	8.67e-26	1.6e-24
ALG-1	WBGene00016837	protein_coding_AS	1282.36	0.617157	0.0588514	10.4867	9.94e-26	1.83e-24
ALG-1	WBGene00007169	protein_coding_AS	117.387	2.03781	0.194351	10.4852	1.01e-25	1.86e-24
ALG-1	WBGene00013157	protein_coding_AS	2022.76	-0.508477	0.0484965	-10.4848	1.01e-25	1.86e-24
ALG-1	WBGene00018897	protein_coding_AS	321.144	-1.20432	0.114872	-10.484	1.02e-25	1.88e-24
ALG-1	WBGene00008980	protein_coding_AS	71.3878	2.87097	0.273891	10.4822	1.04e-25	1.91e-24
ALG-1	WBGene00003410	protein_coding_AS	2533.16	0.520074	0.0496329	10.4784	1.09e-25	1.99e-24
ALG-1	cel-miR-47-5p	miRNA	541.52	-0.900979	0.085998	-10.4768	1.1e-25	2.02e-24
ALG-1	WBGene00020140	protein_coding_AS	150.64	1.87136	0.178632	10.4761	1.11e-25	2.04e-24
ALG-1	WBGene00021835	protein_coding_AS	196.744	-1.53959	0.147147	-10.463	1.28e-25	2.34e-24
ALG-1	WBGene00007111	protein_coding_AS	2646.43	0.468296	0.0447743	10.459	1.33e-25	2.43e-24
ALG-1	WBGene00003792	protein_coding_AS	3486.53	0.445428	0.0426538	10.4429	1.58e-25	2.88e-24
ALG-1	WBGene00015970	protein_coding_AS	92.0969	2.27537	0.217965	10.4392	1.64e-25	3e-24
ALG-1	WBGene00004075	protein_coding_AS	2195.25	0.487779	0.0467521	10.4333	1.75e-25	3.18e-24
ALG-1	WBGene00013288	protein_coding_AS	102.686	-2.28089	0.21866	-10.4312	1.79e-25	3.25e-24
ALG-1	WBGene00009681	protein_coding_AS	79.7949	2.63806	0.253214	10.4183	2.05e-25	3.72e-24
ALG-1	WBGene00017235	pseudogene_AS	328.129	-1.1603	0.11138	-10.4174	2.06e-25	3.75e-24
ALG-1	WBGene00021679	protein_coding_AS	1596.03	-0.567254	0.0544539	-10.4172	2.07e-25	3.76e-24
ALG-1	WBGene00004352	protein_coding_AS	518.325	-0.949644	0.0911722	-10.4159	2.1e-25	3.8e-24
ALG-1	WBGene00006699	protein_coding_AS	1331.81	0.607442	0.0583408	10.412	2.19e-25	3.96e-24
ALG-1	WBGene00003562	protein_coding_AS	356.817	1.12738	0.108295	10.4103	2.23e-25	4.03e-24
ALG-1	WBGene00017920	protein_coding_AS	3824.37	0.412983	0.0397192	10.3976	2.54e-25	4.6e-24
ALG-1	WBGene00018418	protein_coding_AS	1332.73	-0.776521	0.0747358	-10.3902	2.75e-25	4.96e-24
ALG-1	WBGene00009919	protein_coding_AS	534.561	-0.89511	0.0861887	-10.3855	2.89e-25	5.21e-24
ALG-1	WBGene00015366	protein_coding_AS	787.8	-0.756399	0.0728338	-10.3853	2.89e-25	5.22e-24
ALG-1	CER10-I_CE	dfam_repeats_AS	27693.9	0.285542	0.0275159	10.3773	3.14e-25	5.67e-24
ALG-1	WBGene00007133	protein_coding_AS	6913.97	-0.391576	0.037754	-10.3718	3.33e-25	6e-24
ALG-1	WBGene00007722	protein_coding_AS	324.652	-1.14127	0.110061	-10.3694	3.42e-25	6.15e-24
ALG-1	WBGene00003676	protein_coding_AS	1986.43	0.53446	0.0515602	10.3658	3.55e-25	6.38e-24
ALG-1	WBGene00019441	pseudogene_AS	3943.48	-0.531322	0.0512593	-10.3654	3.56e-25	6.4e-24
ALG-1	WBGene00086568	protein_coding_AS	73.184	-3.05881	0.295133	-10.3642	3.61e-25	6.48e-24
ALG-1	WBGene00001565	protein_coding_AS	306.305	1.17128	0.113016	10.3639	3.62e-25	6.49e-24
ALG-1	WBGene00000247	protein_coding_AS	1422.88	0.625512	0.0603688	10.3615	3.71e-25	6.65e-24
ALG-1	WBGene00017673	protein_coding_AS	54.5847	3.68026	0.355239	10.3599	3.77e-25	6.75e-24
ALG-1	WBGene00009660	protein_coding_AS	137.729	-1.87455	0.180974	-10.3581	3.84e-25	6.87e-24
ALG-1	WBGene00003021	protein_coding_AS	2118.99	-0.497203	0.0481807	-10.3195	5.75e-25	1.03e-23
ALG-1	WBGene00001017	protein_coding_AS	1994.15	0.542108	0.052565	10.3131	6.15e-25	1.1e-23
ALG-1	WBGene00013370	protein_coding_AS	151.487	-1.7584	0.170541	-10.3107	6.3e-25	1.12e-23
ALG-1	WBGene00021664	pseudogene_AS	467.562	-0.964955	0.093617	-10.3075	6.52e-25	1.16e-23
ALG-1	WBGene00015037	protein_coding_AS	1178.39	-0.675443	0.0655367	-10.3063	6.6e-25	1.17e-23
ALG-1	cel-miR-4816-3p	miRNA	78.0888	-2.84915	0.27645	-10.3062	6.61e-25	1.17e-23
ALG-1	CELE42	dfam_repeats_AS	1419.8	-0.575901	0.0558955	-10.3032	6.82e-25	1.21e-23
ALG-1	WBGene00003073	protein_coding_AS	869.695	0.694319	0.0674646	10.2916	7.69e-25	1.37e-23
ALG-1	WBGene00016382	protein_coding_AS	187.598	1.49514	0.145323	10.2884	7.95e-25	1.41e-23
ALG-1	WBGene00006528	protein_coding_AS	1199.14	0.641222	0.0623325	10.2871	8.05e-25	1.43e-23
ALG-1	WBGene00022366	protein_coding_AS	432.22	-1.04111	0.101233	-10.2842	8.3e-25	1.47e-23
ALG-1	WBGene00009685	protein_coding_AS	222.687	1.40627	0.136892	10.2728	9.34e-25	1.65e-23
ALG-1	WBGene00011388	protein_coding_AS	278.786	-1.39877	0.136301	-10.2624	1.04e-24	1.84e-23
ALG-1	WBGene00044249	protein_coding_AS	7975.23	-0.328623	0.032049	-10.2538	1.14e-24	2.01e-23
ALG-1	WBGene00017672	protein_coding_AS	232.329	1.38955	0.135552	10.2511	1.17e-24	2.06e-23
ALG-1	WBGene00019043	protein_coding_AS	89.3161	-2.50596	0.244492	-10.2497	1.19e-24	2.09e-23
ALG-1	WBGene00018813	pseudogene_AS	368.554	-1.06637	0.104075	-10.2462	1.23e-24	2.17e-23
ALG-1	WBGene00018852	pseudogene_AS	876.644	-0.734304	0.071698	-10.2416	1.29e-24	2.27e-23
ALG-1	WBGene00010289	protein_coding_AS	129.399	1.82756	0.178487	10.2392	1.32e-24	2.33e-23
ALG-1	WBGene00018548	protein_coding_AS	134.122	2.07801	0.203182	10.2273	1.5e-24	2.63e-23
ALG-1	WBGene00044137	protein_coding_AS	391.846	1.04878	0.102608	10.2212	1.59e-24	2.8e-23
ALG-1	WBGene00004043	protein_coding_AS	2613.7	0.451317	0.0441553	10.2211	1.59e-24	2.8e-23
ALG-1	WBGene00003030	protein_coding_AS	787.574	-0.730639	0.0715052	-10.218	1.65e-24	2.89e-23
ALG-1	WBGene00015672	protein_coding_AS	110.531	-2.09462	0.205022	-10.2166	1.67e-24	2.93e-23
ALG-1	WBGene00017774	protein_coding_AS	1972.26	0.514457	0.0503569	10.2162	1.68e-24	2.93e-23
ALG-1	HAT4_CE	dfam_repeats_AS	3351.69	-0.449993	0.04406	-10.2132	1.73e-24	3.03e-23
ALG-1	WBGene00020464	protein_coding_AS	15187	0.347961	0.0340812	10.2098	1.79e-24	3.13e-23
ALG-1	WBGene00012020	protein_coding_AS	576.189	0.89344	0.0875663	10.203	1.92e-24	3.35e-23
ALG-1	WBGene00004374	protein_coding_AS	2614.75	0.54176	0.0530989	10.2028	1.93e-24	3.36e-23
ALG-1	WBGene00008062	protein_coding_AS	1716.88	0.520765	0.0510505	10.201	1.96e-24	3.42e-23
ALG-1	WBGene00235333	protein_coding_AS	6136.75	-0.406139	0.0398378	-10.1948	2.09e-24	3.64e-23
ALG-1	WBGene00044256	protein_coding_AS	6721.91	-0.34892	0.0342427	-10.1896	2.21e-24	3.84e-23
ALG-1	WBGene00021079	protein_coding_AS	300.793	1.22421	0.120209	10.184	2.34e-24	4.06e-23
ALG-1	WBGene00010241	protein_coding_AS	304.334	1.2193	0.119794	10.1783	2.48e-24	4.3e-23
ALG-1	WBGene00004270	protein_coding_AS	311.47	1.13697	0.111752	10.174	2.59e-24	4.49e-23
ALG-1	WBGene00001973	protein_coding_AS	1261.81	0.612602	0.0602256	10.1718	2.65e-24	4.59e-23
ALG-1	WBGene00016053	protein_coding_AS	458.045	0.945163	0.0930395	10.1587	3.03e-24	5.25e-23
ALG-1	WBGene00017430	protein_coding_AS	93.8326	2.19805	0.216386	10.158	3.05e-24	5.28e-23
ALG-1	WBGene00019165	protein_coding_AS	211.758	1.41099	0.13897	10.1533	3.2e-24	5.54e-23
ALG-1	WBGene00021246	protein_coding_AS	2028.55	-0.548883	0.0541578	-10.1349	3.87e-24	6.68e-23
ALG-1	WBGene00003523	protein_coding_AS	1054.96	0.712073	0.0702806	10.1319	3.99e-24	6.88e-23
ALG-1	WBGene00018841	protein_coding_AS	244.046	1.31804	0.130151	10.127	4.19e-24	7.23e-23
ALG-1	WBGene00007230	protein_coding_AS	929.323	0.677193	0.0669014	10.1223	4.4e-24	7.58e-23
ALG-1	WBGene00002066	protein_coding_AS	1672.29	0.560703	0.0554036	10.1203	4.49e-24	7.73e-23
ALG-1	WBGene00219822	snoRNA_AS	2430.42	0.462062	0.0456762	10.116	4.69e-24	8.07e-23
ALG-1	WBGene00016070	protein_coding_AS	7768.63	-0.391762	0.0387424	-10.112	4.89e-24	8.4e-23
ALG-1	WBGene00016277	protein_coding_AS	2896.38	0.446768	0.0441856	10.1112	4.93e-24	8.46e-23
ALG-1	WBGene00020289	protein_coding_AS	280.797	1.27107	0.12575	10.108	5.09e-24	8.74e-23
ALG-1	WBGene00044243	protein_coding_AS	248.528	1.34124	0.132794	10.1001	5.52e-24	9.46e-23
ALG-1	WBGene00021095	protein_coding_AS	277.936	-1.35877	0.134535	-10.0997	5.54e-24	9.48e-23
ALG-1	WBGene00017303	protein_coding_AS	730.265	0.766169	0.0758605	10.0997	5.54e-24	9.48e-23
ALG-1	WBGene00017643	protein_coding_AS	1068.24	0.645304	0.0638951	10.0994	5.56e-24	9.5e-23
ALG-1	WBGene00007987	protein_coding_AS	326.797	1.07874	0.106813	10.0994	5.56e-24	9.5e-23
ALG-1	WBGene00009708	protein_coding_AS	130.74	1.75465	0.173764	10.0979	5.65e-24	9.63e-23
ALG-1	CELETC2	dfam_repeats_AS	981.732	-0.660339	0.0654171	-10.0943	5.86e-24	9.98e-23
ALG-1	WBGene00001832	protein_coding_AS	5553.31	0.403931	0.0400448	10.087	6.31e-24	1.07e-22
ALG-1	WBGene00007610	protein_coding_AS	221.55	1.33255	0.132194	10.0802	6.76e-24	1.15e-22
ALG-1	WBGene00015639	pseudogene_AS	2224.73	0.499643	0.0495777	10.078	6.91e-24	1.18e-22
ALG-1	WBGene00009867	protein_coding_AS	1557.45	-0.552847	0.0548736	-10.0749	7.13e-24	1.21e-22
ALG-1	CELE14B	dfam_repeats_AS	2829.58	-0.448131	0.0445062	-10.069	7.58e-24	1.29e-22
ALG-1	WBGene00016550	protein_coding_AS	1548.97	0.572641	0.0568795	10.0676	7.68e-24	1.3e-22
ALG-1	WBGene00007705	protein_coding_AS	861.782	-0.71686	0.0712228	-10.065	7.89e-24	1.34e-22
ALG-1	WBGene00016641	protein_coding_AS	156.613	-1.71273	0.170316	-10.0562	8.63e-24	1.46e-22
ALG-1	WBGene00012228	protein_coding_AS	40876.9	-0.266635	0.0265447	-10.0448	9.69e-24	1.64e-22
ALG-1	WBGene00007588	protein_coding_AS	1824.03	0.516691	0.0514682	10.039	1.03e-23	1.74e-22
ALG-1	(AATCC)n	dfam_repeats_AS	51.8563	3.35537	0.334578	10.0287	1.14e-23	1.93e-22
ALG-1	WBGene00012664	protein_coding_AS	69.0727	-3.00412	0.299567	-10.0282	1.15e-23	1.93e-22
ALG-1	WBGene00004889	protein_coding_AS	749.128	-0.75274	0.0750669	-10.0276	1.15e-23	1.94e-22
ALG-1	WBGene00022308	ncRNA_AS	18656.2	-0.301041	0.030023	-10.027	1.16e-23	1.95e-22
ALG-1	WBGene00014156	protein_coding_AS	1931.23	0.49843	0.0497178	10.0252	1.18e-23	1.99e-22
ALG-1	WBGene00022890	protein_coding_AS	1605.98	0.556716	0.0555604	10.02	1.25e-23	2.09e-22
ALG-1	WBGene00017222	protein_coding_AS	156.295	-1.7114	0.170991	-10.0088	1.39e-23	2.34e-22
ALG-1	WBGene00017311	protein_coding_AS	1874.12	-0.506336	0.0506259	-10.0015	1.5e-23	2.52e-22
ALG-1	WBGene00016512	protein_coding_AS	2269.57	0.499992	0.0500034	9.99917	1.54e-23	2.58e-22
ALG-1	WBGene00019883	protein_coding_AS	3493.93	0.486294	0.0486365	9.99853	1.55e-23	2.59e-22
ALG-1	WBGene00016490	protein_coding_AS	136.097	-1.86739	0.186862	-9.99343	1.63e-23	2.73e-22
ALG-1	WBGene00011805	protein_coding_AS	5563.83	-0.346406	0.03467	-9.99152	1.66e-23	2.78e-22
ALG-1	WBGene00194747	protein_coding_AS	133.458	-1.87834	0.188186	-9.9813	1.84e-23	3.08e-22
ALG-1	WBGene00011951	protein_coding_AS	386.752	1.03639	0.103895	9.97537	1.95e-23	3.27e-22
ALG-1	WBGene00011733	protein_coding_AS	2163.33	0.530984	0.053246	9.97228	2.02e-23	3.37e-22
ALG-1	WBGene00021039	protein_coding_AS	342.899	1.06925	0.10736	9.95949	2.29e-23	3.82e-22
ALG-1	WBGene00009550	protein_coding_AS	304.301	1.12316	0.112893	9.94885	2.55e-23	4.25e-22
ALG-1	WBGene00050947	protein_coding_AS	1674.68	-0.521232	0.0524099	-9.94529	2.64e-23	4.4e-22
ALG-1	WBGene00010682	protein_coding_AS	127.604	1.85689	0.186747	9.94333	2.7e-23	4.49e-22
ALG-1	WBGene00269383	ncRNA_AS	9921.13	0.36968	0.0371817	9.94252	2.72e-23	4.52e-22
ALG-1	WBGene00009368	protein_coding_AS	3472.28	0.441537	0.0444168	9.94075	2.77e-23	4.6e-22
ALG-1	WBGene00013987	protein_coding_AS	347.88	1.06065	0.106758	9.93507	2.93e-23	4.86e-22
ALG-1	WBGene00014058	protein_coding_AS	536.056	0.902658	0.0908732	9.93316	2.99e-23	4.95e-22
ALG-1	WBGene00014041	protein_coding_AS	135.664	-1.8253	0.183759	-9.93308	2.99e-23	4.95e-22
ALG-1	WBGene00022739	protein_coding_AS	3457.09	0.437952	0.0440921	9.93266	3e-23	4.97e-22
ALG-1	WBGene00022462	protein_coding_AS	4455.66	-0.366945	0.0369551	-9.92947	3.1e-23	5.13e-22
ALG-1	WBGene00304798	pseudogene_AS	1053.51	-0.646971	0.0653516	-9.89985	4.17e-23	6.89e-22
ALG-1	WBGene00002253	protein_coding_AS	70.0546	-2.83545	0.286646	-9.89181	4.52e-23	7.46e-22
ALG-1	WBGene00007179	protein_coding_AS	2069.91	0.469556	0.0474756	9.89048	4.58e-23	7.56e-22
ALG-1	WBGene00021579	protein_coding_AS	176.088	1.49883	0.15163	9.88482	4.84e-23	7.99e-22
ALG-1	WBGene00010547	protein_coding_AS	474.566	0.94446	0.0956201	9.87721	5.23e-23	8.61e-22
ALG-1	cel-miR-1022-5p	miRNA	170.692	-1.56083	0.158037	-9.87635	5.27e-23	8.68e-22
ALG-1	WBGene00000374	pseudogene_AS	311.082	-1.12294	0.113793	-9.86827	5.71e-23	9.4e-22
ALG-1	WBGene00001258	protein_coding_AS	942.008	0.656012	0.0665162	9.86243	6.06e-23	9.96e-22
ALG-1	WBGene00019302	protein_coding_AS	2373.72	0.470181	0.0477096	9.85506	6.52e-23	1.07e-21
ALG-1	WBGene00015569	protein_coding_AS	257.143	-1.32537	0.134629	-9.84455	7.24e-23	1.19e-21
ALG-1	WBGene00017387	protein_coding_AS	160.945	1.59494	0.162028	9.8436	7.31e-23	1.2e-21
ALG-1	WBGene00006571	protein_coding_AS	1743.74	0.539706	0.0548609	9.83773	7.74e-23	1.27e-21
ALG-1	WBGene00006056	protein_coding_AS	194.397	1.41991	0.14434	9.83724	7.78e-23	1.27e-21
ALG-1	WBGene00003002	protein_coding_AS	3833.62	0.407018	0.041377	9.83682	7.81e-23	1.28e-21
ALG-1	WBGene00008922	protein_coding_AS	149.973	-1.74211	0.177116	-9.83597	7.88e-23	1.29e-21
ALG-1	WBGene00004933	protein_coding_AS	420.518	-0.99639	0.101309	-9.83517	7.94e-23	1.3e-21
ALG-1	WBGene00219678	lincRNA_AS	587.154	-0.818526	0.0832707	-9.8297	8.39e-23	1.37e-21
ALG-1	WBGene00022459	protein_coding_AS	1465.78	-0.538991	0.0548514	-9.82637	8.67e-23	1.41e-21
ALG-1	WBGene00018363	protein_coding_AS	72.4867	-2.76894	0.281794	-9.8261	8.69e-23	1.42e-21
ALG-1	WBGene00045277	protein_coding_AS	502.419	-0.874929	0.0890831	-9.82149	9.1e-23	1.48e-21
ALG-1	WBGene00015500	protein_coding_AS	237.124	1.24404	0.126832	9.80853	1.03e-22	1.68e-21
ALG-1	WBGene00006823	protein_coding_AS	457.783	-0.960451	0.0979546	-9.80507	1.07e-22	1.74e-21
ALG-1	WBGene00002001	protein_coding_AS	864.748	0.664199	0.0677979	9.79676	1.16e-22	1.89e-21
ALG-1	WBGene00020635	protein_coding_AS	219.329	1.29323	0.132085	9.7909	1.23e-22	2e-21
ALG-1	WBGene00194703	protein_coding_AS	120.128	1.85778	0.189838	9.7861	1.29e-22	2.09e-21
ALG-1	WBGene00004054	pseudogene_AS	651.578	-0.785958	0.0803446	-9.78233	1.34e-22	2.17e-21
ALG-1	WBGene00021817	protein_coding_AS	338.555	-1.08859	0.111394	-9.77244	1.48e-22	2.39e-21
ALG-1	WBGene00008079	protein_coding_AS	86.3349	2.17048	0.222111	9.77208	1.48e-22	2.4e-21
ALG-1	WBGene00020915	protein_coding_AS	2267.34	0.475445	0.0486556	9.77165	1.49e-22	2.41e-21
ALG-1	WBGene00020707	protein_coding_AS	96.6594	2.245	0.229752	9.7714	1.49e-22	2.41e-21
ALG-1	WBGene00019723	protein_coding_AS	214.286	-1.35208	0.138378	-9.77086	1.5e-22	2.42e-21
ALG-1	WBGene00017046	protein_coding_AS	175.779	1.47695	0.151186	9.76912	1.53e-22	2.46e-21
ALG-1	WBGene00044744	protein_coding_AS	1065.33	0.732111	0.0749663	9.76587	1.58e-22	2.54e-21
ALG-1	WBGene00009552	protein_coding_AS	1053.55	0.637444	0.0653502	9.75428	1.77e-22	2.85e-21
ALG-1	WBGene00021639	protein_coding_AS	441.63	0.923788	0.0947224	9.75258	1.8e-22	2.89e-21
ALG-1	WBGene00219741	lincRNA_AS	63.9524	-3.21645	0.329827	-9.75194	1.81e-22	2.91e-21
ALG-1	WBGene00018658	pseudogene_AS	1124.34	-0.600373	0.0615815	-9.74925	1.86e-22	2.99e-21
ALG-1	WBGene00003901	protein_coding_AS	1478.75	0.543341	0.0557836	9.74016	2.03e-22	3.26e-21
ALG-1	WBGene00006445	protein_coding_AS	97.6179	-2.14567	0.220508	-9.73057	2.23e-22	3.58e-21
ALG-1	WBGene00019786	protein_coding_AS	479.468	-0.884292	0.0909586	-9.72192	2.43e-22	3.9e-21
ALG-1	WBGene00004313	protein_coding_AS	895.894	0.679554	0.0699093	9.72051	2.47e-22	3.95e-21
ALG-1	WBGene00012855	protein_coding_AS	223.079	-1.35426	0.139344	-9.71887	2.51e-22	4.01e-21
ALG-1	WBGene00004976	protein_coding_AS	1058.81	-0.62296	0.0641236	-9.71498	2.6e-22	4.16e-21
ALG-1	WBGene00013230	protein_coding_AS	168.154	-1.56953	0.161708	-9.70594	2.84e-22	4.54e-21
ALG-1	WBGene00022555	protein_coding_AS	127.459	-1.95306	0.201254	-9.70446	2.89e-22	4.61e-21
ALG-1	WBGene00014027	protein_coding_AS	641.628	-0.760689	0.0784074	-9.70175	2.96e-22	4.73e-21
ALG-1	WBGene00014954	pseudogene_AS	175.545	-1.51168	0.155829	-9.70088	2.99e-22	4.76e-21
ALG-1	WBGene00013290	protein_coding_AS	282.754	1.19823	0.123526	9.70019	3.01e-22	4.79e-21
ALG-1	WBGene00010581	protein_coding_AS	895.025	-0.701072	0.0722891	-9.69817	3.07e-22	4.88e-21
ALG-1	WBGene00021128	protein_coding_AS	136.926	1.82101	0.187842	9.6944	3.19e-22	5.06e-21
ALG-1	WBGene00015634	protein_coding_AS	200.509	1.33659	0.137885	9.69352	3.21e-22	5.1e-21
ALG-1	WBGene00013116	protein_coding_AS	369.825	1.0134	0.104597	9.68862	3.37e-22	5.35e-21
ALG-1	WBGene00021656	protein_coding_AS	287.517	-1.19134	0.122988	-9.68664	3.44e-22	5.45e-21
ALG-1	WBGene00020821	protein_coding_AS	4353.25	0.395507	0.0408349	9.68551	3.47e-22	5.51e-21
ALG-1	WBGene00022262	protein_coding_AS	84.8999	-2.3109	0.238653	-9.68311	3.56e-22	5.63e-21
ALG-1	WBGene00020572	protein_coding_AS	147.251	-1.6691	0.172599	-9.67039	4.03e-22	6.37e-21
ALG-1	WBGene00008661	protein_coding_AS	173.198	1.59779	0.165253	9.66875	4.09e-22	6.47e-21
ALG-1	WBGene00306003	protein_coding_AS	25625.9	0.307487	0.0318496	9.65436	4.71e-22	7.44e-21
ALG-1	WBGene00012012	protein_coding_AS	165.803	1.52906	0.158437	9.65091	4.87e-22	7.69e-21
ALG-1	WBGene00004465	protein_coding_AS	2228.74	0.464552	0.0481444	9.64913	4.96e-22	7.82e-21
ALG-1	WBGene00007539	snoRNA_AS	3510.17	-0.53672	0.0556417	-9.646	5.11e-22	8.06e-21
ALG-1	WBGene00007563	protein_coding_AS	256.549	1.17564	0.1219	9.64436	5.19e-22	8.18e-21
ALG-1	WBGene00220029	snoRNA_AS	483.298	0.851968	0.0884261	9.6348	5.7e-22	8.97e-21
ALG-1	WBGene00019773	protein_coding_AS	233.703	1.28569	0.133452	9.63405	5.74e-22	9.03e-21
ALG-1	WBGene00008001	protein_coding_AS	653.625	0.765482	0.0794905	9.62986	5.98e-22	9.4e-21
ALG-1	WBGene00199557	ncRNA_AS	1112.99	-0.622115	0.0646058	-9.62941	6.01e-22	9.43e-21
ALG-1	WBGene00022301	protein_coding_AS	1493.03	0.5204	0.0540474	9.62857	6.06e-22	9.5e-21
ALG-1	WBGene00001995	protein_coding_AS	169.819	-1.52453	0.158439	-9.62223	6.44e-22	1.01e-20
ALG-1	WBGene00045050	protein_coding_AS	4905.77	-0.371371	0.0386017	-9.62059	6.55e-22	1.03e-20
ALG-1	WBGene00008743	protein_coding_AS	194.258	1.45978	0.15187	9.61202	7.11e-22	1.11e-20
ALG-1	WBGene00015404	protein_coding_AS	472.2	-0.94787	0.0986278	-9.61057	7.21e-22	1.13e-20
ALG-1	WBGene00015928	protein_coding_AS	881.285	-0.662723	0.0690031	-9.60425	7.67e-22	1.2e-20
ALG-1	WBGene00016601	protein_coding_AS	1353.06	0.558911	0.0582084	9.60189	7.85e-22	1.23e-20
ALG-1	WBGene00003795	protein_coding_AS	2881.98	0.459341	0.0478423	9.60116	7.91e-22	1.23e-20
ALG-1	NDNAX1_CE	dfam_repeats_AS	1233.59	-0.574161	0.059836	-9.59557	8.35e-22	1.3e-20
ALG-1	WBGene00001865	protein_coding_AS	1787.2	0.522872	0.0545253	9.58953	8.85e-22	1.38e-20
ALG-1	WBGene00015024	protein_coding_AS	514.206	0.852801	0.0889457	9.58788	8.99e-22	1.4e-20
ALG-1	WBGene00010370	protein_coding_AS	88.6437	-2.25615	0.23545	-9.58229	9.49e-22	1.48e-20
ALG-1	WBGene00011240	protein_coding_AS	2541.25	0.440771	0.0460051	9.58091	9.62e-22	1.5e-20
ALG-1	WBGene00009471	protein_coding_AS	191.951	1.40667	0.146857	9.57855	9.84e-22	1.53e-20
ALG-1	WBGene00008380	protein_coding_AS	782.188	0.699893	0.0731064	9.57362	1.03e-21	1.6e-20
ALG-1	WBGene00009344	protein_coding_AS	315.237	1.08197	0.113028	9.57253	1.04e-21	1.62e-20
ALG-1	WBGene00013168	protein_coding_AS	1119.85	0.616399	0.064437	9.56592	1.11e-21	1.72e-20
ALG-1	WBGene00000821	protein_coding_AS	3659.37	0.392343	0.0410332	9.56159	1.16e-21	1.8e-20
ALG-1	WBGene00003992	protein_coding_AS	5236.94	0.383831	0.0401713	9.55487	1.24e-21	1.91e-20
ALG-1	WBGene00016765	protein_coding_AS	541.531	0.859444	0.0899806	9.55144	1.28e-21	1.98e-20
ALG-1	WBGene00014997	protein_coding_AS	143.502	1.59269	0.166967	9.53898	1.44e-21	2.23e-20
ALG-1	WBGene00009193	protein_coding_AS	87.757	2.07553	0.217652	9.53603	1.48e-21	2.29e-20
ALG-1	WBGene00014243	protein_coding_AS	1775.82	0.510011	0.0534856	9.53549	1.49e-21	2.3e-20
ALG-1	WBGene00009412	protein_coding_AS	293.65	1.12041	0.117588	9.52828	1.6e-21	2.46e-20
ALG-1	WBGene00006812	protein_coding_AS	144.28	-1.64106	0.172518	-9.51238	1.86e-21	2.87e-20
ALG-1	WBGene00014643	pseudogene_AS	170.54	-1.46643	0.1544	-9.49765	2.15e-21	3.3e-20
ALG-1	WBGene00015988	protein_coding_AS	239.081	1.275	0.13425	9.49719	2.16e-21	3.32e-20
ALG-1	WBGene00010912	protein_coding_AS	2310.2	0.434669	0.045775	9.49577	2.19e-21	3.36e-20
ALG-1	WBGene00168059	piRNA	110.008	-1.94087	0.204408	-9.49509	2.2e-21	3.38e-20
ALG-1	WBGene00022313	protein_coding_AS	313.816	-1.10393	0.116318	-9.49059	2.3e-21	3.52e-20
ALG-1	WBGene00011451	protein_coding_AS	424.223	1.00787	0.106221	9.48843	2.35e-21	3.6e-20
ALG-1	WBGene00013119	protein_coding_AS	89.0008	-2.22661	0.234698	-9.48712	2.37e-21	3.64e-20
ALG-1	WBGene00007395	protein_coding_AS	331.927	1.06441	0.112272	9.48064	2.53e-21	3.87e-20
ALG-1	WBGene00235112	protein_coding_AS	770.955	0.701455	0.0739934	9.47996	2.54e-21	3.89e-20
ALG-1	WBGene00007218	protein_coding_AS	2412.13	0.428662	0.0452187	9.47976	2.55e-21	3.9e-20
ALG-1	WBGene00303011	protein_coding_AS	438.581	-1.14282	0.120567	-9.47877	2.57e-21	3.93e-20
ALG-1	WBGene00007692	protein_coding_AS	178.145	-1.44349	0.152346	-9.47505	2.67e-21	4.07e-20
ALG-1	WBGene00011181	protein_coding_AS	216.89	-1.34329	0.141845	-9.47016	2.79e-21	4.26e-20
ALG-1	WBGene00019086	protein_coding_AS	204.099	1.28684	0.135957	9.46508	2.93e-21	4.47e-20
ALG-1	WBGene00019013	protein_coding_AS	2500.01	0.420418	0.0444235	9.46385	2.97e-21	4.52e-20
ALG-1	WBGene00013685	protein_coding_AS	28681	-0.280891	0.029689	-9.46113	3.05e-21	4.64e-20
ALG-1	WBGene00019087	protein_coding_AS	3505.1	0.416768	0.0440699	9.45696	3.17e-21	4.82e-20
ALG-1	WBGene00011114	protein_coding_AS	149.011	1.56807	0.165957	9.44867	3.43e-21	5.21e-20
ALG-1	WBGene00012442	protein_coding_AS	299.451	-1.15121	0.12185	-9.44774	3.46e-21	5.26e-20
ALG-1	CELE11	dfam_repeats_AS	585.647	-0.775438	0.0821224	-9.44246	3.64e-21	5.52e-20
ALG-1	WBGene00001168	protein_coding_AS	830.103	0.670001	0.0709864	9.43845	3.78e-21	5.74e-20
ALG-1	WBGene00022530	protein_coding_AS	263.109	1.14689	0.12159	9.43249	4e-21	6.07e-20
ALG-1	WBGene00305995	lincRNA_AS	1967.44	-0.541204	0.057378	-9.43226	4.01e-21	6.08e-20
ALG-1	WBGene00050935	pseudogene_AS	5545.62	-0.333993	0.035417	-9.43029	4.09e-21	6.19e-20
ALG-1	WBGene00195344	ncRNA_AS	88.1894	-2.18844	0.232208	-9.42448	4.32e-21	6.53e-20
ALG-1	WBGene00021726	protein_coding_AS	917.994	-0.630079	0.0669433	-9.41213	4.86e-21	7.34e-20
ALG-1	WBGene00219207	protein_coding_AS	9571.14	-0.357519	0.0379927	-9.4102	4.95e-21	7.47e-20
ALG-1	WBGene00011885	protein_coding_AS	1590.37	0.505277	0.0537328	9.40351	5.28e-21	7.96e-20
ALG-1	WBGene00023497	protein_coding_AS	1645.94	-0.535229	0.056963	-9.39609	5.66e-21	8.53e-20
ALG-1	WBGene00020053	protein_coding_AS	161.698	1.46603	0.156173	9.38723	6.16e-21	9.28e-20
ALG-1	WBGene00016312	protein_coding_AS	110.769	1.83548	0.195666	9.38068	6.56e-21	9.86e-20
ALG-1	WBGene00012010	protein_coding_AS	366.071	0.947474	0.101038	9.3774	6.76e-21	1.02e-19
ALG-1	WBGene00001523	protein_coding_AS	528.092	-0.867848	0.0925896	-9.37306	7.05e-21	1.06e-19
ALG-1	WBGene00019167	protein_coding_AS	651.247	-0.735169	0.0784783	-9.36779	7.41e-21	1.11e-19
ALG-1	WBGene00001601	protein_coding_AS	14326.2	0.325321	0.0347302	9.36708	7.46e-21	1.12e-19
ALG-1	WBGene00009247	protein_coding_AS	50706.9	-0.283407	0.0302588	-9.36611	7.53e-21	1.13e-19
ALG-1	WBGene00019190	protein_coding_AS	62.4602	2.54207	0.271451	9.36477	7.62e-21	1.14e-19
ALG-1	WBGene00015026	protein_coding_AS	152.137	1.59679	0.17061	9.35932	8.02e-21	1.2e-19
ALG-1	WBGene00017215	protein_coding_AS	545.982	0.804513	0.0860035	9.35442	8.41e-21	1.26e-19
ALG-1	WBGene00017828	protein_coding_AS	2090.55	-0.48568	0.0519229	-9.35388	8.45e-21	1.26e-19
ALG-1	WBGene00013202	protein_coding_AS	540.086	-0.88109	0.0941993	-9.35346	8.48e-21	1.27e-19
ALG-1	WBGene00007164	protein_coding_AS	1158.82	0.596801	0.0638262	9.35041	8.73e-21	1.3e-19
ALG-1	WBGene00007813	protein_coding_AS	253.386	-1.22437	0.13095	-9.34991	8.77e-21	1.31e-19
ALG-1	WBGene00003124	protein_coding_AS	198.951	-1.39412	0.149213	-9.34314	9.35e-21	1.39e-19
ALG-1	WBGene00006416	protein_coding_AS	89.7833	2.09793	0.224548	9.34293	9.37e-21	1.4e-19
ALG-1	WBGene00049723	piRNA	1598.6	-0.614914	0.0658533	-9.33763	9.85e-21	1.47e-19
ALG-1	WBGene00007856	protein_coding_AS	265.237	1.19807	0.128312	9.33718	9.89e-21	1.47e-19
ALG-1	WBGene00017507	protein_coding_AS	4258.1	-0.354499	0.0379731	-9.33552	1e-20	1.49e-19
ALG-1	WBGene00004245	protein_coding_AS	2058.12	-0.529763	0.0567572	-9.33384	1.02e-20	1.52e-19
ALG-1	WBGene00017372	protein_coding_AS	493.541	-0.85496	0.091618	-9.33178	1.04e-20	1.54e-19
ALG-1	WBGene00011290	protein_coding_AS	98.8504	1.91572	0.205325	9.33021	1.06e-20	1.57e-19
ALG-1	WBGene00021471	protein_coding_AS	204.197	1.33448	0.143062	9.32798	1.08e-20	1.6e-19
ALG-1	WBGene00018622	protein_coding_AS	97.3972	-2.11559	0.226967	-9.32115	1.15e-20	1.7e-19
ALG-1	cel-miR-34-3p	miRNA	264.163	-1.15709	0.124174	-9.3183	1.18e-20	1.75e-19
ALG-1	WBGene00235288	protein_coding_AS	359.344	0.974439	0.104609	9.31508	1.22e-20	1.8e-19
ALG-1	WBGene00012543	protein_coding_AS	3412.61	0.396649	0.0426144	9.30784	1.3e-20	1.93e-19
ALG-1	WBGene00014914	protein_coding_AS	17905.3	-0.286303	0.0307613	-9.30724	1.31e-20	1.94e-19
ALG-1	WBGene00007688	protein_coding_AS	160.831	1.42397	0.153159	9.29732	1.44e-20	2.12e-19
ALG-1	WBGene00013978	protein_coding_AS	116.539	1.74954	0.188262	9.29313	1.5e-20	2.21e-19
ALG-1	WBGene00010728	protein_coding_AS	371.863	1.0122	0.108928	9.29244	1.51e-20	2.22e-19
ALG-1	WBGene00016253	protein_coding_AS	114.237	-1.87959	0.202286	-9.29175	1.52e-20	2.23e-19
ALG-1	WBGene00012030	protein_coding_AS	770.159	0.682551	0.0734692	9.2903	1.54e-20	2.26e-19
ALG-1	WBGene00000197	protein_coding_AS	7228.43	0.33658	0.0362373	9.28824	1.57e-20	2.31e-19
ALG-1	WBGene00000770	protein_coding_AS	697.459	-0.697108	0.0751118	-9.28094	1.68e-20	2.47e-19
ALG-1	WBGene00012158	protein_coding_AS	1099.9	-0.631829	0.0681463	-9.27166	1.83e-20	2.69e-19
ALG-1	WBGene00006512	protein_coding_AS	589.214	0.792859	0.0855165	9.27142	1.84e-20	2.69e-19
ALG-1	cel-miR-241-3p	miRNA	343.78	-1.07041	0.115545	-9.26401	1.97e-20	2.89e-19
ALG-1	WBGene00271819	protein_coding_AS	825.928	0.682637	0.0736886	9.26381	1.97e-20	2.89e-19
ALG-1	WBGene00001607	protein_coding_AS	701.207	0.723475	0.0781117	9.26205	2.01e-20	2.93e-19
ALG-1	WBGene00018625	protein_coding_AS	1659.34	0.478735	0.0517206	9.25618	2.12e-20	3.1e-19
ALG-1	WBGene00013999	protein_coding_AS	1140.07	0.55322	0.059805	9.25041	2.24e-20	3.27e-19
ALG-1	WBGene00016839	protein_coding_AS	240.971	1.27314	0.137702	9.24563	2.34e-20	3.41e-19
ALG-1	WBGene00015931	protein_coding_AS	261.74	1.19069	0.128811	9.24373	2.38e-20	3.47e-19
ALG-1	WBGene00014874	pseudogene_AS	80.5144	-2.25381	0.244005	-9.23676	2.54e-20	3.7e-19
ALG-1	PALTTAA2_CE	dfam_repeats_AS	1049.44	-0.599842	0.0649447	-9.2362	2.55e-20	3.72e-19
ALG-1	WBGene00007082	protein_coding_AS	168.781	1.46533	0.158668	9.23518	2.58e-20	3.75e-19
ALG-1	WBGene00003155	protein_coding_AS	1601.61	0.496724	0.0538264	9.22825	2.75e-20	4e-19
ALG-1	WBGene00021886	pseudogene_AS	313.054	-1.03592	0.112356	-9.22003	2.97e-20	4.32e-19
ALG-1	WBGene00021391	protein_coding_AS	438.757	-0.88103	0.0955696	-9.21873	3.01e-20	4.37e-19
ALG-1	WBGene00007554	protein_coding_AS	857.96	0.654652	0.0710248	9.21722	3.05e-20	4.43e-19
ALG-1	WBGene00002246	protein_coding_AS	143.219	-1.70074	0.184581	-9.21408	3.14e-20	4.55e-19
ALG-1	WBGene00014836	lincRNA_AS	35241.8	-0.301881	0.0327731	-9.21124	3.22e-20	4.67e-19
ALG-1	WBGene00009511	pseudogene_AS	60756.4	-0.261534	0.0283956	-9.21036	3.25e-20	4.71e-19
ALG-1	WBGene00019381	protein_coding_AS	996.321	-0.651806	0.0707882	-9.20783	3.33e-20	4.82e-19
ALG-1	WBGene00019912	pseudogene_AS	92.7597	1.93082	0.20981	9.2027	3.49e-20	5.05e-19
ALG-1	WBGene00000112	protein_coding_AS	937.814	-0.604665	0.0657094	-9.2021	3.51e-20	5.07e-19
ALG-1	WBGene00007047	protein_coding_AS	262.443	-1.12438	0.122202	-9.20098	3.55e-20	5.12e-19
ALG-1	WBGene00013387	protein_coding_AS	952.851	-0.631357	0.0686188	-9.20093	3.55e-20	5.12e-19
ALG-1	WBGene00044670	pseudogene_AS	34861.5	-0.248341	0.0269968	-9.19891	3.62e-20	5.22e-19
ALG-1	WBGene00015989	pseudogene_AS	2963	-0.439966	0.0478317	-9.19821	3.64e-20	5.25e-19
ALG-1	WBGene00044372	protein_coding_AS	55.6277	-3.30849	0.359874	-9.19346	3.8e-20	5.48e-19
ALG-1	WBGene00004188	protein_coding_AS	1709.32	0.476768	0.0518624	9.19293	3.82e-20	5.5e-19
ALG-1	WBGene00015128	protein_coding_AS	264.901	-1.13703	0.123686	-9.19288	3.82e-20	5.5e-19
ALG-1	WBGene00019119	protein_coding_AS	1555.07	0.493098	0.0536394	9.19283	3.83e-20	5.5e-19
ALG-1	WBGene00022709	protein_coding_AS	124.909	1.64978	0.179498	9.1911	3.89e-20	5.59e-19
ALG-1	WBGene00003989	protein_coding_AS	652.819	0.715034	0.0778406	9.18588	4.08e-20	5.86e-19
ALG-1	WBGene00009224	protein_coding_AS	1569.36	-0.485031	0.0528201	-9.18269	4.2e-20	6.03e-19
ALG-1	WBGene00001764	protein_coding_AS	140.26	-1.61575	0.175961	-9.18242	4.22e-20	6.04e-19
ALG-1	WBGene00007977	protein_coding_AS	424.584	0.909056	0.0990594	9.17688	4.44e-20	6.36e-19
ALG-1	WBGene00015830	protein_coding_AS	428.881	0.872934	0.0951637	9.17297	4.6e-20	6.59e-19
ALG-1	WBGene00009683	protein_coding_AS	100.338	1.89048	0.206253	9.16585	4.92e-20	7.03e-19
ALG-1	WBGene00020146	protein_coding_AS	28908.1	-0.288776	0.0315068	-9.16549	4.93e-20	7.05e-19
ALG-1	WBGene00003083	protein_coding_AS	293.366	1.03659	0.1131	9.16528	4.94e-20	7.06e-19
ALG-1	WBGene00017777	protein_coding_AS	719.132	-0.733517	0.0800399	-9.16439	4.98e-20	7.11e-19
ALG-1	WBGene00021460	protein_coding_AS	991.603	0.587161	0.0640909	9.16138	5.12e-20	7.31e-19
ALG-1	WBGene00007017	protein_coding_AS	2643.49	-0.397431	0.0433814	-9.16131	5.13e-20	7.31e-19
ALG-1	WBGene00008110	protein_coding_AS	591.297	-0.844263	0.0921726	-9.15959	5.21e-20	7.42e-19
ALG-1	WBGene00022749	protein_coding_AS	1123.89	-0.596523	0.0651416	-9.15732	5.32e-20	7.57e-19
ALG-1	WBGene00020935	protein_coding_AS	1653.36	0.492654	0.0538004	9.15708	5.33e-20	7.58e-19
ALG-1	WBGene00044197	protein_coding_AS	112.738	-1.89433	0.207249	-9.14035	6.22e-20	8.85e-19
ALG-1	WBGene00003214	protein_coding_AS	4808.27	0.362765	0.0397094	9.13548	6.51e-20	9.25e-19
ALG-1	WBGene00044503	pseudogene_AS	68.5191	-2.51551	0.275447	-9.13246	6.7e-20	9.5e-19
ALG-1	WBGene00016980	protein_coding_AS	224.52	1.22471	0.134122	9.13129	6.77e-20	9.6e-19
ALG-1	WBGene00004389	protein_coding_AS	631.066	0.739254	0.0809892	9.12781	6.99e-20	9.91e-19
ALG-1	WBGene00011804	protein_coding_AS	5159.64	-0.322416	0.0353238	-9.12745	7.01e-20	9.93e-19
ALG-1	WBGene00016208	protein_coding_AS	403.337	-0.896112	0.0981871	-9.12658	7.07e-20	1e-18
ALG-1	WBGene00007445	protein_coding_AS	1080.71	0.568529	0.062315	9.12347	7.28e-20	1.03e-18
ALG-1	WBGene00013236	protein_coding_AS	2124.9	-0.469114	0.0514521	-9.11748	7.69e-20	1.09e-18
ALG-1	WBGene00007042	protein_coding_AS	1442.44	0.558323	0.0612416	9.11672	7.74e-20	1.09e-18
ALG-1	WBGene00008429	protein_coding_AS	1000.17	0.594376	0.0652138	9.11427	7.92e-20	1.12e-18
ALG-1	WBGene00010908	protein_coding_AS	807.201	0.669637	0.0734796	9.11323	8e-20	1.13e-18
ALG-1	WBGene00019586	protein_coding_AS	331.968	0.992514	0.108929	9.11155	8.12e-20	1.14e-18
ALG-1	WBGene00018975	protein_coding_AS	2521.78	0.415013	0.0455485	9.11145	8.13e-20	1.14e-18
ALG-1	WBGene00010406	protein_coding_AS	992.828	0.595923	0.0654038	9.11145	8.13e-20	1.14e-18
ALG-1	WBGene00023519	protein_coding_AS	320.042	1.06227	0.116596	9.11069	8.19e-20	1.15e-18
ALG-1	WBGene00010844	protein_coding_AS	1561.01	0.497154	0.054606	9.10437	8.68e-20	1.22e-18
ALG-1	WBGene00020627	protein_coding_AS	1140.02	0.551695	0.0606154	9.10157	8.9e-20	1.25e-18
ALG-1	WBGene00023451	protein_coding_AS	1147.63	0.551001	0.060567	9.09738	9.25e-20	1.3e-18
ALG-1	WBGene00021018	pseudogene_AS	7301.44	-0.321375	0.0353351	-9.09506	9.45e-20	1.33e-18
ALG-1	WBGene00012379	protein_coding_AS	171.794	1.38239	0.152118	9.08764	1.01e-19	1.42e-18
ALG-1	WBGene00000812	protein_coding_AS	701.408	-0.701114	0.0772265	-9.07867	1.1e-19	1.54e-18
ALG-1	WBGene00013736	protein_coding_AS	2044.03	-0.466987	0.0514403	-9.07824	1.1e-19	1.54e-18
ALG-1	WBGene00016931	protein_coding_AS	208.802	-1.35869	0.149737	-9.07384	1.15e-19	1.61e-18
ALG-1	WBGene00015817	protein_coding_AS	8956.01	0.32771	0.0361181	9.07329	1.15e-19	1.61e-18
ALG-1	WBGene00206415	protein_coding_AS	31080.6	-0.267701	0.0295045	-9.07324	1.16e-19	1.61e-18
ALG-1	WBGene00003596	protein_coding_AS	1353.23	0.538362	0.0593458	9.0716	1.17e-19	1.64e-18
ALG-1	WBGene00004208	protein_coding_AS	889.625	0.652668	0.0719722	9.06833	1.21e-19	1.69e-18
ALG-1	WBGene00001513	protein_coding_AS	1748.82	0.465082	0.0512876	9.06812	1.21e-19	1.69e-18
ALG-1	WBGene00021486	protein_coding_AS	747.342	0.686952	0.0757894	9.06396	1.26e-19	1.75e-18
ALG-1	WBGene00011191	protein_coding_AS	108.397	1.75429	0.193634	9.05983	1.31e-19	1.82e-18
ALG-1	WBGene00195169	protein_coding_AS	1230.34	-0.566528	0.0625387	-9.05884	1.32e-19	1.83e-18
ALG-1	WBGene00013304	protein_coding_AS	218.256	1.23649	0.13653	9.05653	1.35e-19	1.87e-18
ALG-1	WBGene00020966	protein_coding_AS	114.407	1.68244	0.185783	9.05595	1.35e-19	1.88e-18
ALG-1	WBGene00012342	protein_coding_AS	1202.98	0.539592	0.0595964	9.05411	1.38e-19	1.91e-18
ALG-1	WBGene00015206	protein_coding_AS	763.342	-0.699758	0.0772966	-9.05289	1.39e-19	1.93e-18
ALG-1	WBGene00009404	protein_coding_AS	296.717	1.05976	0.117074	9.05204	1.4e-19	1.94e-18
ALG-1	WBGene00012564	protein_coding_AS	1319.56	-0.552456	0.0610718	-9.04601	1.48e-19	2.05e-18
ALG-1	WBGene00008165	protein_coding_AS	417.419	-0.891452	0.0986594	-9.03565	1.63e-19	2.26e-18
ALG-1	WBGene00019541	protein_coding_AS	13758.8	-0.339356	0.0375703	-9.03257	1.68e-19	2.32e-18
ALG-1	WBGene00015994	protein_coding_AS	485.773	0.800874	0.0886969	9.02934	1.73e-19	2.39e-18
ALG-1	WBGene00000898	protein_coding_AS	1392.7	-0.587985	0.0651195	-9.02931	1.73e-19	2.39e-18
ALG-1	(GAT)n	dfam_repeats_AS	2013.76	-0.453142	0.0502237	-9.02248	1.84e-19	2.54e-18
ALG-1	WBGene00015089	protein_coding_AS	272.864	1.07364	0.119091	9.01525	1.96e-19	2.71e-18
ALG-1	WBGene00021192	protein_coding_AS	4660.15	0.382282	0.0424104	9.01386	1.99e-19	2.74e-18
ALG-1	CELE12A	dfam_repeats_AS	3320.99	-0.385874	0.0428171	-9.01214	2.02e-19	2.78e-18
ALG-1	cel-miR-357-3p	miRNA	215.278	-1.30573	0.144973	-9.00674	2.12e-19	2.92e-18
ALG-1	WBGene00206377	protein_coding_AS	935.391	0.598664	0.0664686	9.00672	2.12e-19	2.92e-18
ALG-1	WBGene00000902	protein_coding_AS	98.5191	-1.9246	0.213855	-8.99952	2.27e-19	3.12e-18
ALG-1	WBGene00018094	protein_coding_AS	79.5096	-2.37395	0.264321	-8.98133	2.68e-19	3.68e-18
ALG-1	WBGene00018232	protein_coding_AS	338.744	0.96693	0.107671	8.98044	2.7e-19	3.7e-18
ALG-1	WBGene00009993	protein_coding_AS	1371.44	0.521549	0.0580921	8.97796	2.76e-19	3.78e-18
ALG-1	WBGene00007419	protein_coding_AS	150.855	1.46498	0.163216	8.97573	2.81e-19	3.86e-18
ALG-1	WBGene00006062	protein_coding_AS	243.823	-1.14901	0.128028	-8.97463	2.84e-19	3.9e-18
ALG-1	cel-miR-230-3p	miRNA	517.713	-1.83359	0.204528	-8.965	3.1e-19	4.25e-18
ALG-1	WBGene00021945	protein_coding_AS	1447.88	0.506472	0.0565051	8.9633	3.15e-19	4.31e-18
ALG-1	WBGene00011757	protein_coding_AS	536.693	0.750049	0.0836983	8.96134	3.21e-19	4.39e-18
ALG-1	WBGene00003041	protein_coding_AS	1342.98	0.522128	0.0582917	8.95716	3.33e-19	4.55e-18
ALG-1	WBGene00010940	protein_coding_AS	1607.58	-0.500187	0.055865	-8.9535	3.44e-19	4.7e-18
ALG-1	WBGene00012632	protein_coding_AS	70.5855	-2.45431	0.274195	-8.95098	3.52e-19	4.81e-18
ALG-1	WBGene00015041	protein_coding_AS	139.057	1.49077	0.166572	8.94972	3.56e-19	4.86e-18
ALG-1	WBGene00008328	pseudogene_AS	106.496	-1.92108	0.214688	-8.94825	3.61e-19	4.92e-18
ALG-1	WBGene00013225	protein_coding_AS	501.09	-0.826802	0.092413	-8.94681	3.66e-19	4.98e-18
ALG-1	WBGene00007784	protein_coding_AS	1793.64	0.47113	0.052782	8.92596	4.42e-19	6.01e-18
ALG-1	WBGene00271642	ncRNA_AS	190.146	-1.29954	0.14563	-8.92362	4.51e-19	6.14e-18
ALG-1	WBGene00021977	protein_coding_AS	242.476	-1.16633	0.130705	-8.92336	4.52e-19	6.15e-18
ALG-1	WBGene00013510	pseudogene_AS	181.177	-1.37775	0.154525	-8.91604	4.83e-19	6.56e-18
ALG-1	WBGene00003119	protein_coding_AS	1423.88	0.520558	0.0584636	8.90397	5.39e-19	7.31e-18
ALG-1	WBGene00022037	protein_coding_AS	636.656	0.73432	0.0824719	8.90388	5.39e-19	7.31e-18
ALG-1	WBGene00019624	protein_coding_AS	64.5307	-2.50701	0.28169	-8.8999	5.59e-19	7.58e-18
ALG-1	WBGene00010876	protein_coding_AS	283.021	1.22907	0.138197	8.89365	5.91e-19	8.01e-18
ALG-1	WBGene00022638	protein_coding_AS	58.0122	-2.85327	0.320839	-8.89313	5.94e-19	8.04e-18
ALG-1	WBGene00020353	protein_coding_AS	157.799	1.41842	0.159529	8.89131	6.04e-19	8.17e-18
ALG-1	WBGene00044675	protein_coding_AS	117.389	-1.76743	0.198808	-8.89017	6.1e-19	8.25e-18
ALG-1	WBGene00011120	protein_coding_AS	134.61	1.81208	0.203904	8.88693	6.28e-19	8.49e-18
ALG-1	WBGene00018866	protein_coding_AS	2260.32	0.430546	0.0485286	8.87199	7.18e-19	9.7e-18
ALG-1	WBGene00008651	protein_coding_AS	90.9507	1.86725	0.210546	8.86865	7.4e-19	9.99e-18
ALG-1	WBGene00271598	pseudogene_AS	1094.38	-0.571792	0.0645255	-8.86149	7.9e-19	1.06e-17
ALG-1	WBGene00045302	protein_coding_AS	52.8848	-2.98947	0.337418	-8.85983	8.01e-19	1.08e-17
ALG-1	WBGene00007900	protein_coding_AS	386.471	-0.934885	0.105533	-8.85868	8.1e-19	1.09e-17
ALG-1	WBGene00017890	protein_coding_AS	1810.18	-0.45221	0.051059	-8.85661	8.25e-19	1.11e-17
ALG-1	WBGene00000227	protein_coding_AS	3219.73	0.402152	0.0454251	8.85307	8.51e-19	1.14e-17
ALG-1	WBGene00012639	protein_coding_AS	70.0284	-2.3667	0.267372	-8.85171	8.62e-19	1.16e-17
ALG-1	WBGene00000938	protein_coding_AS	1099.66	-0.612505	0.0692028	-8.85088	8.68e-19	1.17e-17
ALG-1	WBGene00018137	protein_coding_AS	847.936	-0.610141	0.0689461	-8.84954	8.79e-19	1.18e-17
ALG-1	WBGene00011333	protein_coding_AS	8102.84	0.355766	0.0402478	8.83941	9.62e-19	1.29e-17
ALG-1	WBGene00010634	protein_coding_AS	164.074	1.46134	0.165403	8.83506	1e-18	1.34e-17
ALG-1	WBGene00016946	protein_coding_AS	149.835	1.45894	0.165156	8.83374	1.01e-18	1.36e-17
ALG-1	WBGene00014888	pseudogene_AS	1220.25	-0.52115	0.0590686	-8.82278	1.12e-18	1.49e-17
ALG-1	WBGene00019216	protein_coding_AS	249.116	1.11276	0.126129	8.82241	1.12e-18	1.5e-17
ALG-1	WBGene00007948	protein_coding_AS	140.376	1.47061	0.166747	8.81942	1.15e-18	1.54e-17
ALG-1	WBGene00001087	protein_coding_AS	1252.28	0.523888	0.0594036	8.81914	1.15e-18	1.54e-17
ALG-1	WBGene00000817	protein_coding_AS	692.888	0.659486	0.0748052	8.81605	1.19e-18	1.58e-17
ALG-1	WBGene00022085	pseudogene_AS	162.517	1.47634	0.167505	8.81372	1.21e-18	1.61e-17
ALG-1	WBGene00011639	protein_coding_AS	752.282	-0.660918	0.0750597	-8.80523	1.31e-18	1.74e-17
ALG-1	WBGene00003415	protein_coding_AS	1056.13	0.551325	0.0626227	8.80392	1.32e-18	1.76e-17
ALG-1	WBGene00018926	protein_coding_AS	155.603	1.45273	0.16501	8.80391	1.32e-18	1.76e-17
ALG-1	WBGene00007446	protein_coding_AS	229.113	1.17496	0.133467	8.80336	1.33e-18	1.77e-17
ALG-1	WBGene00001325	protein_coding_AS	178.059	-1.43786	0.163433	-8.79791	1.39e-18	1.85e-17
ALG-1	WBGene00008527	protein_coding_AS	221.987	-1.21761	0.138456	-8.79418	1.44e-18	1.91e-17
ALG-1	WBGene00020352	pseudogene_AS	3214	0.435336	0.0495285	8.78962	1.5e-18	1.99e-17
ALG-1	WBGene00022145	protein_coding_AS	185.903	-1.29464	0.14738	-8.78439	1.57e-18	2.09e-17
ALG-1	WBGene00002047	protein_coding_AS	10332.8	0.323649	0.0368549	8.78171	1.61e-18	2.14e-17
ALG-1	WBGene00001599	protein_coding_AS	1052.22	0.578627	0.0659063	8.77954	1.64e-18	2.18e-17
ALG-1	WBGene00006780	protein_coding_AS	181.98	-1.37914	0.157164	-8.77519	1.71e-18	2.26e-17
ALG-1	WBGene00013623	protein_coding_AS	156.18	-1.47895	0.168576	-8.77317	1.74e-18	2.3e-17
ALG-1	WBGene00022069	protein_coding_AS	7548.33	0.350325	0.0399416	8.77093	1.77e-18	2.34e-17
ALG-1	WBGene00015137	protein_coding_AS	85.1972	-2.0287	0.231303	-8.77076	1.77e-18	2.35e-17
ALG-1	WBGene00044154	protein_coding_AS	6243.58	-0.326733	0.0372584	-8.76937	1.8e-18	2.37e-17
ALG-1	WBGene00017401	protein_coding_AS	238.127	1.1325	0.129166	8.76775	1.82e-18	2.41e-17
ALG-1	WBGene00003926	protein_coding_AS	1255.94	0.530118	0.060482	8.7649	1.87e-18	2.47e-17
ALG-1	WBGene00002855	protein_coding_AS	429.742	0.863744	0.0985564	8.76396	1.89e-18	2.49e-17
ALG-1	WBGene00011679	protein_coding_AS	74.9675	2.11637	0.241576	8.76067	1.94e-18	2.56e-17
ALG-1	WBGene00010353	protein_coding_AS	2362.87	0.425043	0.04853	8.75835	1.98e-18	2.61e-17
ALG-1	WBGene00001178	protein_coding_AS	273.378	-1.07423	0.122948	-8.73727	2.39e-18	3.14e-17
ALG-1	WBGene00018579	protein_coding_AS	148.803	-1.44439	0.165359	-8.73488	2.44e-18	3.21e-17
ALG-1	WBGene00013434	protein_coding_AS	982.016	0.592738	0.0679047	8.72896	2.57e-18	3.38e-17
ALG-1	WBGene00016741	protein_coding_AS	419.84	0.838721	0.0960989	8.72769	2.6e-18	3.41e-17
ALG-1	WBGene00009922	protein_coding_AS	3103.19	0.365877	0.0419246	8.72703	2.61e-18	3.43e-17
ALG-1	WBGene00219736	lincRNA_AS	473.601	-0.814059	0.0933144	-8.72383	2.69e-18	3.53e-17
ALG-1	WBGene00014102	protein_coding_AS	118.331	1.60392	0.18392	8.72076	2.76e-18	3.62e-17
ALG-1	WBGene00004259	protein_coding_AS	346.471	-0.944102	0.108312	-8.71648	2.87e-18	3.76e-17
ALG-1	WBGene00015163	protein_coding_AS	130.568	-1.59452	0.183099	-8.70852	3.08e-18	4.03e-17
ALG-1	WBGene00219722	lincRNA_AS	896.991	-0.603326	0.0693206	-8.70341	3.22e-18	4.21e-17
ALG-1	WBGene00001684	protein_coding_AS	205.581	-1.21343	0.139482	-8.69953	3.33e-18	4.36e-17
ALG-1	WBGene00019940	protein_coding_AS	1832.5	0.442237	0.0509313	8.68301	3.85e-18	5.04e-17
ALG-1	WBGene00001680	protein_coding_AS	290.608	-1.02701	0.11835	-8.6777	4.04e-18	5.27e-17
ALG-1	WBGene00019433	protein_coding_AS	545.621	0.755908	0.0871161	8.67702	4.06e-18	5.3e-17
ALG-1	WBGene00219455	protein_coding_AS	414.266	-0.867755	0.100049	-8.67326	4.2e-18	5.48e-17
ALG-1	WBGene00022021	protein_coding_AS	1273.53	0.528236	0.0609527	8.66631	4.46e-18	5.82e-17
ALG-1	WBGene00022951	ncRNA_AS	1482.15	-0.485567	0.0560334	-8.66567	4.49e-18	5.85e-17
ALG-1	cel-miR-1830-3p	miRNA	124.88	-1.58096	0.182459	-8.66472	4.53e-18	5.89e-17
ALG-1	WBGene00019875	protein_coding_AS	128.809	-1.63479	0.188683	-8.66421	4.55e-18	5.91e-17
ALG-1	WBGene00019577	protein_coding_AS	444.797	0.804624	0.0929253	8.65883	4.77e-18	6.19e-17
ALG-1	WBGene00018436	protein_coding_AS	82.7658	-2.07165	0.239368	-8.65465	4.94e-18	6.42e-17
ALG-1	WBGene00022221	protein_coding_AS	1374.46	-0.503433	0.0581794	-8.65311	5.01e-18	6.51e-17
ALG-1	WBGene00000874	protein_coding_AS	2223.32	0.424625	0.0491329	8.64238	5.51e-18	7.14e-17
ALG-1	WBGene00019783	protein_coding_AS	139.609	1.43106	0.165705	8.63622	5.81e-18	7.53e-17
ALG-1	WBGene00020100	protein_coding_AS	1889.51	0.44669	0.0517245	8.63595	5.82e-18	7.55e-17
ALG-1	WBGene00007966	protein_coding_AS	12232	-0.293213	0.0339775	-8.62961	6.16e-18	7.97e-17
ALG-1	WBGene00009605	protein_coding_AS	317.212	0.977958	0.113416	8.62273	6.54e-18	8.45e-17
ALG-1	WBGene00008383	protein_coding_AS	340.535	0.959097	0.111229	8.62271	6.54e-18	8.45e-17
ALG-1	WBGene00010265	protein_coding_AS	269.115	1.1025	0.127869	8.62212	6.57e-18	8.49e-17
ALG-1	WBGene00049340	piRNA	532.438	-0.797567	0.0925157	-8.62089	6.64e-18	8.58e-17
ALG-1	WBGene00013033	protein_coding_AS	411.05	0.846183	0.0981928	8.61757	6.84e-18	8.83e-17
ALG-1	WBGene00020207	protein_coding_AS	224.456	-1.21416	0.140896	-8.61742	6.85e-18	8.83e-17
ALG-1	WBGene00235359	protein_coding_AS	488.469	0.766359	0.0889771	8.613	7.12e-18	9.17e-17
ALG-1	WBGene00017280	protein_coding_AS	1774.55	-0.452592	0.0525631	-8.61045	7.28e-18	9.37e-17
ALG-1	WBGene00010037	protein_coding_AS	2433.76	0.410773	0.0477203	8.60792	7.44e-18	9.58e-17
ALG-1	WBGene00006605	protein_coding_AS	577.798	-0.72351	0.0840929	-8.6037	7.72e-18	9.93e-17
ALG-1	WBGene00219728	lincRNA_AS	2187.45	0.409711	0.0476625	8.59609	8.25e-18	1.06e-16
ALG-1	WBGene00086555	protein_coding_AS	567.08	-0.741086	0.0863266	-8.58468	9.11e-18	1.17e-16
ALG-1	WBGene00003800	protein_coding_AS	1360.01	0.505807	0.0589383	8.58197	9.33e-18	1.2e-16
ALG-1	WBGene00012754	protein_coding_AS	112.032	1.6247	0.189328	8.58141	9.37e-18	1.2e-16
ALG-1	WBGene00012721	protein_coding_AS	332.796	0.90876	0.105907	8.58069	9.43e-18	1.21e-16
ALG-1	WBGene00021650	protein_coding_AS	272.12	1.06432	0.124059	8.57917	9.56e-18	1.22e-16
ALG-1	WBGene00022707	protein_coding_AS	65.7182	2.17247	0.253361	8.57461	9.94e-18	1.27e-16
ALG-1	CELE1	dfam_repeats_AS	7973.24	-0.289905	0.0338182	-8.57243	1.01e-17	1.3e-16
ALG-1	WBGene00016125	protein_coding_AS	193.738	1.19057	0.139378	8.54202	1.32e-17	1.69e-16
ALG-1	WBGene00012148	protein_coding_AS	3077.61	-0.396841	0.0464589	-8.54177	1.32e-17	1.69e-16
ALG-1	WBGene00010679	protein_coding_AS	224.661	1.13097	0.132503	8.53544	1.4e-17	1.78e-16
ALG-1	WBGene00021697	protein_coding_AS	2839.92	0.38318	0.0449003	8.53401	1.41e-17	1.8e-16
ALG-1	WBGene00004958	protein_coding_AS	107.022	1.71847	0.201481	8.5292	1.47e-17	1.88e-16
ALG-1	WBGene00044436	protein_coding_AS	2064.86	-0.43969	0.0515714	-8.52585	1.52e-17	1.93e-16
ALG-1	WBGene00003011	protein_coding_AS	200.462	-1.25725	0.14758	-8.51912	1.61e-17	2.05e-16
ALG-1	WBGene00014123	protein_coding_AS	885.528	0.621507	0.0729598	8.51849	1.62e-17	2.06e-16
ALG-1	WBGene00001839	protein_coding_AS	72.02	2.11114	0.247844	8.51803	1.62e-17	2.07e-16
ALG-1	WBGene00018659	protein_coding_AS	530.437	-0.756739	0.0888934	-8.51288	1.7e-17	2.16e-16
ALG-1	WBGene00001284	protein_coding_AS	2131.3	0.403557	0.0474381	8.50702	1.78e-17	2.27e-16
ALG-1	WBGene00012926	protein_coding_AS	363.614	0.920428	0.108208	8.50609	1.8e-17	2.29e-16
ALG-1	WBGene00007050	protein_coding_AS	2025.87	0.437208	0.0514007	8.50587	1.8e-17	2.29e-16
ALG-1	WBGene00017605	protein_coding_AS	1147.65	0.527827	0.0621003	8.4996	1.9e-17	2.41e-16
ALG-1	WBGene00011696	protein_coding_AS	3695.8	0.348436	0.0410154	8.49525	1.98e-17	2.5e-16
ALG-1	WBGene00012014	protein_coding_AS	292.389	-0.97419	0.114694	-8.49384	2e-17	2.53e-16
ALG-1	Vingi-1_CE	dfam_repeats_AS	4215.12	0.326236	0.0384152	8.49237	2.02e-17	2.56e-16
ALG-1	WBGene00003550	protein_coding_AS	105.133	1.71468	0.201928	8.49154	2.04e-17	2.58e-16
ALG-1	WBGene00022192	protein_coding_AS	423.415	0.863225	0.101693	8.48852	2.09e-17	2.65e-16
ALG-1	WBGene00206390	protein_coding_AS	444.237	-0.820453	0.0967251	-8.48231	2.21e-17	2.79e-16
ALG-1	WBGene00005387	protein_coding_AS	512.266	-0.74016	0.0872643	-8.48183	2.22e-17	2.8e-16
ALG-1	WBGene00006714	protein_coding_AS	2750.46	-0.366934	0.0432721	-8.47969	2.26e-17	2.85e-16
ALG-1	WBGene00012570	protein_coding_AS	378.372	0.866735	0.102222	8.47891	2.27e-17	2.87e-16
ALG-1	WBGene00018851	protein_coding_AS	11162.2	-0.273449	0.0322542	-8.47795	2.29e-17	2.89e-16
ALG-1	WBGene00015083	protein_coding_AS	814.05	0.642983	0.0758738	8.47437	2.36e-17	2.98e-16
ALG-1	cel-miR-49-5p	miRNA	123.382	-1.55598	0.183669	-8.47164	2.42e-17	3.05e-16
ALG-1	WBGene00012552	protein_coding_AS	2173.46	-0.446965	0.052768	-8.47038	2.45e-17	3.08e-16
ALG-1	WBGene00016140	protein_coding_AS	2303.36	0.387685	0.0457762	8.46913	2.47e-17	3.11e-16
ALG-1	WBGene00012912	protein_coding_AS	128.24	1.50455	0.177668	8.46835	2.49e-17	3.13e-16
ALG-1	WBGene00003834	protein_coding_AS	1968.28	0.404317	0.047753	8.46684	2.52e-17	3.17e-16
ALG-1	WBGene00013509	protein_coding_AS	267.449	-1.02527	0.121158	-8.46224	2.62e-17	3.29e-16
ALG-1	WBGene00001016	protein_coding_AS	1509.4	0.466325	0.0551088	8.4619	2.63e-17	3.3e-16
ALG-1	WBGene00004256	protein_coding_AS	273.143	-1.00588	0.118915	-8.45882	2.7e-17	3.39e-16
ALG-1	WBGene00009477	protein_coding_AS	1193.69	0.534394	0.0631772	8.45866	2.7e-17	3.39e-16
ALG-1	WBGene00013923	protein_coding_AS	94.4222	1.81535	0.214717	8.45464	2.8e-17	3.51e-16
ALG-1	WBGene00001648	protein_coding_AS	473.685	0.806533	0.0954007	8.45416	2.81e-17	3.52e-16
ALG-1	WBGene00002250	protein_coding_AS	601.607	0.710394	0.0840987	8.44715	2.99e-17	3.73e-16
ALG-1	WBGene00011467	protein_coding_AS	82.658	1.94135	0.229864	8.44564	3.02e-17	3.78e-16
ALG-1	WBGene00018525	protein_coding_AS	143.563	1.38206	0.163693	8.44299	3.09e-17	3.86e-16
ALG-1	WBGene00018530	protein_coding_AS	143.563	1.38206	0.163693	8.44299	3.09e-17	3.86e-16
ALG-1	WBGene00012689	protein_coding_AS	132.575	1.42336	0.168667	8.43885	3.2e-17	4e-16
ALG-1	WBGene00018617	protein_coding_AS	290.174	-1.01165	0.119909	-8.4368	3.26e-17	4.07e-16
ALG-1	LONGPAL1	dfam_repeats_AS	242.847	-1.09414	0.129708	-8.43537	3.3e-17	4.11e-16
ALG-1	WBGene00012624	protein_coding_AS	3693.46	-0.369575	0.0438348	-8.43108	3.42e-17	4.26e-16
ALG-1	WBGene00010992	protein_coding_AS	105.886	1.68429	0.199909	8.4253	3.6e-17	4.48e-16
ALG-1	WBGene00009656	pseudogene_AS	1994.31	-0.456564	0.0541979	-8.42402	3.64e-17	4.52e-16
ALG-1	WBGene00002208	protein_coding_AS	316.222	0.950334	0.112827	8.42291	3.67e-17	4.56e-16
ALG-1	WBGene00018928	protein_coding_AS	182.788	-1.32932	0.157864	-8.42062	3.75e-17	4.65e-16
ALG-1	WBGene00011322	protein_coding_AS	261.549	1.03221	0.122602	8.41914	3.79e-17	4.71e-16
ALG-1	WBGene00013153	pseudogene_AS	1411.56	-0.47258	0.056137	-8.41834	3.82e-17	4.74e-16
ALG-1	WBGene00022634	protein_coding_AS	301.63	0.992087	0.117904	8.41433	3.95e-17	4.9e-16
ALG-1	WBGene00007564	protein_coding_AS	1100.74	0.523265	0.0622054	8.41188	4.03e-17	5e-16
ALG-1	WBGene00009442	protein_coding_AS	941.131	-0.578254	0.0687579	-8.41	4.1e-17	5.08e-16
ALG-1	WBGene00016378	protein_coding_AS	860.461	-0.581086	0.0691595	-8.40212	4.39e-17	5.43e-16
ALG-1	WBGene00022416	protein_coding_AS	107.869	-1.72579	0.205406	-8.40183	4.4e-17	5.44e-16
ALG-1	WBGene00018458	protein_coding_AS	55.2771	-2.58344	0.30772	-8.39542	4.64e-17	5.74e-16
ALG-1	WBGene00017895	protein_coding_AS	1141.84	0.551104	0.0656515	8.3944	4.68e-17	5.79e-16
ALG-1	WBGene00007307	protein_coding_AS	1924.53	0.483154	0.0575599	8.39393	4.7e-17	5.8e-16
ALG-1	WBGene00044633	protein_coding_AS	138.096	1.38595	0.165132	8.39295	4.74e-17	5.85e-16
ALG-1	WBGene00007769	protein_coding_AS	187.712	-1.21427	0.144739	-8.38936	4.89e-17	6.03e-16
ALG-1	WBGene00012871	protein_coding_AS	195.522	1.20701	0.143885	8.38869	4.92e-17	6.06e-16
ALG-1	WBGene00021000	protein_coding_AS	689.585	-0.678701	0.0809472	-8.38449	5.09e-17	6.27e-16
ALG-1	WBGene00000500	protein_coding_AS	535.137	-0.718751	0.0857588	-8.38107	5.24e-17	6.46e-16
ALG-1	WBGene00019159	pseudogene_AS	307.283	0.991329	0.118302	8.37967	5.31e-17	6.53e-16
ALG-1	WBGene00015894	protein_coding_AS	69.2481	-2.25755	0.269507	-8.37659	5.45e-17	6.7e-16
ALG-1	WBGene00016415	protein_coding_AS	228.42	1.09379	0.130668	8.37076	5.72e-17	7.03e-16
ALG-1	WBGene00008125	protein_coding_AS	332.039	0.900014	0.107564	8.36722	5.9e-17	7.24e-16
ALG-1	WBGene00194788	protein_coding_AS	260.542	1.0267	0.122709	8.36689	5.92e-17	7.26e-16
ALG-1	WBGene00002075	protein_coding_AS	1155.23	0.534909	0.0639601	8.36316	6.11e-17	7.49e-16
ALG-1	WBGene00235294	protein_coding_AS	81.6544	1.87442	0.224159	8.36198	6.17e-17	7.56e-16
ALG-1	WBGene00020463	protein_coding_AS	7555.68	0.282245	0.0337611	8.36006	6.27e-17	7.68e-16
ALG-1	WBGene00009129	protein_coding_AS	114.369	1.60451	0.191976	8.35787	6.39e-17	7.82e-16
ALG-1	WBGene00010336	protein_coding_AS	111.221	-1.66513	0.199343	-8.3531	6.65e-17	8.14e-16
ALG-1	WBGene00009304	protein_coding_AS	116.592	1.5382	0.184175	8.35182	6.72e-17	8.22e-16
ALG-1	WBGene00000730	protein_coding_AS	2868.93	-0.361767	0.0433858	-8.33836	7.53e-17	9.2e-16
ALG-1	WBGene00195060	lincRNA_AS	406.321	0.848655	0.101794	8.337	7.62e-17	9.31e-16
ALG-1	WBGene00019513	protein_coding_AS	344.382	-0.907569	0.108866	-8.33659	7.65e-17	9.33e-16
ALG-1	WBGene00011142	protein_coding_AS	1049.76	0.523578	0.0628089	8.33605	7.68e-17	9.37e-16
ALG-1	WBGene00017435	protein_coding_AS	1352.39	0.483127	0.0579986	8.32998	8.09e-17	9.86e-16
ALG-1	WBGene00004679	protein_coding_AS	345.743	0.871016	0.104587	8.32817	8.21e-17	1e-15
ALG-1	WBGene00194955	protein_coding_AS	1396.09	-0.474206	0.0569485	-8.32693	8.3e-17	1.01e-15
ALG-1	WBGene00007150	protein_coding_AS	563.197	0.709973	0.0853267	8.32065	8.75e-17	1.06e-15
ALG-1	WBGene00007248	protein_coding_AS	220.325	1.09534	0.131652	8.31998	8.8e-17	1.07e-15
ALG-1	WBGene00002368	protein_coding_AS	4353.52	0.349018	0.04195	8.31985	8.81e-17	1.07e-15
ALG-1	WBGene00009801	protein_coding_AS	413.281	-0.804473	0.0967238	-8.31721	9.01e-17	1.09e-15
ALG-1	WBGene00007059	protein_coding_AS	248.469	1.04949	0.126255	8.31246	9.37e-17	1.14e-15
ALG-1	WBGene00007816	protein_coding_AS	90.4528	-1.81949	0.218913	-8.31148	9.45e-17	1.15e-15
ALG-1	WBGene00006409	protein_coding_AS	181.221	1.21037	0.145672	8.30888	9.66e-17	1.17e-15
ALG-1	WBGene00001785	protein_coding_AS	130.589	1.46692	0.176655	8.30387	1.01e-16	1.22e-15
ALG-1	WBGene00020170	protein_coding_AS	190.863	-1.18231	0.142398	-8.30284	1.02e-16	1.23e-15
ALG-1	WBGene00007081	protein_coding_AS	302.382	0.938214	0.113028	8.30073	1.03e-16	1.25e-15
ALG-1	WBGene00003134	protein_coding_AS	1193.2	0.493004	0.0593983	8.29997	1.04e-16	1.26e-15
ALG-1	WBGene00014884	pseudogene_AS	50722	-0.234586	0.0282644	-8.2997	1.04e-16	1.26e-15
ALG-1	WBGene00004391	protein_coding_AS	566.74	0.681055	0.082076	8.29786	1.06e-16	1.28e-15
ALG-1	WBGene00008183	protein_coding_AS	1490.33	0.452305	0.0545239	8.29554	1.08e-16	1.31e-15
ALG-1	WBGene00019434	protein_coding_AS	1683	0.445637	0.0537567	8.28989	1.13e-16	1.37e-15
ALG-1	WBGene00044443	protein_coding_AS	238.482	-1.12995	0.136334	-8.28814	1.15e-16	1.39e-15
ALG-1	WBGene00008912	protein_coding_AS	139.414	1.45413	0.175464	8.28735	1.16e-16	1.4e-15
ALG-1	WBGene00014085	protein_coding_AS	170.853	1.30502	0.157498	8.28599	1.17e-16	1.41e-15
ALG-1	WBGene00002034	protein_coding_AS	3516.5	0.338486	0.0408557	8.28491	1.18e-16	1.42e-15
ALG-1	cel-miR-1819-3p	miRNA	61.5269	-2.54942	0.307867	-8.28091	1.22e-16	1.47e-15
ALG-1	WBGene00043534	protein_coding_AS	2640.98	0.372715	0.0450101	8.28069	1.22e-16	1.47e-15
ALG-1	WBGene00004922	protein_coding_AS	120.476	-1.56869	0.189493	-8.27836	1.25e-16	1.5e-15
ALG-1	WBGene00016286	protein_coding_AS	129.601	1.43859	0.173892	8.27287	1.31e-16	1.57e-15
ALG-1	WBGene00022722	protein_coding_AS	913.132	0.587711	0.0710651	8.27003	1.34e-16	1.61e-15
ALG-1	WBGene00017833	protein_coding_AS	104.308	1.58999	0.19228	8.26914	1.35e-16	1.62e-15
ALG-1	WBGene00018909	protein_coding_AS	661.516	-0.65655	0.0794597	-8.26268	1.42e-16	1.71e-15
ALG-1	TC5B	dfam_repeats_AS	405.825	-0.864148	0.104604	-8.26117	1.44e-16	1.73e-15
ALG-1	WBGene00015012	protein_coding_AS	43925.3	-0.240703	0.0291381	-8.26075	1.45e-16	1.73e-15
ALG-1	WBGene00020486	protein_coding_AS	2654.91	-0.382612	0.04633	-8.25841	1.48e-16	1.77e-15
ALG-1	WBGene00004955	protein_coding_AS	5690.08	0.319358	0.0386802	8.25636	1.5e-16	1.8e-15
ALG-1	cel-miR-61-3p	miRNA	29730.5	-0.581278	0.0704187	-8.25459	1.52e-16	1.82e-15
ALG-1	WBGene00011507	protein_coding_AS	2770.92	0.373543	0.045259	8.25345	1.54e-16	1.84e-15
ALG-1	WBGene00001688	protein_coding_AS	3791.69	0.326568	0.039575	8.25188	1.56e-16	1.86e-15
ALG-1	WBGene00001427	protein_coding_AS	2014.74	0.447442	0.0542414	8.24909	1.6e-16	1.9e-15
ALG-1	WBGene00000535	protein_coding_AS	161.904	-1.32063	0.160168	-8.24529	1.65e-16	1.96e-15
ALG-1	WBGene00010871	protein_coding_AS	101.866	1.68502	0.204382	8.24446	1.66e-16	1.98e-15
ALG-1	WBGene00013345	protein_coding_AS	934.607	-0.558895	0.0678365	-8.23885	1.74e-16	2.07e-15
ALG-1	WBGene00018892	protein_coding_AS	1539.04	0.510759	0.0620052	8.23737	1.76e-16	2.1e-15
ALG-1	WBGene00017213	protein_coding_AS	159.702	1.36106	0.16531	8.23336	1.82e-16	2.17e-15
ALG-1	WBGene00011464	protein_coding_AS	1613.71	0.440378	0.0534987	8.23157	1.85e-16	2.2e-15
ALG-1	WBGene00020802	protein_coding_AS	86.992	1.75197	0.213053	8.22314	1.98e-16	2.36e-15
ALG-1	WBGene00010813	protein_coding_AS	103.69	-1.67789	0.204072	-8.22206	2e-16	2.38e-15
ALG-1	WBGene00012827	protein_coding_AS	280.068	0.961457	0.116981	8.21895	2.05e-16	2.44e-15
ALG-1	WBGene00016561	protein_coding_AS	49061.9	-0.206395	0.0251149	-8.21803	2.07e-16	2.45e-15
ALG-1	WBGene00020531	protein_coding_AS	192.744	1.21461	0.1478	8.21791	2.07e-16	2.45e-15
ALG-1	WBGene00003507	protein_coding_AS	4440.03	0.350565	0.0426599	8.21766	2.08e-16	2.46e-15
ALG-1	WBGene00019151	protein_coding_AS	229.454	1.10533	0.134534	8.216	2.1e-16	2.49e-15
ALG-1	WBGene00000023	protein_coding_AS	275.829	0.963859	0.117323	8.21541	2.11e-16	2.5e-15
ALG-1	WBGene00044434	protein_coding_AS	79.4455	1.92128	0.234155	8.20517	2.3e-16	2.72e-15
ALG-1	WBGene00013894	protein_coding_AS	591.492	-0.706443	0.0861055	-8.20439	2.32e-16	2.74e-15
ALG-1	WBGene00003582	protein_coding_AS	674.66	-0.633199	0.0771927	-8.20284	2.35e-16	2.77e-15
ALG-1	WBGene00008312	protein_coding_AS	165.868	1.30022	0.158526	8.20194	2.37e-16	2.79e-15
ALG-1	WBGene00010184	protein_coding_AS	1048.87	0.54519	0.0664899	8.19959	2.41e-16	2.85e-15
ALG-1	WBGene00003026	protein_coding_AS	693.846	0.627627	0.0766136	8.19211	2.57e-16	3.03e-15
ALG-1	WBGene00019569	pseudogene_AS	334.542	-0.890902	0.10878	-8.18996	2.61e-16	3.08e-15
ALG-1	WBGene00219667	lincRNA_AS	280.317	0.991963	0.121221	8.18312	2.77e-16	3.26e-15
ALG-1	WBGene00008950	protein_coding_AS	259.046	1.03228	0.126167	8.18185	2.8e-16	3.29e-15
ALG-1	WBGene00000182	protein_coding_AS	949.936	0.568398	0.0695097	8.17725	2.9e-16	3.42e-15
ALG-1	WBGene00016462	protein_coding_AS	287.935	1.06627	0.130397	8.17708	2.91e-16	3.42e-15
ALG-1	WBGene00004010	protein_coding_AS	111.4	-1.61111	0.19704	-8.17658	2.92e-16	3.43e-15
ALG-1	WBGene00022484	protein_coding_AS	68.094	-2.19975	0.269034	-8.17646	2.92e-16	3.43e-15
ALG-1	WBGene00002223	protein_coding_AS	1343.63	-0.485333	0.0593626	-8.17573	2.94e-16	3.45e-15
ALG-1	WBGene00010778	protein_coding_AS	581.329	0.683204	0.0835686	8.17537	2.95e-16	3.46e-15
ALG-1	WBGene00003555	protein_coding_AS	107.711	-1.64801	0.201585	-8.17528	2.95e-16	3.46e-15
ALG-1	WBGene00009510	protein_coding_AS	218.766	-1.08677	0.132933	-8.17527	2.95e-16	3.46e-15
ALG-1	WBGene00194816	protein_coding_AS	237.214	1.04914	0.128353	8.17384	2.99e-16	3.5e-15
ALG-1	WBGene00008582	protein_coding_AS	767.085	0.602873	0.073776	8.17167	3.04e-16	3.56e-15
ALG-1	WBGene00013711	protein_coding_AS	193.622	1.13963	0.139501	8.16936	3.1e-16	3.63e-15
ALG-1	WBGene00016583	protein_coding_AS	847.116	0.577754	0.0707311	8.16832	3.13e-16	3.66e-15
ALG-1	WBGene00009975	protein_coding_AS	844.406	-0.579646	0.0709723	-8.16721	3.16e-16	3.69e-15
ALG-1	WBGene00019004	protein_coding_AS	816.121	-0.57358	0.0702324	-8.16689	3.16e-16	3.69e-15
ALG-1	WBGene00012294	protein_coding_AS	83.9259	1.81835	0.222656	8.16662	3.17e-16	3.7e-15
ALG-1	WBGene00219295	protein_coding_AS	2160.28	-0.407445	0.049912	-8.16326	3.26e-16	3.8e-15
ALG-1	WBGene00018285	protein_coding_AS	1930.38	0.417082	0.0510932	8.16315	3.26e-16	3.8e-15
ALG-1	WBGene00012745	pseudogene_AS	250.39	-1.04083	0.127527	-8.16164	3.31e-16	3.85e-15
ALG-1	WBGene00015514	protein_coding_AS	96.8536	-1.70021	0.208393	-8.15866	3.39e-16	3.94e-15
ALG-1	WBGene00005015	protein_coding_AS	1620.97	0.42483	0.0520846	8.15654	3.45e-16	4.01e-15
ALG-1	WBGene00015312	protein_coding_AS	675.915	0.639224	0.0783831	8.15513	3.49e-16	4.06e-15
ALG-1	WBGene00022353	protein_coding_AS	631.045	-0.65079	0.079854	-8.14975	3.65e-16	4.24e-15
ALG-1	WBGene00043992	protein_coding_AS	879.382	0.553971	0.0679772	8.14936	3.66e-16	4.25e-15
ALG-1	WBGene00016803	protein_coding_AS	623.165	0.668948	0.0821314	8.14486	3.8e-16	4.41e-15
ALG-1	WBGene00015075	protein_coding_AS	728.714	0.625502	0.0768131	8.14317	3.85e-16	4.47e-15
ALG-1	WBGene00011491	protein_coding_AS	242.441	1.01822	0.125082	8.14035	3.94e-16	4.57e-15
ALG-1	WBGene00011980	protein_coding_AS	1884.68	0.451451	0.05548	8.13718	4.05e-16	4.69e-15
ALG-1	WBGene00015243	pseudogene_AS	1195.82	0.47517	0.0584024	8.13615	4.08e-16	4.73e-15
ALG-1	WBGene00017941	lincRNA_AS	157.214	-1.28968	0.158536	-8.13494	4.12e-16	4.77e-15
ALG-1	WBGene00023481	pseudogene_AS	239.476	-1.04441	0.128434	-8.13191	4.23e-16	4.89e-15
ALG-1	WBGene00013209	protein_coding_AS	541.489	0.690287	0.084912	8.12944	4.31e-16	4.99e-15
ALG-1	WBGene00011291	protein_coding_AS	200.682	-1.15064	0.141573	-8.12753	4.38e-16	5.06e-15
ALG-1	WBGene00017736	protein_coding_AS	243.563	1.05644	0.130067	8.12226	4.58e-16	5.28e-15
ALG-1	WBGene00019409	protein_coding_AS	210.966	1.1126	0.137021	8.1199	4.67e-16	5.39e-15
ALG-1	WBGene00019125	protein_coding_AS	1133.22	-0.545726	0.0672335	-8.11688	4.78e-16	5.52e-15
ALG-1	Helitron2_CE	dfam_repeats_AS	644.263	-0.657171	0.0809765	-8.11557	4.83e-16	5.57e-15
ALG-1	WBGene00235277	protein_coding_AS	583.93	-0.766067	0.0943966	-8.1154	4.84e-16	5.58e-15
ALG-1	cel-miR-800-3p	miRNA	52.8972	-2.54894	0.314261	-8.11093	5.02e-16	5.79e-15
ALG-1	WBGene00021709	protein_coding_AS	66.8945	-2.29446	0.283079	-8.10535	5.26e-16	6.05e-15
ALG-1	WBGene00006307	protein_coding_AS	1955.93	0.398014	0.0491182	8.10319	5.35e-16	6.16e-15
ALG-1	WBGene00015296	protein_coding_AS	718.331	0.613582	0.0757309	8.10214	5.4e-16	6.21e-15
ALG-1	WBGene00009115	protein_coding_AS	281.664	0.974563	0.120292	8.10164	5.42e-16	6.23e-15
ALG-1	WBGene00016416	protein_coding_AS	522.97	0.690464	0.0852435	8.09991	5.5e-16	6.32e-15
ALG-1	WBGene00206359	protein_coding_AS	39.8446	-3.49184	0.431175	-8.09842	5.57e-16	6.39e-15
ALG-1	WBGene00012818	protein_coding_AS	178.134	-1.20233	0.148479	-8.09764	5.6e-16	6.43e-15
ALG-1	WBGene00009149	protein_coding_AS	166.915	1.23951	0.153071	8.0976	5.61e-16	6.43e-15
ALG-1	WBGene00011350	protein_coding_AS	739.384	0.608328	0.0751299	8.09702	5.63e-16	6.45e-15
ALG-1	WBGene00007337	protein_coding_AS	437.785	0.766827	0.0947433	8.09373	5.79e-16	6.63e-15
ALG-1	WBGene00008074	protein_coding_AS	88.7905	1.73145	0.213946	8.09296	5.82e-16	6.66e-15
ALG-1	WBGene00008880	protein_coding_AS	108.408	-1.57046	0.194173	-8.08792	6.07e-16	6.94e-15
ALG-1	WBGene00020717	protein_coding_AS	627.838	0.641219	0.0793177	8.08419	6.26e-16	7.15e-15
ALG-1	WBGene00019243	protein_coding_AS	41.9281	-3.33728	0.413011	-8.08035	6.46e-16	7.38e-15
ALG-1	WBGene00015229	protein_coding_AS	214.368	1.09686	0.13576	8.07945	6.51e-16	7.43e-15
ALG-1	cel-miR-75-3p	miRNA	462.467	-0.839881	0.103996	-8.07612	6.69e-16	7.63e-15
ALG-1	WBGene00012207	protein_coding_AS	113.157	1.47904	0.183206	8.07312	6.85e-16	7.82e-15
ALG-1	WBGene00001976	protein_coding_AS	16081	-0.267392	0.0331379	-8.06907	7.08e-16	8.07e-15
ALG-1	WBGene00194981	protein_coding_AS	2873.26	-0.350953	0.0435009	-8.06772	7.16e-16	8.16e-15
ALG-1	WBGene00017395	protein_coding_AS	1256.92	0.483483	0.0599595	8.0635	7.41e-16	8.44e-15
ALG-1	WBGene00001196	protein_coding_AS	1148.23	-0.514549	0.0638224	-8.0622	7.49e-16	8.53e-15
ALG-1	WBGene00016148	protein_coding_AS	978.186	0.528866	0.0656144	8.06021	7.62e-16	8.66e-15
ALG-1	WBGene00002226	protein_coding_AS	9767.67	0.28348	0.0351714	8.05996	7.63e-16	8.68e-15
ALG-1	WBGene00001090	protein_coding_AS	1754.3	0.411246	0.0510238	8.0599	7.64e-16	8.68e-15
ALG-1	WBGene00011308	protein_coding_AS	560.707	-0.688069	0.0853764	-8.05925	7.68e-16	8.72e-15
ALG-1	WBGene00007100	protein_coding_AS	1046.94	0.556926	0.0691156	8.05789	7.76e-16	8.81e-15
ALG-1	WBGene00002185	protein_coding_AS	559.248	-0.667282	0.0828663	-8.0525	8.11e-16	9.2e-15
ALG-1	WBGene00012040	protein_coding_AS	26005.7	-0.285912	0.0355185	-8.04967	8.3e-16	9.41e-15
ALG-1	cel-miR-231-3p	miRNA	94.9368	-1.71407	0.21315	-8.04163	8.87e-16	1e-14
ALG-1	WBGene00004199	protein_coding_AS	604.957	-0.657528	0.0817789	-8.04032	8.96e-16	1.01e-14
ALG-1	WBGene00010055	protein_coding_AS	805.902	0.56829	0.0707744	8.0296	9.78e-16	1.11e-14
ALG-1	WBGene00016323	protein_coding_AS	572.136	0.695966	0.0866794	8.0292	9.81e-16	1.11e-14
ALG-1	WBGene00010920	protein_coding_AS	409.629	0.79603	0.0991525	8.02834	9.88e-16	1.12e-14
ALG-1	WBGene00020933	protein_coding_AS	405.717	-0.783852	0.0976405	-8.02794	9.91e-16	1.12e-14
ALG-1	WBGene00017911	protein_coding_AS	38.9887	-3.46	0.431009	-8.02767	9.93e-16	1.12e-14
ALG-1	WBGene00018253	protein_coding_AS	233.681	1.01051	0.12588	8.02751	9.95e-16	1.12e-14
ALG-1	WBGene00235158	protein_coding_AS	8011.12	0.266125	0.0331522	8.02738	9.96e-16	1.12e-14
ALG-1	WBGene00012979	protein_coding_AS	152.2	1.30195	0.162253	8.02421	1.02e-15	1.15e-14
ALG-1	LINE2D_CE	dfam_repeats_AS	185.046	-1.23881	0.154426	-8.02201	1.04e-15	1.17e-14
ALG-1	WBGene00001526	protein_coding_AS	2082.45	0.384544	0.0479434	8.02078	1.05e-15	1.18e-14
ALG-1	WBGene00012017	protein_coding_AS	273.573	-1.00025	0.124793	-8.01529	1.1e-15	1.24e-14
ALG-1	WBGene00195093	protein_coding_AS	1233.8	0.479523	0.0598861	8.00725	1.17e-15	1.32e-14
ALG-1	cel-miR-41-3p	miRNA	81.2074	-1.89024	0.236172	-8.00365	1.21e-15	1.36e-14
ALG-1	WBGene00008986	protein_coding_AS	378.337	-0.815275	0.101881	-8.00223	1.22e-15	1.37e-14
ALG-1	WBGene00022486	protein_coding_AS	1845.03	0.407036	0.0508751	8.00069	1.24e-15	1.39e-14
ALG-1	WBGene00021035	protein_coding_AS	294.419	0.899701	0.112477	7.99902	1.25e-15	1.41e-14
ALG-1	WBGene00006130	protein_coding_AS	227.385	-1.17266	0.146631	-7.99738	1.27e-15	1.43e-14
ALG-1	WBGene00002845	protein_coding_AS	1963.62	0.43263	0.0541041	7.99627	1.28e-15	1.44e-14
ALG-1	WBGene00195253	pseudogene_AS	541.507	-0.678106	0.0848278	-7.99391	1.31e-15	1.46e-14
ALG-1	WBGene00008348	protein_coding_AS	196.251	-1.1854	0.148415	-7.98705	1.38e-15	1.55e-14
ALG-1	WBGene00006553	protein_coding_AS	35.671	3.10879	0.389373	7.98408	1.42e-15	1.58e-14
ALG-1	WBGene00022560	protein_coding_AS	81.7031	-1.97913	0.247951	-7.98194	1.44e-15	1.61e-14
ALG-1	WBGene00015469	protein_coding_AS	1797.18	0.416412	0.0521755	7.98099	1.45e-15	1.62e-14
ALG-1	WBGene00005191	protein_coding_AS	217.073	-1.09138	0.13677	-7.97968	1.47e-15	1.64e-14
ALG-1	WBGene00016985	protein_coding_AS	158.57	-1.26286	0.158348	-7.97521	1.52e-15	1.7e-14
ALG-1	WBGene00013100	protein_coding_AS	123.284	-1.49225	0.187203	-7.97129	1.57e-15	1.75e-14
ALG-1	WBGene00009889	protein_coding_AS	190.017	1.18776	0.149105	7.96594	1.64e-15	1.83e-14
ALG-1	WBGene00049168	piRNA	941.131	-0.578432	0.0726204	-7.96515	1.65e-15	1.84e-14
ALG-1	WBGene00017114	protein_coding_AS	181	1.16088	0.14575	7.96486	1.65e-15	1.84e-14
ALG-1	WBGene00011465	protein_coding_AS	130.24	1.35276	0.169887	7.96272	1.68e-15	1.87e-14
ALG-1	WBGene00007880	protein_coding_AS	274.111	0.947665	0.119132	7.95473	1.8e-15	2e-14
ALG-1	WBGene00017179	protein_coding_AS	148.988	1.33727	0.168152	7.95278	1.82e-15	2.03e-14
ALG-1	WBGene00015203	protein_coding_AS	1316.07	-0.511695	0.0643851	-7.94742	1.9e-15	2.12e-14
ALG-1	WBGene00010010	protein_coding_AS	84.0307	-1.85347	0.23325	-7.94628	1.92e-15	2.14e-14
ALG-1	WBGene00010528	protein_coding_AS	125.866	-1.42182	0.179061	-7.94038	2.02e-15	2.24e-14
ALG-1	WBGene00016071	protein_coding_AS	109.298	-1.59697	0.20118	-7.938	2.05e-15	2.28e-14
ALG-1	WBGene00004078	protein_coding_AS	287.93	0.95526	0.120416	7.93298	2.14e-15	2.37e-14
ALG-1	WBGene00010479	protein_coding_AS	1048.85	0.496702	0.0626461	7.9287	2.21e-15	2.46e-14
ALG-1	WBGene00020456	protein_coding_AS	1411.14	-0.459049	0.0579131	-7.92651	2.25e-15	2.5e-14
ALG-1	WBGene00019094	protein_coding_AS	118.578	-1.58499	0.200037	-7.92348	2.31e-15	2.56e-14
ALG-1	WBGene00008003	protein_coding_AS	2569.8	-0.433765	0.0547691	-7.91988	2.38e-15	2.63e-14
ALG-1	WBGene00001736	protein_coding_AS	521.987	-0.750384	0.0947691	-7.91803	2.41e-15	2.67e-14
ALG-1	WBGene00004338	protein_coding_AS	560.771	0.684941	0.0865216	7.91642	2.44e-15	2.7e-14
ALG-1	WBGene00018849	protein_coding_AS	2606.88	0.371256	0.0469325	7.91043	2.57e-15	2.83e-14
ALG-1	WBGene00014987	pseudogene_AS	2441.81	-0.389177	0.049233	-7.9048	2.68e-15	2.96e-14
ALG-1	WBGene00013619	protein_coding_AS	202.679	1.08958	0.137858	7.90366	2.71e-15	2.99e-14
ALG-1	WBGene00018204	protein_coding_AS	274.788	-0.936389	0.118488	-7.90284	2.73e-15	3.01e-14
ALG-1	WBGene00017088	protein_coding_AS	1981.37	0.392498	0.0497125	7.89535	2.89e-15	3.19e-14
ALG-1	WBGene00021635	protein_coding_AS	137.43	-1.37998	0.174846	-7.89253	2.96e-15	3.26e-14
ALG-1	WBGene00013424	protein_coding_AS	98.4973	1.60501	0.203471	7.88814	3.07e-15	3.38e-14
ALG-1	WBGene00020371	pseudogene_AS	120.234	-1.43714	0.182257	-7.88526	3.14e-15	3.46e-14
ALG-1	WBGene00000804	protein_coding_AS	1125.38	0.505555	0.064119	7.88464	3.15e-15	3.47e-14
ALG-1	WBGene00011531	protein_coding_AS	1028.88	-0.496638	0.0629996	-7.8832	3.19e-15	3.51e-14
ALG-1	WBGene00016010	protein_coding_AS	196.822	1.0946	0.138863	7.88261	3.21e-15	3.52e-14
ALG-1	WBGene00008372	protein_coding_AS	110.174	1.48427	0.188325	7.88143	3.24e-15	3.56e-14
ALG-1	WBGene00000393	protein_coding_AS	420.07	-0.795891	0.10101	-7.87935	3.29e-15	3.61e-14
ALG-1	WBGene00004408	protein_coding_AS	381.489	0.836992	0.106242	7.87816	3.32e-15	3.65e-14
ALG-1	WBGene00012972	protein_coding_AS	1769.28	0.422569	0.0536481	7.87669	3.36e-15	3.69e-14
ALG-1	WBGene00007091	protein_coding_AS	1866.63	-0.413064	0.0524441	-7.87627	3.37e-15	3.7e-14
ALG-1	WBGene00022371	protein_coding_AS	377.064	-0.799844	0.101598	-7.87261	3.47e-15	3.8e-14
ALG-1	WBGene00021861	protein_coding_AS	45.3122	-2.75523	0.350018	-7.87169	3.5e-15	3.83e-14
ALG-1	WBGene00014667	pseudogene_AS	3259.78	0.346579	0.0440404	7.86957	3.56e-15	3.89e-14
ALG-1	WBGene00012911	protein_coding_AS	116.368	-1.53649	0.195445	-7.8615	3.8e-15	4.15e-14
ALG-1	WBGene00001488	protein_coding_AS	11284.8	-0.236256	0.0300856	-7.85279	4.07e-15	4.45e-14
ALG-1	WBGene00006661	protein_coding_AS	221.806	1.07439	0.13682	7.85258	4.08e-15	4.45e-14
ALG-1	WBGene00009415	protein_coding_AS	63.7661	-2.15055	0.273901	-7.85154	4.11e-15	4.49e-14
ALG-1	IR3_CE	dfam_repeats_AS	1272.89	-0.452955	0.0577123	-7.84851	4.21e-15	4.59e-14
ALG-1	WBGene00003469	protein_coding_AS	101.776	1.58838	0.202441	7.84613	4.29e-15	4.68e-14
ALG-1	WBGene00011171	protein_coding_AS	225.082	1.03877	0.132417	7.84467	4.34e-15	4.73e-14
ALG-1	WBGene00004901	protein_coding_AS	119.143	1.41301	0.180132	7.84428	4.35e-15	4.74e-14
ALG-1	WBGene00304895	protein_coding_AS	1272.8	-0.477065	0.0608256	-7.84316	4.39e-15	4.78e-14
ALG-1	WBGene00008811	protein_coding_AS	248.304	1.0091	0.12868	7.84193	4.44e-15	4.83e-14
ALG-1	WBGene00016211	pseudogene_AS	407.569	0.768319	0.0980938	7.83249	4.78e-15	5.2e-14
ALG-1	WBGene00044005	protein_coding_AS	203.83	1.07048	0.136676	7.83222	4.79e-15	5.21e-14
ALG-1	WBGene00013592	protein_coding_AS	128.392	1.4209	0.181438	7.83131	4.83e-15	5.25e-14
ALG-1	WBGene00018181	protein_coding_AS	229.633	-1.07111	0.136801	-7.82967	4.89e-15	5.31e-14
ALG-1	WBGene00008133	protein_coding_AS	280.324	-0.951571	0.12155	-7.82866	4.93e-15	5.35e-14
ALG-1	WBGene00008977	protein_coding_AS	59.5613	-2.28938	0.292444	-7.82843	4.94e-15	5.36e-14
ALG-1	WBGene00017711	protein_coding_AS	149.776	-1.38577	0.177033	-7.82775	4.97e-15	5.39e-14
ALG-1	WBGene00021096	protein_coding_AS	575.671	-0.676902	0.0865877	-7.81753	5.39e-15	5.84e-14
ALG-1	WBGene00018016	protein_coding_AS	351.99	-0.901034	0.115314	-7.81377	5.55e-15	6.01e-14
ALG-1	WBGene00195010	protein_coding_AS	187.712	1.14489	0.146537	7.81298	5.59e-15	6.05e-14
ALG-1	WBGene00018135	protein_coding_AS	84.4122	1.76238	0.225672	7.80946	5.74e-15	6.21e-14
ALG-1	WBGene00044461	protein_coding_AS	37.1316	-3.43189	0.439487	-7.80886	5.77e-15	6.24e-14
ALG-1	WBGene00021238	protein_coding_AS	1181.5	-0.484261	0.0620657	-7.8024	6.07e-15	6.57e-14
ALG-1	WBGene00022736	protein_coding_AS	370.755	-0.863614	0.11073	-7.7993	6.23e-15	6.72e-14
ALG-1	WBGene00021910	protein_coding_AS	469.676	-0.73305	0.0940198	-7.79676	6.35e-15	6.86e-14
ALG-1	WBGene00019044	protein_coding_AS	1059.73	-0.567507	0.072792	-7.79628	6.38e-15	6.88e-14
ALG-1	WBGene00020753	protein_coding_AS	511.776	0.701533	0.0899911	7.79558	6.41e-15	6.91e-14
ALG-1	WBGene00219319	protein_coding_AS	680.953	-0.624901	0.0801781	-7.79391	6.5e-15	7e-14
ALG-1	WBGene00016455	protein_coding_AS	62.7975	-2.40976	0.309195	-7.79363	6.51e-15	7.02e-14
ALG-1	WBGene00011687	protein_coding_AS	259.951	0.989778	0.127032	7.79154	6.62e-15	7.13e-14
ALG-1	WBGene00021288	protein_coding_AS	211.878	1.03179	0.132484	7.78804	6.81e-15	7.32e-14
ALG-1	WBGene00009587	protein_coding_AS	1608.03	0.460318	0.0591248	7.78553	6.94e-15	7.47e-14
ALG-1	WBGene00021698	protein_coding_AS	2140.28	0.399142	0.0512837	7.78303	7.08e-15	7.61e-14
ALG-1	WBGene00008138	protein_coding_AS	46.1665	-2.74688	0.353032	-7.78083	7.2e-15	7.74e-14
ALG-1	WBGene00022148	protein_coding_AS	1788.11	0.401055	0.0515542	7.77929	7.29e-15	7.83e-14
ALG-1	WBGene00044077	protein_coding_AS	1690.9	0.405208	0.0521384	7.77177	7.74e-15	8.31e-14
ALG-1	WBGene00018106	protein_coding_AS	85.3397	-1.74812	0.225014	-7.76896	7.91e-15	8.49e-14
ALG-1	WBGene00004971	protein_coding_AS	138.374	1.43124	0.18425	7.76792	7.98e-15	8.56e-14
ALG-1	WBGene00017300	protein_coding_AS	1986.78	0.384307	0.0494885	7.76558	8.13e-15	8.71e-14
ALG-1	WBGene00015481	protein_coding_AS	522.372	0.665507	0.0857148	7.76421	8.22e-15	8.8e-14
ALG-1	WBGene00014062	protein_coding_AS	100.463	1.53115	0.197216	7.76382	8.24e-15	8.82e-14
ALG-1	WBGene00007413	protein_coding_AS	1001.79	0.518625	0.0668077	7.76295	8.3e-15	8.88e-14
ALG-1	WBGene00009127	protein_coding_AS	1519.3	0.476945	0.0614695	7.75906	8.56e-15	9.15e-14
ALG-1	WBGene00004273	protein_coding_AS	1396.39	0.459825	0.059283	7.75644	8.73e-15	9.34e-14
ALG-1	WBGene00013443	protein_coding_AS	1098.62	0.474537	0.0612165	7.75178	9.06e-15	9.68e-14
ALG-1	WBGene00009946	protein_coding_AS	448.459	0.748971	0.0966203	7.75169	9.07e-15	9.68e-14
ALG-1	WBGene00009996	protein_coding_AS	718.779	0.56625	0.0730598	7.75051	9.15e-15	9.77e-14
ALG-1	WBGene00022485	protein_coding_AS	192.037	-1.16438	0.150262	-7.74901	9.26e-15	9.88e-14
ALG-1	WBGene00012018	protein_coding_AS	151.853	-1.30913	0.168962	-7.7481	9.33e-15	9.94e-14
ALG-1	WBGene00007611	protein_coding_AS	64.1232	1.97242	0.254571	7.748	9.33e-15	9.95e-14
ALG-1	WBGene00304981	protein_coding_AS	346.625	0.797118	0.102936	7.74384	9.65e-15	1.03e-13
ALG-1	WBGene00007926	protein_coding_AS	665.194	-0.616102	0.0796132	-7.73869	1e-14	1.07e-13
ALG-1	WBGene00013056	pseudogene_AS	39.4755	2.72606	0.352368	7.73639	1.02e-14	1.09e-13
ALG-1	WBGene00013478	protein_coding_AS	119.84	1.38636	0.179261	7.73374	1.04e-14	1.11e-13
ALG-1	WBGene00015992	protein_coding_AS	78.9778	1.75042	0.226406	7.73133	1.06e-14	1.13e-13
ALG-1	WBGene00003036	protein_coding_AS	753.249	0.658151	0.0851329	7.73087	1.07e-14	1.13e-13
ALG-1	WBGene00015422	protein_coding_AS	170.819	1.16496	0.15069	7.73081	1.07e-14	1.13e-13
ALG-1	WBGene00004959	protein_coding_AS	113.837	1.45097	0.187827	7.72504	1.12e-14	1.19e-13
ALG-1	WBGene00016075	protein_coding_AS	1948.81	0.377663	0.0488908	7.72463	1.12e-14	1.19e-13
ALG-1	WBGene00046335	piRNA	486.343	0.71098	0.0920433	7.72441	1.12e-14	1.19e-13
ALG-1	WBGene00015944	protein_coding_AS	251.789	0.951118	0.123217	7.71908	1.17e-14	1.24e-13
ALG-1	WBGene00011795	protein_coding_AS	101.424	1.50839	0.195461	7.7171	1.19e-14	1.26e-13
ALG-1	WBGene00015629	protein_coding_AS	109.59	1.52103	0.197131	7.71585	1.2e-14	1.27e-13
ALG-1	WBGene00021237	protein_coding_AS	86.4899	-1.6961	0.219881	-7.71374	1.22e-14	1.29e-13
ALG-1	WBGene00020839	protein_coding_AS	713.762	0.647517	0.083962	7.71203	1.24e-14	1.31e-13
ALG-1	WBGene00017291	protein_coding_AS	211.251	-1.06285	0.137974	-7.70328	1.33e-14	1.4e-13
ALG-1	WBGene00008119	protein_coding_AS	683.704	-0.583801	0.075806	-7.70125	1.35e-14	1.42e-13
ALG-1	WBGene00007308	protein_coding_AS	128.318	1.31012	0.170118	7.70124	1.35e-14	1.42e-13
ALG-1	WBGene00008272	protein_coding_AS	83.9424	1.68298	0.218576	7.69977	1.36e-14	1.44e-13
ALG-1	WBGene00012345	protein_coding_AS	300.098	0.892639	0.115962	7.69771	1.39e-14	1.46e-13
ALG-1	WBGene00022279	protein_coding_AS	434.88	-0.741661	0.0963974	-7.69378	1.43e-14	1.51e-13
ALG-1	WBGene00002889	protein_coding_AS	1625.29	0.41869	0.0544603	7.68798	1.49e-14	1.57e-13
ALG-1	WBGene00021014	protein_coding_AS	2383.24	0.35774	0.0465325	7.68797	1.49e-14	1.57e-13
ALG-1	WBGene00020841	protein_coding_AS	87.2514	1.65392	0.215201	7.68546	1.52e-14	1.6e-13
ALG-1	WBGene00271744	protein_coding_AS	369.233	0.795978	0.103653	7.67927	1.6e-14	1.68e-13
ALG-1	WBGene00011054	protein_coding_AS	162.636	-1.22057	0.159058	-7.67374	1.67e-14	1.76e-13
ALG-1	WBGene00006996	protein_coding_AS	1229.85	0.465768	0.0607115	7.67183	1.7e-14	1.78e-13
ALG-1	WBGene00014241	protein_coding_AS	137.927	1.26396	0.16476	7.67147	1.7e-14	1.79e-13
ALG-1	WBGene00169134	piRNA	420.483	0.724166	0.0944063	7.67073	1.71e-14	1.79e-13
ALG-1	WBGene00021010	protein_coding_AS	173.721	1.19437	0.155709	7.67052	1.71e-14	1.8e-13
ALG-1	WBGene00009705	protein_coding_AS	168.798	1.16923	0.152442	7.66998	1.72e-14	1.8e-13
ALG-1	WBGene00007385	protein_coding_AS	299.48	0.847036	0.11046	7.66829	1.74e-14	1.83e-13
ALG-1	WBGene00020496	protein_coding_AS	1161.67	-0.461158	0.0601777	-7.66328	1.81e-14	1.9e-13
ALG-1	WBGene00006975	protein_coding_AS	12400.9	0.22524	0.0293993	7.66141	1.84e-14	1.92e-13
ALG-1	WBGene00013701	protein_coding_AS	141.368	1.26335	0.164919	7.66044	1.85e-14	1.94e-13
ALG-1	WBGene00269391	protein_coding_AS	11796.2	0.228191	0.0297895	7.66011	1.86e-14	1.94e-13
ALG-1	WBGene00016605	protein_coding_AS	325.609	0.86998	0.113664	7.65399	1.95e-14	2.04e-13
ALG-1	WBGene00012595	protein_coding_AS	203.411	1.04718	0.136834	7.65292	1.96e-14	2.05e-13
ALG-1	WBGene00006997	protein_coding_AS	722.175	0.590595	0.0772049	7.64971	2.01e-14	2.1e-13
ALG-1	WBGene00006941	protein_coding_AS	1488.96	0.445185	0.0582081	7.64816	2.04e-14	2.13e-13
ALG-1	WBGene00006740	protein_coding_AS	1182.49	-0.460234	0.0602074	-7.64414	2.1e-14	2.19e-13
ALG-1	WBGene00004906	protein_coding_AS	162.774	1.17605	0.153952	7.63903	2.19e-14	2.28e-13
ALG-1	WBGene00008151	protein_coding_AS	1010.03	0.503847	0.0659961	7.63451	2.27e-14	2.36e-13
ALG-1	WBGene00021466	protein_coding_AS	852.633	0.541549	0.0709906	7.62847	2.38e-14	2.47e-13
ALG-1	WBGene00009005	protein_coding_AS	67.9689	-1.97504	0.258985	-7.62606	2.42e-14	2.52e-13
ALG-1	WBGene00013474	protein_coding_AS	147.1	1.21083	0.158795	7.62509	2.44e-14	2.54e-13
ALG-1	WBGene00021589	protein_coding_AS	896.912	0.516397	0.0678081	7.61557	2.63e-14	2.73e-13
ALG-1	WBGene00015819	protein_coding_AS	1284.85	-0.468993	0.0616167	-7.61145	2.71e-14	2.82e-13
ALG-1	WBGene00013688	protein_coding_AS	1400.08	0.447599	0.0588081	7.61118	2.72e-14	2.82e-13
ALG-1	RC123	dfam_repeats_AS	108.144	-1.6481	0.216687	-7.60592	2.83e-14	2.94e-13
ALG-1	WBGene00019414	protein_coding_AS	35.0507	-3.36271	0.442197	-7.60455	2.86e-14	2.97e-13
ALG-1	WBGene00015133	protein_coding_AS	487.915	0.723876	0.0952955	7.59611	3.05e-14	3.16e-13
ALG-1	WBGene00013343	protein_coding_AS	1666.7	0.448376	0.0590323	7.59543	3.07e-14	3.18e-13
ALG-1	WBGene00013436	protein_coding_AS	828.052	0.526651	0.0693413	7.59505	3.08e-14	3.19e-13
ALG-1	WBGene00006918	protein_coding_AS	216.48	1.04175	0.13721	7.59242	3.14e-14	3.25e-13
ALG-1	WBGene00007617	protein_coding_AS	1418.03	0.461938	0.0608783	7.5879	3.25e-14	3.37e-13
ALG-1	WBGene00019143	protein_coding_AS	54.3553	-2.25988	0.298006	-7.58334	3.37e-14	3.48e-13
ALG-1	WBGene00219688	lincRNA_AS	3619.04	-0.327077	0.0431523	-7.57961	3.47e-14	3.58e-13
ALG-1	cel-miR-790-5p	miRNA	816.119	-1.162	0.153348	-7.57756	3.52e-14	3.64e-13
ALG-1	WBGene00014229	protein_coding_AS	71.1843	1.8822	0.248393	7.57751	3.52e-14	3.64e-13
ALG-1	WBGene00013223	protein_coding_AS	1262.17	0.459657	0.0606771	7.57547	3.58e-14	3.69e-13
ALG-1	WBGene00020295	pseudogene_AS	297.864	-0.873074	0.115284	-7.57326	3.64e-14	3.76e-13
ALG-1	WBGene00001051	protein_coding_AS	1645.6	0.457765	0.0604553	7.57196	3.68e-14	3.79e-13
ALG-1	WBGene00021278	pseudogene_AS	75.6988	-1.81713	0.24005	-7.56977	3.74e-14	3.85e-13
ALG-1	WBGene00003252	protein_coding_AS	123.557	1.31709	0.173998	7.56955	3.75e-14	3.86e-13
ALG-1	WBGene00000257	protein_coding_AS	3689.79	0.311075	0.0411047	7.56786	3.79e-14	3.91e-13
ALG-1	WBGene00008688	protein_coding_AS	654.872	0.582956	0.0770509	7.56586	3.85e-14	3.97e-13
ALG-1	WBGene00017989	protein_coding_AS	1333.71	0.444755	0.0588042	7.56332	3.93e-14	4.04e-13
ALG-1	WBGene00009769	protein_coding_AS	400.759	-0.757059	0.100174	-7.55742	4.11e-14	4.23e-13
ALG-1	WBGene00020985	protein_coding_AS	170.296	1.15199	0.152433	7.5573	4.12e-14	4.23e-13
ALG-1	WBGene00010366	protein_coding_AS	103.051	1.45205	0.192235	7.55352	4.24e-14	4.35e-13
ALG-1	WBGene00021110	protein_coding_AS	167.159	1.14716	0.151887	7.5527	4.26e-14	4.38e-13
ALG-1	WBGene00001763	protein_coding_AS	72.5374	-1.91709	0.253925	-7.54983	4.36e-14	4.47e-13
ALG-1	WBGene00002244	protein_coding_AS	852.596	0.555311	0.0735655	7.54853	4.4e-14	4.51e-13
ALG-1	WBGene00022410	protein_coding_AS	830.172	0.535463	0.0709574	7.54626	4.48e-14	4.59e-13
ALG-1	WBGene00000771	protein_coding_AS	167.48	1.17368	0.155577	7.54405	4.56e-14	4.67e-13
ALG-1	WBGene00012344	protein_coding_AS	500.105	0.704824	0.0934305	7.54383	4.56e-14	4.67e-13
ALG-1	WBGene00011294	pseudogene_AS	80.9278	1.70735	0.226522	7.53725	4.8e-14	4.91e-13
ALG-1	WBGene00003396	protein_coding_AS	161.633	-1.17009	0.155264	-7.53613	4.84e-14	4.95e-13
ALG-1	WBGene00008740	protein_coding_AS	8503.32	-0.264829	0.0351413	-7.53611	4.84e-14	4.95e-13
ALG-1	WBGene00004298	protein_coding_AS	786.356	0.58052	0.0770529	7.53405	4.92e-14	5.03e-13
ALG-1	WBGene00004510	protein_coding_AS	1604.12	0.447794	0.0594415	7.53335	4.95e-14	5.05e-13
ALG-1	WBGene00008255	protein_coding_AS	287.411	0.860136	0.114201	7.5318	5e-14	5.11e-13
ALG-1	WBGene00044026	protein_coding_AS	246.031	0.954328	0.126728	7.53051	5.05e-14	5.16e-13
ALG-1	WBGene00009026	protein_coding_AS	92.8359	-1.66838	0.221611	-7.52841	5.14e-14	5.24e-13
ALG-1	WBGene00015350	protein_coding_AS	176.875	-1.1099	0.147434	-7.52812	5.15e-14	5.25e-13
ALG-1	WBGene00012610	protein_coding_AS	115.7	-1.48186	0.1969	-7.52596	5.23e-14	5.33e-13
ALG-1	WBGene00014915	pseudogene_AS	2169.35	-0.351754	0.0467419	-7.52545	5.25e-14	5.35e-13
ALG-1	WBGene00022849	protein_coding_AS	171.767	1.18363	0.157298	7.52473	5.28e-14	5.38e-13
ALG-1	cel-miR-42-3p	miRNA	232.389	-1.05614	0.140488	-7.51765	5.58e-14	5.67e-13
ALG-1	HATN1_CE	dfam_repeats_AS	1004.69	-0.504678	0.0671342	-7.51746	5.59e-14	5.68e-13
ALG-1	WBGene00044763	protein_coding_AS	178.956	1.11402	0.148266	7.51368	5.75e-14	5.84e-13
ALG-1	WBGene00020484	protein_coding_AS	65.8648	-1.9375	0.257989	-7.51	5.91e-14	6.01e-13
ALG-1	WBGene00009507	protein_coding_AS	2788.84	0.331937	0.0442145	7.50743	6.03e-14	6.12e-13
ALG-1	WBGene00019327	protein_coding_AS	24681.4	-0.268004	0.0356987	-7.50738	6.03e-14	6.12e-13
ALG-1	WBGene00206532	protein_coding_AS	249.599	-0.940533	0.125288	-7.50698	6.05e-14	6.14e-13
ALG-1	WBGene00015305	protein_coding_AS	168.046	1.1346	0.151193	7.50436	6.17e-14	6.26e-13
ALG-1	WBGene00008517	protein_coding_AS	63795.9	-0.249998	0.0333197	-7.50302	6.24e-14	6.32e-13
ALG-1	WBGene00045457	protein_coding_AS	34.0235	-3.49344	0.465895	-7.49834	6.46e-14	6.55e-13
ALG-1	WBGene00013983	protein_coding_AS	561.242	0.646455	0.0862232	7.49746	6.51e-14	6.59e-13
[truncated: 766,392+ more rows]
