# Supplementary material for: A comprehensive survey of C. elegans argonaute proteins reveals organism-wide gene regulatory networks and functions
Source: eLife. 2023 Feb 15;12:e83853. doi: 10.7554/eLife.83853 (PMC10101689; doi:10.7554/eLife.83853)
Supplement: Supplementary file 7. [file elife-83853-supp7.xlsx]

## Sheet: ALG-3 26G GO terms
source	term_name	term_id	adjusted_p_value	negative_log10_of_adjusted_p_value	term_size	query_size	intersection_size	effective_domain_size	intersections
GO:MF	catalytic activity, acting on a protein	GO:0140096	1.1e-49	48.9596	1396	1536	388	11339	WBGENE00000099,WBGENE00000102,WBGENE00000155,WBGENE00000226,WBGENE00000254,WBGENE00000259,WBGENE00000275,WBGENE00000389,WBGENE00000405,WBGENE00000407,WBGENE00000410,WBGENE00000500,WBGENE00000543,WBGENE00000548,WBGENE00000885,WBGENE00001056,WBGENE00001112,WBGENE00001229,WBGENE00001334,WBGENE00001405,WBGENE00001426,WBGENE00001427,WBGENE00001431,WBGENE00001487,WBGENE00001526,WBGENE00001538,WBGENE000…
GO:MF	catalytic activity	GO:0003824	1.77e-46	45.7515	4009	1536	804	11339	WBGENE00000041,WBGENE00000099,WBGENE00000101,WBGENE00000102,WBGENE00000114,WBGENE00000117,WBGENE00000155,WBGENE00000182,WBGENE00000183,WBGENE00000184,WBGENE00000187,WBGENE00000198,WBGENE00000226,WBGENE00000229,WBGENE00000230,WBGENE00000248,WBGENE00000254,WBGENE00000259,WBGENE00000266,WBGENE00000268,WBGENE00000269,WBGENE00000275,WBGENE00000369,WBGENE00000376,WBGENE00000379,WBGENE00000389,WBGENE000…
GO:MF	nucleotide binding	GO:0000166	1.02e-39	38.9923	1310	1536	350	11339	WBGENE00000019,WBGENE00000020,WBGENE00000023,WBGENE00000099,WBGENE00000102,WBGENE00000182,WBGENE00000183,WBGENE00000184,WBGENE00000187,WBGENE00000226,WBGENE00000229,WBGENE00000248,WBGENE00000257,WBGENE00000275,WBGENE00000379,WBGENE00000390,WBGENE00000405,WBGENE00000407,WBGENE00000410,WBGENE00000418,WBGENE00000800,WBGENE00000915,WBGENE00000939,WBGENE00000962,WBGENE00001007,WBGENE00001030,WBGENE000…
GO:MF	nucleoside phosphate binding	GO:1901265	1.02e-39	38.9923	1310	1536	350	11339	WBGENE00000019,WBGENE00000020,WBGENE00000023,WBGENE00000099,WBGENE00000102,WBGENE00000182,WBGENE00000183,WBGENE00000184,WBGENE00000187,WBGENE00000226,WBGENE00000229,WBGENE00000248,WBGENE00000257,WBGENE00000275,WBGENE00000379,WBGENE00000390,WBGENE00000405,WBGENE00000407,WBGENE00000410,WBGENE00000418,WBGENE00000800,WBGENE00000915,WBGENE00000939,WBGENE00000962,WBGENE00001007,WBGENE00001030,WBGENE000…
GO:MF	anion binding	GO:0043168	3.22e-39	38.4915	1300	1536	347	11339	WBGENE00000019,WBGENE00000020,WBGENE00000023,WBGENE00000099,WBGENE00000102,WBGENE00000182,WBGENE00000183,WBGENE00000184,WBGENE00000187,WBGENE00000226,WBGENE00000229,WBGENE00000248,WBGENE00000257,WBGENE00000275,WBGENE00000379,WBGENE00000390,WBGENE00000405,WBGENE00000407,WBGENE00000410,WBGENE00000418,WBGENE00000800,WBGENE00000915,WBGENE00000939,WBGENE00000962,WBGENE00001007,WBGENE00001030,WBGENE000…
GO:MF	small molecule binding	GO:0036094	7.34e-38	37.1345	1427	1536	367	11339	WBGENE00000019,WBGENE00000020,WBGENE00000023,WBGENE00000099,WBGENE00000102,WBGENE00000182,WBGENE00000183,WBGENE00000184,WBGENE00000187,WBGENE00000226,WBGENE00000229,WBGENE00000248,WBGENE00000257,WBGENE00000275,WBGENE00000379,WBGENE00000390,WBGENE00000405,WBGENE00000407,WBGENE00000410,WBGENE00000418,WBGENE00000800,WBGENE00000915,WBGENE00000939,WBGENE00000962,WBGENE00001007,WBGENE00001030,WBGENE000…
GO:MF	purine ribonucleotide binding	GO:0032555	1.38e-37	36.8614	1138	1536	313	11339	WBGENE00000019,WBGENE00000020,WBGENE00000023,WBGENE00000099,WBGENE00000102,WBGENE00000182,WBGENE00000183,WBGENE00000184,WBGENE00000187,WBGENE00000226,WBGENE00000229,WBGENE00000248,WBGENE00000257,WBGENE00000275,WBGENE00000379,WBGENE00000390,WBGENE00000405,WBGENE00000407,WBGENE00000410,WBGENE00000418,WBGENE00000800,WBGENE00000915,WBGENE00000939,WBGENE00000962,WBGENE00001007,WBGENE00001030,WBGENE000…
GO:MF	ribonucleotide binding	GO:0032553	5.73e-37	36.2419	1156	1536	315	11339	WBGENE00000019,WBGENE00000020,WBGENE00000023,WBGENE00000099,WBGENE00000102,WBGENE00000182,WBGENE00000183,WBGENE00000184,WBGENE00000187,WBGENE00000226,WBGENE00000229,WBGENE00000248,WBGENE00000257,WBGENE00000275,WBGENE00000379,WBGENE00000390,WBGENE00000405,WBGENE00000407,WBGENE00000410,WBGENE00000418,WBGENE00000800,WBGENE00000915,WBGENE00000939,WBGENE00000962,WBGENE00001007,WBGENE00001030,WBGENE000…
GO:MF	purine ribonucleoside triphosphate binding	GO:0035639	1.16e-36	35.936	1112	1536	306	11339	WBGENE00000019,WBGENE00000020,WBGENE00000023,WBGENE00000099,WBGENE00000102,WBGENE00000182,WBGENE00000183,WBGENE00000184,WBGENE00000187,WBGENE00000226,WBGENE00000229,WBGENE00000248,WBGENE00000257,WBGENE00000275,WBGENE00000379,WBGENE00000390,WBGENE00000405,WBGENE00000407,WBGENE00000410,WBGENE00000800,WBGENE00000915,WBGENE00000939,WBGENE00000962,WBGENE00001007,WBGENE00001030,WBGENE00001037,WBGENE000…
GO:MF	purine nucleotide binding	GO:0017076	1.91e-36	35.72	1157	1536	314	11339	WBGENE00000019,WBGENE00000020,WBGENE00000023,WBGENE00000099,WBGENE00000102,WBGENE00000182,WBGENE00000183,WBGENE00000184,WBGENE00000187,WBGENE00000226,WBGENE00000229,WBGENE00000248,WBGENE00000257,WBGENE00000275,WBGENE00000379,WBGENE00000390,WBGENE00000405,WBGENE00000407,WBGENE00000410,WBGENE00000418,WBGENE00000800,WBGENE00000915,WBGENE00000939,WBGENE00000962,WBGENE00001007,WBGENE00001030,WBGENE000…
GO:MF	adenyl nucleotide binding	GO:0030554	4.67e-33	32.3309	971	1536	271	11339	WBGENE00000019,WBGENE00000020,WBGENE00000023,WBGENE00000099,WBGENE00000102,WBGENE00000226,WBGENE00000229,WBGENE00000257,WBGENE00000275,WBGENE00000379,WBGENE00000405,WBGENE00000407,WBGENE00000410,WBGENE00000418,WBGENE00000800,WBGENE00000915,WBGENE00000939,WBGENE00000962,WBGENE00001007,WBGENE00001030,WBGENE00001037,WBGENE00001094,WBGENE00001153,WBGENE00001487,WBGENE00001526,WBGENE00001538,WBGENE000…
GO:MF	adenyl ribonucleotide binding	GO:0032559	5.92e-33	32.2278	967	1536	270	11339	WBGENE00000019,WBGENE00000020,WBGENE00000023,WBGENE00000099,WBGENE00000102,WBGENE00000226,WBGENE00000229,WBGENE00000257,WBGENE00000275,WBGENE00000379,WBGENE00000405,WBGENE00000407,WBGENE00000410,WBGENE00000418,WBGENE00000800,WBGENE00000915,WBGENE00000939,WBGENE00000962,WBGENE00001007,WBGENE00001030,WBGENE00001037,WBGENE00001094,WBGENE00001153,WBGENE00001487,WBGENE00001526,WBGENE00001538,WBGENE000…
GO:MF	phosphoprotein phosphatase activity	GO:0004721	1.92e-32	31.7169	173	1536	91	11339	WBGENE00000389,WBGENE00000548,WBGENE00004084,WBGENE00004086,WBGENE00007354,WBGENE00007415,WBGENE00007610,WBGENE00007697,WBGENE00007699,WBGENE00007700,WBGENE00007763,WBGENE00008124,WBGENE00008661,WBGENE00009054,WBGENE00009079,WBGENE00009101,WBGENE00009129,WBGENE00009401,WBGENE00009492,WBGENE00009548,WBGENE00009605,WBGENE00009701,WBGENE00009893,WBGENE00010072,WBGENE00010136,WBGENE00010265,WBGENE000…
GO:MF	carbohydrate derivative binding	GO:0097367	8.5e-32	31.0706	1233	1536	317	11339	WBGENE00000019,WBGENE00000020,WBGENE00000023,WBGENE00000099,WBGENE00000102,WBGENE00000182,WBGENE00000183,WBGENE00000184,WBGENE00000187,WBGENE00000226,WBGENE00000229,WBGENE00000248,WBGENE00000257,WBGENE00000275,WBGENE00000379,WBGENE00000390,WBGENE00000405,WBGENE00000407,WBGENE00000410,WBGENE00000418,WBGENE00000800,WBGENE00000915,WBGENE00000939,WBGENE00000962,WBGENE00001007,WBGENE00001030,WBGENE000…
GO:MF	ATP binding	GO:0005524	1.23e-31	30.9102	946	1536	263	11339	WBGENE00000019,WBGENE00000020,WBGENE00000023,WBGENE00000099,WBGENE00000102,WBGENE00000226,WBGENE00000229,WBGENE00000257,WBGENE00000275,WBGENE00000379,WBGENE00000405,WBGENE00000407,WBGENE00000410,WBGENE00000800,WBGENE00000915,WBGENE00000939,WBGENE00000962,WBGENE00001007,WBGENE00001030,WBGENE00001037,WBGENE00001094,WBGENE00001487,WBGENE00001526,WBGENE00001538,WBGENE00001598,WBGENE00001746,WBGENE000…
GO:MF	kinase activity	GO:0016301	8.14e-25	24.0891	567	1536	173	11339	WBGENE00000099,WBGENE00000101,WBGENE00000102,WBGENE00000226,WBGENE00000275,WBGENE00000405,WBGENE00000407,WBGENE00000410,WBGENE00000517,WBGENE00001487,WBGENE00001526,WBGENE00001538,WBGENE00001746,WBGENE00002147,WBGENE00002191,WBGENE00002193,WBGENE00002198,WBGENE00002201,WBGENE00002202,WBGENE00002204,WBGENE00002206,WBGENE00002208,WBGENE00002583,WBGENE00002694,WBGENE00002879,WBGENE00003150,WBGENE000…
GO:MF	phosphatase activity	GO:0016791	8.76e-25	24.0576	246	1536	101	11339	WBGENE00000389,WBGENE00000548,WBGENE00004084,WBGENE00004086,WBGENE00006460,WBGENE00007354,WBGENE00007415,WBGENE00007548,WBGENE00007610,WBGENE00007697,WBGENE00007699,WBGENE00007700,WBGENE00007763,WBGENE00007912,WBGENE00008124,WBGENE00008661,WBGENE00009054,WBGENE00009079,WBGENE00009101,WBGENE00009129,WBGENE00009264,WBGENE00009401,WBGENE00009492,WBGENE00009548,WBGENE00009605,WBGENE00009701,WBGENE000…
GO:MF	phosphoric ester hydrolase activity	GO:0042578	4.61e-24	23.336	283	1536	109	11339	WBGENE00000389,WBGENE00000548,WBGENE00004040,WBGENE00004084,WBGENE00004086,WBGENE00006460,WBGENE00007354,WBGENE00007415,WBGENE00007548,WBGENE00007610,WBGENE00007697,WBGENE00007699,WBGENE00007700,WBGENE00007763,WBGENE00007912,WBGENE00008124,WBGENE00008661,WBGENE00009054,WBGENE00009079,WBGENE00009101,WBGENE00009129,WBGENE00009264,WBGENE00009401,WBGENE00009492,WBGENE00009548,WBGENE00009605,WBGENE000…
GO:MF	protein kinase activity	GO:0004672	1.55e-23	22.8094	446	1536	145	11339	WBGENE00000099,WBGENE00000102,WBGENE00000226,WBGENE00000275,WBGENE00000405,WBGENE00000407,WBGENE00000410,WBGENE00001487,WBGENE00001526,WBGENE00001538,WBGENE00001746,WBGENE00002147,WBGENE00002191,WBGENE00002193,WBGENE00002198,WBGENE00002201,WBGENE00002202,WBGENE00002204,WBGENE00002206,WBGENE00002208,WBGENE00002583,WBGENE00002694,WBGENE00003150,WBGENE00003403,WBGENE00003916,WBGENE00004042,WBGENE000…
GO:MF	transferase activity, transferring phosphorus-containing groups	GO:0016772	1.14e-22	21.9417	675	1536	190	11339	WBGENE00000099,WBGENE00000101,WBGENE00000102,WBGENE00000226,WBGENE00000275,WBGENE00000405,WBGENE00000407,WBGENE00000410,WBGENE00000517,WBGENE00001487,WBGENE00001526,WBGENE00001538,WBGENE00001596,WBGENE00001746,WBGENE00002147,WBGENE00002191,WBGENE00002193,WBGENE00002198,WBGENE00002201,WBGENE00002202,WBGENE00002204,WBGENE00002206,WBGENE00002208,WBGENE00002583,WBGENE00002694,WBGENE00002879,WBGENE000…
GO:MF	phosphotransferase activity, alcohol group as acceptor	GO:0016773	5.74e-21	20.2412	504	1536	152	11339	WBGENE00000099,WBGENE00000102,WBGENE00000226,WBGENE00000275,WBGENE00000405,WBGENE00000407,WBGENE00000410,WBGENE00001487,WBGENE00001526,WBGENE00001538,WBGENE00001746,WBGENE00002147,WBGENE00002191,WBGENE00002193,WBGENE00002198,WBGENE00002201,WBGENE00002202,WBGENE00002204,WBGENE00002206,WBGENE00002208,WBGENE00002583,WBGENE00002694,WBGENE00003150,WBGENE00003403,WBGENE00003916,WBGENE00004042,WBGENE000…
GO:MF	protein tyrosine phosphatase activity	GO:0004725	2.32e-20	19.6337	113	1536	59	11339	WBGENE00000389,WBGENE00000548,WBGENE00004084,WBGENE00007415,WBGENE00007610,WBGENE00007697,WBGENE00008661,WBGENE00009129,WBGENE00009401,WBGENE00009492,WBGENE00009548,WBGENE00009605,WBGENE00009701,WBGENE00010072,WBGENE00010136,WBGENE00010634,WBGENE00010636,WBGENE00010869,WBGENE00010876,WBGENE00011918,WBGENE00011967,WBGENE00012138,WBGENE00012173,WBGENE00012689,WBGENE00013304,WBGENE00013388,WBGENE000…
GO:MF	non-membrane spanning protein tyrosine kinase activity	GO:0004715	1.86e-19	18.7301	39	1536	32	11339	WBGENE00002193,WBGENE00002198,WBGENE00002204,WBGENE00002206,WBGENE00002208,WBGENE00004962,WBGENE00009039,WBGENE00009160,WBGENE00010712,WBGENE00011039,WBGENE00012010,WBGENE00012011,WBGENE00012172,WBGENE00012785,WBGENE00013475,WBGENE00013801,WBGENE00013811,WBGENE00014813,WBGENE00015994,WBGENE00016085,WBGENE00016416,WBGENE00016462,WBGENE00016954,WBGENE00017736,WBGENE00018999,WBGENE00019081,WBGENE000…
GO:MF	ion binding	GO:0043167	3.38e-19	18.4712	2751	1536	526	11339	WBGENE00000019,WBGENE00000020,WBGENE00000023,WBGENE00000097,WBGENE00000099,WBGENE00000101,WBGENE00000102,WBGENE00000155,WBGENE00000182,WBGENE00000183,WBGENE00000184,WBGENE00000187,WBGENE00000226,WBGENE00000229,WBGENE00000248,WBGENE00000257,WBGENE00000275,WBGENE00000376,WBGENE00000379,WBGENE00000390,WBGENE00000405,WBGENE00000407,WBGENE00000410,WBGENE00000418,WBGENE00000552,WBGENE00000567,WBGENE000…
GO:MF	hydrolase activity	GO:0016787	4.43e-17	16.3532	1491	1536	319	11339	WBGENE00000155,WBGENE00000182,WBGENE00000183,WBGENE00000184,WBGENE00000187,WBGENE00000248,WBGENE00000254,WBGENE00000369,WBGENE00000376,WBGENE00000379,WBGENE00000389,WBGENE00000390,WBGENE00000543,WBGENE00000548,WBGENE00000915,WBGENE00000939,WBGENE00001016,WBGENE00001056,WBGENE00001112,WBGENE00001167,WBGENE00001168,WBGENE00001229,WBGENE00001405,WBGENE00001509,WBGENE00001678,WBGENE00001747,WBGENE000…
GO:MF	protein serine/threonine kinase activity	GO:0004674	4.47e-17	16.3499	256	1536	91	11339	WBGENE00000102,WBGENE00000226,WBGENE00002147,WBGENE00002201,WBGENE00002583,WBGENE00002694,WBGENE00003150,WBGENE00003403,WBGENE00004879,WBGENE00004960,WBGENE00004980,WBGENE00006579,WBGENE00007028,WBGENE00007049,WBGENE00007269,WBGENE00007305,WBGENE00007335,WBGENE00007448,WBGENE00007563,WBGENE00007777,WBGENE00007791,WBGENE00007977,WBGENE00008235,WBGENE00008423,WBGENE00008424,WBGENE00008662,WBGENE000…
GO:MF	hydrolase activity, acting on ester bonds	GO:0016788	7.26e-16	15.1393	542	1536	148	11339	WBGENE00000369,WBGENE00000376,WBGENE00000389,WBGENE00000548,WBGENE00000939,WBGENE00001016,WBGENE00002147,WBGENE00003403,WBGENE00003504,WBGENE00003906,WBGENE00004040,WBGENE00004084,WBGENE00004086,WBGENE00004323,WBGENE00006460,WBGENE00006626,WBGENE00007354,WBGENE00007415,WBGENE00007548,WBGENE00007610,WBGENE00007697,WBGENE00007699,WBGENE00007700,WBGENE00007763,WBGENE00007912,WBGENE00008124,WBGENE000…
GO:MF	protein serine/threonine phosphatase activity	GO:0004722	2.54e-13	12.5958	52	1536	32	11339	WBGENE00004086,WBGENE00007354,WBGENE00007699,WBGENE00007700,WBGENE00007763,WBGENE00008124,WBGENE00009054,WBGENE00009079,WBGENE00009101,WBGENE00009893,WBGENE00010265,WBGENE00010992,WBGENE00011133,WBGENE00011808,WBGENE00011953,WBGENE00012008,WBGENE00012741,WBGENE00013476,WBGENE00015661,WBGENE00016010,WBGENE00016081,WBGENE00016398,WBGENE00017636,WBGENE00017817,WBGENE00018232,WBGENE00018359,WBGENE000…
GO:MF	transferase activity	GO:0016740	5.58e-11	10.253	1643	1536	320	11339	WBGENE00000099,WBGENE00000101,WBGENE00000102,WBGENE00000226,WBGENE00000268,WBGENE00000269,WBGENE00000275,WBGENE00000405,WBGENE00000407,WBGENE00000410,WBGENE00000500,WBGENE00000517,WBGENE00000833,WBGENE00001239,WBGENE00001241,WBGENE00001242,WBGENE00001245,WBGENE00001246,WBGENE00001487,WBGENE00001505,WBGENE00001526,WBGENE00001538,WBGENE00001574,WBGENE00001596,WBGENE00001632,WBGENE00001639,WBGENE000…
GO:MF	transmembrane receptor protein tyrosine kinase activity	GO:0004714	1.46e-10	9.83447	68	1536	34	11339	WBGENE00002193,WBGENE00002198,WBGENE00002204,WBGENE00002206,WBGENE00002208,WBGENE00003150,WBGENE00004962,WBGENE00009039,WBGENE00009160,WBGENE00010712,WBGENE00011039,WBGENE00012010,WBGENE00012011,WBGENE00012172,WBGENE00012785,WBGENE00013475,WBGENE00013801,WBGENE00013811,WBGENE00014813,WBGENE00015994,WBGENE00016085,WBGENE00016416,WBGENE00016462,WBGENE00016954,WBGENE00017736,WBGENE00018999,WBGENE000…
GO:MF	transmembrane receptor protein kinase activity	GO:0019199	7.76e-09	8.11005	76	1536	34	11339	WBGENE00002193,WBGENE00002198,WBGENE00002204,WBGENE00002206,WBGENE00002208,WBGENE00003150,WBGENE00004962,WBGENE00009039,WBGENE00009160,WBGENE00010712,WBGENE00011039,WBGENE00012010,WBGENE00012011,WBGENE00012172,WBGENE00012785,WBGENE00013475,WBGENE00013801,WBGENE00013811,WBGENE00014813,WBGENE00015994,WBGENE00016085,WBGENE00016416,WBGENE00016462,WBGENE00016954,WBGENE00017736,WBGENE00018999,WBGENE000…
GO:MF	protein tyrosine kinase activity	GO:0004713	2.02e-08	7.6946	82	1536	35	11339	WBGENE00001487,WBGENE00002193,WBGENE00002198,WBGENE00002204,WBGENE00002206,WBGENE00002208,WBGENE00003150,WBGENE00004962,WBGENE00009039,WBGENE00009160,WBGENE00010712,WBGENE00011039,WBGENE00012010,WBGENE00012011,WBGENE00012172,WBGENE00012785,WBGENE00013475,WBGENE00013801,WBGENE00013811,WBGENE00014813,WBGENE00015994,WBGENE00016085,WBGENE00016416,WBGENE00016462,WBGENE00016954,WBGENE00017736,WBGENE000…
GO:MF	structural constituent of ribosome	GO:0003735	8.25e-08	7.08338	163	1536	53	11339	WBGENE00004408,WBGENE00004409,WBGENE00004410,WBGENE00004415,WBGENE00004416,WBGENE00004418,WBGENE00004420,WBGENE00004422,WBGENE00004424,WBGENE00004426,WBGENE00004428,WBGENE00004430,WBGENE00004431,WBGENE00004433,WBGENE00004439,WBGENE00004441,WBGENE00004442,WBGENE00004445,WBGENE00004447,WBGENE00004448,WBGENE00004449,WBGENE00004452,WBGENE00004453,WBGENE00004456,WBGENE00004470,WBGENE00004471,WBGENE000…
GO:MF	proton transmembrane transporter activity	GO:0015078	1.94e-06	5.71299	70	1536	29	11339	WBGENE00000206,WBGENE00000209,WBGENE00000229,WBGENE00000230,WBGENE00002162,WBGENE00003735,WBGENE00006519,WBGENE00006768,WBGENE00006911,WBGENE00006917,WBGENE00006918,WBGENE00006919,WBGENE00006920,WBGENE00007385,WBGENE00009882,WBGENE00010130,WBGENE00010419,WBGENE00011015,WBGENE00011273,WBGENE00012033,WBGENE00012354,WBGENE00013025,WBGENE00016258,WBGENE00017982,WBGENE00018698,WBGENE00019061,WBGENE000…
GO:MF	electron transfer activity	GO:0009055	8.5e-06	5.0705	30	1536	17	11339	WBGENE00000869,WBGENE00002162,WBGENE00002855,WBGENE00003225,WBGENE00003831,WBGENE00006433,WBGENE00006519,WBGENE00009187,WBGENE00009992,WBGENE00012354,WBGENE00012376,WBGENE00013854,WBGENE00016392,WBGENE00016393,WBGENE00017734,WBGENE00020417,WBGENE00021562
GO:MF	translation regulator activity	GO:0045182	8.79e-06	5.05589	70	1536	28	11339	WBGENE00000770,WBGENE00000771,WBGENE00001168,WBGENE00001225,WBGENE00001227,WBGENE00001229,WBGENE00001230,WBGENE00001233,WBGENE00002059,WBGENE00002061,WBGENE00002064,WBGENE00002066,WBGENE00008480,WBGENE00008670,WBGENE00010405,WBGENE00010560,WBGENE00012768,WBGENE00015920,WBGENE00016113,WBGENE00016496,WBGENE00018846,WBGENE00019162,WBGENE00019537,WBGENE00019543,WBGENE00020269,WBGENE00021351,WBGENE000…
GO:MF	translation initiation factor activity	GO:0003743	8.99e-06	5.04616	40	1536	20	11339	WBGENE00001225,WBGENE00001227,WBGENE00001229,WBGENE00001230,WBGENE00001233,WBGENE00002059,WBGENE00002061,WBGENE00002064,WBGENE00002066,WBGENE00008480,WBGENE00008670,WBGENE00010560,WBGENE00015920,WBGENE00016113,WBGENE00016496,WBGENE00019162,WBGENE00019543,WBGENE00021351,WBGENE00021466,WBGENE00303000
GO:MF	translation factor activity, RNA binding	GO:0008135	2.69e-05	4.5696	61	1536	25	11339	WBGENE00001168,WBGENE00001225,WBGENE00001227,WBGENE00001229,WBGENE00001230,WBGENE00001233,WBGENE00002059,WBGENE00002061,WBGENE00002064,WBGENE00002066,WBGENE00008480,WBGENE00008670,WBGENE00010405,WBGENE00010560,WBGENE00012768,WBGENE00015920,WBGENE00016113,WBGENE00016496,WBGENE00018846,WBGENE00019162,WBGENE00019543,WBGENE00020269,WBGENE00021351,WBGENE00021466,WBGENE00303000
GO:MF	translation regulator activity, nucleic acid binding	GO:0090079	3.94e-05	4.40469	62	1536	25	11339	WBGENE00001168,WBGENE00001225,WBGENE00001227,WBGENE00001229,WBGENE00001230,WBGENE00001233,WBGENE00002059,WBGENE00002061,WBGENE00002064,WBGENE00002066,WBGENE00008480,WBGENE00008670,WBGENE00010405,WBGENE00010560,WBGENE00012768,WBGENE00015920,WBGENE00016113,WBGENE00016496,WBGENE00018846,WBGENE00019162,WBGENE00019543,WBGENE00020269,WBGENE00021351,WBGENE00021466,WBGENE00303000
GO:MF	ubiquitin-protein transferase activity	GO:0004842	4.06e-05	4.39184	114	1536	37	11339	WBGENE00000500,WBGENE00002344,WBGENE00003917,WBGENE00004320,WBGENE00004759,WBGENE00004768,WBGENE00006702,WBGENE00006703,WBGENE00006704,WBGENE00006707,WBGENE00006713,WBGENE00006715,WBGENE00006719,WBGENE00006720,WBGENE00006734,WBGENE00007009,WBGENE00007574,WBGENE00007626,WBGENE00007643,WBGENE00008330,WBGENE00008429,WBGENE00008433,WBGENE00008871,WBGENE00012933,WBGENE00013270,WBGENE00013538,WBGENE000…
GO:MF	ATP-dependent activity	GO:0140657	4.19e-05	4.37793	352	1536	83	11339	WBGENE00000019,WBGENE00000020,WBGENE00000023,WBGENE00000257,WBGENE00000379,WBGENE00000915,WBGENE00000962,WBGENE00001016,WBGENE00001303,WBGENE00001598,WBGENE00001812,WBGENE00001840,WBGENE00002005,WBGENE00002007,WBGENE00002008,WBGENE00002010,WBGENE00002036,WBGENE00002083,WBGENE00002219,WBGENE00002244,WBGENE00003153,WBGENE00003367,WBGENE00003389,WBGENE00003777,WBGENE00003818,WBGENE00004063,WBGENE000…
GO:MF	nucleoside-triphosphatase activity	GO:0017111	4.45e-05	4.3516	292	1536	72	11339	WBGENE00000182,WBGENE00000183,WBGENE00000184,WBGENE00000187,WBGENE00000248,WBGENE00000379,WBGENE00000390,WBGENE00000915,WBGENE00001167,WBGENE00001168,WBGENE00001509,WBGENE00001678,WBGENE00002005,WBGENE00002007,WBGENE00002008,WBGENE00002010,WBGENE00002219,WBGENE00003367,WBGENE00003818,WBGENE00004266,WBGENE00004269,WBGENE00004271,WBGENE00004272,WBGENE00004273,WBGENE00004274,WBGENE00004283,WBGENE000…
GO:MF	hydrolase activity, acting on acid anhydrides	GO:0016817	5.62e-05	4.24998	321	1536	77	11339	WBGENE00000182,WBGENE00000183,WBGENE00000184,WBGENE00000187,WBGENE00000248,WBGENE00000379,WBGENE00000390,WBGENE00000915,WBGENE00001167,WBGENE00001168,WBGENE00001509,WBGENE00001678,WBGENE00002005,WBGENE00002007,WBGENE00002008,WBGENE00002010,WBGENE00002219,WBGENE00003367,WBGENE00003580,WBGENE00003818,WBGENE00004266,WBGENE00004269,WBGENE00004271,WBGENE00004272,WBGENE00004273,WBGENE00004274,WBGENE000…
GO:MF	hydrolase activity, acting on acid anhydrides, in phosphorus-containing anhydrides	GO:0016818	5.62e-05	4.24998	321	1536	77	11339	WBGENE00000182,WBGENE00000183,WBGENE00000184,WBGENE00000187,WBGENE00000248,WBGENE00000379,WBGENE00000390,WBGENE00000915,WBGENE00001167,WBGENE00001168,WBGENE00001509,WBGENE00001678,WBGENE00002005,WBGENE00002007,WBGENE00002008,WBGENE00002010,WBGENE00002219,WBGENE00003367,WBGENE00003580,WBGENE00003818,WBGENE00004266,WBGENE00004269,WBGENE00004271,WBGENE00004272,WBGENE00004273,WBGENE00004274,WBGENE000…
GO:MF	pyrophosphatase activity	GO:0016462	7.89e-05	4.10283	318	1536	76	11339	WBGENE00000182,WBGENE00000183,WBGENE00000184,WBGENE00000187,WBGENE00000248,WBGENE00000379,WBGENE00000390,WBGENE00000915,WBGENE00001167,WBGENE00001168,WBGENE00001509,WBGENE00001678,WBGENE00002005,WBGENE00002007,WBGENE00002008,WBGENE00002010,WBGENE00002219,WBGENE00003367,WBGENE00003818,WBGENE00004266,WBGENE00004269,WBGENE00004271,WBGENE00004272,WBGENE00004273,WBGENE00004274,WBGENE00004283,WBGENE000…
GO:MF	ubiquitin-like protein transferase activity	GO:0019787	9.72e-05	4.01221	127	1536	39	11339	WBGENE00000500,WBGENE00001574,WBGENE00002344,WBGENE00003917,WBGENE00004320,WBGENE00004759,WBGENE00004768,WBGENE00006702,WBGENE00006703,WBGENE00006704,WBGENE00006707,WBGENE00006713,WBGENE00006715,WBGENE00006719,WBGENE00006720,WBGENE00006734,WBGENE00007009,WBGENE00007574,WBGENE00007626,WBGENE00007643,WBGENE00008330,WBGENE00008429,WBGENE00008433,WBGENE00008871,WBGENE00012678,WBGENE00012933,WBGENE000…
GO:MF	protein binding	GO:0005515	0.000207	3.68443	3013	1536	487	11339	WBGENE00000007,WBGENE00000150,WBGENE00000155,WBGENE00000158,WBGENE00000160,WBGENE00000198,WBGENE00000226,WBGENE00000236,WBGENE00000257,WBGENE00000293,WBGENE00000376,WBGENE00000379,WBGENE00000500,WBGENE00000548,WBGENE00000567,WBGENE00000777,WBGENE00000802,WBGENE00000836,WBGENE00000837,WBGENE00000838,WBGENE00000875,WBGENE00000915,WBGENE00000939,WBGENE00000962,WBGENE00001007,WBGENE00001029,WBGENE000…
GO:MF	primary active transmembrane transporter activity	GO:0015399	0.000333	3.47698	104	1536	33	11339	WBGENE00000019,WBGENE00000020,WBGENE00000023,WBGENE00001303,WBGENE00001812,WBGENE00002162,WBGENE00003153,WBGENE00003831,WBGENE00004063,WBGENE00004736,WBGENE00006519,WBGENE00006917,WBGENE00006918,WBGENE00006919,WBGENE00006920,WBGENE00007060,WBGENE00007248,WBGENE00007631,WBGENE00008950,WBGENE00009920,WBGENE00009992,WBGENE00010130,WBGENE00012354,WBGENE00012376,WBGENE00012925,WBGENE00013025,WBGENE000…
GO:MF	lipid transporter activity	GO:0005319	0.000369	3.43241	48	1536	20	11339	WBGENE00000019,WBGENE00000020,WBGENE00000023,WBGENE00007144,WBGENE00008832,WBGENE00008856,WBGENE00009218,WBGENE00009498,WBGENE00009753,WBGENE00012360,WBGENE00012930,WBGENE00013034,WBGENE00013052,WBGENE00016331,WBGENE00018632,WBGENE00019530,WBGENE00019531,WBGENE00021854,WBGENE00022155,WBGENE00022347
GO:MF	active transmembrane transporter activity	GO:0022804	0.000425	3.37129	200	1536	52	11339	WBGENE00000019,WBGENE00000020,WBGENE00000023,WBGENE00001303,WBGENE00001812,WBGENE00002162,WBGENE00003153,WBGENE00003735,WBGENE00003831,WBGENE00004063,WBGENE00004736,WBGENE00004901,WBGENE00004904,WBGENE00004906,WBGENE00004908,WBGENE00004909,WBGENE00005025,WBGENE00006439,WBGENE00006504,WBGENE00006519,WBGENE00006917,WBGENE00006918,WBGENE00006919,WBGENE00006920,WBGENE00007060,WBGENE00007248,WBGENE000…
GO:MF	proton-transporting ATP synthase activity, rotational mechanism	GO:0046933	0.000993	3.00321	10	1536	8	11339	WBGENE00000229,WBGENE00000230,WBGENE00010419,WBGENE00011273,WBGENE00013025,WBGENE00017982,WBGENE00019061,WBGENE00022089
GO:MF	GTP binding	GO:0005525	0.001061	2.9741	169	1536	45	11339	WBGENE00000182,WBGENE00000183,WBGENE00000184,WBGENE00000187,WBGENE00000248,WBGENE00000390,WBGENE00001167,WBGENE00001168,WBGENE00001509,WBGENE00001678,WBGENE00004266,WBGENE00004269,WBGENE00004271,WBGENE00004272,WBGENE00004273,WBGENE00004274,WBGENE00004283,WBGENE00004302,WBGENE00004357,WBGENE00004373,WBGENE00006414,WBGENE00006528,WBGENE00006536,WBGENE00006537,WBGENE00006540,WBGENE00006795,WBGENE000…
GO:MF	proteasome-activating activity	GO:0036402	0.001489	2.82718	8	1536	7	11339	WBGENE00004501,WBGENE00004502,WBGENE00004503,WBGENE00004504,WBGENE00004505,WBGENE00004506,WBGENE00015688
GO:MF	guanyl ribonucleotide binding	GO:0032561	0.003335	2.47684	176	1536	45	11339	WBGENE00000182,WBGENE00000183,WBGENE00000184,WBGENE00000187,WBGENE00000248,WBGENE00000390,WBGENE00001167,WBGENE00001168,WBGENE00001509,WBGENE00001678,WBGENE00004266,WBGENE00004269,WBGENE00004271,WBGENE00004272,WBGENE00004273,WBGENE00004274,WBGENE00004283,WBGENE00004302,WBGENE00004357,WBGENE00004373,WBGENE00006414,WBGENE00006528,WBGENE00006536,WBGENE00006537,WBGENE00006540,WBGENE00006795,WBGENE000…
GO:MF	S-acyltransferase activity	GO:0016417	0.003595	2.4443	20	1536	11	11339	WBGENE00004964,WBGENE00007637,WBGENE00007824,WBGENE00009082,WBGENE00010323,WBGENE00010892,WBGENE00015164,WBGENE00018009,WBGENE00019257,WBGENE00020066,WBGENE00020950
GO:MF	signal sequence binding	GO:0005048	0.004046	2.39295	17	1536	10	11339	WBGENE00003793,WBGENE00008164,WBGENE00008857,WBGENE00009012,WBGENE00009313,WBGENE00009956,WBGENE00010097,WBGENE00013311,WBGENE00016195,WBGENE00017799
GO:MF	ATP hydrolysis activity	GO:0016887	0.013248	1.87786	132	1536	35	11339	WBGENE00000379,WBGENE00000915,WBGENE00002005,WBGENE00002007,WBGENE00002008,WBGENE00002010,WBGENE00002219,WBGENE00003367,WBGENE00003818,WBGENE00004297,WBGENE00004373,WBGENE00004501,WBGENE00004502,WBGENE00004503,WBGENE00004504,WBGENE00004505,WBGENE00004506,WBGENE00006059,WBGENE00006974,WBGENE00007444,WBGENE00008053,WBGENE00008682,WBGENE00010280,WBGENE00010557,WBGENE00010562,WBGENE00010845,WBGENE000…
GO:MF	polyubiquitin modification-dependent protein binding	GO:0031593	0.014837	1.82866	19	1536	10	11339	WBGENE00006733,WBGENE00008053,WBGENE00008852,WBGENE00009878,WBGENE00011834,WBGENE00013924,WBGENE00017733,WBGENE00018586,WBGENE00021733,WBGENE00022800
GO:MF	oxidoreduction-driven active transmembrane transporter activity	GO:0015453	0.017835	1.74872	16	1536	9	11339	WBGENE00002162,WBGENE00003831,WBGENE00006519,WBGENE00009992,WBGENE00012354,WBGENE00012376,WBGENE00016393,WBGENE00020417,WBGENE00021562
GO:MF	ATPase-coupled cation transmembrane transporter activity	GO:0019829	0.019576	1.70828	23	1536	11	11339	WBGENE00003153,WBGENE00004063,WBGENE00004736,WBGENE00006917,WBGENE00006918,WBGENE00006920,WBGENE00007248,WBGENE00010130,WBGENE00013025,WBGENE00018698,WBGENE00022010
GO:MF	enzyme binding	GO:0019899	0.024826	1.6051	252	1536	56	11339	WBGENE00000500,WBGENE00000836,WBGENE00000837,WBGENE00000838,WBGENE00001579,WBGENE00002344,WBGENE00002694,WBGENE00003196,WBGENE00003777,WBGENE00003917,WBGENE00004297,WBGENE00004323,WBGENE00004357,WBGENE00004767,WBGENE00004888,WBGENE00004953,WBGENE00006713,WBGENE00006719,WBGENE00006727,WBGENE00006728,WBGENE00006730,WBGENE00006734,WBGENE00006768,WBGENE00006974,WBGENE00006999,WBGENE00007278,WBGENE000…
GO:MF	guanyl nucleotide binding	GO:0019001	0.025024	1.60164	190	1536	45	11339	WBGENE00000182,WBGENE00000183,WBGENE00000184,WBGENE00000187,WBGENE00000248,WBGENE00000390,WBGENE00001167,WBGENE00001168,WBGENE00001509,WBGENE00001678,WBGENE00004266,WBGENE00004269,WBGENE00004271,WBGENE00004272,WBGENE00004273,WBGENE00004274,WBGENE00004283,WBGENE00004302,WBGENE00004357,WBGENE00004373,WBGENE00006414,WBGENE00006528,WBGENE00006536,WBGENE00006537,WBGENE00006540,WBGENE00006795,WBGENE000…
GO:MF	phospholipid transporter activity	GO:0005548	0.033348	1.47693	17	1536	9	11339	WBGENE00007144,WBGENE00008856,WBGENE00009753,WBGENE00013034,WBGENE00013052,WBGENE00019530,WBGENE00019531,WBGENE00021854,WBGENE00022155
GO:MF	ATPase activity, coupled to transmembrane movement of ions, rotational mechanism	GO:0044769	0.034232	1.46557	8	1536	6	11339	WBGENE00006917,WBGENE00006918,WBGENE00006920,WBGENE00010130,WBGENE00013025,WBGENE00018698
GO:MF	protein transmembrane transporter activity	GO:0008320	0.034232	1.46557	8	1536	6	11339	WBGENE00001303,WBGENE00007686,WBGENE00008164,WBGENE00008857,WBGENE00009313,WBGENE00013311
GO:MF	ATPase-coupled ion transmembrane transporter activity	GO:0042625	0.034232	1.46557	8	1536	6	11339	WBGENE00006917,WBGENE00006918,WBGENE00006920,WBGENE00010130,WBGENE00013025,WBGENE00018698
GO:MF	proton-transporting ATPase activity, rotational mechanism	GO:0046961	0.034232	1.46557	8	1536	6	11339	WBGENE00006917,WBGENE00006918,WBGENE00006920,WBGENE00010130,WBGENE00013025,WBGENE00018698
GO:MF	protein transporter activity	GO:0140318	0.034232	1.46557	8	1536	6	11339	WBGENE00001303,WBGENE00007686,WBGENE00008164,WBGENE00008857,WBGENE00009313,WBGENE00013311
GO:MF	pyrophosphate hydrolysis-driven proton transmembrane transporter activity	GO:0009678	0.034232	1.46557	8	1536	6	11339	WBGENE00006917,WBGENE00006918,WBGENE00006920,WBGENE00010130,WBGENE00013025,WBGENE00018698
GO:MF	ubiquitin-like protein ligase binding	GO:0044389	0.034691	1.45979	28	1536	12	11339	WBGENE00000500,WBGENE00000836,WBGENE00000837,WBGENE00000838,WBGENE00002344,WBGENE00004888,WBGENE00006713,WBGENE00006719,WBGENE00006727,WBGENE00006728,WBGENE00006734,WBGENE00015567
GO:BP	phosphorus metabolic process	GO:0006793	2.31e-58	57.6371	1154	1441	365	10296	WBGENE00000099,WBGENE00000101,WBGENE00000102,WBGENE00000184,WBGENE00000206,WBGENE00000209,WBGENE00000226,WBGENE00000229,WBGENE00000230,WBGENE00000275,WBGENE00000389,WBGENE00000405,WBGENE00000407,WBGENE00000410,WBGENE00000517,WBGENE00000548,WBGENE00000869,WBGENE00001487,WBGENE00001526,WBGENE00001538,WBGENE00001746,WBGENE00002147,WBGENE00002162,WBGENE00002191,WBGENE00002193,WBGENE00002198,WBGENE000…
GO:BP	phosphate-containing compound metabolic process	GO:0006796	4.51e-58	57.3459	1142	1441	362	10296	WBGENE00000099,WBGENE00000101,WBGENE00000102,WBGENE00000184,WBGENE00000206,WBGENE00000209,WBGENE00000226,WBGENE00000229,WBGENE00000230,WBGENE00000275,WBGENE00000389,WBGENE00000405,WBGENE00000407,WBGENE00000410,WBGENE00000517,WBGENE00000548,WBGENE00000869,WBGENE00001487,WBGENE00001526,WBGENE00001538,WBGENE00001746,WBGENE00002147,WBGENE00002162,WBGENE00002191,WBGENE00002193,WBGENE00002198,WBGENE000…
GO:BP	cellular protein modification process	GO:0006464	4.43e-54	53.3535	1325	1441	391	10296	WBGENE00000099,WBGENE00000102,WBGENE00000226,WBGENE00000259,WBGENE00000275,WBGENE00000389,WBGENE00000405,WBGENE00000407,WBGENE00000410,WBGENE00000500,WBGENE00000517,WBGENE00000548,WBGENE00000885,WBGENE00001112,WBGENE00001426,WBGENE00001427,WBGENE00001431,WBGENE00001487,WBGENE00001505,WBGENE00001511,WBGENE00001526,WBGENE00001538,WBGENE00001632,WBGENE00001639,WBGENE00001645,WBGENE00001746,WBGENE000…
GO:BP	protein modification process	GO:0036211	4.43e-54	53.3535	1325	1441	391	10296	WBGENE00000099,WBGENE00000102,WBGENE00000226,WBGENE00000259,WBGENE00000275,WBGENE00000389,WBGENE00000405,WBGENE00000407,WBGENE00000410,WBGENE00000500,WBGENE00000517,WBGENE00000548,WBGENE00000885,WBGENE00001112,WBGENE00001426,WBGENE00001427,WBGENE00001431,WBGENE00001487,WBGENE00001505,WBGENE00001511,WBGENE00001526,WBGENE00001538,WBGENE00001632,WBGENE00001639,WBGENE00001645,WBGENE00001746,WBGENE000…
GO:BP	macromolecule modification	GO:0043412	8.91e-48	47.0503	1440	1441	400	10296	WBGENE00000099,WBGENE00000102,WBGENE00000226,WBGENE00000259,WBGENE00000275,WBGENE00000389,WBGENE00000405,WBGENE00000407,WBGENE00000410,WBGENE00000500,WBGENE00000517,WBGENE00000548,WBGENE00000885,WBGENE00001112,WBGENE00001426,WBGENE00001427,WBGENE00001431,WBGENE00001487,WBGENE00001505,WBGENE00001511,WBGENE00001526,WBGENE00001538,WBGENE00001632,WBGENE00001639,WBGENE00001645,WBGENE00001746,WBGENE000…
GO:BP	protein dephosphorylation	GO:0006470	6.16e-33	32.2103	188	1441	98	10296	WBGENE00000389,WBGENE00000548,WBGENE00004084,WBGENE00004086,WBGENE00007354,WBGENE00007415,WBGENE00007554,WBGENE00007610,WBGENE00007697,WBGENE00007699,WBGENE00007700,WBGENE00007763,WBGENE00008124,WBGENE00008166,WBGENE00008661,WBGENE00009054,WBGENE00009079,WBGENE00009101,WBGENE00009129,WBGENE00009401,WBGENE00009492,WBGENE00009548,WBGENE00009605,WBGENE00009701,WBGENE00009893,WBGENE00010072,WBGENE000…
GO:BP	peptidyl-serine phosphorylation	GO:0018105	9.72e-26	25.0123	115	1441	67	10296	WBGENE00003403,WBGENE00004960,WBGENE00006579,WBGENE00007049,WBGENE00007269,WBGENE00007305,WBGENE00007335,WBGENE00007448,WBGENE00007563,WBGENE00007777,WBGENE00007791,WBGENE00008235,WBGENE00008423,WBGENE00008662,WBGENE00009115,WBGENE00009402,WBGENE00010366,WBGENE00010719,WBGENE00010874,WBGENE00010883,WBGENE00011191,WBGENE00011466,WBGENE00012169,WBGENE00012307,WBGENE00012637,WBGENE00013978,WBGENE000…
GO:BP	peptidyl-serine modification	GO:0018209	2e-25	24.6999	116	1441	67	10296	WBGENE00003403,WBGENE00004960,WBGENE00006579,WBGENE00007049,WBGENE00007269,WBGENE00007305,WBGENE00007335,WBGENE00007448,WBGENE00007563,WBGENE00007777,WBGENE00007791,WBGENE00008235,WBGENE00008423,WBGENE00008662,WBGENE00009115,WBGENE00009402,WBGENE00010366,WBGENE00010719,WBGENE00010874,WBGENE00010883,WBGENE00011191,WBGENE00011466,WBGENE00012169,WBGENE00012307,WBGENE00012637,WBGENE00013978,WBGENE000…
GO:BP	peptidyl-tyrosine dephosphorylation	GO:0035335	2.67e-24	23.574	90	1441	57	10296	WBGENE00000389,WBGENE00000548,WBGENE00004084,WBGENE00007415,WBGENE00007610,WBGENE00007697,WBGENE00008661,WBGENE00009129,WBGENE00009401,WBGENE00009492,WBGENE00009548,WBGENE00009605,WBGENE00010072,WBGENE00010136,WBGENE00010634,WBGENE00010636,WBGENE00010869,WBGENE00010876,WBGENE00011918,WBGENE00012138,WBGENE00012173,WBGENE00012689,WBGENE00013304,WBGENE00013388,WBGENE00013586,WBGENE00013771,WBGENE000…
GO:BP	dephosphorylation	GO:0016311	4.05e-24	23.3921	260	1441	106	10296	WBGENE00000389,WBGENE00000548,WBGENE00004084,WBGENE00004086,WBGENE00007354,WBGENE00007415,WBGENE00007548,WBGENE00007554,WBGENE00007610,WBGENE00007697,WBGENE00007699,WBGENE00007700,WBGENE00007763,WBGENE00007912,WBGENE00008124,WBGENE00008166,WBGENE00008661,WBGENE00009054,WBGENE00009079,WBGENE00009101,WBGENE00009129,WBGENE00009264,WBGENE00009401,WBGENE00009492,WBGENE00009548,WBGENE00009605,WBGENE000…
GO:BP	phosphorylation	GO:0016310	9.41e-24	23.0263	629	1441	188	10296	WBGENE00000099,WBGENE00000101,WBGENE00000102,WBGENE00000226,WBGENE00000275,WBGENE00000405,WBGENE00000407,WBGENE00000410,WBGENE00000517,WBGENE00001487,WBGENE00001526,WBGENE00001538,WBGENE00001746,WBGENE00002147,WBGENE00002162,WBGENE00002191,WBGENE00002193,WBGENE00002198,WBGENE00002201,WBGENE00002202,WBGENE00002204,WBGENE00002206,WBGENE00002208,WBGENE00002238,WBGENE00002583,WBGENE00002694,WBGENE000…
GO:BP	peptidyl-amino acid modification	GO:0018193	7.47e-23	22.1269	395	1441	136	10296	WBGENE00000885,WBGENE00001426,WBGENE00001427,WBGENE00001431,WBGENE00002193,WBGENE00002198,WBGENE00002204,WBGENE00002206,WBGENE00002208,WBGENE00002694,WBGENE00003150,WBGENE00003403,WBGENE00004782,WBGENE00004888,WBGENE00004960,WBGENE00004962,WBGENE00004964,WBGENE00006579,WBGENE00006736,WBGENE00007030,WBGENE00007049,WBGENE00007269,WBGENE00007270,WBGENE00007305,WBGENE00007335,WBGENE00007448,WBGENE000…
GO:BP	protein phosphorylation	GO:0006468	3.67e-22	21.4351	511	1441	160	10296	WBGENE00000099,WBGENE00000102,WBGENE00000226,WBGENE00000275,WBGENE00000405,WBGENE00000407,WBGENE00000410,WBGENE00000517,WBGENE00001487,WBGENE00001526,WBGENE00001538,WBGENE00001746,WBGENE00002147,WBGENE00002162,WBGENE00002191,WBGENE00002193,WBGENE00002198,WBGENE00002201,WBGENE00002202,WBGENE00002204,WBGENE00002206,WBGENE00002208,WBGENE00002238,WBGENE00002583,WBGENE00002694,WBGENE00003150,WBGENE000…
GO:BP	macromolecule localization	GO:0033036	1.73e-21	20.7628	689	1441	195	10296	WBGENE00000019,WBGENE00000020,WBGENE00000023,WBGENE00000097,WBGENE00000122,WBGENE00000150,WBGENE00000158,WBGENE00000160,WBGENE00000183,WBGENE00000184,WBGENE00000585,WBGENE00001047,WBGENE00001153,WBGENE00001303,WBGENE00001333,WBGENE00001558,WBGENE00001662,WBGENE00001830,WBGENE00002064,WBGENE00002072,WBGENE00002074,WBGENE00002219,WBGENE00002263,WBGENE00002297,WBGENE00003061,WBGENE00003065,WBGENE000…
GO:BP	organonitrogen compound metabolic process	GO:1901564	2.85e-21	20.5454	3671	1441	687	10296	WBGENE00000097,WBGENE00000099,WBGENE00000102,WBGENE00000155,WBGENE00000206,WBGENE00000209,WBGENE00000226,WBGENE00000229,WBGENE00000230,WBGENE00000254,WBGENE00000259,WBGENE00000275,WBGENE00000376,WBGENE00000389,WBGENE00000405,WBGENE00000407,WBGENE00000410,WBGENE00000500,WBGENE00000517,WBGENE00000534,WBGENE00000543,WBGENE00000548,WBGENE00000770,WBGENE00000771,WBGENE00000800,WBGENE00000836,WBGENE000…
GO:BP	ATP metabolic process	GO:0046034	4.4e-21	20.3566	79	1441	50	10296	WBGENE00000206,WBGENE00000209,WBGENE00000229,WBGENE00000230,WBGENE00000869,WBGENE00002162,WBGENE00003061,WBGENE00003831,WBGENE00004959,WBGENE00006601,WBGENE00006768,WBGENE00006919,WBGENE00007385,WBGENE00007880,WBGENE00008230,WBGENE00008780,WBGENE00009051,WBGENE00009126,WBGENE00009161,WBGENE00009739,WBGENE00009992,WBGENE00010419,WBGENE00011015,WBGENE00011273,WBGENE00011510,WBGENE00011884,WBGENE000…
GO:BP	organic substance transport	GO:0071702	2.67e-20	19.5731	678	1441	190	10296	WBGENE00000007,WBGENE00000019,WBGENE00000020,WBGENE00000023,WBGENE00000097,WBGENE00000122,WBGENE00000150,WBGENE00000158,WBGENE00000160,WBGENE00000169,WBGENE00000183,WBGENE00000184,WBGENE00000585,WBGENE00001047,WBGENE00001303,WBGENE00001558,WBGENE00001662,WBGENE00001812,WBGENE00002072,WBGENE00002074,WBGENE00002263,WBGENE00003793,WBGENE00003806,WBGENE00003818,WBGENE00004109,WBGENE00004266,WBGENE000…
GO:BP	cellular protein metabolic process	GO:0044267	4.52e-18	17.3444	2822	1441	546	10296	WBGENE00000097,WBGENE00000099,WBGENE00000102,WBGENE00000155,WBGENE00000226,WBGENE00000259,WBGENE00000275,WBGENE00000376,WBGENE00000389,WBGENE00000405,WBGENE00000407,WBGENE00000410,WBGENE00000500,WBGENE00000517,WBGENE00000534,WBGENE00000548,WBGENE00000770,WBGENE00000771,WBGENE00000800,WBGENE00000836,WBGENE00000837,WBGENE00000838,WBGENE00000885,WBGENE00001094,WBGENE00001112,WBGENE00001168,WBGENE000…
GO:BP	aerobic respiration	GO:0009060	1.17e-17	16.9305	63	1441	41	10296	WBGENE00000041,WBGENE00000230,WBGENE00000869,WBGENE00001503,WBGENE00002162,WBGENE00003061,WBGENE00003162,WBGENE00003225,WBGENE00003831,WBGENE00006433,WBGENE00007880,WBGENE00009051,WBGENE00009161,WBGENE00009440,WBGENE00009664,WBGENE00009739,WBGENE00009992,WBGENE00010317,WBGENE00011273,WBGENE00012354,WBGENE00012553,WBGENE00013308,WBGENE00013406,WBGENE00014086,WBGENE00015755,WBGENE00015810,WBGENE000…
GO:BP	establishment of localization in cell	GO:0051649	2.06e-17	16.6855	542	1441	156	10296	WBGENE00000097,WBGENE00000101,WBGENE00000122,WBGENE00000150,WBGENE00000158,WBGENE00000160,WBGENE00000183,WBGENE00000184,WBGENE00000230,WBGENE00000869,WBGENE00001007,WBGENE00001047,WBGENE00001303,WBGENE00001662,WBGENE00002036,WBGENE00002070,WBGENE00002072,WBGENE00002074,WBGENE00002214,WBGENE00002845,WBGENE00003060,WBGENE00003576,WBGENE00003793,WBGENE00003805,WBGENE00003806,WBGENE00003902,WBGENE000…
GO:BP	cellular localization	GO:0051641	2.48e-17	16.6059	690	1441	185	10296	WBGENE00000097,WBGENE00000101,WBGENE00000122,WBGENE00000150,WBGENE00000158,WBGENE00000160,WBGENE00000183,WBGENE00000184,WBGENE00000230,WBGENE00000869,WBGENE00001007,WBGENE00001047,WBGENE00001303,WBGENE00001333,WBGENE00001662,WBGENE00001996,WBGENE00002036,WBGENE00002070,WBGENE00002072,WBGENE00002074,WBGENE00002214,WBGENE00002219,WBGENE00002845,WBGENE00003060,WBGENE00003576,WBGENE00003793,WBGENE000…
GO:BP	nitrogen compound transport	GO:0071705	5.51e-17	16.259	542	1441	155	10296	WBGENE00000007,WBGENE00000097,WBGENE00000122,WBGENE00000150,WBGENE00000158,WBGENE00000160,WBGENE00000183,WBGENE00000184,WBGENE00000585,WBGENE00001047,WBGENE00001303,WBGENE00001558,WBGENE00001662,WBGENE00001812,WBGENE00002072,WBGENE00002074,WBGENE00003793,WBGENE00003806,WBGENE00003818,WBGENE00004109,WBGENE00004266,WBGENE00004272,WBGENE00004274,WBGENE00004357,WBGENE00004373,WBGENE00004754,WBGENE000…
GO:BP	modification-dependent protein catabolic process	GO:0019941	5.68e-17	16.2459	217	1441	84	10296	WBGENE00000097,WBGENE00000500,WBGENE00000836,WBGENE00000837,WBGENE00000838,WBGENE00002344,WBGENE00003917,WBGENE00003922,WBGENE00003925,WBGENE00003926,WBGENE00003927,WBGENE00003928,WBGENE00003947,WBGENE00004109,WBGENE00004320,WBGENE00004458,WBGENE00004461,WBGENE00004464,WBGENE00004465,WBGENE00004504,WBGENE00004506,WBGENE00004759,WBGENE00004768,WBGENE00004807,WBGENE00004808,WBGENE00006699,WBGENE000…
GO:BP	ubiquitin-dependent protein catabolic process	GO:0006511	5.81e-17	16.2361	213	1441	83	10296	WBGENE00000097,WBGENE00000500,WBGENE00000836,WBGENE00000837,WBGENE00000838,WBGENE00002344,WBGENE00003917,WBGENE00003922,WBGENE00003925,WBGENE00003926,WBGENE00003927,WBGENE00003928,WBGENE00003947,WBGENE00004109,WBGENE00004320,WBGENE00004458,WBGENE00004461,WBGENE00004464,WBGENE00004465,WBGENE00004504,WBGENE00004506,WBGENE00004759,WBGENE00004768,WBGENE00004807,WBGENE00004808,WBGENE00006699,WBGENE000…
GO:BP	intracellular transport	GO:0046907	6.19e-17	16.2083	445	1441	135	10296	WBGENE00000097,WBGENE00000101,WBGENE00000122,WBGENE00000150,WBGENE00000158,WBGENE00000160,WBGENE00000183,WBGENE00000184,WBGENE00000230,WBGENE00000869,WBGENE00001007,WBGENE00001047,WBGENE00001303,WBGENE00001662,WBGENE00002036,WBGENE00002070,WBGENE00002072,WBGENE00002074,WBGENE00003793,WBGENE00003805,WBGENE00003806,WBGENE00003905,WBGENE00004109,WBGENE00004266,WBGENE00004271,WBGENE00004302,WBGENE000…
GO:BP	protein transport	GO:0015031	7.43e-17	16.1293	366	1441	118	10296	WBGENE00000097,WBGENE00000150,WBGENE00000158,WBGENE00000160,WBGENE00000183,WBGENE00000184,WBGENE00000585,WBGENE00001047,WBGENE00001303,WBGENE00001558,WBGENE00001662,WBGENE00002072,WBGENE00002074,WBGENE00003793,WBGENE00003806,WBGENE00003818,WBGENE00004109,WBGENE00004266,WBGENE00004272,WBGENE00004274,WBGENE00004373,WBGENE00004754,WBGENE00004755,WBGENE00004756,WBGENE00004964,WBGENE00004975,WBGENE000…
GO:BP	modification-dependent macromolecule catabolic process	GO:0043632	1.09e-16	15.9637	223	1441	85	10296	WBGENE00000097,WBGENE00000500,WBGENE00000836,WBGENE00000837,WBGENE00000838,WBGENE00002344,WBGENE00003917,WBGENE00003922,WBGENE00003925,WBGENE00003926,WBGENE00003927,WBGENE00003928,WBGENE00003947,WBGENE00004109,WBGENE00004320,WBGENE00004458,WBGENE00004461,WBGENE00004464,WBGENE00004465,WBGENE00004504,WBGENE00004506,WBGENE00004759,WBGENE00004768,WBGENE00004807,WBGENE00004808,WBGENE00006699,WBGENE000…
GO:BP	cellular protein catabolic process	GO:0044257	1.09e-16	15.9613	278	1441	98	10296	WBGENE00000097,WBGENE00000155,WBGENE00000500,WBGENE00000836,WBGENE00000837,WBGENE00000838,WBGENE00002344,WBGENE00003917,WBGENE00003922,WBGENE00003925,WBGENE00003926,WBGENE00003927,WBGENE00003928,WBGENE00003947,WBGENE00003948,WBGENE00003951,WBGENE00003952,WBGENE00003953,WBGENE00004109,WBGENE00004320,WBGENE00004458,WBGENE00004461,WBGENE00004464,WBGENE00004465,WBGENE00004504,WBGENE00004506,WBGENE000…
GO:BP	establishment of protein localization	GO:0045184	1.7e-16	15.7702	374	1441	119	10296	WBGENE00000097,WBGENE00000150,WBGENE00000158,WBGENE00000160,WBGENE00000183,WBGENE00000184,WBGENE00000585,WBGENE00001047,WBGENE00001303,WBGENE00001558,WBGENE00001662,WBGENE00002072,WBGENE00002074,WBGENE00003793,WBGENE00003806,WBGENE00003818,WBGENE00004109,WBGENE00004266,WBGENE00004272,WBGENE00004274,WBGENE00004373,WBGENE00004754,WBGENE00004755,WBGENE00004756,WBGENE00004964,WBGENE00004975,WBGENE000…
GO:BP	proteolysis involved in cellular protein catabolic process	GO:0051603	3.52e-16	15.4537	269	1441	95	10296	WBGENE00000097,WBGENE00000155,WBGENE00000500,WBGENE00000836,WBGENE00000837,WBGENE00000838,WBGENE00002344,WBGENE00003917,WBGENE00003922,WBGENE00003925,WBGENE00003926,WBGENE00003927,WBGENE00003928,WBGENE00003947,WBGENE00003948,WBGENE00003951,WBGENE00003952,WBGENE00003953,WBGENE00004109,WBGENE00004320,WBGENE00004458,WBGENE00004461,WBGENE00004464,WBGENE00004465,WBGENE00004504,WBGENE00004506,WBGENE000…
GO:BP	protein localization	GO:0008104	4.6e-16	15.3369	548	1441	154	10296	WBGENE00000097,WBGENE00000150,WBGENE00000158,WBGENE00000160,WBGENE00000183,WBGENE00000184,WBGENE00000585,WBGENE00001047,WBGENE00001303,WBGENE00001333,WBGENE00001558,WBGENE00001662,WBGENE00001830,WBGENE00002064,WBGENE00002072,WBGENE00002074,WBGENE00002219,WBGENE00002297,WBGENE00003777,WBGENE00003793,WBGENE00003806,WBGENE00003818,WBGENE00003917,WBGENE00004101,WBGENE00004109,WBGENE00004266,WBGENE000…
GO:BP	protein catabolic process	GO:0030163	7.66e-16	15.116	316	1441	105	10296	WBGENE00000097,WBGENE00000155,WBGENE00000500,WBGENE00000836,WBGENE00000837,WBGENE00000838,WBGENE00002344,WBGENE00003917,WBGENE00003922,WBGENE00003925,WBGENE00003926,WBGENE00003927,WBGENE00003928,WBGENE00003947,WBGENE00003948,WBGENE00003951,WBGENE00003952,WBGENE00003953,WBGENE00004109,WBGENE00004320,WBGENE00004458,WBGENE00004460,WBGENE00004461,WBGENE00004464,WBGENE00004465,WBGENE00004501,WBGENE000…
GO:BP	organic substance catabolic process	GO:1901575	3.7e-15	14.4317	715	1441	184	10296	WBGENE00000097,WBGENE00000155,WBGENE00000376,WBGENE00000500,WBGENE00000836,WBGENE00000837,WBGENE00000838,WBGENE00000939,WBGENE00001153,WBGENE00002344,WBGENE00002845,WBGENE00003906,WBGENE00003917,WBGENE00003922,WBGENE00003925,WBGENE00003926,WBGENE00003927,WBGENE00003928,WBGENE00003947,WBGENE00003948,WBGENE00003951,WBGENE00003952,WBGENE00003953,WBGENE00004040,WBGENE00004109,WBGENE00004320,WBGENE000…
GO:BP	cellular protein localization	GO:0034613	1.21e-14	13.919	383	1441	117	10296	WBGENE00000097,WBGENE00000150,WBGENE00000158,WBGENE00000160,WBGENE00000183,WBGENE00000184,WBGENE00001047,WBGENE00001303,WBGENE00001333,WBGENE00001662,WBGENE00002072,WBGENE00002074,WBGENE00002219,WBGENE00003793,WBGENE00003806,WBGENE00004101,WBGENE00004109,WBGENE00004266,WBGENE00004272,WBGENE00004373,WBGENE00004754,WBGENE00004755,WBGENE00004756,WBGENE00004888,WBGENE00004953,WBGENE00004955,WBGENE000…
GO:BP	cellular respiration	GO:0045333	1.37e-14	13.864	72	1441	41	10296	WBGENE00000041,WBGENE00000230,WBGENE00000869,WBGENE00001503,WBGENE00002162,WBGENE00003061,WBGENE00003162,WBGENE00003225,WBGENE00003831,WBGENE00006433,WBGENE00007880,WBGENE00009051,WBGENE00009161,WBGENE00009440,WBGENE00009664,WBGENE00009739,WBGENE00009992,WBGENE00010317,WBGENE00011273,WBGENE00012354,WBGENE00012553,WBGENE00013308,WBGENE00013406,WBGENE00014086,WBGENE00015755,WBGENE00015810,WBGENE000…
GO:BP	cellular macromolecule localization	GO:0070727	1.5e-14	13.8225	384	1441	117	10296	WBGENE00000097,WBGENE00000150,WBGENE00000158,WBGENE00000160,WBGENE00000183,WBGENE00000184,WBGENE00001047,WBGENE00001303,WBGENE00001333,WBGENE00001662,WBGENE00002072,WBGENE00002074,WBGENE00002219,WBGENE00003793,WBGENE00003806,WBGENE00004101,WBGENE00004109,WBGENE00004266,WBGENE00004272,WBGENE00004373,WBGENE00004754,WBGENE00004755,WBGENE00004756,WBGENE00004888,WBGENE00004953,WBGENE00004955,WBGENE000…
GO:BP	generation of precursor metabolites and energy	GO:0006091	2.68e-14	13.5718	124	1441	56	10296	WBGENE00000041,WBGENE00000230,WBGENE00000869,WBGENE00001503,WBGENE00002162,WBGENE00002855,WBGENE00003061,WBGENE00003162,WBGENE00003225,WBGENE00003831,WBGENE00006433,WBGENE00006601,WBGENE00007880,WBGENE00008230,WBGENE00008780,WBGENE00009051,WBGENE00009126,WBGENE00009161,WBGENE00009187,WBGENE00009440,WBGENE00009583,WBGENE00009664,WBGENE00009739,WBGENE00009992,WBGENE00010317,WBGENE00010665,WBGENE000…
GO:BP	intracellular protein transport	GO:0006886	3.98e-14	13.4004	255	1441	88	10296	WBGENE00000097,WBGENE00000150,WBGENE00000158,WBGENE00000160,WBGENE00000183,WBGENE00000184,WBGENE00001047,WBGENE00001303,WBGENE00001662,WBGENE00002072,WBGENE00002074,WBGENE00003793,WBGENE00003806,WBGENE00004109,WBGENE00004266,WBGENE00004754,WBGENE00004755,WBGENE00004756,WBGENE00004964,WBGENE00004975,WBGENE00006373,WBGENE00007637,WBGENE00007683,WBGENE00007686,WBGENE00007696,WBGENE00007927,WBGENE000…
GO:BP	protein metabolic process	GO:0019538	8.37e-14	13.0771	3200	1441	585	10296	WBGENE00000097,WBGENE00000099,WBGENE00000102,WBGENE00000155,WBGENE00000226,WBGENE00000254,WBGENE00000259,WBGENE00000275,WBGENE00000376,WBGENE00000389,WBGENE00000405,WBGENE00000407,WBGENE00000410,WBGENE00000500,WBGENE00000517,WBGENE00000534,WBGENE00000543,WBGENE00000548,WBGENE00000770,WBGENE00000771,WBGENE00000800,WBGENE00000836,WBGENE00000837,WBGENE00000838,WBGENE00000885,WBGENE00001056,WBGENE000…
GO:BP	organonitrogen compound catabolic process	GO:1901565	8.74e-14	13.0583	431	1441	125	10296	WBGENE00000097,WBGENE00000155,WBGENE00000500,WBGENE00000836,WBGENE00000837,WBGENE00000838,WBGENE00002344,WBGENE00003917,WBGENE00003922,WBGENE00003925,WBGENE00003926,WBGENE00003927,WBGENE00003928,WBGENE00003947,WBGENE00003948,WBGENE00003951,WBGENE00003952,WBGENE00003953,WBGENE00004109,WBGENE00004320,WBGENE00004458,WBGENE00004460,WBGENE00004461,WBGENE00004464,WBGENE00004465,WBGENE00004501,WBGENE000…
GO:BP	cellular macromolecule metabolic process	GO:0044260	4.36e-13	12.3607	3256	1441	590	10296	WBGENE00000097,WBGENE00000099,WBGENE00000102,WBGENE00000155,WBGENE00000226,WBGENE00000259,WBGENE00000275,WBGENE00000376,WBGENE00000389,WBGENE00000405,WBGENE00000407,WBGENE00000410,WBGENE00000500,WBGENE00000517,WBGENE00000534,WBGENE00000548,WBGENE00000770,WBGENE00000771,WBGENE00000800,WBGENE00000836,WBGENE00000837,WBGENE00000838,WBGENE00000885,WBGENE00000939,WBGENE00001016,WBGENE00001094,WBGENE000…
GO:BP	energy derivation by oxidation of organic compounds	GO:0015980	5.11e-13	12.2914	91	1441	45	10296	WBGENE00000041,WBGENE00000230,WBGENE00000869,WBGENE00001503,WBGENE00002162,WBGENE00003061,WBGENE00003162,WBGENE00003225,WBGENE00003831,WBGENE00006433,WBGENE00007880,WBGENE00009051,WBGENE00009161,WBGENE00009440,WBGENE00009583,WBGENE00009664,WBGENE00009739,WBGENE00009992,WBGENE00010317,WBGENE00010665,WBGENE00011273,WBGENE00012354,WBGENE00012553,WBGENE00013308,WBGENE00013406,WBGENE00014086,WBGENE000…
GO:BP	membrane organization	GO:0061024	1.41e-12	11.8515	169	1441	65	10296	WBGENE00000875,WBGENE00001414,WBGENE00001662,WBGENE00003806,WBGENE00004205,WBGENE00004271,WBGENE00004272,WBGENE00004274,WBGENE00004754,WBGENE00004755,WBGENE00004756,WBGENE00004899,WBGENE00004958,WBGENE00004964,WBGENE00006311,WBGENE00006373,WBGENE00006491,WBGENE00006565,WBGENE00007144,WBGENE00007696,WBGENE00008164,WBGENE00008856,WBGENE00009119,WBGENE00009478,WBGENE00009498,WBGENE00009753,WBGENE000…
GO:BP	macromolecule catabolic process	GO:0009057	1.6e-12	11.7965	436	1441	123	10296	WBGENE00000097,WBGENE00000155,WBGENE00000376,WBGENE00000500,WBGENE00000836,WBGENE00000837,WBGENE00000838,WBGENE00000939,WBGENE00002344,WBGENE00002845,WBGENE00003917,WBGENE00003922,WBGENE00003925,WBGENE00003926,WBGENE00003927,WBGENE00003928,WBGENE00003947,WBGENE00003948,WBGENE00003951,WBGENE00003952,WBGENE00003953,WBGENE00004109,WBGENE00004320,WBGENE00004458,WBGENE00004460,WBGENE00004461,WBGENE000…
GO:BP	gamete generation	GO:0007276	4.29e-12	11.3677	144	1441	58	10296	WBGENE00000183,WBGENE00000534,WBGENE00000875,WBGENE00001249,WBGENE00001303,WBGENE00001414,WBGENE00001996,WBGENE00002059,WBGENE00002064,WBGENE00002143,WBGENE00002214,WBGENE00002694,WBGENE00002845,WBGENE00003784,WBGENE00003902,WBGENE00003992,WBGENE00004046,WBGENE00004178,WBGENE00004271,WBGENE00004274,WBGENE00004698,WBGENE00004699,WBGENE00004958,WBGENE00004959,WBGENE00004960,WBGENE00004962,WBGENE000…
GO:BP	proteasomal protein catabolic process	GO:0010498	4.34e-12	11.3623	152	1441	60	10296	WBGENE00000097,WBGENE00000500,WBGENE00003917,WBGENE00003926,WBGENE00003947,WBGENE00003948,WBGENE00003953,WBGENE00004458,WBGENE00004461,WBGENE00004464,WBGENE00004504,WBGENE00004506,WBGENE00004759,WBGENE00004768,WBGENE00004807,WBGENE00004808,WBGENE00006703,WBGENE00006704,WBGENE00006707,WBGENE00006715,WBGENE00006724,WBGENE00006733,WBGENE00006734,WBGENE00006856,WBGENE00007009,WBGENE00007333,WBGENE000…
GO:BP	cellular process	GO:0009987	6.79e-12	11.1683	8891	1441	1332	10296	WBGENE00000007,WBGENE00000019,WBGENE00000020,WBGENE00000023,WBGENE00000041,WBGENE00000097,WBGENE00000099,WBGENE00000101,WBGENE00000102,WBGENE00000122,WBGENE00000150,WBGENE00000155,WBGENE00000158,WBGENE00000160,WBGENE00000169,WBGENE00000183,WBGENE00000184,WBGENE00000198,WBGENE00000206,WBGENE00000209,WBGENE00000226,WBGENE00000229,WBGENE00000230,WBGENE00000248,WBGENE00000257,WBGENE00000259,WBGENE000…
GO:BP	cellular macromolecule catabolic process	GO:0044265	8.41e-12	11.075	400	1441	114	10296	WBGENE00000097,WBGENE00000155,WBGENE00000376,WBGENE00000500,WBGENE00000836,WBGENE00000837,WBGENE00000838,WBGENE00000939,WBGENE00002344,WBGENE00002845,WBGENE00003917,WBGENE00003922,WBGENE00003925,WBGENE00003926,WBGENE00003927,WBGENE00003928,WBGENE00003947,WBGENE00003948,WBGENE00003951,WBGENE00003952,WBGENE00003953,WBGENE00004109,WBGENE00004320,WBGENE00004458,WBGENE00004461,WBGENE00004464,WBGENE000…
GO:BP	mitochondrial ATP synthesis coupled electron transport	GO:0042775	1.45e-11	10.8387	35	1441	25	10296	WBGENE00000869,WBGENE00002162,WBGENE00003061,WBGENE00003831,WBGENE00007880,WBGENE00009051,WBGENE00009161,WBGENE00009739,WBGENE00009992,WBGENE00012354,WBGENE00012553,WBGENE00013308,WBGENE00013406,WBGENE00014086,WBGENE00015755,WBGENE00015810,WBGENE00016392,WBGENE00016393,WBGENE00019007,WBGENE00019401,WBGENE00020181,WBGENE00020417,WBGENE00021562,WBGENE00021839,WBGENE00021849
GO:BP	oxidative phosphorylation	GO:0006119	1.53e-11	10.8153	43	1441	28	10296	WBGENE00000230,WBGENE00000869,WBGENE00002162,WBGENE00003061,WBGENE00003831,WBGENE00007880,WBGENE00009051,WBGENE00009161,WBGENE00009739,WBGENE00009992,WBGENE00011273,WBGENE00012354,WBGENE00012553,WBGENE00013308,WBGENE00013406,WBGENE00014086,WBGENE00015755,WBGENE00015810,WBGENE00016392,WBGENE00016393,WBGENE00017982,WBGENE00019007,WBGENE00019401,WBGENE00020181,WBGENE00020417,WBGENE00021562,WBGENE000…
GO:BP	ATP synthesis coupled electron transport	GO:0042773	4.12e-11	10.3854	36	1441	25	10296	WBGENE00000869,WBGENE00002162,WBGENE00003061,WBGENE00003831,WBGENE00007880,WBGENE00009051,WBGENE00009161,WBGENE00009739,WBGENE00009992,WBGENE00012354,WBGENE00012553,WBGENE00013308,WBGENE00013406,WBGENE00014086,WBGENE00015755,WBGENE00015810,WBGENE00016392,WBGENE00016393,WBGENE00019007,WBGENE00019401,WBGENE00020181,WBGENE00020417,WBGENE00021562,WBGENE00021839,WBGENE00021849
GO:BP	aerobic electron transport chain	GO:0019646	4.12e-11	10.3854	36	1441	25	10296	WBGENE00000869,WBGENE00002162,WBGENE00003061,WBGENE00003831,WBGENE00007880,WBGENE00009051,WBGENE00009161,WBGENE00009739,WBGENE00009992,WBGENE00012354,WBGENE00012553,WBGENE00013308,WBGENE00013406,WBGENE00014086,WBGENE00015755,WBGENE00015810,WBGENE00016392,WBGENE00016393,WBGENE00019007,WBGENE00019401,WBGENE00020181,WBGENE00020417,WBGENE00021562,WBGENE00021839,WBGENE00021849
GO:BP	Golgi vesicle transport	GO:0048193	4.22e-11	10.3746	100	1441	45	10296	WBGENE00000158,WBGENE00002070,WBGENE00003806,WBGENE00003905,WBGENE00004272,WBGENE00004754,WBGENE00004755,WBGENE00004756,WBGENE00006373,WBGENE00006565,WBGENE00008687,WBGENE00009498,WBGENE00009654,WBGENE00009732,WBGENE00009783,WBGENE00009829,WBGENE00010178,WBGENE00010496,WBGENE00010670,WBGENE00010699,WBGENE00010713,WBGENE00011338,WBGENE00011775,WBGENE00011835,WBGENE00011975,WBGENE00013360,WBGENE000…
GO:BP	localization	GO:0051179	1.06e-10	9.9765	1988	1441	384	10296	WBGENE00000007,WBGENE00000019,WBGENE00000020,WBGENE00000023,WBGENE00000097,WBGENE00000101,WBGENE00000122,WBGENE00000150,WBGENE00000158,WBGENE00000160,WBGENE00000169,WBGENE00000183,WBGENE00000184,WBGENE00000206,WBGENE00000209,WBGENE00000229,WBGENE00000230,WBGENE00000585,WBGENE00000869,WBGENE00000955,WBGENE00001007,WBGENE00001047,WBGENE00001153,WBGENE00001303,WBGENE00001333,WBGENE00001414,WBGENE000…
GO:BP	catabolic process	GO:0009056	1.24e-10	9.90801	845	1441	194	10296	WBGENE00000097,WBGENE00000155,WBGENE00000376,WBGENE00000500,WBGENE00000836,WBGENE00000837,WBGENE00000838,WBGENE00000939,WBGENE00001153,WBGENE00001424,WBGENE00002344,WBGENE00002583,WBGENE00002845,WBGENE00003906,WBGENE00003917,WBGENE00003922,WBGENE00003925,WBGENE00003926,WBGENE00003927,WBGENE00003928,WBGENE00003947,WBGENE00003948,WBGENE00003951,WBGENE00003952,WBGENE00003953,WBGENE00004040,WBGENE000…
GO:BP	electron transport chain	GO:0022900	1.9e-10	9.72097	52	1441	30	10296	WBGENE00000869,WBGENE00002162,WBGENE00002855,WBGENE00003061,WBGENE00003225,WBGENE00003831,WBGENE00006433,WBGENE00007880,WBGENE00009051,WBGENE00009161,WBGENE00009187,WBGENE00009739,WBGENE00009992,WBGENE00012354,WBGENE00012553,WBGENE00013308,WBGENE00013406,WBGENE00014086,WBGENE00015755,WBGENE00015810,WBGENE00016392,WBGENE00016393,WBGENE00017734,WBGENE00019007,WBGENE00019401,WBGENE00020181,WBGENE000…
GO:BP	male gamete generation	GO:0048232	1.92e-10	9.71558	49	1441	29	10296	WBGENE00001249,WBGENE00001414,WBGENE00002059,WBGENE00004178,WBGENE00004698,WBGENE00004699,WBGENE00004958,WBGENE00004959,WBGENE00004960,WBGENE00004962,WBGENE00004964,WBGENE00004965,WBGENE00004966,WBGENE00004969,WBGENE00004971,WBGENE00004974,WBGENE00004975,WBGENE00006449,WBGENE00006699,WBGENE00007028,WBGENE00007307,WBGENE00007732,WBGENE00007733,WBGENE00011910,WBGENE00013747,WBGENE00016960,WBGENE000…
GO:BP	proteasome-mediated ubiquitin-dependent protein catabolic process	GO:0043161	2.21e-10	9.6547	139	1441	54	10296	WBGENE00000097,WBGENE00000500,WBGENE00003917,WBGENE00003926,WBGENE00003947,WBGENE00004458,WBGENE00004461,WBGENE00004464,WBGENE00004504,WBGENE00004506,WBGENE00004759,WBGENE00004768,WBGENE00004807,WBGENE00004808,WBGENE00006703,WBGENE00006704,WBGENE00006707,WBGENE00006715,WBGENE00006724,WBGENE00006733,WBGENE00006734,WBGENE00006856,WBGENE00007009,WBGENE00007333,WBGENE00007574,WBGENE00007626,WBGENE000…
GO:BP	sexual reproduction	GO:0019953	5.52e-10	9.25803	184	1441	64	10296	WBGENE00000183,WBGENE00000534,WBGENE00000875,WBGENE00001249,WBGENE00001303,WBGENE00001414,WBGENE00001996,WBGENE00002059,WBGENE00002064,WBGENE00002143,WBGENE00002214,WBGENE00002694,WBGENE00002845,WBGENE00003784,WBGENE00003902,WBGENE00003992,WBGENE00004046,WBGENE00004109,WBGENE00004178,WBGENE00004271,WBGENE00004274,WBGENE00004698,WBGENE00004699,WBGENE00004958,WBGENE00004959,WBGENE00004960,WBGENE000…
GO:BP	establishment of localization	GO:0051234	8.23e-10	9.0844	1731	1441	339	10296	WBGENE00000007,WBGENE00000019,WBGENE00000020,WBGENE00000023,WBGENE00000097,WBGENE00000101,WBGENE00000122,WBGENE00000150,WBGENE00000158,WBGENE00000160,WBGENE00000169,WBGENE00000183,WBGENE00000184,WBGENE00000206,WBGENE00000209,WBGENE00000229,WBGENE00000230,WBGENE00000585,WBGENE00000869,WBGENE00000955,WBGENE00001007,WBGENE00001047,WBGENE00001303,WBGENE00001558,WBGENE00001662,WBGENE00001812,WBGENE000…
GO:BP	respiratory electron transport chain	GO:0022904	1.69e-09	8.77114	43	1441	26	10296	WBGENE00000869,WBGENE00002162,WBGENE00003061,WBGENE00003831,WBGENE00006433,WBGENE00007880,WBGENE00009051,WBGENE00009161,WBGENE00009739,WBGENE00009992,WBGENE00012354,WBGENE00012553,WBGENE00013308,WBGENE00013406,WBGENE00014086,WBGENE00015755,WBGENE00015810,WBGENE00016392,WBGENE00016393,WBGENE00019007,WBGENE00019401,WBGENE00020181,WBGENE00020417,WBGENE00021562,WBGENE00021839,WBGENE00021849
GO:BP	peptidyl-tyrosine phosphorylation	GO:0018108	1.72e-09	8.76436	72	1441	35	10296	WBGENE00002193,WBGENE00002198,WBGENE00002204,WBGENE00002206,WBGENE00002208,WBGENE00003150,WBGENE00004962,WBGENE00007270,WBGENE00009039,WBGENE00009160,WBGENE00010712,WBGENE00011039,WBGENE00012010,WBGENE00012011,WBGENE00012172,WBGENE00012785,WBGENE00013475,WBGENE00013801,WBGENE00013811,WBGENE00014813,WBGENE00015994,WBGENE00016085,WBGENE00016416,WBGENE00016462,WBGENE00016954,WBGENE00017736,WBGENE000…
GO:BP	multi-organism reproductive process	GO:0044703	2.19e-09	8.65879	189	1441	64	10296	WBGENE00000183,WBGENE00000534,WBGENE00000875,WBGENE00001249,WBGENE00001303,WBGENE00001414,WBGENE00001996,WBGENE00002059,WBGENE00002064,WBGENE00002143,WBGENE00002214,WBGENE00002694,WBGENE00002845,WBGENE00003784,WBGENE00003902,WBGENE00003992,WBGENE00004046,WBGENE00004109,WBGENE00004178,WBGENE00004271,WBGENE00004274,WBGENE00004698,WBGENE00004699,WBGENE00004958,WBGENE00004959,WBGENE00004960,WBGENE000…
GO:BP	vesicle-mediated transport	GO:0016192	2.53e-09	8.59744	391	1441	106	10296	WBGENE00000101,WBGENE00000150,WBGENE00000158,WBGENE00000160,WBGENE00000183,WBGENE00000184,WBGENE00001558,WBGENE00002070,WBGENE00003060,WBGENE00003153,WBGENE00003806,WBGENE00003818,WBGENE00003905,WBGENE00004109,WBGENE00004205,WBGENE00004271,WBGENE00004272,WBGENE00004274,WBGENE00004373,WBGENE00004754,WBGENE00004755,WBGENE00004756,WBGENE00004899,WBGENE00004969,WBGENE00006373,WBGENE00006565,WBGENE000…
GO:BP	organelle organization	GO:0006996	2.84e-09	8.54618	982	1441	213	10296	WBGENE00000226,WBGENE00000248,WBGENE00000257,WBGENE00000275,WBGENE00000293,WBGENE00000500,WBGENE00000549,WBGENE00000585,WBGENE00000875,WBGENE00000938,WBGENE00001007,WBGENE00001016,WBGENE00001092,WBGENE00001333,WBGENE00001424,WBGENE00001443,WBGENE00001488,WBGENE00001491,WBGENE00001509,WBGENE00001579,WBGENE00001662,WBGENE00001830,WBGENE00001855,WBGENE00001862,WBGENE00001973,WBGENE00002036,WBGENE000…
GO:BP	peptidyl-tyrosine modification	GO:0018212	4.71e-09	8.32661	74	1441	35	10296	WBGENE00002193,WBGENE00002198,WBGENE00002204,WBGENE00002206,WBGENE00002208,WBGENE00003150,WBGENE00004962,WBGENE00007270,WBGENE00009039,WBGENE00009160,WBGENE00010712,WBGENE00011039,WBGENE00012010,WBGENE00012011,WBGENE00012172,WBGENE00012785,WBGENE00013475,WBGENE00013801,WBGENE00013811,WBGENE00014813,WBGENE00015994,WBGENE00016085,WBGENE00016416,WBGENE00016462,WBGENE00016954,WBGENE00017736,WBGENE000…
GO:BP	spermatogenesis	GO:0007283	7.38e-09	8.13182	45	1441	26	10296	WBGENE00001249,WBGENE00001414,WBGENE00002059,WBGENE00004178,WBGENE00004698,WBGENE00004699,WBGENE00004958,WBGENE00004959,WBGENE00004960,WBGENE00004962,WBGENE00004964,WBGENE00004965,WBGENE00004966,WBGENE00004969,WBGENE00004971,WBGENE00004974,WBGENE00004975,WBGENE00006449,WBGENE00006699,WBGENE00007028,WBGENE00007732,WBGENE00011910,WBGENE00013747,WBGENE00016960,WBGENE00017733,WBGENE00018586
GO:BP	cellular metabolic process	GO:0044237	9.36e-09	8.02895	5820	1441	931	10296	WBGENE00000041,WBGENE00000097,WBGENE00000099,WBGENE00000101,WBGENE00000102,WBGENE00000155,WBGENE00000184,WBGENE00000198,WBGENE00000206,WBGENE00000209,WBGENE00000226,WBGENE00000229,WBGENE00000230,WBGENE00000259,WBGENE00000266,WBGENE00000275,WBGENE00000376,WBGENE00000389,WBGENE00000405,WBGENE00000407,WBGENE00000410,WBGENE00000467,WBGENE00000500,WBGENE00000507,WBGENE00000508,WBGENE00000517,WBGENE000…
GO:BP	purine nucleoside triphosphate metabolic process	GO:0009144	3.39e-08	7.47025	27	1441	19	10296	WBGENE00000206,WBGENE00000209,WBGENE00000229,WBGENE00000230,WBGENE00000869,WBGENE00006768,WBGENE00006919,WBGENE00007385,WBGENE00009119,WBGENE00010419,WBGENE00011015,WBGENE00011273,WBGENE00013025,WBGENE00017982,WBGENE00019061,WBGENE00020275,WBGENE00022089,WBGENE00022336,WBGENE00022673
GO:BP	transport	GO:0006810	5.19e-08	7.28443	1690	1441	324	10296	WBGENE00000007,WBGENE00000019,WBGENE00000020,WBGENE00000023,WBGENE00000097,WBGENE00000101,WBGENE00000122,WBGENE00000150,WBGENE00000158,WBGENE00000160,WBGENE00000169,WBGENE00000183,WBGENE00000184,WBGENE00000206,WBGENE00000209,WBGENE00000229,WBGENE00000230,WBGENE00000585,WBGENE00000869,WBGENE00000955,WBGENE00001007,WBGENE00001047,WBGENE00001303,WBGENE00001558,WBGENE00001662,WBGENE00001812,WBGENE000…
GO:BP	cellular catabolic process	GO:0044248	7.12e-08	7.14739	735	1441	165	10296	WBGENE00000097,WBGENE00000155,WBGENE00000376,WBGENE00000500,WBGENE00000836,WBGENE00000837,WBGENE00000838,WBGENE00000939,WBGENE00001153,WBGENE00001424,WBGENE00002344,WBGENE00002583,WBGENE00002845,WBGENE00003917,WBGENE00003922,WBGENE00003925,WBGENE00003926,WBGENE00003927,WBGENE00003928,WBGENE00003947,WBGENE00003948,WBGENE00003951,WBGENE00003952,WBGENE00003953,WBGENE00004109,WBGENE00004266,WBGENE000…
GO:BP	proton transmembrane transport	GO:1902600	7.36e-08	7.13292	69	1441	32	10296	WBGENE00000206,WBGENE00000209,WBGENE00000229,WBGENE00000230,WBGENE00000869,WBGENE00002162,WBGENE00003735,WBGENE00004959,WBGENE00006768,WBGENE00006911,WBGENE00006917,WBGENE00006918,WBGENE00006919,WBGENE00006920,WBGENE00007248,WBGENE00007385,WBGENE00009882,WBGENE00010130,WBGENE00010419,WBGENE00011015,WBGENE00011273,WBGENE00012033,WBGENE00012354,WBGENE00013025,WBGENE00016258,WBGENE00017982,WBGENE000…
GO:BP	purine nucleotide metabolic process	GO:0006163	1.08e-07	6.96484	129	1441	47	10296	WBGENE00000206,WBGENE00000209,WBGENE00000229,WBGENE00000230,WBGENE00000869,WBGENE00002879,WBGENE00004076,WBGENE00006601,WBGENE00006768,WBGENE00006919,WBGENE00007385,WBGENE00007824,WBGENE00007969,WBGENE00008230,WBGENE00008780,WBGENE00009119,WBGENE00009126,WBGENE00009439,WBGENE00010419,WBGENE00010912,WBGENE00011015,WBGENE00011128,WBGENE00011273,WBGENE00011500,WBGENE00011510,WBGENE00011884,WBGENE000…
GO:BP	ribose phosphate metabolic process	GO:0019693	1.26e-07	6.90109	138	1441	49	10296	WBGENE00000206,WBGENE00000209,WBGENE00000229,WBGENE00000230,WBGENE00000869,WBGENE00002879,WBGENE00004076,WBGENE00006601,WBGENE00006768,WBGENE00006919,WBGENE00007089,WBGENE00007385,WBGENE00007824,WBGENE00007969,WBGENE00008230,WBGENE00008780,WBGENE00009119,WBGENE00009126,WBGENE00009439,WBGENE00009575,WBGENE00010419,WBGENE00010912,WBGENE00011015,WBGENE00011128,WBGENE00011273,WBGENE00011500,WBGENE000…
GO:BP	purine-containing compound metabolic process	GO:0072521	1.26e-07	6.90109	138	1441	49	10296	WBGENE00000206,WBGENE00000209,WBGENE00000229,WBGENE00000230,WBGENE00000869,WBGENE00002879,WBGENE00004076,WBGENE00006601,WBGENE00006768,WBGENE00006919,WBGENE00007106,WBGENE00007385,WBGENE00007824,WBGENE00007969,WBGENE00008230,WBGENE00008780,WBGENE00009119,WBGENE00009126,WBGENE00009439,WBGENE00010419,WBGENE00010912,WBGENE00011015,WBGENE00011128,WBGENE00011273,WBGENE00011500,WBGENE00011510,WBGENE000…
GO:BP	ERAD pathway	GO:0036503	1.4e-07	6.85532	37	1441	22	10296	WBGENE00004504,WBGENE00004759,WBGENE00004768,WBGENE00006703,WBGENE00006733,WBGENE00006734,WBGENE00007574,WBGENE00007626,WBGENE00008053,WBGENE00008148,WBGENE00008852,WBGENE00009178,WBGENE00013667,WBGENE00013881,WBGENE00014031,WBGENE00014204,WBGENE00015126,WBGENE00018611,WBGENE00018847,WBGENE00019893,WBGENE00022703,WBGENE00022800
GO:BP	purine ribonucleoside triphosphate biosynthetic process	GO:0009206	1.73e-07	6.76295	26	1441	18	10296	WBGENE00000206,WBGENE00000209,WBGENE00000229,WBGENE00000230,WBGENE00000869,WBGENE00006768,WBGENE00006919,WBGENE00007385,WBGENE00009119,WBGENE00010419,WBGENE00011015,WBGENE00011273,WBGENE00013025,WBGENE00017982,WBGENE00019061,WBGENE00020275,WBGENE00022089,WBGENE00022336
GO:BP	purine ribonucleoside triphosphate metabolic process	GO:0009205	1.73e-07	6.76295	26	1441	18	10296	WBGENE00000206,WBGENE00000209,WBGENE00000229,WBGENE00000230,WBGENE00000869,WBGENE00006768,WBGENE00006919,WBGENE00007385,WBGENE00009119,WBGENE00010419,WBGENE00011015,WBGENE00011273,WBGENE00013025,WBGENE00017982,WBGENE00019061,WBGENE00020275,WBGENE00022089,WBGENE00022336
GO:BP	purine nucleoside triphosphate biosynthetic process	GO:0009145	1.73e-07	6.76295	26	1441	18	10296	WBGENE00000206,WBGENE00000209,WBGENE00000229,WBGENE00000230,WBGENE00000869,WBGENE00006768,WBGENE00006919,WBGENE00007385,WBGENE00009119,WBGENE00010419,WBGENE00011015,WBGENE00011273,WBGENE00013025,WBGENE00017982,WBGENE00019061,WBGENE00020275,WBGENE00022089,WBGENE00022336
GO:BP	ribonucleoside triphosphate biosynthetic process	GO:0009201	2.31e-07	6.63701	29	1441	19	10296	WBGENE00000206,WBGENE00000209,WBGENE00000229,WBGENE00000230,WBGENE00000869,WBGENE00006768,WBGENE00006919,WBGENE00007089,WBGENE00007385,WBGENE00009119,WBGENE00010419,WBGENE00011015,WBGENE00011273,WBGENE00013025,WBGENE00017982,WBGENE00019061,WBGENE00020275,WBGENE00022089,WBGENE00022336
GO:BP	ribonucleoside triphosphate metabolic process	GO:0009199	2.31e-07	6.63701	29	1441	19	10296	WBGENE00000206,WBGENE00000209,WBGENE00000229,WBGENE00000230,WBGENE00000869,WBGENE00006768,WBGENE00006919,WBGENE00007089,WBGENE00007385,WBGENE00009119,WBGENE00010419,WBGENE00011015,WBGENE00011273,WBGENE00013025,WBGENE00017982,WBGENE00019061,WBGENE00020275,WBGENE00022089,WBGENE00022336
GO:BP	ribonucleotide metabolic process	GO:0009259	2.46e-07	6.60961	136	1441	48	10296	WBGENE00000206,WBGENE00000209,WBGENE00000229,WBGENE00000230,WBGENE00000869,WBGENE00002879,WBGENE00004076,WBGENE00006601,WBGENE00006768,WBGENE00006919,WBGENE00007089,WBGENE00007385,WBGENE00007824,WBGENE00007969,WBGENE00008230,WBGENE00008780,WBGENE00009119,WBGENE00009126,WBGENE00009439,WBGENE00009575,WBGENE00010419,WBGENE00010912,WBGENE00011015,WBGENE00011128,WBGENE00011273,WBGENE00011500,WBGENE000…
GO:BP	ATP biosynthetic process	GO:0006754	3.18e-07	6.49695	24	1441	17	10296	WBGENE00000206,WBGENE00000209,WBGENE00000229,WBGENE00000230,WBGENE00000869,WBGENE00006768,WBGENE00006919,WBGENE00007385,WBGENE00010419,WBGENE00011015,WBGENE00011273,WBGENE00013025,WBGENE00017982,WBGENE00019061,WBGENE00020275,WBGENE00022089,WBGENE00022336
GO:BP	cellular process involved in reproduction in multicellular organism	GO:0022412	3.73e-07	6.42854	112	1441	42	10296	WBGENE00000183,WBGENE00000534,WBGENE00000875,WBGENE00001303,WBGENE00001996,WBGENE00002059,WBGENE00002143,WBGENE00002214,WBGENE00002694,WBGENE00002845,WBGENE00003784,WBGENE00003902,WBGENE00003992,WBGENE00004046,WBGENE00004178,WBGENE00004271,WBGENE00004274,WBGENE00004958,WBGENE00004959,WBGENE00004960,WBGENE00004962,WBGENE00004964,WBGENE00004965,WBGENE00004966,WBGENE00004969,WBGENE00004971,WBGENE000…
GO:BP	protein localization to organelle	GO:0033365	3.93e-07	6.40526	187	1441	59	10296	WBGENE00000097,WBGENE00001047,WBGENE00001303,WBGENE00001662,WBGENE00002072,WBGENE00002074,WBGENE00002219,WBGENE00003793,WBGENE00003806,WBGENE00004101,WBGENE00004109,WBGENE00004888,WBGENE00004953,WBGENE00004955,WBGENE00006565,WBGENE00006733,WBGENE00007270,WBGENE00007278,WBGENE00007683,WBGENE00007686,WBGENE00007696,WBGENE00007927,WBGENE00008053,WBGENE00008164,WBGENE00008857,WBGENE00008919,WBGENE000…
GO:BP	purine ribonucleotide metabolic process	GO:0009150	4.23e-07	6.3734	125	1441	45	10296	WBGENE00000206,WBGENE00000209,WBGENE00000229,WBGENE00000230,WBGENE00000869,WBGENE00002879,WBGENE00004076,WBGENE00006601,WBGENE00006768,WBGENE00006919,WBGENE00007385,WBGENE00007824,WBGENE00007969,WBGENE00008230,WBGENE00008780,WBGENE00009119,WBGENE00009126,WBGENE00009439,WBGENE00010419,WBGENE00010912,WBGENE00011015,WBGENE00011128,WBGENE00011273,WBGENE00011500,WBGENE00011510,WBGENE00011884,WBGENE000…
GO:BP	endoplasmic reticulum to Golgi vesicle-mediated transport	GO:0006888	4.43e-07	6.35341	55	1441	27	10296	WBGENE00002070,WBGENE00003806,WBGENE00004754,WBGENE00004755,WBGENE00004756,WBGENE00006373,WBGENE00006565,WBGENE00009654,WBGENE00009829,WBGENE00010178,WBGENE00010496,WBGENE00010670,WBGENE00010699,WBGENE00010713,WBGENE00011338,WBGENE00011775,WBGENE00011835,WBGENE00013360,WBGENE00013985,WBGENE00015164,WBGENE00017643,WBGENE00019003,WBGENE00021292,WBGENE00022119,WBGENE00022678,WBGENE00043064,WBGENE000…
GO:BP	ubiquitin-dependent ERAD pathway	GO:0030433	5.47e-07	6.26228	30	1441	19	10296	WBGENE00004504,WBGENE00004759,WBGENE00004768,WBGENE00006703,WBGENE00006733,WBGENE00006734,WBGENE00007574,WBGENE00007626,WBGENE00008053,WBGENE00008148,WBGENE00008852,WBGENE00013667,WBGENE00013881,WBGENE00015126,WBGENE00018611,WBGENE00018847,WBGENE00019893,WBGENE00022703,WBGENE00022800
GO:BP	mitochondrial electron transport, NADH to ubiquinone	GO:0006120	9.86e-07	6.00601	20	1441	15	10296	WBGENE00003061,WBGENE00003831,WBGENE00007880,WBGENE00009051,WBGENE00009992,WBGENE00013308,WBGENE00013406,WBGENE00014086,WBGENE00015810,WBGENE00016393,WBGENE00019401,WBGENE00020417,WBGENE00021562,WBGENE00021839,WBGENE00021849
GO:BP	nucleoside triphosphate biosynthetic process	GO:0009142	1.23e-06	5.91108	31	1441	19	10296	WBGENE00000206,WBGENE00000209,WBGENE00000229,WBGENE00000230,WBGENE00000869,WBGENE00006768,WBGENE00006919,WBGENE00007089,WBGENE00007385,WBGENE00009119,WBGENE00010419,WBGENE00011015,WBGENE00011273,WBGENE00013025,WBGENE00017982,WBGENE00019061,WBGENE00020275,WBGENE00022089,WBGENE00022336
GO:BP	nucleoside triphosphate metabolic process	GO:0009141	1.26e-06	5.89985	34	1441	20	10296	WBGENE00000206,WBGENE00000209,WBGENE00000229,WBGENE00000230,WBGENE00000869,WBGENE00006768,WBGENE00006919,WBGENE00007089,WBGENE00007385,WBGENE00009119,WBGENE00010419,WBGENE00011015,WBGENE00011273,WBGENE00013025,WBGENE00017982,WBGENE00019061,WBGENE00020275,WBGENE00022089,WBGENE00022336,WBGENE00022673
GO:BP	cellular component organization	GO:0016043	1.43e-06	5.84359	1578	1441	299	10296	WBGENE00000226,WBGENE00000248,WBGENE00000257,WBGENE00000275,WBGENE00000293,WBGENE00000500,WBGENE00000534,WBGENE00000549,WBGENE00000585,WBGENE00000875,WBGENE00000938,WBGENE00001007,WBGENE00001016,WBGENE00001092,WBGENE00001333,WBGENE00001414,WBGENE00001424,WBGENE00001443,WBGENE00001488,WBGENE00001491,WBGENE00001509,WBGENE00001579,WBGENE00001662,WBGENE00001830,WBGENE00001855,WBGENE00001862,WBGENE000…
GO:BP	ATP synthesis coupled proton transport	GO:0015986	1.63e-06	5.78715	23	1441	16	10296	WBGENE00000206,WBGENE00000209,WBGENE00000229,WBGENE00000230,WBGENE00000869,WBGENE00006768,WBGENE00007385,WBGENE00010419,WBGENE00011015,WBGENE00011273,WBGENE00013025,WBGENE00017982,WBGENE00019061,WBGENE00020275,WBGENE00022089,WBGENE00022336
GO:BP	energy coupled proton transport, down electrochemical gradient	GO:0015985	1.63e-06	5.78715	23	1441	16	10296	WBGENE00000206,WBGENE00000209,WBGENE00000229,WBGENE00000230,WBGENE00000869,WBGENE00006768,WBGENE00007385,WBGENE00010419,WBGENE00011015,WBGENE00011273,WBGENE00013025,WBGENE00017982,WBGENE00019061,WBGENE00020275,WBGENE00022089,WBGENE00022336
GO:BP	organophosphate metabolic process	GO:0019637	2.07e-06	5.68338	381	1441	96	10296	WBGENE00000184,WBGENE00000206,WBGENE00000209,WBGENE00000226,WBGENE00000229,WBGENE00000230,WBGENE00000869,WBGENE00001538,WBGENE00002879,WBGENE00003580,WBGENE00004040,WBGENE00004076,WBGENE00004272,WBGENE00006491,WBGENE00006568,WBGENE00006601,WBGENE00006768,WBGENE00006919,WBGENE00007089,WBGENE00007189,WBGENE00007385,WBGENE00007824,WBGENE00007912,WBGENE00007969,WBGENE00008230,WBGENE00008346,WBGENE000…
GO:BP	multicellular organismal reproductive process	GO:0048609	2.7e-06	5.56905	249	1441	70	10296	WBGENE00000183,WBGENE00000248,WBGENE00000500,WBGENE00000534,WBGENE00000875,WBGENE00001249,WBGENE00001303,WBGENE00001414,WBGENE00001996,WBGENE00002059,WBGENE00002064,WBGENE00002143,WBGENE00002214,WBGENE00002219,WBGENE00002238,WBGENE00002694,WBGENE00002845,WBGENE00003784,WBGENE00003902,WBGENE00003964,WBGENE00003992,WBGENE00004046,WBGENE00004109,WBGENE00004178,WBGENE00004271,WBGENE00004274,WBGENE000…
GO:BP	establishment of protein localization to membrane	GO:0090150	2.71e-06	5.56636	66	1441	29	10296	WBGENE00000184,WBGENE00001047,WBGENE00001303,WBGENE00001662,WBGENE00004964,WBGENE00007637,WBGENE00007683,WBGENE00007696,WBGENE00008164,WBGENE00009012,WBGENE00009521,WBGENE00010097,WBGENE00010323,WBGENE00010892,WBGENE00011017,WBGENE00011488,WBGENE00013311,WBGENE00017799,WBGENE00017825,WBGENE00018009,WBGENE00019893,WBGENE00020066,WBGENE00020193,WBGENE00021420,WBGENE00021427,WBGENE00021644,WBGENE000…
GO:BP	protein targeting	GO:0006605	3.28e-06	5.48399	98	1441	37	10296	WBGENE00000097,WBGENE00001047,WBGENE00001303,WBGENE00001662,WBGENE00004964,WBGENE00007637,WBGENE00007683,WBGENE00007686,WBGENE00007696,WBGENE00007927,WBGENE00008164,WBGENE00008857,WBGENE00009012,WBGENE00009313,WBGENE00009521,WBGENE00009734,WBGENE00010097,WBGENE00010323,WBGENE00010892,WBGENE00011017,WBGENE00011306,WBGENE00011488,WBGENE00011629,WBGENE00011897,WBGENE00012550,WBGENE00013311,WBGENE000…
GO:BP	multicellular organism reproduction	GO:0032504	4.64e-06	5.3333	267	1441	73	10296	WBGENE00000183,WBGENE00000248,WBGENE00000500,WBGENE00000534,WBGENE00000875,WBGENE00001249,WBGENE00001303,WBGENE00001414,WBGENE00001996,WBGENE00002059,WBGENE00002064,WBGENE00002143,WBGENE00002214,WBGENE00002219,WBGENE00002238,WBGENE00002694,WBGENE00002845,WBGENE00003784,WBGENE00003902,WBGENE00003964,WBGENE00003992,WBGENE00004046,WBGENE00004109,WBGENE00004178,WBGENE00004271,WBGENE00004274,WBGENE000…
GO:BP	protein localization to endoplasmic reticulum	GO:0070972	1.06e-05	4.97489	34	1441	19	10296	WBGENE00000097,WBGENE00001047,WBGENE00001303,WBGENE00007683,WBGENE00007696,WBGENE00009012,WBGENE00009521,WBGENE00009783,WBGENE00010097,WBGENE00011306,WBGENE00012550,WBGENE00013311,WBGENE00013985,WBGENE00016195,WBGENE00016395,WBGENE00017799,WBGENE00019893,WBGENE00021420,WBGENE00021427
GO:BP	protein modification by small protein conjugation or removal	GO:0070647	1.14e-05	4.94384	227	1441	64	10296	WBGENE00000500,WBGENE00001112,WBGENE00001511,WBGENE00002344,WBGENE00003917,WBGENE00004320,WBGENE00004759,WBGENE00004768,WBGENE00004808,WBGENE00004888,WBGENE00006699,WBGENE00006702,WBGENE00006703,WBGENE00006704,WBGENE00006707,WBGENE00006713,WBGENE00006715,WBGENE00006719,WBGENE00006720,WBGENE00006724,WBGENE00006727,WBGENE00006728,WBGENE00006730,WBGENE00006734,WBGENE00006736,WBGENE00006856,WBGENE000…
GO:BP	nucleobase-containing small molecule metabolic process	GO:0055086	1.65e-05	4.78269	229	1441	64	10296	WBGENE00000206,WBGENE00000209,WBGENE00000229,WBGENE00000230,WBGENE00000266,WBGENE00000869,WBGENE00001538,WBGENE00002879,WBGENE00003580,WBGENE00004076,WBGENE00004259,WBGENE00005019,WBGENE00006568,WBGENE00006601,WBGENE00006768,WBGENE00006919,WBGENE00007089,WBGENE00007106,WBGENE00007385,WBGENE00007824,WBGENE00007969,WBGENE00008131,WBGENE00008230,WBGENE00008780,WBGENE00009119,WBGENE00009126,WBGENE000…
GO:BP	cellular component organization or biogenesis	GO:0071840	1.77e-05	4.75277	1717	1441	315	10296	WBGENE00000226,WBGENE00000248,WBGENE00000257,WBGENE00000275,WBGENE00000293,WBGENE00000500,WBGENE00000534,WBGENE00000549,WBGENE00000585,WBGENE00000875,WBGENE00000938,WBGENE00001007,WBGENE00001016,WBGENE00001092,WBGENE00001333,WBGENE00001414,WBGENE00001424,WBGENE00001443,WBGENE00001488,WBGENE00001491,WBGENE00001509,WBGENE00001579,WBGENE00001662,WBGENE00001830,WBGENE00001855,WBGENE00001862,WBGENE000…
GO:BP	protein targeting to ER	GO:0045047	2.33e-05	4.63278	26	1441	16	10296	WBGENE00000097,WBGENE00001047,WBGENE00001303,WBGENE00007683,WBGENE00007696,WBGENE00009012,WBGENE00009521,WBGENE00010097,WBGENE00011306,WBGENE00012550,WBGENE00013311,WBGENE00016395,WBGENE00017799,WBGENE00019893,WBGENE00021420,WBGENE00021427
GO:BP	establishment of protein localization to endoplasmic reticulum	GO:0072599	2.33e-05	4.63278	26	1441	16	10296	WBGENE00000097,WBGENE00001047,WBGENE00001303,WBGENE00007683,WBGENE00007696,WBGENE00009012,WBGENE00009521,WBGENE00010097,WBGENE00011306,WBGENE00012550,WBGENE00013311,WBGENE00016395,WBGENE00017799,WBGENE00019893,WBGENE00021420,WBGENE00021427
GO:BP	endomembrane system organization	GO:0010256	2.77e-05	4.55791	118	1441	40	10296	WBGENE00000585,WBGENE00001414,WBGENE00002070,WBGENE00006311,WBGENE00006833,WBGENE00007696,WBGENE00008136,WBGENE00008346,WBGENE00009753,WBGENE00009829,WBGENE00010254,WBGENE00010425,WBGENE00010579,WBGENE00010631,WBGENE00010670,WBGENE00010713,WBGENE00010828,WBGENE00011040,WBGENE00011338,WBGENE00011975,WBGENE00012345,WBGENE00012555,WBGENE00013052,WBGENE00013360,WBGENE00013740,WBGENE00013985,WBGENE000…
GO:BP	reproduction	GO:0000003	3e-05	4.52303	579	1441	128	10296	WBGENE00000183,WBGENE00000226,WBGENE00000248,WBGENE00000389,WBGENE00000500,WBGENE00000517,WBGENE00000534,WBGENE00000875,WBGENE00001249,WBGENE00001303,WBGENE00001413,WBGENE00001414,WBGENE00001830,WBGENE00001862,WBGENE00001996,WBGENE00002059,WBGENE00002064,WBGENE00002143,WBGENE00002201,WBGENE00002214,WBGENE00002219,WBGENE00002238,WBGENE00002694,WBGENE00002717,WBGENE00002845,WBGENE00003499,WBGENE000…
GO:BP	cell cycle process	GO:0022402	3.17e-05	4.49917	294	1441	76	10296	WBGENE00000226,WBGENE00000257,WBGENE00000275,WBGENE00000389,WBGENE00000517,WBGENE00000875,WBGENE00001830,WBGENE00001862,WBGENE00001996,WBGENE00002201,WBGENE00002214,WBGENE00002219,WBGENE00002297,WBGENE00002694,WBGENE00002845,WBGENE00003499,WBGENE00003576,WBGENE00003777,WBGENE00003793,WBGENE00003806,WBGENE00003902,WBGENE00003917,WBGENE00004178,WBGENE00004274,WBGENE00004297,WBGENE00004320,WBGENE000…
GO:BP	primary metabolic process	GO:0044238	3.32e-05	4.47884	5898	1441	919	10296	WBGENE00000041,WBGENE00000097,WBGENE00000099,WBGENE00000102,WBGENE00000155,WBGENE00000184,WBGENE00000198,WBGENE00000206,WBGENE00000209,WBGENE00000226,WBGENE00000229,WBGENE00000230,WBGENE00000254,WBGENE00000259,WBGENE00000266,WBGENE00000269,WBGENE00000275,WBGENE00000376,WBGENE00000389,WBGENE00000405,WBGENE00000407,WBGENE00000410,WBGENE00000467,WBGENE00000500,WBGENE00000507,WBGENE00000508,WBGENE000…
GO:BP	carbohydrate derivative metabolic process	GO:1901135	3.81e-05	4.4191	435	1441	102	10296	WBGENE00000206,WBGENE00000209,WBGENE00000229,WBGENE00000230,WBGENE00000266,WBGENE00000869,WBGENE00001505,WBGENE00001632,WBGENE00001639,WBGENE00001645,WBGENE00002879,WBGENE00004076,WBGENE00005019,WBGENE00005020,WBGENE00005025,WBGENE00006568,WBGENE00006601,WBGENE00006768,WBGENE00006919,WBGENE00007089,WBGENE00007102,WBGENE00007106,WBGENE00007189,WBGENE00007385,WBGENE00007574,WBGENE00007824,WBGENE000…
GO:BP	protein targeting to membrane	GO:0006612	4.25e-05	4.37153	43	1441	21	10296	WBGENE00001047,WBGENE00001303,WBGENE00004964,WBGENE00007637,WBGENE00007683,WBGENE00007696,WBGENE00009012,WBGENE00009521,WBGENE00010097,WBGENE00010323,WBGENE00010892,WBGENE00011488,WBGENE00013311,WBGENE00017799,WBGENE00018009,WBGENE00019893,WBGENE00020066,WBGENE00021420,WBGENE00021427,WBGENE00021952,WBGENE00044542
GO:BP	metabolic process	GO:0008152	4.52e-05	4.34463	6555	1441	1007	10296	WBGENE00000019,WBGENE00000041,WBGENE00000097,WBGENE00000099,WBGENE00000101,WBGENE00000102,WBGENE00000122,WBGENE00000155,WBGENE00000184,WBGENE00000198,WBGENE00000206,WBGENE00000209,WBGENE00000226,WBGENE00000229,WBGENE00000230,WBGENE00000254,WBGENE00000259,WBGENE00000266,WBGENE00000269,WBGENE00000275,WBGENE00000376,WBGENE00000389,WBGENE00000405,WBGENE00000407,WBGENE00000410,WBGENE00000467,WBGENE000…
GO:BP	protein polyubiquitination	GO:0000209	5.3e-05	4.2759	58	1441	25	10296	WBGENE00000500,WBGENE00002344,WBGENE00003917,WBGENE00006702,WBGENE00006703,WBGENE00006704,WBGENE00006707,WBGENE00006713,WBGENE00006715,WBGENE00006719,WBGENE00006720,WBGENE00006730,WBGENE00006734,WBGENE00007009,WBGENE00007643,WBGENE00008433,WBGENE00008871,WBGENE00013270,WBGENE00013538,WBGENE00016156,WBGENE00016158,WBGENE00018847,WBGENE00022069,WBGENE00022358,WBGENE00077696
GO:BP	cell cycle	GO:0007049	5.32e-05	4.27445	372	1441	90	10296	WBGENE00000226,WBGENE00000248,WBGENE00000257,WBGENE00000275,WBGENE00000389,WBGENE00000517,WBGENE00000875,WBGENE00001830,WBGENE00001862,WBGENE00001996,WBGENE00002201,WBGENE00002214,WBGENE00002219,WBGENE00002297,WBGENE00002694,WBGENE00002845,WBGENE00003499,WBGENE00003576,WBGENE00003777,WBGENE00003784,WBGENE00003793,WBGENE00003806,WBGENE00003902,WBGENE00003917,WBGENE00004178,WBGENE00004274,WBGENE000…
GO:BP	ribose phosphate biosynthetic process	GO:0046390	5.53e-05	4.25703	86	1441	32	10296	WBGENE00000206,WBGENE00000209,WBGENE00000229,WBGENE00000230,WBGENE00000869,WBGENE00002879,WBGENE00004076,WBGENE00006768,WBGENE00006919,WBGENE00007089,WBGENE00007385,WBGENE00007824,WBGENE00007969,WBGENE00009119,WBGENE00009439,WBGENE00009575,WBGENE00010419,WBGENE00010912,WBGENE00011015,WBGENE00011128,WBGENE00011273,WBGENE00011500,WBGENE00011510,WBGENE00013025,WBGENE00016415,WBGENE00017982,WBGENE000…
GO:BP	response to endoplasmic reticulum stress	GO:0034976	5.99e-05	4.22259	78	1441	30	10296	WBGENE00002147,WBGENE00003964,WBGENE00004504,WBGENE00004736,WBGENE00004759,WBGENE00004768,WBGENE00005648,WBGENE00006703,WBGENE00006733,WBGENE00006734,WBGENE00006959,WBGENE00007574,WBGENE00007626,WBGENE00008053,WBGENE00008148,WBGENE00008852,WBGENE00009112,WBGENE00009178,WBGENE00013667,WBGENE00013881,WBGENE00014031,WBGENE00014204,WBGENE00015126,WBGENE00015752,WBGENE00018611,WBGENE00018847,WBGENE000…
GO:BP	nucleoside phosphate metabolic process	GO:0006753	6.67e-05	4.17606	192	1441	55	10296	WBGENE00000206,WBGENE00000209,WBGENE00000229,WBGENE00000230,WBGENE00000869,WBGENE00001538,WBGENE00002879,WBGENE00003580,WBGENE00004076,WBGENE00006568,WBGENE00006601,WBGENE00006768,WBGENE00006919,WBGENE00007089,WBGENE00007385,WBGENE00007824,WBGENE00007969,WBGENE00008230,WBGENE00008780,WBGENE00009119,WBGENE00009126,WBGENE00009439,WBGENE00009575,WBGENE00010419,WBGENE00010912,WBGENE00011015,WBGENE000…
GO:BP	small molecule metabolic process	GO:0044281	8.4e-05	4.07593	676	1441	143	10296	WBGENE00000198,WBGENE00000206,WBGENE00000209,WBGENE00000229,WBGENE00000230,WBGENE00000266,WBGENE00000536,WBGENE00000800,WBGENE00000833,WBGENE00000869,WBGENE00001094,WBGENE00001153,WBGENE00001239,WBGENE00001245,WBGENE00001246,WBGENE00001503,WBGENE00001538,WBGENE00001603,WBGENE00001683,WBGENE00001686,WBGENE00001839,WBGENE00002238,WBGENE00002879,WBGENE00003162,WBGENE00003214,WBGENE00003580,WBGENE000…
GO:BP	tricarboxylic acid cycle	GO:0006099	9.71e-05	4.01271	22	1441	14	10296	WBGENE00000041,WBGENE00001503,WBGENE00003162,WBGENE00003225,WBGENE00006433,WBGENE00009440,WBGENE00009664,WBGENE00010317,WBGENE00016392,WBGENE00016844,WBGENE00017759,WBGENE00018491,WBGENE00020679,WBGENE00020950
GO:BP	transmembrane receptor protein tyrosine kinase signaling pathway	GO:0007169	0.000129	3.88851	93	1441	33	10296	WBGENE00002193,WBGENE00002198,WBGENE00002204,WBGENE00002206,WBGENE00002208,WBGENE00004109,WBGENE00004962,WBGENE00009039,WBGENE00009160,WBGENE00010712,WBGENE00011039,WBGENE00012010,WBGENE00012011,WBGENE00012172,WBGENE00012785,WBGENE00013475,WBGENE00013801,WBGENE00013811,WBGENE00015994,WBGENE00016085,WBGENE00016416,WBGENE00016462,WBGENE00016954,WBGENE00017736,WBGENE00018999,WBGENE00019081,WBGENE000…
GO:BP	nuclear division	GO:0000280	0.000146	3.83694	143	1441	44	10296	WBGENE00000226,WBGENE00000257,WBGENE00000275,WBGENE00000875,WBGENE00001830,WBGENE00001862,WBGENE00002201,WBGENE00002214,WBGENE00002219,WBGENE00003499,WBGENE00003576,WBGENE00003793,WBGENE00003806,WBGENE00004178,WBGENE00004297,WBGENE00004320,WBGENE00004737,WBGENE00004888,WBGENE00004952,WBGENE00004953,WBGENE00004960,WBGENE00004985,WBGENE00006376,WBGENE00006381,WBGENE00006540,WBGENE00006974,WBGENE000…
GO:BP	mitotic cell cycle process	GO:1903047	0.000146	3.83438	162	1441	48	10296	WBGENE00000257,WBGENE00000275,WBGENE00000389,WBGENE00000517,WBGENE00000875,WBGENE00001830,WBGENE00002219,WBGENE00002297,WBGENE00002694,WBGENE00002845,WBGENE00003576,WBGENE00003777,WBGENE00003793,WBGENE00003806,WBGENE00003902,WBGENE00003917,WBGENE00004178,WBGENE00004274,WBGENE00004297,WBGENE00004732,WBGENE00004737,WBGENE00004808,WBGENE00004888,WBGENE00004952,WBGENE00004953,WBGENE00006381,WBGENE000…
GO:BP	ribonucleotide biosynthetic process	GO:0009260	0.000151	3.82183	85	1441	31	10296	WBGENE00000206,WBGENE00000209,WBGENE00000229,WBGENE00000230,WBGENE00000869,WBGENE00002879,WBGENE00004076,WBGENE00006768,WBGENE00006919,WBGENE00007089,WBGENE00007385,WBGENE00007824,WBGENE00007969,WBGENE00009119,WBGENE00009439,WBGENE00009575,WBGENE00010419,WBGENE00010912,WBGENE00011015,WBGENE00011128,WBGENE00011273,WBGENE00011500,WBGENE00011510,WBGENE00013025,WBGENE00016415,WBGENE00017982,WBGENE000…
GO:BP	organelle fission	GO:0048285	0.000164	3.78409	153	1441	46	10296	WBGENE00000226,WBGENE00000257,WBGENE00000275,WBGENE00000875,WBGENE00001424,WBGENE00001830,WBGENE00001862,WBGENE00002201,WBGENE00002214,WBGENE00002219,WBGENE00003499,WBGENE00003576,WBGENE00003793,WBGENE00003806,WBGENE00004178,WBGENE00004297,WBGENE00004320,WBGENE00004373,WBGENE00004737,WBGENE00004888,WBGENE00004952,WBGENE00004953,WBGENE00004960,WBGENE00004985,WBGENE00006376,WBGENE00006381,WBGENE000…
GO:BP	purine nucleotide biosynthetic process	GO:0006164	0.000169	3.77333	77	1441	29	10296	WBGENE00000206,WBGENE00000209,WBGENE00000229,WBGENE00000230,WBGENE00000869,WBGENE00002879,WBGENE00004076,WBGENE00006768,WBGENE00006919,WBGENE00007385,WBGENE00007824,WBGENE00007969,WBGENE00009119,WBGENE00009439,WBGENE00010419,WBGENE00010912,WBGENE00011015,WBGENE00011128,WBGENE00011273,WBGENE00011500,WBGENE00011510,WBGENE00013025,WBGENE00016415,WBGENE00017982,WBGENE00019061,WBGENE00020107,WBGENE000…
GO:BP	vesicle budding from membrane	GO:0006900	0.000196	3.7086	20	1441	13	10296	WBGENE00003806,WBGENE00004754,WBGENE00004755,WBGENE00004756,WBGENE00006565,WBGENE00010496,WBGENE00011338,WBGENE00013985,WBGENE00016961,WBGENE00017217,WBGENE00018290,WBGENE00021644,WBGENE00022678
GO:BP	nucleotide metabolic process	GO:0009117	0.000202	3.69363	188	1441	53	10296	WBGENE00000206,WBGENE00000209,WBGENE00000229,WBGENE00000230,WBGENE00000869,WBGENE00001538,WBGENE00002879,WBGENE00004076,WBGENE00006601,WBGENE00006768,WBGENE00006919,WBGENE00007089,WBGENE00007385,WBGENE00007824,WBGENE00007969,WBGENE00008230,WBGENE00008780,WBGENE00009119,WBGENE00009126,WBGENE00009439,WBGENE00009575,WBGENE00010419,WBGENE00010912,WBGENE00011015,WBGENE00011128,WBGENE00011271,WBGENE000…
GO:BP	establishment of protein localization to organelle	GO:0072594	0.000216	3.66494	117	1441	38	10296	WBGENE00000097,WBGENE00001047,WBGENE00001303,WBGENE00001662,WBGENE00002072,WBGENE00002074,WBGENE00003793,WBGENE00003806,WBGENE00004109,WBGENE00007683,WBGENE00007686,WBGENE00007696,WBGENE00007927,WBGENE00008164,WBGENE00008857,WBGENE00008919,WBGENE00009012,WBGENE00009313,WBGENE00009521,WBGENE00009734,WBGENE00009956,WBGENE00010097,WBGENE00011017,WBGENE00011306,WBGENE00011629,WBGENE00011897,WBGENE000…
GO:BP	mitotic cell cycle	GO:0000278	0.000244	3.61246	209	1441	57	10296	WBGENE00000248,WBGENE00000257,WBGENE00000275,WBGENE00000389,WBGENE00000517,WBGENE00000875,WBGENE00001830,WBGENE00002219,WBGENE00002297,WBGENE00002694,WBGENE00002845,WBGENE00003576,WBGENE00003777,WBGENE00003793,WBGENE00003806,WBGENE00003902,WBGENE00003917,WBGENE00004178,WBGENE00004274,WBGENE00004297,WBGENE00004732,WBGENE00004737,WBGENE00004808,WBGENE00004888,WBGENE00004952,WBGENE00004953,WBGENE000…
GO:BP	germ cell development	GO:0007281	0.000253	3.59755	91	1441	32	10296	WBGENE00000183,WBGENE00000534,WBGENE00001303,WBGENE00001996,WBGENE00002059,WBGENE00002694,WBGENE00002845,WBGENE00003784,WBGENE00003902,WBGENE00003992,WBGENE00004046,WBGENE00004178,WBGENE00004271,WBGENE00004274,WBGENE00004958,WBGENE00004962,WBGENE00004964,WBGENE00004965,WBGENE00004966,WBGENE00004969,WBGENE00004971,WBGENE00004974,WBGENE00004975,WBGENE00006697,WBGENE00006699,WBGENE00006888,WBGENE000…
GO:BP	reproductive process	GO:0022414	0.000265	3.57624	531	1441	116	10296	WBGENE00000183,WBGENE00000226,WBGENE00000248,WBGENE00000389,WBGENE00000500,WBGENE00000517,WBGENE00000534,WBGENE00000875,WBGENE00001249,WBGENE00001303,WBGENE00001413,WBGENE00001414,WBGENE00001830,WBGENE00001862,WBGENE00001996,WBGENE00002059,WBGENE00002064,WBGENE00002143,WBGENE00002201,WBGENE00002214,WBGENE00002219,WBGENE00002238,WBGENE00002694,WBGENE00002717,WBGENE00002845,WBGENE00003499,WBGENE000…
GO:BP	protein localization to membrane	GO:0072657	0.000317	3.4993	105	1441	35	10296	WBGENE00000184,WBGENE00001047,WBGENE00001303,WBGENE00001333,WBGENE00001662,WBGENE00004272,WBGENE00004373,WBGENE00004964,WBGENE00007270,WBGENE00007637,WBGENE00007683,WBGENE00007696,WBGENE00008164,WBGENE00009012,WBGENE00009521,WBGENE00010097,WBGENE00010323,WBGENE00010892,WBGENE00011017,WBGENE00011488,WBGENE00013311,WBGENE00014119,WBGENE00017799,WBGENE00017825,WBGENE00018009,WBGENE00019893,WBGENE000…
GO:BP	purine ribonucleotide biosynthetic process	GO:0009152	0.000338	3.4712	75	1441	28	10296	WBGENE00000206,WBGENE00000209,WBGENE00000229,WBGENE00000230,WBGENE00000869,WBGENE00002879,WBGENE00004076,WBGENE00006768,WBGENE00006919,WBGENE00007385,WBGENE00007824,WBGENE00007969,WBGENE00009119,WBGENE00009439,WBGENE00010419,WBGENE00010912,WBGENE00011015,WBGENE00011128,WBGENE00011273,WBGENE00011500,WBGENE00011510,WBGENE00013025,WBGENE00016415,WBGENE00017982,WBGENE00019061,WBGENE00020275,WBGENE000…
GO:BP	mitochondrial transmembrane transport	GO:1990542	0.000361	3.44192	59	1441	24	10296	WBGENE00000230,WBGENE00000869,WBGENE00006439,WBGENE00007080,WBGENE00007686,WBGENE00007927,WBGENE00008137,WBGENE00008505,WBGENE00008857,WBGENE00009313,WBGENE00009513,WBGENE00009734,WBGENE00010485,WBGENE00011273,WBGENE00011493,WBGENE00011662,WBGENE00011897,WBGENE00012402,WBGENE00013462,WBGENE00016358,WBGENE00017982,WBGENE00018765,WBGENE00020140,WBGENE00020383
GO:BP	purine-containing compound biosynthetic process	GO:0072522	0.000435	3.36188	80	1441	29	10296	WBGENE00000206,WBGENE00000209,WBGENE00000229,WBGENE00000230,WBGENE00000869,WBGENE00002879,WBGENE00004076,WBGENE00006768,WBGENE00006919,WBGENE00007385,WBGENE00007824,WBGENE00007969,WBGENE00009119,WBGENE00009439,WBGENE00010419,WBGENE00010912,WBGENE00011015,WBGENE00011128,WBGENE00011273,WBGENE00011500,WBGENE00011510,WBGENE00013025,WBGENE00016415,WBGENE00017982,WBGENE00019061,WBGENE00020107,WBGENE000…
GO:BP	proteolysis	GO:0006508	0.000571	3.24305	709	1441	145	10296	WBGENE00000097,WBGENE00000155,WBGENE00000254,WBGENE00000500,WBGENE00000534,WBGENE00000543,WBGENE00000836,WBGENE00000837,WBGENE00000838,WBGENE00001056,WBGENE00001112,WBGENE00001405,WBGENE00002249,WBGENE00002250,WBGENE00002344,WBGENE00003914,WBGENE00003917,WBGENE00003922,WBGENE00003925,WBGENE00003926,WBGENE00003927,WBGENE00003928,WBGENE00003947,WBGENE00003948,WBGENE00003951,WBGENE00003952,WBGENE000…
GO:BP	COPII-coated vesicle budding	GO:0090114	0.000745	3.12812	11	1441	9	10296	WBGENE00003806,WBGENE00004754,WBGENE00004755,WBGENE00004756,WBGENE00006565,WBGENE00010496,WBGENE00011338,WBGENE00013985,WBGENE00022678
GO:BP	spermatid differentiation	GO:0048515	0.000758	3.12041	16	1441	11	10296	WBGENE00002059,WBGENE00004958,WBGENE00004960,WBGENE00004962,WBGENE00004964,WBGENE00004966,WBGENE00004969,WBGENE00004971,WBGENE00004974,WBGENE00004975,WBGENE00013747
GO:BP	lipid localization	GO:0010876	0.001103	2.9573	110	1441	35	10296	WBGENE00000019,WBGENE00000020,WBGENE00000023,WBGENE00001153,WBGENE00002263,WBGENE00003061,WBGENE00003065,WBGENE00006452,WBGENE00007144,WBGENE00008274,WBGENE00008670,WBGENE00008832,WBGENE00008856,WBGENE00009218,WBGENE00009404,WBGENE00009498,WBGENE00009753,WBGENE00010425,WBGENE00011040,WBGENE00011827,WBGENE00012360,WBGENE00012930,WBGENE00013034,WBGENE00013052,WBGENE00015009,WBGENE00016288,WBGENE000…
GO:BP	mitotic nuclear division	GO:0140014	0.001252	2.9023	75	1441	27	10296	WBGENE00000257,WBGENE00000275,WBGENE00000875,WBGENE00001830,WBGENE00003576,WBGENE00003793,WBGENE00003806,WBGENE00004178,WBGENE00004737,WBGENE00004888,WBGENE00004952,WBGENE00004953,WBGENE00006381,WBGENE00006540,WBGENE00006974,WBGENE00009254,WBGENE00010093,WBGENE00010425,WBGENE00010785,WBGENE00012121,WBGENE00012191,WBGENE00015515,WBGENE00017641,WBGENE00017643,WBGENE00019940,WBGENE00020392,WBGENE000…
GO:BP	organophosphate ester transport	GO:0015748	0.001297	2.88714	43	1441	19	10296	WBGENE00006439,WBGENE00007144,WBGENE00008856,WBGENE00009498,WBGENE00009753,WBGENE00010459,WBGENE00010485,WBGENE00011662,WBGENE00011827,WBGENE00012033,WBGENE00012360,WBGENE00013034,WBGENE00013052,WBGENE00018827,WBGENE00019530,WBGENE00019531,WBGENE00020140,WBGENE00021854,WBGENE00022155
GO:BP	cytoplasmic translation	GO:0002181	0.001425	2.84604	47	1441	20	10296	WBGENE00004408,WBGENE00004409,WBGENE00004410,WBGENE00004420,WBGENE00004445,WBGENE00004447,WBGENE00004492,WBGENE00004497,WBGENE00007111,WBGENE00009880,WBGENE00010405,WBGENE00010560,WBGENE00012126,WBGENE00015920,WBGENE00016113,WBGENE00016493,WBGENE00016496,WBGENE00019537,WBGENE00021466,WBGENE00303000
GO:BP	spindle organization	GO:0007051	0.001425	2.84604	47	1441	20	10296	WBGENE00000257,WBGENE00000875,WBGENE00001830,WBGENE00002219,WBGENE00002845,WBGENE00003902,WBGENE00004952,WBGENE00004953,WBGENE00006381,WBGENE00006537,WBGENE00006540,WBGENE00006974,WBGENE00006994,WBGENE00008053,WBGENE00012156,WBGENE00012191,WBGENE00015515,WBGENE00019940,WBGENE00020392,WBGENE00021470
GO:BP	spermatid development	GO:0007286	0.001437	2.84268	14	1441	10	10296	WBGENE00002059,WBGENE00004958,WBGENE00004962,WBGENE00004964,WBGENE00004966,WBGENE00004969,WBGENE00004971,WBGENE00004974,WBGENE00004975,WBGENE00013747
GO:BP	cellular homeostasis	GO:0019725	0.001605	2.79446	140	1441	41	10296	WBGENE00003153,WBGENE00003735,WBGENE00004063,WBGENE00004736,WBGENE00004888,WBGENE00004959,WBGENE00004976,WBGENE00006487,WBGENE00006504,WBGENE00006601,WBGENE00006768,WBGENE00006833,WBGENE00006911,WBGENE00006918,WBGENE00007248,WBGENE00007333,WBGENE00008074,WBGENE00008274,WBGENE00008780,WBGENE00009045,WBGENE00009238,WBGENE00009920,WBGENE00010130,WBGENE00010778,WBGENE00010794,WBGENE00011110,WBGENE000…
GO:BP	chromosome organization	GO:0051276	0.002061	2.68603	259	1441	64	10296	WBGENE00000257,WBGENE00000275,WBGENE00000875,WBGENE00000938,WBGENE00001016,WBGENE00001092,WBGENE00001830,WBGENE00001855,WBGENE00001862,WBGENE00001973,WBGENE00002717,WBGENE00003367,WBGENE00003576,WBGENE00003806,WBGENE00004204,WBGENE00004297,WBGENE00004320,WBGENE00004323,WBGENE00004510,WBGENE00004737,WBGENE00004782,WBGENE00004888,WBGENE00004952,WBGENE00005007,WBGENE00005013,WBGENE00006376,WBGENE000…
GO:BP	homeostatic process	GO:0042592	0.002088	2.68027	181	1441	49	10296	WBGENE00003153,WBGENE00003735,WBGENE00004063,WBGENE00004076,WBGENE00004736,WBGENE00004888,WBGENE00004959,WBGENE00004976,WBGENE00006487,WBGENE00006504,WBGENE00006601,WBGENE00006768,WBGENE00006833,WBGENE00006911,WBGENE00006918,WBGENE00007248,WBGENE00007333,WBGENE00008074,WBGENE00008274,WBGENE00008410,WBGENE00008780,WBGENE00009045,WBGENE00009218,WBGENE00009238,WBGENE00009920,WBGENE00010130,WBGENE000…
GO:BP	nitrogen compound metabolic process	GO:0006807	0.002515	2.59955	5495	1441	849	10296	WBGENE00000097,WBGENE00000099,WBGENE00000102,WBGENE00000155,WBGENE00000206,WBGENE00000209,WBGENE00000226,WBGENE00000229,WBGENE00000230,WBGENE00000254,WBGENE00000259,WBGENE00000266,WBGENE00000275,WBGENE00000376,WBGENE00000389,WBGENE00000405,WBGENE00000407,WBGENE00000410,WBGENE00000467,WBGENE00000500,WBGENE00000507,WBGENE00000508,WBGENE00000517,WBGENE00000534,WBGENE00000543,WBGENE00000548,WBGENE000…
GO:BP	protein ubiquitination	GO:0016567	0.002515	2.59951	157	1441	44	10296	WBGENE00000500,WBGENE00001511,WBGENE00002344,WBGENE00003917,WBGENE00004320,WBGENE00004759,WBGENE00004768,WBGENE00004808,WBGENE00006699,WBGENE00006702,WBGENE00006703,WBGENE00006704,WBGENE00006707,WBGENE00006713,WBGENE00006715,WBGENE00006719,WBGENE00006720,WBGENE00006727,WBGENE00006728,WBGENE00006730,WBGENE00006734,WBGENE00007009,WBGENE00007574,WBGENE00007626,WBGENE00007643,WBGENE00008330,WBGENE000…
GO:BP	translational initiation	GO:0006413	0.002988	2.52465	45	1441	19	10296	WBGENE00001225,WBGENE00001229,WBGENE00001233,WBGENE00002059,WBGENE00002061,WBGENE00002064,WBGENE00002066,WBGENE00007111,WBGENE00008480,WBGENE00008670,WBGENE00010560,WBGENE00015920,WBGENE00016113,WBGENE00016496,WBGENE00018391,WBGENE00019162,WBGENE00021351,WBGENE00021466,WBGENE00303000
GO:BP	pyruvate metabolic process	GO:0006090	0.003639	2.439	24	1441	13	10296	WBGENE00006601,WBGENE00007824,WBGENE00008230,WBGENE00008780,WBGENE00009082,WBGENE00009126,WBGENE00011232,WBGENE00011510,WBGENE00011884,WBGENE00012983,WBGENE00017166,WBGENE00019151,WBGENE00020185
GO:BP	spindle elongation	GO:0051231	0.004388	2.3577	10	1441	8	10296	WBGENE00000257,WBGENE00000875,WBGENE00004952,WBGENE00006381,WBGENE00006974,WBGENE00006994,WBGENE00015515,WBGENE00020392
GO:BP	protein modification by small protein conjugation	GO:0032446	0.005003	2.30076	176	1441	47	10296	WBGENE00000500,WBGENE00001511,WBGENE00002344,WBGENE00003917,WBGENE00004320,WBGENE00004759,WBGENE00004768,WBGENE00004808,WBGENE00004888,WBGENE00006699,WBGENE00006702,WBGENE00006703,WBGENE00006704,WBGENE00006707,WBGENE00006713,WBGENE00006715,WBGENE00006719,WBGENE00006720,WBGENE00006727,WBGENE00006728,WBGENE00006730,WBGENE00006734,WBGENE00007009,WBGENE00007574,WBGENE00007626,WBGENE00007643,WBGENE000…
GO:BP	cell division	GO:0051301	0.005325	2.27367	117	1441	35	10296	WBGENE00000389,WBGENE00000517,WBGENE00000875,WBGENE00002214,WBGENE00002219,WBGENE00002297,WBGENE00002694,WBGENE00003777,WBGENE00003806,WBGENE00003902,WBGENE00003917,WBGENE00003992,WBGENE00004178,WBGENE00004274,WBGENE00004320,WBGENE00004357,WBGENE00004737,WBGENE00004959,WBGENE00006381,WBGENE00006528,WBGENE00006540,WBGENE00006795,WBGENE00006974,WBGENE00006994,WBGENE00007270,WBGENE00010730,WBGENE000…
GO:BP	posttranslational protein targeting to endoplasmic reticulum membrane	GO:0006620	0.006534	2.18483	6	1441	6	10296	WBGENE00001047,WBGENE00001303,WBGENE00007683,WBGENE00013311,WBGENE00019893,WBGENE00021427
GO:BP	nucleoside diphosphate metabolic process	GO:0009132	0.006612	2.17967	25	1441	13	10296	WBGENE00002879,WBGENE00003580,WBGENE00006601,WBGENE00008230,WBGENE00008780,WBGENE00009119,WBGENE00009126,WBGENE00009575,WBGENE00011510,WBGENE00011884,WBGENE00017166,WBGENE00020185,WBGENE00020190
GO:BP	localization within membrane	GO:0051668	0.007038	2.15252	128	1441	37	10296	WBGENE00000184,WBGENE00001047,WBGENE00001303,WBGENE00001333,WBGENE00001662,WBGENE00004272,WBGENE00004373,WBGENE00004964,WBGENE00007270,WBGENE00007637,WBGENE00007683,WBGENE00007696,WBGENE00008164,WBGENE00009012,WBGENE00009521,WBGENE00010097,WBGENE00010323,WBGENE00010631,WBGENE00010892,WBGENE00011017,WBGENE00011488,WBGENE00013311,WBGENE00014119,WBGENE00017799,WBGENE00017825,WBGENE00018009,WBGENE000…
GO:BP	chromosome segregation	GO:0007059	0.007038	2.15252	128	1441	37	10296	WBGENE00000226,WBGENE00000257,WBGENE00000275,WBGENE00000875,WBGENE00001830,WBGENE00001862,WBGENE00002227,WBGENE00003499,WBGENE00003576,WBGENE00003806,WBGENE00004320,WBGENE00004737,WBGENE00004888,WBGENE00004952,WBGENE00004960,WBGENE00006376,WBGENE00006381,WBGENE00006540,WBGENE00006579,WBGENE00006595,WBGENE00006974,WBGENE00006994,WBGENE00007278,WBGENE00007733,WBGENE00009254,WBGENE00010093,WBGENE000…
GO:BP	regulation of mRNA metabolic process	GO:1903311	0.007078	2.15008	68	1441	24	10296	WBGENE00000376,WBGENE00002845,WBGENE00004424,WBGENE00004698,WBGENE00004701,WBGENE00004705,WBGENE00004980,WBGENE00006499,WBGENE00006697,WBGENE00010046,WBGENE00012245,WBGENE00013325,WBGENE00013808,WBGENE00014015,WBGENE00015557,WBGENE00015943,WBGENE00017816,WBGENE00017951,WBGENE00018154,WBGENE00018391,WBGENE00019509,WBGENE00022101,WBGENE00044674,WBGENE00045383
GO:BP	cytokinetic process	GO:0032506	0.007413	2.13001	13	1441	9	10296	WBGENE00000875,WBGENE00002219,WBGENE00002297,WBGENE00003806,WBGENE00003902,WBGENE00004274,WBGENE00004357,WBGENE00006540,WBGENE00006974
GO:BP	carboxylic acid metabolic process	GO:0019752	0.007986	2.09767	358	1441	80	10296	WBGENE00000198,WBGENE00000800,WBGENE00000833,WBGENE00001094,WBGENE00001153,WBGENE00001239,WBGENE00001245,WBGENE00001246,WBGENE00001503,WBGENE00001603,WBGENE00001839,WBGENE00002238,WBGENE00003162,WBGENE00003214,WBGENE00003815,WBGENE00004076,WBGENE00004189,WBGENE00004259,WBGENE00006409,WBGENE00006518,WBGENE00006601,WBGENE00007363,WBGENE00007756,WBGENE00007824,WBGENE00007969,WBGENE00008230,WBGENE000…
GO:BP	protein transmembrane transport	GO:0071806	0.008004	2.09671	36	1441	16	10296	WBGENE00001047,WBGENE00001303,WBGENE00007683,WBGENE00007686,WBGENE00007696,WBGENE00007927,WBGENE00008164,WBGENE00008857,WBGENE00009012,WBGENE00009313,WBGENE00009734,WBGENE00011897,WBGENE00013311,WBGENE00019305,WBGENE00020383,WBGENE00021427
GO:BP	sister chromatid segregation	GO:0000819	0.008498	2.0707	73	1441	25	10296	WBGENE00000257,WBGENE00000275,WBGENE00000875,WBGENE00001830,WBGENE00001862,WBGENE00003576,WBGENE00003806,WBGENE00004320,WBGENE00004737,WBGENE00004888,WBGENE00004952,WBGENE00006381,WBGENE00006540,WBGENE00006974,WBGENE00007278,WBGENE00009254,WBGENE00010093,WBGENE00010425,WBGENE00010785,WBGENE00012121,WBGENE00012191,WBGENE00015515,WBGENE00017641,WBGENE00017643,WBGENE00020392
GO:BP	oxoacid metabolic process	GO:0043436	0.008905	2.05034	359	1441	80	10296	WBGENE00000198,WBGENE00000800,WBGENE00000833,WBGENE00001094,WBGENE00001153,WBGENE00001239,WBGENE00001245,WBGENE00001246,WBGENE00001503,WBGENE00001603,WBGENE00001839,WBGENE00002238,WBGENE00003162,WBGENE00003214,WBGENE00003815,WBGENE00004076,WBGENE00004189,WBGENE00004259,WBGENE00006409,WBGENE00006518,WBGENE00006601,WBGENE00007363,WBGENE00007756,WBGENE00007824,WBGENE00007969,WBGENE00008230,WBGENE000…
GO:BP	positive regulation of protein metabolic process	GO:0051247	0.009891	2.00475	120	1441	35	10296	WBGENE00000500,WBGENE00001511,WBGENE00002064,WBGENE00002162,WBGENE00002238,WBGENE00002583,WBGENE00004409,WBGENE00004506,WBGENE00006577,WBGENE00006579,WBGENE00006713,WBGENE00006734,WBGENE00007009,WBGENE00007428,WBGENE00007791,WBGENE00007969,WBGENE00008871,WBGENE00009650,WBGENE00011828,WBGENE00012115,WBGENE00013538,WBGENE00015326,WBGENE00015688,WBGENE00016156,WBGENE00016158,WBGENE00017733,WBGENE000…
GO:BP	vesicle organization	GO:0016050	0.011243	1.94913	83	1441	27	10296	WBGENE00003806,WBGENE00004271,WBGENE00004272,WBGENE00004754,WBGENE00004755,WBGENE00004756,WBGENE00004899,WBGENE00006373,WBGENE00006565,WBGENE00006833,WBGENE00008346,WBGENE00009478,WBGENE00010496,WBGENE00010713,WBGENE00011338,WBGENE00011972,WBGENE00012644,WBGENE00013985,WBGENE00016961,WBGENE00017217,WBGENE00018290,WBGENE00019305,WBGENE00019757,WBGENE00021644,WBGENE00022678,WBGENE00043064,WBGENE000…
GO:BP	nuclear chromosome segregation	GO:0098813	0.01125	1.94886	111	1441	33	10296	WBGENE00000226,WBGENE00000257,WBGENE00000275,WBGENE00000875,WBGENE00001830,WBGENE00001862,WBGENE00003499,WBGENE00003576,WBGENE00003806,WBGENE00004320,WBGENE00004737,WBGENE00004888,WBGENE00004952,WBGENE00004960,WBGENE00006376,WBGENE00006381,WBGENE00006540,WBGENE00006974,WBGENE00006994,WBGENE00007278,WBGENE00007733,WBGENE00009254,WBGENE00010093,WBGENE00010425,WBGENE00010785,WBGENE00012121,WBGENE000…
GO:BP	mitotic sister chromatid segregation	GO:0000070	0.011274	1.94793	61	1441	22	10296	WBGENE00000257,WBGENE00000275,WBGENE00000875,WBGENE00001830,WBGENE00003576,WBGENE00003806,WBGENE00004737,WBGENE00004888,WBGENE00004952,WBGENE00006381,WBGENE00006540,WBGENE00006974,WBGENE00009254,WBGENE00010093,WBGENE00010425,WBGENE00010785,WBGENE00012121,WBGENE00012191,WBGENE00015515,WBGENE00017641,WBGENE00017643,WBGENE00020392
GO:BP	regulation of catabolic process	GO:0009894	0.014323	1.84398	117	1441	34	10296	WBGENE00000376,WBGENE00000500,WBGENE00002583,WBGENE00002845,WBGENE00004458,WBGENE00004460,WBGENE00004506,WBGENE00004879,WBGENE00006414,WBGENE00006499,WBGENE00006724,WBGENE00006734,WBGENE00007009,WBGENE00007791,WBGENE00007969,WBGENE00008871,WBGENE00011071,WBGENE00012732,WBGENE00013538,WBGENE00014015,WBGENE00015326,WBGENE00015688,WBGENE00015943,WBGENE00016156,WBGENE00016158,WBGENE00017733,WBGENE000…
GO:BP	regulation of membrane lipid distribution	GO:0097035	0.014324	1.84395	23	1441	12	10296	WBGENE00009498,WBGENE00009753,WBGENE00010828,WBGENE00011040,WBGENE00011827,WBGENE00012360,WBGENE00013034,WBGENE00013052,WBGENE00018318,WBGENE00019530,WBGENE00019531,WBGENE00021691
GO:BP	lipid transport	GO:0006869	0.01439	1.84195	84	1441	27	10296	WBGENE00000019,WBGENE00000020,WBGENE00000023,WBGENE00002263,WBGENE00006452,WBGENE00007144,WBGENE00008274,WBGENE00008832,WBGENE00008856,WBGENE00009218,WBGENE00009404,WBGENE00009498,WBGENE00009753,WBGENE00011040,WBGENE00011827,WBGENE00012360,WBGENE00012930,WBGENE00013034,WBGENE00013052,WBGENE00016288,WBGENE00016331,WBGENE00018632,WBGENE00019530,WBGENE00019531,WBGENE00021854,WBGENE00022155,WBGENE000…
GO:BP	microtubule cytoskeleton organization involved in mitosis	GO:1902850	0.01649	1.78279	58	1441	21	10296	WBGENE00000257,WBGENE00000875,WBGENE00002845,WBGENE00003902,WBGENE00003917,WBGENE00004732,WBGENE00004808,WBGENE00004952,WBGENE00004953,WBGENE00006381,WBGENE00006528,WBGENE00006540,WBGENE00006974,WBGENE00006994,WBGENE00008053,WBGENE00008166,WBGENE00012191,WBGENE00015515,WBGENE00019940,WBGENE00020392,WBGENE00021470
GO:BP	cytokinesis	GO:0000910	0.01702	1.76904	34	1441	15	10296	WBGENE00000875,WBGENE00002214,WBGENE00002219,WBGENE00002297,WBGENE00002694,WBGENE00003777,WBGENE00003806,WBGENE00003902,WBGENE00004274,WBGENE00004357,WBGENE00006528,WBGENE00006540,WBGENE00006795,WBGENE00006974,WBGENE00018869
GO:BP	Golgi organization	GO:0007030	0.018475	1.73341	38	1441	16	10296	WBGENE00000585,WBGENE00002070,WBGENE00008136,WBGENE00008346,WBGENE00009829,WBGENE00010631,WBGENE00010670,WBGENE00010713,WBGENE00011975,WBGENE00013360,WBGENE00013985,WBGENE00018017,WBGENE00019003,WBGENE00021536,WBGENE00021644,WBGENE00043064
GO:BP	chemical homeostasis	GO:0048878	0.021007	1.67763	154	1441	41	10296	WBGENE00003153,WBGENE00003735,WBGENE00004063,WBGENE00004076,WBGENE00004736,WBGENE00004959,WBGENE00004976,WBGENE00006487,WBGENE00006504,WBGENE00006768,WBGENE00006833,WBGENE00006911,WBGENE00006918,WBGENE00007248,WBGENE00008074,WBGENE00008274,WBGENE00008410,WBGENE00008780,WBGENE00009045,WBGENE00009218,WBGENE00009920,WBGENE00010130,WBGENE00010828,WBGENE00011232,WBGENE00012543,WBGENE00012712,WBGENE000…
GO:BP	mitotic spindle organization	GO:0007052	0.023348	1.63175	31	1441	14	10296	WBGENE00000257,WBGENE00000875,WBGENE00004952,WBGENE00004953,WBGENE00006381,WBGENE00006540,WBGENE00006974,WBGENE00006994,WBGENE00008053,WBGENE00012191,WBGENE00015515,WBGENE00019940,WBGENE00020392,WBGENE00021470
GO:BP	regulation of protein catabolic process	GO:0042176	0.024122	1.61759	55	1441	20	10296	WBGENE00000500,WBGENE00004458,WBGENE00004460,WBGENE00004506,WBGENE00006724,WBGENE00006734,WBGENE00007009,WBGENE00007791,WBGENE00007969,WBGENE00008871,WBGENE00011071,WBGENE00013538,WBGENE00015326,WBGENE00015688,WBGENE00016156,WBGENE00016158,WBGENE00017733,WBGENE00018586,WBGENE00022069,WBGENE00022358
GO:BP	cellular response to stress	GO:0033554	0.024125	1.61754	380	1441	82	10296	WBGENE00000097,WBGENE00000500,WBGENE00000938,WBGENE00001973,WBGENE00002002,WBGENE00002147,WBGENE00003964,WBGENE00004053,WBGENE00004297,WBGENE00004320,WBGENE00004504,WBGENE00004736,WBGENE00004737,WBGENE00004759,WBGENE00004768,WBGENE00004807,WBGENE00004930,WBGENE00004931,WBGENE00004985,WBGENE00005648,WBGENE00006059,WBGENE00006414,WBGENE00006699,WBGENE00006703,WBGENE00006707,WBGENE00006730,WBGENE000…
GO:BP	N-glycan processing	GO:0006491	0.025298	1.59692	9	1441	7	10296	WBGENE00008258,WBGENE00008411,WBGENE00009583,WBGENE00010284,WBGENE00013881,WBGENE00014249,WBGENE00018594
GO:BP	mitotic spindle elongation	GO:0000022	0.025298	1.59692	9	1441	7	10296	WBGENE00000257,WBGENE00000875,WBGENE00004952,WBGENE00006381,WBGENE00006974,WBGENE00015515,WBGENE00020392
GO:BP	intracellular protein transmembrane transport	GO:0065002	0.025955	1.58578	35	1441	15	10296	WBGENE00001047,WBGENE00001303,WBGENE00007683,WBGENE00007686,WBGENE00007696,WBGENE00007927,WBGENE00008857,WBGENE00009012,WBGENE00009313,WBGENE00009734,WBGENE00011897,WBGENE00013311,WBGENE00019305,WBGENE00020383,WBGENE00021427
GO:BP	response to organonitrogen compound	GO:0010243	0.026842	1.57119	82	1441	26	10296	WBGENE00004272,WBGENE00004504,WBGENE00004759,WBGENE00004768,WBGENE00006414,WBGENE00006703,WBGENE00006733,WBGENE00006734,WBGENE00007390,WBGENE00007574,WBGENE00007626,WBGENE00008053,WBGENE00008148,WBGENE00008852,WBGENE00009178,WBGENE00010425,WBGENE00013667,WBGENE00013881,WBGENE00014031,WBGENE00014204,WBGENE00015126,WBGENE00018611,WBGENE00018847,WBGENE00019893,WBGENE00022703,WBGENE00022800
GO:BP	response to nitrogen compound	GO:1901698	0.029209	1.53449	87	1441	27	10296	WBGENE00004272,WBGENE00004504,WBGENE00004759,WBGENE00004768,WBGENE00006414,WBGENE00006703,WBGENE00006733,WBGENE00006734,WBGENE00007390,WBGENE00007574,WBGENE00007626,WBGENE00008053,WBGENE00008148,WBGENE00008852,WBGENE00009178,WBGENE00010280,WBGENE00010425,WBGENE00013667,WBGENE00013881,WBGENE00014031,WBGENE00014204,WBGENE00015126,WBGENE00018611,WBGENE00018847,WBGENE00019893,WBGENE00022703,WBGENE000…
GO:BP	ribonucleoside diphosphate metabolic process	GO:0009185	0.031109	1.50711	21	1441	11	10296	WBGENE00002879,WBGENE00006601,WBGENE00008230,WBGENE00008780,WBGENE00009126,WBGENE00009575,WBGENE00011510,WBGENE00011884,WBGENE00017166,WBGENE00020185,WBGENE00020190
GO:BP	endoplasmic reticulum organization	GO:0007029	0.0316	1.50032	28	1441	13	10296	WBGENE00002070,WBGENE00007696,WBGENE00010254,WBGENE00010425,WBGENE00010579,WBGENE00011338,WBGENE00012345,WBGENE00012555,WBGENE00013740,WBGENE00017825,WBGENE00019693,WBGENE00021428,WBGENE00021868
GO:BP	organic substance metabolic process	GO:0071704	0.036762	1.43461	6298	1441	949	10296	WBGENE00000019,WBGENE00000097,WBGENE00000099,WBGENE00000102,WBGENE00000122,WBGENE00000155,WBGENE00000184,WBGENE00000198,WBGENE00000206,WBGENE00000209,WBGENE00000226,WBGENE00000229,WBGENE00000230,WBGENE00000254,WBGENE00000259,WBGENE00000266,WBGENE00000269,WBGENE00000275,WBGENE00000376,WBGENE00000389,WBGENE00000405,WBGENE00000407,WBGENE00000410,WBGENE00000467,WBGENE00000472,WBGENE00000475,WBGENE000…
GO:BP	regulation of cell cycle	GO:0051726	0.041206	1.38504	153	1441	40	10296	WBGENE00000257,WBGENE00000275,WBGENE00000389,WBGENE00000517,WBGENE00001862,WBGENE00002201,WBGENE00002219,WBGENE00002297,WBGENE00003784,WBGENE00003793,WBGENE00003806,WBGENE00003902,WBGENE00004178,WBGENE00004320,WBGENE00004767,WBGENE00004807,WBGENE00004808,WBGENE00004955,WBGENE00006311,WBGENE00006376,WBGENE00006385,WBGENE00006528,WBGENE00006540,WBGENE00006974,WBGENE00007028,WBGENE00009650,WBGENE000…
GO:BP	posttranslational protein targeting to membrane, translocation	GO:0031204	0.046825	1.32952	5	1441	5	10296	WBGENE00001047,WBGENE00001303,WBGENE00007683,WBGENE00013311,WBGENE00021427
GO:CC	cytoplasm	GO:0005737	1.37e-84	83.8642	3514	1691	889	11201	WBGENE00000097,WBGENE00000101,WBGENE00000114,WBGENE00000150,WBGENE00000155,WBGENE00000158,WBGENE00000160,WBGENE00000184,WBGENE00000198,WBGENE00000206,WBGENE00000209,WBGENE00000230,WBGENE00000231,WBGENE00000248,WBGENE00000259,WBGENE00000293,WBGENE00000376,WBGENE00000379,WBGENE00000389,WBGENE00000472,WBGENE00000500,WBGENE00000534,WBGENE00000567,WBGENE00000800,WBGENE00000802,WBGENE00000869,WBGENE000…
GO:CC	intracellular anatomical structure	GO:0005622	5.39e-52	51.2687	5578	1691	1133	11201	WBGENE00000019,WBGENE00000020,WBGENE00000023,WBGENE00000097,WBGENE00000101,WBGENE00000114,WBGENE00000122,WBGENE00000150,WBGENE00000155,WBGENE00000158,WBGENE00000160,WBGENE00000184,WBGENE00000198,WBGENE00000206,WBGENE00000209,WBGENE00000226,WBGENE00000229,WBGENE00000230,WBGENE00000231,WBGENE00000248,WBGENE00000257,WBGENE00000259,WBGENE00000293,WBGENE00000376,WBGENE00000379,WBGENE00000389,WBGENE000…
GO:CC	organelle membrane	GO:0031090	1.09e-42	41.9642	806	1691	275	11201	WBGENE00000101,WBGENE00000158,WBGENE00000184,WBGENE00000198,WBGENE00000206,WBGENE00000209,WBGENE00000230,WBGENE00000869,WBGENE00000896,WBGENE00001239,WBGENE00001245,WBGENE00001246,WBGENE00001303,WBGENE00001334,WBGENE00001414,WBGENE00001424,WBGENE00001509,WBGENE00001632,WBGENE00001645,WBGENE00001662,WBGENE00001996,WBGENE00002070,WBGENE00002162,WBGENE00003061,WBGENE00003793,WBGENE00003805,WBGENE000…
GO:CC	intracellular organelle	GO:0043229	1.71e-36	35.7662	4765	1691	964	11201	WBGENE00000019,WBGENE00000020,WBGENE00000023,WBGENE00000097,WBGENE00000101,WBGENE00000114,WBGENE00000122,WBGENE00000150,WBGENE00000158,WBGENE00000184,WBGENE00000198,WBGENE00000206,WBGENE00000209,WBGENE00000226,WBGENE00000230,WBGENE00000248,WBGENE00000257,WBGENE00000293,WBGENE00000376,WBGENE00000389,WBGENE00000467,WBGENE00000472,WBGENE00000475,WBGENE00000500,WBGENE00000517,WBGENE00000567,WBGENE000…
GO:CC	organelle	GO:0043226	2.62e-34	33.5819	4839	1691	968	11201	WBGENE00000019,WBGENE00000020,WBGENE00000023,WBGENE00000097,WBGENE00000101,WBGENE00000114,WBGENE00000122,WBGENE00000150,WBGENE00000158,WBGENE00000184,WBGENE00000198,WBGENE00000206,WBGENE00000209,WBGENE00000226,WBGENE00000230,WBGENE00000248,WBGENE00000257,WBGENE00000293,WBGENE00000376,WBGENE00000389,WBGENE00000467,WBGENE00000472,WBGENE00000475,WBGENE00000500,WBGENE00000517,WBGENE00000567,WBGENE000…
GO:CC	membrane protein complex	GO:0098796	3.92e-31	30.4065	353	1691	145	11201	WBGENE00000150,WBGENE00000158,WBGENE00000160,WBGENE00000206,WBGENE00000209,WBGENE00000229,WBGENE00000230,WBGENE00000869,WBGENE00000896,WBGENE00001303,WBGENE00001662,WBGENE00002162,WBGENE00003061,WBGENE00003225,WBGENE00003403,WBGENE00003806,WBGENE00003831,WBGENE00004754,WBGENE00004755,WBGENE00004756,WBGENE00004759,WBGENE00004768,WBGENE00004899,WBGENE00004959,WBGENE00004976,WBGENE00006311,WBGENE000…
GO:CC	endomembrane system	GO:0012505	1.1e-28	27.9577	931	1691	272	11201	WBGENE00000097,WBGENE00000101,WBGENE00000158,WBGENE00000184,WBGENE00000198,WBGENE00000472,WBGENE00000567,WBGENE00000802,WBGENE00000896,WBGENE00001046,WBGENE00001047,WBGENE00001239,WBGENE00001245,WBGENE00001246,WBGENE00001303,WBGENE00001334,WBGENE00001632,WBGENE00001639,WBGENE00001645,WBGENE00001996,WBGENE00002070,WBGENE00003735,WBGENE00003793,WBGENE00003805,WBGENE00003806,WBGENE00003906,WBGENE000…
GO:CC	endoplasmic reticulum	GO:0005783	2.4e-24	23.6201	463	1691	160	11201	WBGENE00000097,WBGENE00000198,WBGENE00000472,WBGENE00000567,WBGENE00000802,WBGENE00000896,WBGENE00001046,WBGENE00001047,WBGENE00001239,WBGENE00001245,WBGENE00001246,WBGENE00001303,WBGENE00001334,WBGENE00002070,WBGENE00003806,WBGENE00003906,WBGENE00003964,WBGENE00004063,WBGENE00004076,WBGENE00004441,WBGENE00004490,WBGENE00004492,WBGENE00004497,WBGENE00004736,WBGENE00004754,WBGENE00004755,WBGENE000…
GO:CC	intracellular membrane-bounded organelle	GO:0043231	1.79e-22	21.7476	4145	1691	815	11201	WBGENE00000019,WBGENE00000020,WBGENE00000023,WBGENE00000097,WBGENE00000101,WBGENE00000114,WBGENE00000122,WBGENE00000150,WBGENE00000158,WBGENE00000184,WBGENE00000198,WBGENE00000206,WBGENE00000209,WBGENE00000226,WBGENE00000230,WBGENE00000257,WBGENE00000376,WBGENE00000389,WBGENE00000467,WBGENE00000472,WBGENE00000475,WBGENE00000517,WBGENE00000567,WBGENE00000802,WBGENE00000869,WBGENE00000896,WBGENE000…
GO:CC	organelle subcompartment	GO:0031984	3.55e-22	21.4494	302	1691	117	11201	WBGENE00000198,WBGENE00000896,WBGENE00001239,WBGENE00001245,WBGENE00001246,WBGENE00001303,WBGENE00001334,WBGENE00001639,WBGENE00001645,WBGENE00002070,WBGENE00003806,WBGENE00003906,WBGENE00004076,WBGENE00004274,WBGENE00004441,WBGENE00004497,WBGENE00004736,WBGENE00004754,WBGENE00004755,WBGENE00004756,WBGENE00004759,WBGENE00004768,WBGENE00004958,WBGENE00006733,WBGENE00006802,WBGENE00006833,WBGENE000…
GO:CC	mitochondrial membrane	GO:0031966	8.84e-21	20.0536	193	1691	86	11201	WBGENE00000206,WBGENE00000209,WBGENE00000230,WBGENE00000869,WBGENE00001424,WBGENE00001509,WBGENE00001662,WBGENE00002162,WBGENE00003061,WBGENE00003831,WBGENE00004931,WBGENE00004958,WBGENE00006433,WBGENE00006439,WBGENE00006491,WBGENE00006519,WBGENE00007080,WBGENE00007385,WBGENE00007622,WBGENE00007686,WBGENE00007880,WBGENE00007927,WBGENE00008137,WBGENE00008164,WBGENE00008410,WBGENE00008414,WBGENE000…
GO:CC	inner mitochondrial membrane protein complex	GO:0098800	8.99e-21	20.0462	86	1691	53	11201	WBGENE00000206,WBGENE00000209,WBGENE00000230,WBGENE00000869,WBGENE00002162,WBGENE00003061,WBGENE00003831,WBGENE00006433,WBGENE00006519,WBGENE00007385,WBGENE00007880,WBGENE00007927,WBGENE00008164,WBGENE00008414,WBGENE00008857,WBGENE00009051,WBGENE00009161,WBGENE00009712,WBGENE00009734,WBGENE00009739,WBGENE00009992,WBGENE00010326,WBGENE00011015,WBGENE00011017,WBGENE00011273,WBGENE00011897,WBGENE000…
GO:CC	mitochondrial envelope	GO:0005740	2.13e-20	19.6711	206	1691	89	11201	WBGENE00000206,WBGENE00000209,WBGENE00000230,WBGENE00000869,WBGENE00001424,WBGENE00001509,WBGENE00001662,WBGENE00002162,WBGENE00003061,WBGENE00003831,WBGENE00004931,WBGENE00004958,WBGENE00006433,WBGENE00006439,WBGENE00006491,WBGENE00006519,WBGENE00007080,WBGENE00007144,WBGENE00007385,WBGENE00007622,WBGENE00007686,WBGENE00007880,WBGENE00007927,WBGENE00008137,WBGENE00008164,WBGENE00008410,WBGENE000…
GO:CC	membrane-bounded organelle	GO:0043227	5.93e-20	19.2271	4252	1691	821	11201	WBGENE00000019,WBGENE00000020,WBGENE00000023,WBGENE00000097,WBGENE00000101,WBGENE00000114,WBGENE00000122,WBGENE00000150,WBGENE00000158,WBGENE00000184,WBGENE00000198,WBGENE00000206,WBGENE00000209,WBGENE00000226,WBGENE00000230,WBGENE00000257,WBGENE00000376,WBGENE00000389,WBGENE00000467,WBGENE00000472,WBGENE00000475,WBGENE00000517,WBGENE00000567,WBGENE00000802,WBGENE00000869,WBGENE00000896,WBGENE000…
GO:CC	organelle envelope	GO:0031967	1.73e-19	18.7616	273	1691	105	11201	WBGENE00000206,WBGENE00000209,WBGENE00000230,WBGENE00000869,WBGENE00001424,WBGENE00001509,WBGENE00001662,WBGENE00001996,WBGENE00002162,WBGENE00003061,WBGENE00003793,WBGENE00003805,WBGENE00003806,WBGENE00003831,WBGENE00004736,WBGENE00004931,WBGENE00004958,WBGENE00006311,WBGENE00006433,WBGENE00006439,WBGENE00006491,WBGENE00006519,WBGENE00006734,WBGENE00006736,WBGENE00007080,WBGENE00007144,WBGENE000…
GO:CC	envelope	GO:0031975	1.73e-19	18.7616	273	1691	105	11201	WBGENE00000206,WBGENE00000209,WBGENE00000230,WBGENE00000869,WBGENE00001424,WBGENE00001509,WBGENE00001662,WBGENE00001996,WBGENE00002162,WBGENE00003061,WBGENE00003793,WBGENE00003805,WBGENE00003806,WBGENE00003831,WBGENE00004736,WBGENE00004931,WBGENE00004958,WBGENE00006311,WBGENE00006433,WBGENE00006439,WBGENE00006491,WBGENE00006519,WBGENE00006734,WBGENE00006736,WBGENE00007080,WBGENE00007144,WBGENE000…
GO:CC	protein-containing complex	GO:0032991	8.6e-19	18.0657	1952	1691	435	11201	WBGENE00000150,WBGENE00000158,WBGENE00000160,WBGENE00000206,WBGENE00000209,WBGENE00000229,WBGENE00000230,WBGENE00000293,WBGENE00000369,WBGENE00000376,WBGENE00000379,WBGENE00000475,WBGENE00000836,WBGENE00000837,WBGENE00000838,WBGENE00000869,WBGENE00000875,WBGENE00000896,WBGENE00000938,WBGENE00000962,WBGENE00001005,WBGENE00001007,WBGENE00001092,WBGENE00001094,WBGENE00001209,WBGENE00001225,WBGENE000…
GO:CC	endoplasmic reticulum membrane	GO:0005789	1.54e-18	17.8123	244	1691	96	11201	WBGENE00000198,WBGENE00000896,WBGENE00001239,WBGENE00001245,WBGENE00001246,WBGENE00001303,WBGENE00001334,WBGENE00002070,WBGENE00003806,WBGENE00003906,WBGENE00004076,WBGENE00004441,WBGENE00004497,WBGENE00004736,WBGENE00004754,WBGENE00004755,WBGENE00004756,WBGENE00004759,WBGENE00004768,WBGENE00004958,WBGENE00006733,WBGENE00007102,WBGENE00007189,WBGENE00007626,WBGENE00007683,WBGENE00007696,WBGENE000…
GO:CC	nuclear outer membrane-endoplasmic reticulum membrane network	GO:0042175	1.58e-18	17.8004	248	1691	97	11201	WBGENE00000198,WBGENE00000896,WBGENE00001239,WBGENE00001245,WBGENE00001246,WBGENE00001303,WBGENE00001334,WBGENE00002070,WBGENE00003806,WBGENE00003906,WBGENE00004076,WBGENE00004441,WBGENE00004497,WBGENE00004736,WBGENE00004754,WBGENE00004755,WBGENE00004756,WBGENE00004759,WBGENE00004768,WBGENE00004958,WBGENE00006733,WBGENE00007102,WBGENE00007189,WBGENE00007626,WBGENE00007683,WBGENE00007696,WBGENE000…
GO:CC	endoplasmic reticulum subcompartment	GO:0098827	2.17e-18	17.6636	245	1691	96	11201	WBGENE00000198,WBGENE00000896,WBGENE00001239,WBGENE00001245,WBGENE00001246,WBGENE00001303,WBGENE00001334,WBGENE00002070,WBGENE00003806,WBGENE00003906,WBGENE00004076,WBGENE00004441,WBGENE00004497,WBGENE00004736,WBGENE00004754,WBGENE00004755,WBGENE00004756,WBGENE00004759,WBGENE00004768,WBGENE00004958,WBGENE00006733,WBGENE00007102,WBGENE00007189,WBGENE00007626,WBGENE00007683,WBGENE00007696,WBGENE000…
GO:CC	oxidoreductase complex	GO:1990204	2.81e-17	16.5521	60	1691	40	11201	WBGENE00000869,WBGENE00002162,WBGENE00003061,WBGENE00003225,WBGENE00003831,WBGENE00006433,WBGENE00006518,WBGENE00007824,WBGENE00007880,WBGENE00008414,WBGENE00009051,WBGENE00009082,WBGENE00009712,WBGENE00009739,WBGENE00009918,WBGENE00009992,WBGENE00010326,WBGENE00010778,WBGENE00012031,WBGENE00012166,WBGENE00013049,WBGENE00013237,WBGENE00013308,WBGENE00013406,WBGENE00014086,WBGENE00015755,WBGENE000…
GO:CC	mitochondrial inner membrane	GO:0005743	5.7e-17	16.2441	163	1691	72	11201	WBGENE00000206,WBGENE00000209,WBGENE00000230,WBGENE00000869,WBGENE00002162,WBGENE00003061,WBGENE00003831,WBGENE00004931,WBGENE00004958,WBGENE00006433,WBGENE00006439,WBGENE00006519,WBGENE00007080,WBGENE00007385,WBGENE00007622,WBGENE00007880,WBGENE00007927,WBGENE00008137,WBGENE00008164,WBGENE00008410,WBGENE00008414,WBGENE00008505,WBGENE00008857,WBGENE00009051,WBGENE00009161,WBGENE00009513,WBGENE000…
GO:CC	organelle inner membrane	GO:0019866	9.9e-17	16.0042	179	1691	76	11201	WBGENE00000206,WBGENE00000209,WBGENE00000230,WBGENE00000869,WBGENE00001996,WBGENE00002162,WBGENE00003061,WBGENE00003831,WBGENE00004931,WBGENE00004958,WBGENE00006311,WBGENE00006433,WBGENE00006439,WBGENE00006519,WBGENE00007080,WBGENE00007385,WBGENE00007622,WBGENE00007880,WBGENE00007927,WBGENE00008137,WBGENE00008164,WBGENE00008410,WBGENE00008414,WBGENE00008505,WBGENE00008857,WBGENE00009051,WBGENE000…
GO:CC	respirasome	GO:0070469	4.06e-16	15.3913	55	1691	37	11201	WBGENE00000869,WBGENE00002162,WBGENE00003061,WBGENE00003225,WBGENE00003831,WBGENE00004931,WBGENE00006433,WBGENE00006519,WBGENE00007880,WBGENE00008414,WBGENE00009051,WBGENE00009161,WBGENE00009712,WBGENE00009739,WBGENE00009992,WBGENE00010326,WBGENE00012166,WBGENE00012354,WBGENE00012553,WBGENE00013237,WBGENE00013308,WBGENE00013406,WBGENE00014086,WBGENE00015755,WBGENE00015810,WBGENE00016118,WBGENE000…
GO:CC	mitochondrial respirasome	GO:0005746	4.61e-16	15.3362	50	1691	35	11201	WBGENE00000869,WBGENE00002162,WBGENE00003061,WBGENE00003831,WBGENE00004931,WBGENE00006433,WBGENE00006519,WBGENE00007880,WBGENE00008414,WBGENE00009051,WBGENE00009161,WBGENE00009712,WBGENE00009739,WBGENE00009992,WBGENE00010326,WBGENE00012166,WBGENE00012354,WBGENE00012553,WBGENE00013237,WBGENE00013308,WBGENE00013406,WBGENE00014086,WBGENE00015755,WBGENE00015810,WBGENE00016118,WBGENE00016392,WBGENE000…
GO:CC	respiratory chain complex	GO:0098803	3.29e-15	14.4823	52	1691	35	11201	WBGENE00000869,WBGENE00002162,WBGENE00003061,WBGENE00003225,WBGENE00003831,WBGENE00006433,WBGENE00006519,WBGENE00007880,WBGENE00008414,WBGENE00009051,WBGENE00009161,WBGENE00009712,WBGENE00009739,WBGENE00009992,WBGENE00010326,WBGENE00012166,WBGENE00012354,WBGENE00012553,WBGENE00013237,WBGENE00013308,WBGENE00013406,WBGENE00014086,WBGENE00015755,WBGENE00015810,WBGENE00016118,WBGENE00016392,WBGENE000…
GO:CC	catalytic complex	GO:1902494	1.11e-13	12.9556	552	1691	155	11201	WBGENE00000836,WBGENE00000837,WBGENE00000838,WBGENE00000869,WBGENE00000896,WBGENE00000938,WBGENE00000962,WBGENE00001005,WBGENE00001007,WBGENE00002162,WBGENE00002344,WBGENE00002717,WBGENE00003061,WBGENE00003225,WBGENE00003509,WBGENE00003831,WBGENE00003922,WBGENE00003925,WBGENE00003926,WBGENE00003927,WBGENE00003928,WBGENE00003947,WBGENE00003948,WBGENE00003951,WBGENE00003952,WBGENE00003953,WBGENE000…
GO:CC	extrinsic component of cytoplasmic side of plasma membrane	GO:0031234	2.17e-13	12.6644	46	1691	31	11201	WBGENE00002193,WBGENE00002198,WBGENE00002204,WBGENE00002206,WBGENE00002208,WBGENE00004962,WBGENE00009039,WBGENE00009160,WBGENE00010712,WBGENE00011039,WBGENE00012010,WBGENE00012011,WBGENE00012172,WBGENE00012785,WBGENE00013475,WBGENE00013801,WBGENE00013811,WBGENE00015994,WBGENE00016085,WBGENE00016416,WBGENE00016462,WBGENE00016954,WBGENE00017736,WBGENE00018999,WBGENE00019081,WBGENE00020003,WBGENE000…
GO:CC	cytosolic ribosome	GO:0022626	2.62e-13	12.5818	78	1691	42	11201	WBGENE00004408,WBGENE00004409,WBGENE00004410,WBGENE00004415,WBGENE00004416,WBGENE00004418,WBGENE00004419,WBGENE00004420,WBGENE00004422,WBGENE00004424,WBGENE00004426,WBGENE00004428,WBGENE00004430,WBGENE00004431,WBGENE00004433,WBGENE00004441,WBGENE00004442,WBGENE00004445,WBGENE00004447,WBGENE00004448,WBGENE00004449,WBGENE00004452,WBGENE00004453,WBGENE00004470,WBGENE00004471,WBGENE00004472,WBGENE000…
GO:CC	bounding membrane of organelle	GO:0098588	2.76e-13	12.5589	378	1691	117	11201	WBGENE00000101,WBGENE00000158,WBGENE00000184,WBGENE00001303,WBGENE00001424,WBGENE00001509,WBGENE00001632,WBGENE00001645,WBGENE00001662,WBGENE00002070,WBGENE00003806,WBGENE00004063,WBGENE00004075,WBGENE00004101,WBGENE00004271,WBGENE00004272,WBGENE00004274,WBGENE00004373,WBGENE00004441,WBGENE00004497,WBGENE00004736,WBGENE00004754,WBGENE00004755,WBGENE00004756,WBGENE00004958,WBGENE00005020,WBGENE000…
GO:CC	endoplasmic reticulum protein-containing complex	GO:0140534	5.45e-13	12.2638	47	1691	31	11201	WBGENE00000896,WBGENE00001303,WBGENE00004759,WBGENE00004768,WBGENE00006733,WBGENE00007189,WBGENE00008053,WBGENE00008918,WBGENE00009521,WBGENE00011306,WBGENE00011860,WBGENE00011914,WBGENE00011932,WBGENE00012550,WBGENE00013311,WBGENE00014249,WBGENE00016395,WBGENE00016439,WBGENE00017999,WBGENE00018006,WBGENE00019209,WBGENE00019693,WBGENE00019725,WBGENE00020683,WBGENE00020781,WBGENE00021427,WBGENE000…
GO:CC	mitochondrion	GO:0005739	7.02e-13	12.1538	612	1691	165	11201	WBGENE00000114,WBGENE00000206,WBGENE00000209,WBGENE00000230,WBGENE00000869,WBGENE00001424,WBGENE00001509,WBGENE00001662,WBGENE00002162,WBGENE00002238,WBGENE00003061,WBGENE00003831,WBGENE00004930,WBGENE00004931,WBGENE00004958,WBGENE00006059,WBGENE00006433,WBGENE00006439,WBGENE00006491,WBGENE00006518,WBGENE00006519,WBGENE00006565,WBGENE00007080,WBGENE00007144,WBGENE00007190,WBGENE00007385,WBGENE000…
GO:CC	mitochondrial protein-containing complex	GO:0098798	5.59e-12	11.2526	167	1691	65	11201	WBGENE00000206,WBGENE00000209,WBGENE00000230,WBGENE00000869,WBGENE00001662,WBGENE00002162,WBGENE00003061,WBGENE00003831,WBGENE00006433,WBGENE00006518,WBGENE00006519,WBGENE00007385,WBGENE00007444,WBGENE00007686,WBGENE00007824,WBGENE00007880,WBGENE00007927,WBGENE00008164,WBGENE00008414,WBGENE00008452,WBGENE00008459,WBGENE00008857,WBGENE00009051,WBGENE00009161,WBGENE00009313,WBGENE00009712,WBGENE000…
GO:CC	cytoplasmic side of membrane	GO:0098562	8.62e-12	11.0643	65	1691	36	11201	WBGENE00000184,WBGENE00002193,WBGENE00002198,WBGENE00002204,WBGENE00002206,WBGENE00002208,WBGENE00004441,WBGENE00004497,WBGENE00004962,WBGENE00007979,WBGENE00009039,WBGENE00009160,WBGENE00010712,WBGENE00011039,WBGENE00012010,WBGENE00012011,WBGENE00012172,WBGENE00012785,WBGENE00013475,WBGENE00013801,WBGENE00013811,WBGENE00015994,WBGENE00016085,WBGENE00016416,WBGENE00016462,WBGENE00016954,WBGENE000…
GO:CC	proton-transporting two-sector ATPase complex	GO:0016469	6.47e-11	10.1889	39	1691	26	11201	WBGENE00000206,WBGENE00000209,WBGENE00000229,WBGENE00000230,WBGENE00004959,WBGENE00006768,WBGENE00006911,WBGENE00006917,WBGENE00006918,WBGENE00006919,WBGENE00006920,WBGENE00007385,WBGENE00009882,WBGENE00010130,WBGENE00010419,WBGENE00011015,WBGENE00011273,WBGENE00013025,WBGENE00016258,WBGENE00017982,WBGENE00018698,WBGENE00019061,WBGENE00020275,WBGENE00021952,WBGENE00022089,WBGENE00022336
GO:CC	side of membrane	GO:0098552	8.62e-11	10.0646	72	1691	37	11201	WBGENE00000184,WBGENE00002193,WBGENE00002198,WBGENE00002204,WBGENE00002206,WBGENE00002208,WBGENE00004441,WBGENE00004497,WBGENE00004962,WBGENE00007979,WBGENE00009039,WBGENE00009160,WBGENE00010712,WBGENE00011039,WBGENE00012010,WBGENE00012011,WBGENE00012172,WBGENE00012785,WBGENE00013475,WBGENE00013801,WBGENE00013811,WBGENE00015994,WBGENE00016085,WBGENE00016416,WBGENE00016462,WBGENE00016954,WBGENE000…
GO:CC	cytoplasmic side of plasma membrane	GO:0009898	1.27e-10	9.89569	60	1691	33	11201	WBGENE00000184,WBGENE00002193,WBGENE00002198,WBGENE00002204,WBGENE00002206,WBGENE00002208,WBGENE00004962,WBGENE00009039,WBGENE00009160,WBGENE00010712,WBGENE00011039,WBGENE00012010,WBGENE00012011,WBGENE00012172,WBGENE00012785,WBGENE00013475,WBGENE00013801,WBGENE00013811,WBGENE00015994,WBGENE00016085,WBGENE00016416,WBGENE00016462,WBGENE00016954,WBGENE00016961,WBGENE00017736,WBGENE00018999,WBGENE000…
GO:CC	Golgi apparatus	GO:0005794	4.61e-10	9.33633	299	1691	92	11201	WBGENE00000158,WBGENE00001632,WBGENE00001639,WBGENE00001645,WBGENE00002070,WBGENE00003735,WBGENE00004063,WBGENE00004075,WBGENE00004274,WBGENE00004958,WBGENE00004964,WBGENE00005020,WBGENE00005025,WBGENE00005153,WBGENE00006373,WBGENE00006785,WBGENE00006802,WBGENE00006833,WBGENE00007270,WBGENE00007626,WBGENE00007637,WBGENE00008136,WBGENE00008258,WBGENE00008346,WBGENE00008411,WBGENE00008424,WBGENE000…
GO:CC	extrinsic component of plasma membrane	GO:0019897	5e-10	9.30098	56	1691	31	11201	WBGENE00002193,WBGENE00002198,WBGENE00002204,WBGENE00002206,WBGENE00002208,WBGENE00004962,WBGENE00009039,WBGENE00009160,WBGENE00010712,WBGENE00011039,WBGENE00012010,WBGENE00012011,WBGENE00012172,WBGENE00012785,WBGENE00013475,WBGENE00013801,WBGENE00013811,WBGENE00015994,WBGENE00016085,WBGENE00016416,WBGENE00016462,WBGENE00016954,WBGENE00017736,WBGENE00018999,WBGENE00019081,WBGENE00020003,WBGENE000…
GO:CC	cytosol	GO:0005829	8.5e-10	9.07049	449	1691	123	11201	WBGENE00000379,WBGENE00001029,WBGENE00001030,WBGENE00001031,WBGENE00001037,WBGENE00001094,WBGENE00002002,WBGENE00002066,WBGENE00002238,WBGENE00003902,WBGENE00003906,WBGENE00004075,WBGENE00004274,WBGENE00004408,WBGENE00004409,WBGENE00004410,WBGENE00004415,WBGENE00004416,WBGENE00004418,WBGENE00004419,WBGENE00004420,WBGENE00004422,WBGENE00004424,WBGENE00004426,WBGENE00004428,WBGENE00004430,WBGENE000…
GO:CC	endopeptidase complex	GO:1905369	1.28e-09	8.89162	37	1691	24	11201	WBGENE00003922,WBGENE00003925,WBGENE00003926,WBGENE00003927,WBGENE00003928,WBGENE00003947,WBGENE00003948,WBGENE00003951,WBGENE00003952,WBGENE00003953,WBGENE00004458,WBGENE00004460,WBGENE00004461,WBGENE00004464,WBGENE00004465,WBGENE00004468,WBGENE00004504,WBGENE00004506,WBGENE00006856,WBGENE00008918,WBGENE00011914,WBGENE00015688,WBGENE00018006,WBGENE00018135
GO:CC	mitochondrial respiratory chain complex I	GO:0005747	1.66e-09	8.77871	32	1691	22	11201	WBGENE00003061,WBGENE00003831,WBGENE00007880,WBGENE00008414,WBGENE00009051,WBGENE00009712,WBGENE00009992,WBGENE00010326,WBGENE00012166,WBGENE00013237,WBGENE00013308,WBGENE00013406,WBGENE00014086,WBGENE00015810,WBGENE00016118,WBGENE00016393,WBGENE00019401,WBGENE00020417,WBGENE00021562,WBGENE00021839,WBGENE00021849,WBGENE00022075
GO:CC	NADH dehydrogenase complex	GO:0030964	1.66e-09	8.77871	32	1691	22	11201	WBGENE00003061,WBGENE00003831,WBGENE00007880,WBGENE00008414,WBGENE00009051,WBGENE00009712,WBGENE00009992,WBGENE00010326,WBGENE00012166,WBGENE00013237,WBGENE00013308,WBGENE00013406,WBGENE00014086,WBGENE00015810,WBGENE00016118,WBGENE00016393,WBGENE00019401,WBGENE00020417,WBGENE00021562,WBGENE00021839,WBGENE00021849,WBGENE00022075
GO:CC	respiratory chain complex I	GO:0045271	1.66e-09	8.77871	32	1691	22	11201	WBGENE00003061,WBGENE00003831,WBGENE00007880,WBGENE00008414,WBGENE00009051,WBGENE00009712,WBGENE00009992,WBGENE00010326,WBGENE00012166,WBGENE00013237,WBGENE00013308,WBGENE00013406,WBGENE00014086,WBGENE00015810,WBGENE00016118,WBGENE00016393,WBGENE00019401,WBGENE00020417,WBGENE00021562,WBGENE00021839,WBGENE00021849,WBGENE00022075
GO:CC	integral component of organelle membrane	GO:0031301	1.61e-08	7.793	132	1691	50	11201	WBGENE00001239,WBGENE00001245,WBGENE00001246,WBGENE00001414,WBGENE00001424,WBGENE00005153,WBGENE00006311,WBGENE00006785,WBGENE00007080,WBGENE00007683,WBGENE00007696,WBGENE00007979,WBGENE00008137,WBGENE00008410,WBGENE00008505,WBGENE00008857,WBGENE00008918,WBGENE00009045,WBGENE00009313,WBGENE00009435,WBGENE00009513,WBGENE00009783,WBGENE00010178,WBGENE00010496,WBGENE00010755,WBGENE00011493,WBGENE000…
GO:CC	proteasome complex	GO:0000502	1.92e-08	7.71734	32	1691	21	11201	WBGENE00003922,WBGENE00003925,WBGENE00003926,WBGENE00003927,WBGENE00003928,WBGENE00003947,WBGENE00003948,WBGENE00003951,WBGENE00003952,WBGENE00003953,WBGENE00004458,WBGENE00004460,WBGENE00004461,WBGENE00004464,WBGENE00004465,WBGENE00004468,WBGENE00004504,WBGENE00004506,WBGENE00006856,WBGENE00015688,WBGENE00018135
GO:CC	cytosolic large ribosomal subunit	GO:0022625	2.91e-08	7.53632	47	1691	26	11201	WBGENE00004408,WBGENE00004409,WBGENE00004410,WBGENE00004415,WBGENE00004416,WBGENE00004418,WBGENE00004419,WBGENE00004420,WBGENE00004422,WBGENE00004424,WBGENE00004426,WBGENE00004428,WBGENE00004430,WBGENE00004431,WBGENE00004433,WBGENE00004441,WBGENE00004442,WBGENE00004445,WBGENE00004447,WBGENE00004448,WBGENE00004449,WBGENE00004452,WBGENE00004453,WBGENE00012179,WBGENE00016493,WBGENE00017997
GO:CC	intrinsic component of organelle membrane	GO:0031300	4.1e-08	7.38748	135	1691	50	11201	WBGENE00001239,WBGENE00001245,WBGENE00001246,WBGENE00001414,WBGENE00001424,WBGENE00005153,WBGENE00006311,WBGENE00006785,WBGENE00007080,WBGENE00007683,WBGENE00007696,WBGENE00007979,WBGENE00008137,WBGENE00008410,WBGENE00008505,WBGENE00008857,WBGENE00008918,WBGENE00009045,WBGENE00009313,WBGENE00009435,WBGENE00009513,WBGENE00009783,WBGENE00010178,WBGENE00010496,WBGENE00010755,WBGENE00011493,WBGENE000…
GO:CC	peptidase complex	GO:1905368	7.72e-08	7.11217	55	1691	28	11201	WBGENE00003922,WBGENE00003925,WBGENE00003926,WBGENE00003927,WBGENE00003928,WBGENE00003947,WBGENE00003948,WBGENE00003951,WBGENE00003952,WBGENE00003953,WBGENE00004458,WBGENE00004460,WBGENE00004461,WBGENE00004464,WBGENE00004465,WBGENE00004468,WBGENE00004504,WBGENE00004506,WBGENE00006856,WBGENE00008918,WBGENE00011914,WBGENE00012550,WBGENE00015208,WBGENE00015688,WBGENE00016395,WBGENE00018006,WBGENE000…
GO:CC	extrinsic component of membrane	GO:0019898	1.45e-07	6.83742	77	1691	34	11201	WBGENE00002193,WBGENE00002198,WBGENE00002204,WBGENE00002206,WBGENE00002208,WBGENE00004962,WBGENE00006594,WBGENE00009039,WBGENE00009160,WBGENE00010712,WBGENE00011039,WBGENE00011629,WBGENE00012010,WBGENE00012011,WBGENE00012172,WBGENE00012785,WBGENE00013475,WBGENE00013801,WBGENE00013811,WBGENE00015994,WBGENE00016085,WBGENE00016120,WBGENE00016416,WBGENE00016462,WBGENE00016954,WBGENE00017736,WBGENE000…
GO:CC	ribosomal subunit	GO:0044391	1.04e-06	5.98406	138	1691	48	11201	WBGENE00004408,WBGENE00004409,WBGENE00004410,WBGENE00004415,WBGENE00004416,WBGENE00004418,WBGENE00004419,WBGENE00004420,WBGENE00004422,WBGENE00004424,WBGENE00004426,WBGENE00004428,WBGENE00004430,WBGENE00004431,WBGENE00004433,WBGENE00004441,WBGENE00004442,WBGENE00004445,WBGENE00004447,WBGENE00004448,WBGENE00004449,WBGENE00004452,WBGENE00004453,WBGENE00004470,WBGENE00004471,WBGENE00004472,WBGENE000…
GO:CC	proton-transporting two-sector ATPase complex, catalytic domain	GO:0033178	4.17e-06	5.37998	17	1691	13	11201	WBGENE00000229,WBGENE00000230,WBGENE00004959,WBGENE00006917,WBGENE00006918,WBGENE00006920,WBGENE00010419,WBGENE00013025,WBGENE00017982,WBGENE00018698,WBGENE00019061,WBGENE00021952,WBGENE00022089
GO:CC	coated vesicle	GO:0030135	1.11e-05	4.95464	62	1691	27	11201	WBGENE00000150,WBGENE00000158,WBGENE00002070,WBGENE00003806,WBGENE00004272,WBGENE00004754,WBGENE00004755,WBGENE00004756,WBGENE00009829,WBGENE00010178,WBGENE00010670,WBGENE00010713,WBGENE00011218,WBGENE00011338,WBGENE00011775,WBGENE00011867,WBGENE00013360,WBGENE00013985,WBGENE00015734,WBGENE00016960,WBGENE00019003,WBGENE00019757,WBGENE00020246,WBGENE00021292,WBGENE00021561,WBGENE00022119,WBGENE000…
GO:CC	proton-transporting ATP synthase complex	GO:0045259	1.29e-05	4.8886	18	1691	13	11201	WBGENE00000206,WBGENE00000209,WBGENE00000229,WBGENE00000230,WBGENE00007385,WBGENE00010419,WBGENE00011015,WBGENE00011273,WBGENE00017982,WBGENE00019061,WBGENE00020275,WBGENE00022089,WBGENE00022336
GO:CC	vesicle coat	GO:0030120	2.41e-05	4.61819	24	1691	15	11201	WBGENE00000158,WBGENE00003806,WBGENE00004754,WBGENE00004755,WBGENE00004756,WBGENE00011218,WBGENE00011338,WBGENE00011775,WBGENE00011867,WBGENE00015734,WBGENE00020246,WBGENE00021292,WBGENE00021561,WBGENE00022119,WBGENE00022678
GO:CC	spindle	GO:0005819	3.62e-05	4.44106	65	1691	27	11201	WBGENE00000257,WBGENE00000875,WBGENE00002219,WBGENE00003777,WBGENE00004274,WBGENE00004888,WBGENE00004952,WBGENE00006381,WBGENE00006528,WBGENE00006536,WBGENE00006537,WBGENE00006540,WBGENE00006595,WBGENE00006974,WBGENE00006994,WBGENE00007190,WBGENE00008166,WBGENE00010785,WBGENE00012004,WBGENE00012156,WBGENE00015515,WBGENE00015855,WBGENE00017643,WBGENE00017699,WBGENE00020070,WBGENE00021097,WBGENE000…
GO:CC	coated vesicle membrane	GO:0030662	4.64e-05	4.33363	34	1691	18	11201	WBGENE00000158,WBGENE00003806,WBGENE00004754,WBGENE00004755,WBGENE00004756,WBGENE00010713,WBGENE00011218,WBGENE00011338,WBGENE00011775,WBGENE00011867,WBGENE00013985,WBGENE00015734,WBGENE00019757,WBGENE00020246,WBGENE00021292,WBGENE00021561,WBGENE00022119,WBGENE00022678
GO:CC	ribosome	GO:0005840	5.27e-05	4.27824	191	1691	56	11201	WBGENE00004408,WBGENE00004409,WBGENE00004410,WBGENE00004415,WBGENE00004416,WBGENE00004418,WBGENE00004419,WBGENE00004420,WBGENE00004422,WBGENE00004424,WBGENE00004426,WBGENE00004428,WBGENE00004430,WBGENE00004431,WBGENE00004433,WBGENE00004439,WBGENE00004441,WBGENE00004442,WBGENE00004445,WBGENE00004447,WBGENE00004448,WBGENE00004449,WBGENE00004452,WBGENE00004453,WBGENE00004456,WBGENE00004470,WBGENE000…
GO:CC	membrane coat	GO:0030117	8.21e-05	4.08589	35	1691	18	11201	WBGENE00000150,WBGENE00000158,WBGENE00000160,WBGENE00003806,WBGENE00004754,WBGENE00004755,WBGENE00004756,WBGENE00009542,WBGENE00011218,WBGENE00011338,WBGENE00011775,WBGENE00011867,WBGENE00015734,WBGENE00020246,WBGENE00021292,WBGENE00021561,WBGENE00022119,WBGENE00022678
GO:CC	coated membrane	GO:0048475	8.21e-05	4.08589	35	1691	18	11201	WBGENE00000150,WBGENE00000158,WBGENE00000160,WBGENE00003806,WBGENE00004754,WBGENE00004755,WBGENE00004756,WBGENE00009542,WBGENE00011218,WBGENE00011338,WBGENE00011775,WBGENE00011867,WBGENE00015734,WBGENE00020246,WBGENE00021292,WBGENE00021561,WBGENE00022119,WBGENE00022678
GO:CC	cytosolic small ribosomal subunit	GO:0022627	0.000102	3.99208	29	1691	16	11201	WBGENE00004470,WBGENE00004471,WBGENE00004472,WBGENE00004473,WBGENE00004474,WBGENE00004476,WBGENE00004477,WBGENE00004480,WBGENE00004484,WBGENE00004485,WBGENE00004490,WBGENE00004492,WBGENE00004496,WBGENE00004497,WBGENE00004499,WBGENE00006728
GO:CC	rough endoplasmic reticulum	GO:0005791	0.000107	3.97073	15	1691	11	11201	WBGENE00001303,WBGENE00004441,WBGENE00004490,WBGENE00004492,WBGENE00004497,WBGENE00007696,WBGENE00009521,WBGENE00011306,WBGENE00013311,WBGENE00014204,WBGENE00021427
GO:CC	cytoskeleton	GO:0005856	0.000135	3.86845	381	1691	93	11201	WBGENE00000248,WBGENE00000257,WBGENE00000293,WBGENE00000777,WBGENE00000875,WBGENE00000962,WBGENE00001005,WBGENE00001007,WBGENE00001333,WBGENE00001488,WBGENE00001491,WBGENE00002036,WBGENE00002201,WBGENE00002214,WBGENE00002219,WBGENE00002694,WBGENE00003777,WBGENE00004274,WBGENE00004357,WBGENE00004855,WBGENE00004888,WBGENE00004952,WBGENE00004953,WBGENE00004955,WBGENE00004958,WBGENE00004969,WBGENE000…
GO:CC	Golgi membrane	GO:0000139	0.000226	3.64496	143	1691	44	11201	WBGENE00001632,WBGENE00001645,WBGENE00002070,WBGENE00004063,WBGENE00004075,WBGENE00004274,WBGENE00005020,WBGENE00005025,WBGENE00005153,WBGENE00006373,WBGENE00006785,WBGENE00006833,WBGENE00007270,WBGENE00007626,WBGENE00008258,WBGENE00008411,WBGENE00008800,WBGENE00009435,WBGENE00009654,WBGENE00009783,WBGENE00010178,WBGENE00010284,WBGENE00010713,WBGENE00011071,WBGENE00011775,WBGENE00011975,WBGENE000…
GO:CC	proteasome regulatory particle	GO:0005838	0.000258	3.58847	11	1691	9	11201	WBGENE00004458,WBGENE00004461,WBGENE00004464,WBGENE00004465,WBGENE00004468,WBGENE00004504,WBGENE00004506,WBGENE00015688,WBGENE00018135
GO:CC	proton-transporting V-type ATPase complex	GO:0033176	0.000378	3.42222	19	1691	12	11201	WBGENE00004959,WBGENE00006768,WBGENE00006911,WBGENE00006918,WBGENE00006919,WBGENE00006920,WBGENE00009882,WBGENE00010130,WBGENE00013025,WBGENE00016258,WBGENE00018698,WBGENE00021952
GO:CC	proteasome core complex	GO:0005839	0.000525	3.27989	14	1691	10	11201	WBGENE00003922,WBGENE00003925,WBGENE00003926,WBGENE00003927,WBGENE00003928,WBGENE00003947,WBGENE00003948,WBGENE00003951,WBGENE00003952,WBGENE00003953
GO:CC	mitochondrial proton-transporting ATP synthase complex	GO:0005753	0.000525	3.27989	14	1691	10	11201	WBGENE00000206,WBGENE00000209,WBGENE00000230,WBGENE00007385,WBGENE00011015,WBGENE00011273,WBGENE00017982,WBGENE00019061,WBGENE00020275,WBGENE00022336
GO:CC	intracellular protein-containing complex	GO:0140535	0.000648	3.18829	321	1691	79	11201	WBGENE00000369,WBGENE00000376,WBGENE00000836,WBGENE00000837,WBGENE00000838,WBGENE00002196,WBGENE00002344,WBGENE00002583,WBGENE00002845,WBGENE00003922,WBGENE00003925,WBGENE00003926,WBGENE00003927,WBGENE00003928,WBGENE00003947,WBGENE00003948,WBGENE00003951,WBGENE00003952,WBGENE00003953,WBGENE00004320,WBGENE00004458,WBGENE00004460,WBGENE00004461,WBGENE00004464,WBGENE00004465,WBGENE00004468,WBGENE000…
GO:CC	COPII-coated ER to Golgi transport vesicle	GO:0030134	0.000674	3.17127	29	1691	15	11201	WBGENE00002070,WBGENE00003806,WBGENE00004754,WBGENE00004755,WBGENE00004756,WBGENE00009829,WBGENE00010178,WBGENE00010670,WBGENE00010713,WBGENE00011338,WBGENE00013360,WBGENE00013985,WBGENE00019003,WBGENE00019757,WBGENE00022678
GO:CC	large ribosomal subunit	GO:0015934	0.000682	3.1661	82	1691	29	11201	WBGENE00004408,WBGENE00004409,WBGENE00004410,WBGENE00004415,WBGENE00004416,WBGENE00004418,WBGENE00004419,WBGENE00004420,WBGENE00004422,WBGENE00004424,WBGENE00004426,WBGENE00004428,WBGENE00004430,WBGENE00004431,WBGENE00004433,WBGENE00004441,WBGENE00004442,WBGENE00004445,WBGENE00004447,WBGENE00004448,WBGENE00004449,WBGENE00004452,WBGENE00004453,WBGENE00008459,WBGENE00011412,WBGENE00011740,WBGENE000…
GO:CC	transmembrane transporter complex	GO:1902495	0.000871	3.05994	100	1691	33	11201	WBGENE00000869,WBGENE00002162,WBGENE00003061,WBGENE00003403,WBGENE00003831,WBGENE00004976,WBGENE00007880,WBGENE00008074,WBGENE00008185,WBGENE00008186,WBGENE00008414,WBGENE00009051,WBGENE00009712,WBGENE00009739,WBGENE00009992,WBGENE00010326,WBGENE00012166,WBGENE00013237,WBGENE00013308,WBGENE00013406,WBGENE00014086,WBGENE00015755,WBGENE00015810,WBGENE00016118,WBGENE00016393,WBGENE00019007,WBGENE000…
GO:CC	proteasome accessory complex	GO:0022624	0.000893	3.04931	12	1691	9	11201	WBGENE00004458,WBGENE00004461,WBGENE00004464,WBGENE00004465,WBGENE00004468,WBGENE00004504,WBGENE00004506,WBGENE00015688,WBGENE00018135
GO:CC	Golgi-associated vesicle membrane	GO:0030660	0.001361	2.86619	15	1691	10	11201	WBGENE00000158,WBGENE00007979,WBGENE00011218,WBGENE00011775,WBGENE00011867,WBGENE00015734,WBGENE00020246,WBGENE00021292,WBGENE00021561,WBGENE00022119
GO:CC	rough endoplasmic reticulum membrane	GO:0030867	0.001409	2.85112	10	1691	8	11201	WBGENE00001303,WBGENE00004441,WBGENE00004497,WBGENE00009521,WBGENE00011306,WBGENE00013311,WBGENE00014204,WBGENE00021427
GO:CC	Golgi-associated vesicle	GO:0005798	0.001604	2.79489	18	1691	11	11201	WBGENE00000158,WBGENE00004272,WBGENE00007979,WBGENE00011218,WBGENE00011775,WBGENE00011867,WBGENE00015734,WBGENE00020246,WBGENE00021292,WBGENE00021561,WBGENE00022119
GO:CC	proton-transporting two-sector ATPase complex, proton-transporting domain	GO:0033177	0.001641	2.78482	21	1691	12	11201	WBGENE00000206,WBGENE00000209,WBGENE00000230,WBGENE00006768,WBGENE00006911,WBGENE00007385,WBGENE00009882,WBGENE00011015,WBGENE00011273,WBGENE00016258,WBGENE00020275,WBGENE00022336
GO:CC	transporter complex	GO:1990351	0.001772	2.75151	103	1691	33	11201	WBGENE00000869,WBGENE00002162,WBGENE00003061,WBGENE00003403,WBGENE00003831,WBGENE00004976,WBGENE00007880,WBGENE00008074,WBGENE00008185,WBGENE00008186,WBGENE00008414,WBGENE00009051,WBGENE00009712,WBGENE00009739,WBGENE00009992,WBGENE00010326,WBGENE00012166,WBGENE00013237,WBGENE00013308,WBGENE00013406,WBGENE00014086,WBGENE00015755,WBGENE00015810,WBGENE00016118,WBGENE00016393,WBGENE00019007,WBGENE000…
GO:CC	COPII vesicle coat	GO:0030127	0.001842	2.73477	6	1691	6	11201	WBGENE00003806,WBGENE00004754,WBGENE00004755,WBGENE00004756,WBGENE00011338,WBGENE00022678
GO:CC	intracellular non-membrane-bounded organelle	GO:0043232	0.0022	2.65766	1318	1691	252	11201	WBGENE00000226,WBGENE00000248,WBGENE00000257,WBGENE00000293,WBGENE00000500,WBGENE00000777,WBGENE00000875,WBGENE00000938,WBGENE00000962,WBGENE00001005,WBGENE00001007,WBGENE00001333,WBGENE00001488,WBGENE00001491,WBGENE00001830,WBGENE00001831,WBGENE00001855,WBGENE00001862,WBGENE00001869,WBGENE00001911,WBGENE00001944,WBGENE00001973,WBGENE00001996,WBGENE00001999,WBGENE00002036,WBGENE00002059,WBGENE000…
GO:CC	non-membrane-bounded organelle	GO:0043228	0.0022	2.65766	1318	1691	252	11201	WBGENE00000226,WBGENE00000248,WBGENE00000257,WBGENE00000293,WBGENE00000500,WBGENE00000777,WBGENE00000875,WBGENE00000938,WBGENE00000962,WBGENE00001005,WBGENE00001007,WBGENE00001333,WBGENE00001488,WBGENE00001491,WBGENE00001830,WBGENE00001831,WBGENE00001855,WBGENE00001862,WBGENE00001869,WBGENE00001911,WBGENE00001944,WBGENE00001973,WBGENE00001996,WBGENE00001999,WBGENE00002036,WBGENE00002059,WBGENE000…
GO:CC	cytochrome complex	GO:0070069	0.003137	2.50354	16	1691	10	11201	WBGENE00000869,WBGENE00002162,WBGENE00006519,WBGENE00009161,WBGENE00009739,WBGENE00012354,WBGENE00012553,WBGENE00015755,WBGENE00019007,WBGENE00020181
GO:CC	proton-transporting ATP synthase complex, coupling factor F(o)	GO:0045263	0.004478	2.34891	11	1691	8	11201	WBGENE00000206,WBGENE00000209,WBGENE00000230,WBGENE00007385,WBGENE00011015,WBGENE00011273,WBGENE00020275,WBGENE00022336
GO:CC	integral component of endoplasmic reticulum membrane	GO:0030176	0.006775	2.16912	61	1691	22	11201	WBGENE00001239,WBGENE00001245,WBGENE00001246,WBGENE00007683,WBGENE00007696,WBGENE00007979,WBGENE00008918,WBGENE00009045,WBGENE00010496,WBGENE00011529,WBGENE00011914,WBGENE00013740,WBGENE00016395,WBGENE00016439,WBGENE00017999,WBGENE00018006,WBGENE00018827,WBGENE00018847,WBGENE00019209,WBGENE00021840,WBGENE00021973,WBGENE00022776
GO:CC	Golgi apparatus subcompartment	GO:0098791	0.006985	2.15583	57	1691	21	11201	WBGENE00001639,WBGENE00001645,WBGENE00004274,WBGENE00006802,WBGENE00006833,WBGENE00007270,WBGENE00008346,WBGENE00009498,WBGENE00010040,WBGENE00010699,WBGENE00010713,WBGENE00011827,WBGENE00011975,WBGENE00012208,WBGENE00013034,WBGENE00013551,WBGENE00018017,WBGENE00020193,WBGENE00021561,WBGENE00021644,WBGENE00043064
GO:CC	mitochondrial proton-transporting ATP synthase complex, coupling factor F(o)	GO:0000276	0.007528	2.12334	9	1691	7	11201	WBGENE00000206,WBGENE00000209,WBGENE00000230,WBGENE00007385,WBGENE00011015,WBGENE00020275,WBGENE00022336
GO:CC	organelle outer membrane	GO:0031968	0.00793	2.10071	27	1691	13	11201	WBGENE00001424,WBGENE00001509,WBGENE00001662,WBGENE00007686,WBGENE00009313,WBGENE00010583,WBGENE00011088,WBGENE00012907,WBGENE00019900,WBGENE00021093,WBGENE00021133,WBGENE00044026,WBGENE00077771
GO:CC	outer membrane	GO:0019867	0.00793	2.10071	27	1691	13	11201	WBGENE00001424,WBGENE00001509,WBGENE00001662,WBGENE00007686,WBGENE00009313,WBGENE00010583,WBGENE00011088,WBGENE00012907,WBGENE00019900,WBGENE00021093,WBGENE00021133,WBGENE00044026,WBGENE00077771
GO:CC	transport vesicle membrane	GO:0030658	0.008627	2.06416	38	1691	16	11201	WBGENE00000158,WBGENE00003806,WBGENE00004754,WBGENE00004755,WBGENE00004756,WBGENE00010713,WBGENE00010755,WBGENE00011218,WBGENE00011338,WBGENE00011867,WBGENE00013985,WBGENE00017063,WBGENE00019757,WBGENE00020246,WBGENE00021561,WBGENE00022678
GO:CC	intrinsic component of endoplasmic reticulum membrane	GO:0031227	0.00902	2.04478	62	1691	22	11201	WBGENE00001239,WBGENE00001245,WBGENE00001246,WBGENE00007683,WBGENE00007696,WBGENE00007979,WBGENE00008918,WBGENE00009045,WBGENE00010496,WBGENE00011529,WBGENE00011914,WBGENE00013740,WBGENE00016395,WBGENE00016439,WBGENE00017999,WBGENE00018006,WBGENE00018827,WBGENE00018847,WBGENE00019209,WBGENE00021840,WBGENE00021973,WBGENE00022776
GO:CC	mitochondrial outer membrane	GO:0005741	0.009699	2.01327	24	1691	12	11201	WBGENE00001424,WBGENE00001509,WBGENE00001662,WBGENE00007686,WBGENE00009313,WBGENE00010583,WBGENE00011088,WBGENE00012907,WBGENE00019900,WBGENE00021133,WBGENE00044026,WBGENE00077771
GO:CC	kinetochore	GO:0000776	0.009938	2.00268	31	1691	14	11201	WBGENE00001830,WBGENE00001869,WBGENE00002219,WBGENE00003576,WBGENE00006381,WBGENE00006994,WBGENE00012156,WBGENE00012191,WBGENE00015515,WBGENE00016387,WBGENE00017643,WBGENE00017832,WBGENE00020392,WBGENE00021648
GO:CC	oligosaccharyltransferase complex	GO:0008250	0.01223	1.91257	5	1691	5	11201	WBGENE00000896,WBGENE00019693,WBGENE00020683,WBGENE00021960,WBGENE00022793
GO:CC	ER to Golgi transport vesicle membrane	GO:0012507	0.01317	1.8804	15	1691	9	11201	WBGENE00003806,WBGENE00004754,WBGENE00004755,WBGENE00004756,WBGENE00010713,WBGENE00011338,WBGENE00013985,WBGENE00019757,WBGENE00022678
GO:CC	condensed chromosome, centromeric region	GO:0000779	0.015228	1.81735	32	1691	14	11201	WBGENE00001830,WBGENE00001869,WBGENE00002219,WBGENE00003576,WBGENE00006381,WBGENE00006994,WBGENE00012156,WBGENE00012191,WBGENE00015515,WBGENE00016387,WBGENE00017643,WBGENE00017832,WBGENE00020392,WBGENE00021648
GO:CC	vesicle membrane	GO:0012506	0.016468	1.78336	167	1691	44	11201	WBGENE00000101,WBGENE00000158,WBGENE00000184,WBGENE00003806,WBGENE00004101,WBGENE00004271,WBGENE00004272,WBGENE00004274,WBGENE00004373,WBGENE00004754,WBGENE00004755,WBGENE00004756,WBGENE00006594,WBGENE00007390,WBGENE00007979,WBGENE00008498,WBGENE00008919,WBGENE00010713,WBGENE00010755,WBGENE00011218,WBGENE00011338,WBGENE00011775,WBGENE00011867,WBGENE00011972,WBGENE00012712,WBGENE00013034,WBGENE000…
GO:CC	cytoplasmic vesicle membrane	GO:0030659	0.016468	1.78336	167	1691	44	11201	WBGENE00000101,WBGENE00000158,WBGENE00000184,WBGENE00003806,WBGENE00004101,WBGENE00004271,WBGENE00004272,WBGENE00004274,WBGENE00004373,WBGENE00004754,WBGENE00004755,WBGENE00004756,WBGENE00006594,WBGENE00007390,WBGENE00007979,WBGENE00008498,WBGENE00008919,WBGENE00010713,WBGENE00010755,WBGENE00011218,WBGENE00011338,WBGENE00011775,WBGENE00011867,WBGENE00011972,WBGENE00012712,WBGENE00013034,WBGENE000…
GO:CC	microtubule cytoskeleton	GO:0015630	0.028449	1.54594	191	1691	48	11201	WBGENE00000248,WBGENE00000257,WBGENE00000875,WBGENE00000962,WBGENE00001005,WBGENE00001007,WBGENE00002214,WBGENE00002219,WBGENE00003777,WBGENE00004274,WBGENE00004855,WBGENE00004888,WBGENE00004952,WBGENE00004953,WBGENE00004955,WBGENE00006381,WBGENE00006528,WBGENE00006536,WBGENE00006537,WBGENE00006540,WBGENE00006595,WBGENE00006795,WBGENE00006974,WBGENE00006994,WBGENE00007190,WBGENE00008166,WBGENE000…
GO:CC	proton-transporting V-type ATPase, V1 domain	GO:0033180	0.039138	1.4074	8	1691	6	11201	WBGENE00004959,WBGENE00006918,WBGENE00006920,WBGENE00013025,WBGENE00018698,WBGENE00021952
GO:CC	proton-transporting ATP synthase complex, catalytic core F(1)	GO:0045261	0.039138	1.4074	8	1691	6	11201	WBGENE00000229,WBGENE00000230,WBGENE00010419,WBGENE00017982,WBGENE00019061,WBGENE00022089
GO:CC	respiratory chain complex III	GO:0045275	0.039138	1.4074	8	1691	6	11201	WBGENE00000869,WBGENE00002162,WBGENE00009739,WBGENE00015755,WBGENE00019007,WBGENE00020181
GO:CC	mitochondrial respiratory chain complex III	GO:0005750	0.039138	1.4074	8	1691	6	11201	WBGENE00000869,WBGENE00002162,WBGENE00009739,WBGENE00015755,WBGENE00019007,WBGENE00020181
KEGG	Oxidative phosphorylation	KEGG:00190	4.37e-26	25.3596	95	614	65	3369	WBGENE00000206,WBGENE00000209,WBGENE00000229,WBGENE00000230,WBGENE00000869,WBGENE00002162,WBGENE00003061,WBGENE00003225,WBGENE00003831,WBGENE00004959,WBGENE00006433,WBGENE00006519,WBGENE00006768,WBGENE00006911,WBGENE00006917,WBGENE00006918,WBGENE00006919,WBGENE00006920,WBGENE00007548,WBGENE00007880,WBGENE00008149,WBGENE00008414,WBGENE00009051,WBGENE00009161,WBGENE00009353,WBGENE00009712,WBGENE000…
KEGG	Protein processing in endoplasmic reticulum	KEGG:04141	2.4e-22	21.6196	130	614	74	3369	WBGENE00000236,WBGENE00000500,WBGENE00000567,WBGENE00000802,WBGENE00000836,WBGENE00000843,WBGENE00000896,WBGENE00000915,WBGENE00001019,WBGENE00001030,WBGENE00001037,WBGENE00001038,WBGENE00001046,WBGENE00001047,WBGENE00001303,WBGENE00001334,WBGENE00002005,WBGENE00002007,WBGENE00002008,WBGENE00002147,WBGENE00002344,WBGENE00003806,WBGENE00003962,WBGENE00003964,WBGENE00004320,WBGENE00004754,WBGENE000…
KEGG	Metabolic pathways	KEGG:01100	1.43e-12	11.8447	900	614	241	3369	WBGENE00000041,WBGENE00000114,WBGENE00000117,WBGENE00000198,WBGENE00000206,WBGENE00000209,WBGENE00000229,WBGENE00000230,WBGENE00000266,WBGENE00000269,WBGENE00000536,WBGENE00000833,WBGENE00000869,WBGENE00000896,WBGENE00000976,WBGENE00001155,WBGENE00001239,WBGENE00001241,WBGENE00001242,WBGENE00001503,WBGENE00001505,WBGENE00001538,WBGENE00001603,WBGENE00001628,WBGENE00001632,WBGENE00001635,WBGENE000…
KEGG	Proteasome	KEGG:03050	3.02e-10	9.51976	40	614	27	3369	WBGENE00003922,WBGENE00003925,WBGENE00003926,WBGENE00003927,WBGENE00003928,WBGENE00003947,WBGENE00003948,WBGENE00003951,WBGENE00003952,WBGENE00003953,WBGENE00004458,WBGENE00004460,WBGENE00004461,WBGENE00004463,WBGENE00004464,WBGENE00004465,WBGENE00004466,WBGENE00004468,WBGENE00004501,WBGENE00004502,WBGENE00004503,WBGENE00004504,WBGENE00004505,WBGENE00004506,WBGENE00012115,WBGENE00015688,WBGENE000…
KEGG	Citrate cycle (TCA cycle)	KEGG:00020	1.56e-07	6.80623	32	614	21	3369	WBGENE00000041,WBGENE00000833,WBGENE00001503,WBGENE00003162,WBGENE00003225,WBGENE00006433,WBGENE00007824,WBGENE00009082,WBGENE00009353,WBGENE00009440,WBGENE00009664,WBGENE00010317,WBGENE00010794,WBGENE00011232,WBGENE00011510,WBGENE00016392,WBGENE00016844,WBGENE00017759,WBGENE00018491,WBGENE00020679,WBGENE00020950
KEGG	Carbon metabolism	KEGG:01200	2.42e-07	6.61685	104	614	44	3369	WBGENE00000041,WBGENE00000114,WBGENE00000833,WBGENE00001155,WBGENE00001503,WBGENE00001683,WBGENE00001686,WBGENE00003162,WBGENE00003214,WBGENE00003225,WBGENE00006433,WBGENE00006601,WBGENE00007108,WBGENE00007824,WBGENE00007969,WBGENE00008230,WBGENE00008506,WBGENE00008780,WBGENE00009082,WBGENE00009126,WBGENE00009353,WBGENE00009440,WBGENE00009664,WBGENE00009918,WBGENE00010317,WBGENE00010794,WBGENE000…
KEGG	Phagosome	KEGG:04145	3.91e-07	6.40775	62	614	31	3369	WBGENE00000063,WBGENE00000064,WBGENE00000065,WBGENE00000248,WBGENE00000567,WBGENE00000802,WBGENE00000962,WBGENE00001007,WBGENE00001303,WBGENE00004101,WBGENE00004271,WBGENE00004959,WBGENE00006528,WBGENE00006536,WBGENE00006537,WBGENE00006768,WBGENE00006911,WBGENE00006917,WBGENE00006918,WBGENE00006919,WBGENE00006920,WBGENE00009882,WBGENE00010130,WBGENE00013025,WBGENE00013311,WBGENE00015927,WBGENE000…
KEGG	Protein export	KEGG:03060	5.28e-06	5.27738	21	614	15	3369	WBGENE00001047,WBGENE00001303,WBGENE00002007,WBGENE00002008,WBGENE00007683,WBGENE00009012,WBGENE00009521,WBGENE00010097,WBGENE00011306,WBGENE00012550,WBGENE00013311,WBGENE00016395,WBGENE00017799,WBGENE00021427,WBGENE00021844
KEGG	Ribosome	KEGG:03010	8.14e-06	5.08949	126	614	47	3369	WBGENE00004408,WBGENE00004409,WBGENE00004410,WBGENE00004415,WBGENE00004416,WBGENE00004418,WBGENE00004419,WBGENE00004420,WBGENE00004422,WBGENE00004424,WBGENE00004426,WBGENE00004428,WBGENE00004431,WBGENE00004433,WBGENE00004439,WBGENE00004442,WBGENE00004445,WBGENE00004447,WBGENE00004448,WBGENE00004449,WBGENE00004452,WBGENE00004453,WBGENE00004456,WBGENE00004470,WBGENE00004471,WBGENE00004472,WBGENE000…
KEGG	Biosynthesis of amino acids	KEGG:01230	0.0013	2.88595	69	614	27	3369	WBGENE00000041,WBGENE00000833,WBGENE00001603,WBGENE00001683,WBGENE00001686,WBGENE00003214,WBGENE00006416,WBGENE00006601,WBGENE00008230,WBGENE00008506,WBGENE00009126,WBGENE00009440,WBGENE00009664,WBGENE00010317,WBGENE00011884,WBGENE00012855,WBGENE00015538,WBGENE00015540,WBGENE00016333,WBGENE00017166,WBGENE00018783,WBGENE00019001,WBGENE00019096,WBGENE00020107,WBGENE00020185,WBGENE00021787,WBGENE000…
KEGG	Various types of N-glycan biosynthesis	KEGG:00513	0.002711	2.56688	33	614	16	3369	WBGENE00000269,WBGENE00000896,WBGENE00001505,WBGENE00001639,WBGENE00001645,WBGENE00008258,WBGENE00008411,WBGENE00010284,WBGENE00011638,WBGENE00013881,WBGENE00019693,WBGENE00019725,WBGENE00020437,WBGENE00020683,WBGENE00021766,WBGENE00022793
KEGG	Ubiquitin mediated proteolysis	KEGG:04120	0.003761	2.42468	88	614	31	3369	WBGENE00000500,WBGENE00000836,WBGENE00000837,WBGENE00000838,WBGENE00001574,WBGENE00002344,WBGENE00003009,WBGENE00003132,WBGENE00004320,WBGENE00004767,WBGENE00004768,WBGENE00004807,WBGENE00004808,WBGENE00006699,WBGENE00006702,WBGENE00006703,WBGENE00006704,WBGENE00006707,WBGENE00006713,WBGENE00006715,WBGENE00006719,WBGENE00006720,WBGENE00006727,WBGENE00006728,WBGENE00006734,WBGENE00007009,WBGENE000…
KEGG	mRNA surveillance pathway	KEGG:03015	0.00704	2.15244	75	614	27	3369	WBGENE00000122,WBGENE00001747,WBGENE00001840,WBGENE00002363,WBGENE00003123,WBGENE00003901,WBGENE00003902,WBGENE00004706,WBGENE00004879,WBGENE00006352,WBGENE00007554,WBGENE00007625,WBGENE00007710,WBGENE00010405,WBGENE00011808,WBGENE00012528,WBGENE00015329,WBGENE00015661,WBGENE00016374,WBGENE00016398,WBGENE00016601,WBGENE00017988,WBGENE00018156,WBGENE00020092,WBGENE00020187,WBGENE00020269,WBGENE000…
KEGG	N-Glycan biosynthesis	KEGG:00510	0.020848	1.68093	38	614	16	3369	WBGENE00000269,WBGENE00000896,WBGENE00001639,WBGENE00001645,WBGENE00007102,WBGENE00008258,WBGENE00008411,WBGENE00009583,WBGENE00010284,WBGENE00011638,WBGENE00013881,WBGENE00019693,WBGENE00019725,WBGENE00020437,WBGENE00020683,WBGENE00022793
KEGG	Glycolysis / Gluconeogenesis	KEGG:00010	0.024348	1.61353	42	614	17	3369	WBGENE00000117,WBGENE00001683,WBGENE00001686,WBGENE00006601,WBGENE00007824,WBGENE00007969,WBGENE00008230,WBGENE00008780,WBGENE00009082,WBGENE00009126,WBGENE00010794,WBGENE00011232,WBGENE00011510,WBGENE00011884,WBGENE00017166,WBGENE00019001,WBGENE00020185
KEGG	Valine, leucine and isoleucine degradation	KEGG:00280	0.039889	1.39915	51	614	19	3369	WBGENE00000114,WBGENE00000117,WBGENE00001155,WBGENE00006518,WBGENE00009319,WBGENE00010035,WBGENE00010794,WBGENE00012713,WBGENE00012855,WBGENE00014054,WBGENE00015125,WBGENE00015326,WBGENE00016943,WBGENE00019406,WBGENE00019433,WBGENE00019978,WBGENE00020347,WBGENE00020382,WBGENE00020419
WP	Cell division: first embryonic mitosis	WP:WP1411	1.37e-08	7.86278	117	292	61	1077	WBGENE00000099,WBGENE00000248,WBGENE00000249,WBGENE00000275,WBGENE00000293,WBGENE00000549,WBGENE00000804,WBGENE00000838,WBGENE00000875,WBGENE00000962,WBGENE00001005,WBGENE00001007,WBGENE00001830,WBGENE00001831,WBGENE00001869,WBGENE00002219,WBGENE00002231,WBGENE00002297,WBGENE00002363,WBGENE00002694,WBGENE00002879,WBGENE00003052,WBGENE00003150,WBGENE00003196,WBGENE00003367,WBGENE00003372,WBGENE000…
WP	Proteasome degradation	WP:WP470	2.32e-08	7.63458	36	292	27	1077	WBGENE00002344,WBGENE00003922,WBGENE00003925,WBGENE00003926,WBGENE00003927,WBGENE00003928,WBGENE00003947,WBGENE00003951,WBGENE00003952,WBGENE00004458,WBGENE00004460,WBGENE00004461,WBGENE00004463,WBGENE00004464,WBGENE00004465,WBGENE00004466,WBGENE00004468,WBGENE00004501,WBGENE00004502,WBGENE00004503,WBGENE00004504,WBGENE00004505,WBGENE00004506,WBGENE00006699,WBGENE00006727,WBGENE00019693,WBGENE000…
WP	Cytoplasmic ribosomal proteins	WP:WP540	4.24e-06	5.37303	61	292	35	1077	WBGENE00004408,WBGENE00004409,WBGENE00004415,WBGENE00004416,WBGENE00004419,WBGENE00004420,WBGENE00004422,WBGENE00004426,WBGENE00004428,WBGENE00004430,WBGENE00004441,WBGENE00004445,WBGENE00004447,WBGENE00004448,WBGENE00004449,WBGENE00004452,WBGENE00004456,WBGENE00004470,WBGENE00004471,WBGENE00004472,WBGENE00004473,WBGENE00004474,WBGENE00004475,WBGENE00004477,WBGENE00004480,WBGENE00004484,WBGENE000…
WP	Translation factors	WP:WP110	0.000415	3.38184	30	292	19	1077	WBGENE00001167,WBGENE00001168,WBGENE00001209,WBGENE00001225,WBGENE00001227,WBGENE00001229,WBGENE00001230,WBGENE00002061,WBGENE00002064,WBGENE00002083,WBGENE00003902,WBGENE00008670,WBGENE00010560,WBGENE00012768,WBGENE00016496,WBGENE00018846,WBGENE00019162,WBGENE00020269,WBGENE00021351
WP	Mitochondrial unfolded-protein response	WP:WP525	0.00639	2.19453	256	292	91	1077	WBGENE00000770,WBGENE00000771,WBGENE00001094,WBGENE00001167,WBGENE00001168,WBGENE00001209,WBGENE00001225,WBGENE00001227,WBGENE00001229,WBGENE00001230,WBGENE00001233,WBGENE00001747,WBGENE00002010,WBGENE00002059,WBGENE00002061,WBGENE00002064,WBGENE00002083,WBGENE00002238,WBGENE00003815,WBGENE00004409,WBGENE00004415,WBGENE00004416,WBGENE00004420,WBGENE00004422,WBGENE00004424,WBGENE00004426,WBGENE000…
WP	Fatty acid beta-oxidation 1	WP:WP126	0.028115	1.55107	20	292	12	1077	WBGENE00001155,WBGENE00006601,WBGENE00007969,WBGENE00010035,WBGENE00012031,WBGENE00012907,WBGENE00015125,WBGENE00017125,WBGENE00018152,WBGENE00020007,WBGENE00020347,WBGENE00022037
TF	Factor: ceh-48; motif: NNYCRATAN; match class: 1	TF:M08052_1	3.97e-22	21.4017	5887	2627	1045	18840	WBGENE00000063,WBGENE00000064,WBGENE00000065,WBGENE00000097,WBGENE00000102,WBGENE00000158,WBGENE00000182,WBGENE00000184,WBGENE00000206,WBGENE00000230,WBGENE00000231,WBGENE00000248,WBGENE00000249,WBGENE00000254,WBGENE00000263,WBGENE00000269,WBGENE00000376,WBGENE00000390,WBGENE00000407,WBGENE00000410,WBGENE00000418,WBGENE00000475,WBGENE00000500,WBGENE00000507,WBGENE00000508,WBGENE00000517,WBGENE000…
TF	Factor: hlh-30; motif: NRTCACGTGAYN; match class: 1	TF:M12393_1	5.42e-16	15.2657	376	2627	116	18840	WBGENE00000263,WBGENE00000837,WBGENE00000865,WBGENE00001194,WBGENE00001414,WBGENE00001571,WBGENE00002066,WBGENE00003901,WBGENE00004205,WBGENE00004430,WBGENE00004497,WBGENE00004855,WBGENE00004952,WBGENE00004962,WBGENE00004966,WBGENE00006594,WBGENE00006625,WBGENE00006697,WBGENE00006734,WBGENE00007169,WBGENE00007337,WBGENE00007385,WBGENE00007386,WBGENE00007390,WBGENE00007554,WBGENE00007570,WBGENE000…
TF	Factor: hlh-30; motif: NRTCACGTGAYN	TF:M12393	5.42e-16	15.2657	376	2627	116	18840	WBGENE00000263,WBGENE00000837,WBGENE00000865,WBGENE00001194,WBGENE00001414,WBGENE00001571,WBGENE00002066,WBGENE00003901,WBGENE00004205,WBGENE00004430,WBGENE00004497,WBGENE00004855,WBGENE00004952,WBGENE00004962,WBGENE00004966,WBGENE00006594,WBGENE00006625,WBGENE00006697,WBGENE00006734,WBGENE00007169,WBGENE00007337,WBGENE00007385,WBGENE00007386,WBGENE00007390,WBGENE00007554,WBGENE00007570,WBGENE000…
TF	Factor: ceh-48; motif: NNYCRATAN	TF:M08052	1.21e-14	13.9174	12308	2627	1897	18840	WBGENE00000007,WBGENE00000019,WBGENE00000023,WBGENE00000063,WBGENE00000064,WBGENE00000065,WBGENE00000097,WBGENE00000101,WBGENE00000102,WBGENE00000117,WBGENE00000150,WBGENE00000155,WBGENE00000158,WBGENE00000160,WBGENE00000169,WBGENE00000182,WBGENE00000183,WBGENE00000184,WBGENE00000187,WBGENE00000198,WBGENE00000206,WBGENE00000209,WBGENE00000226,WBGENE00000229,WBGENE00000230,WBGENE00000231,WBGENE000…
TF	Factor: hlh-30; motif: NNNATCACGTGAYNNNN	TF:M03123	6.08e-08	7.21624	240	2627	69	18840	WBGENE00000263,WBGENE00000837,WBGENE00000865,WBGENE00001194,WBGENE00001414,WBGENE00003901,WBGENE00004205,WBGENE00004497,WBGENE00004952,WBGENE00004962,WBGENE00004966,WBGENE00006594,WBGENE00006625,WBGENE00006734,WBGENE00007169,WBGENE00007337,WBGENE00007385,WBGENE00007386,WBGENE00007390,WBGENE00007579,WBGENE00007735,WBGENE00008224,WBGENE00008530,WBGENE00008581,WBGENE00009012,WBGENE00009075,WBGENE000…
TF	Factor: hlh-30; motif: NNNATCACGTGAYNNNN; match class: 1	TF:M03123_1	3.1e-05	4.50928	160	2627	46	18840	WBGENE00000837,WBGENE00003901,WBGENE00004205,WBGENE00004952,WBGENE00004962,WBGENE00004966,WBGENE00006625,WBGENE00006734,WBGENE00007169,WBGENE00007337,WBGENE00007385,WBGENE00007386,WBGENE00007390,WBGENE00007735,WBGENE00008224,WBGENE00008530,WBGENE00009012,WBGENE00010046,WBGENE00010544,WBGENE00010547,WBGENE00010665,WBGENE00011953,WBGENE00012401,WBGENE00012402,WBGENE00012689,WBGENE00013192,WBGENE000…
TF	Factor: ceh-28; motif: WWATCGATWW	TF:M12390	0.00043	3.36605	474	2627	100	18840	WBGENE00000158,WBGENE00000184,WBGENE00000269,WBGENE00000500,WBGENE00000838,WBGENE00001030,WBGENE00001334,WBGENE00001414,WBGENE00001579,WBGENE00001869,WBGENE00002250,WBGENE00003587,WBGENE00003589,WBGENE00004014,WBGENE00004086,WBGENE00004433,WBGENE00004466,WBGENE00004702,WBGENE00004963,WBGENE00004971,WBGENE00005012,WBGENE00006381,WBGENE00006689,WBGENE00006730,WBGENE00006840,WBGENE00006959,WBGENE000…
TF	Factor: cebp-1; motif: ATTTCGTAATAN	TF:M12389	0.000668	3.17505	3180	2627	519	18840	WBGENE00000063,WBGENE00000064,WBGENE00000065,WBGENE00000117,WBGENE00000160,WBGENE00000182,WBGENE00000209,WBGENE00000248,WBGENE00000249,WBGENE00000263,WBGENE00000266,WBGENE00000268,WBGENE00000275,WBGENE00000390,WBGENE00000405,WBGENE00000407,WBGENE00000410,WBGENE00000475,WBGENE00000500,WBGENE00000507,WBGENE00000508,WBGENE00000549,WBGENE00000552,WBGENE00000804,WBGENE00000838,WBGENE00000885,WBGENE000…
TF	Factor: cebp-1; motif: ATTTCGTAATAN; match class: 1	TF:M12389_1	0.002347	2.62957	644	2627	125	18840	WBGENE00000063,WBGENE00000064,WBGENE00000160,WBGENE00000275,WBGENE00000390,WBGENE00000410,WBGENE00000475,WBGENE00000507,WBGENE00000508,WBGENE00000552,WBGENE00000915,WBGENE00000962,WBGENE00001194,WBGENE00001414,WBGENE00001443,WBGENE00002005,WBGENE00002066,WBGENE00002083,WBGENE00002263,WBGENE00003041,WBGENE00003052,WBGENE00003389,WBGENE00003793,WBGENE00003805,WBGENE00003926,WBGENE00003927,WBGENE000…
TF	Factor: nhr-6; motif: AAAKGTCA	TF:M12395	0.028698	1.54215	727	2627	132	18840	WBGENE00000160,WBGENE00000472,WBGENE00000836,WBGENE00001502,WBGENE00002206,WBGENE00002845,WBGENE00003449,WBGENE00003562,WBGENE00004086,WBGENE00004485,WBGENE00004736,WBGENE00006052,WBGENE00006416,WBGENE00006460,WBGENE00006808,WBGENE00006999,WBGENE00007019,WBGENE00007307,WBGENE00007538,WBGENE00007549,WBGENE00007572,WBGENE00007732,WBGENE00007733,WBGENE00007763,WBGENE00007927,WBGENE00008262,WBGENE000…
TF	Factor: blmp-1; motif: RAAAGNGARAR	TF:M07150	0.03166	1.49948	1420	2627	239	18840	WBGENE00000102,WBGENE00000160,WBGENE00000183,WBGENE00000248,WBGENE00000257,WBGENE00000266,WBGENE00000379,WBGENE00000410,WBGENE00000770,WBGENE00000837,WBGENE00001034,WBGENE00001153,WBGENE00001229,WBGENE00001239,WBGENE00001424,WBGENE00001584,WBGENE00001597,WBGENE00001632,WBGENE00001645,WBGENE00001678,WBGENE00001683,WBGENE00002061,WBGENE00002143,WBGENE00002231,WBGENE00002238,WBGENE00003034,WBGENE000…
HP	Progressive cerebellar ataxia	HP:0002073	3.52e-17	16.4532	156	533	76	3056	WBGENE00000231,WBGENE00001155,WBGENE00001167,WBGENE00001194,WBGENE00001596,WBGENE00003061,WBGENE00003831,WBGENE00004063,WBGENE00006352,WBGENE00007049,WBGENE00007269,WBGENE00007305,WBGENE00007335,WBGENE00007448,WBGENE00007630,WBGENE00007777,WBGENE00007791,WBGENE00008053,WBGENE00008423,WBGENE00008662,WBGENE00009271,WBGENE00009402,WBGENE00009992,WBGENE00010719,WBGENE00010874,WBGENE00011510,WBGENE000…
HP	Jerky ocular pursuit movements	HP:0008003	3.55e-14	13.4497	68	533	43	3056	WBGENE00007049,WBGENE00007269,WBGENE00007305,WBGENE00007335,WBGENE00007448,WBGENE00007777,WBGENE00007791,WBGENE00008423,WBGENE00008662,WBGENE00009402,WBGENE00010719,WBGENE00010874,WBGENE00012169,WBGENE00012637,WBGENE00013978,WBGENE00014007,WBGENE00016388,WBGENE00016541,WBGENE00016765,WBGENE00016946,WBGENE00016963,WBGENE00017050,WBGENE00017803,WBGENE00018004,WBGENE00018122,WBGENE00018123,WBGENE000…
HP	Vertical nystagmus	HP:0010544	6.61e-14	13.1798	77	533	46	3056	WBGENE00004063,WBGENE00007049,WBGENE00007269,WBGENE00007305,WBGENE00007335,WBGENE00007448,WBGENE00007777,WBGENE00007791,WBGENE00008423,WBGENE00008662,WBGENE00009402,WBGENE00010719,WBGENE00010874,WBGENE00011240,WBGENE00012169,WBGENE00012637,WBGENE00013978,WBGENE00014007,WBGENE00016388,WBGENE00016541,WBGENE00016765,WBGENE00016946,WBGENE00016963,WBGENE00017050,WBGENE00017803,WBGENE00018004,WBGENE000…
HP	Congenital contracture	HP:0002803	2.72e-13	12.5648	247	533	95	3056	WBGENE00001405,WBGENE00003060,WBGENE00004899,WBGENE00004975,WBGENE00005153,WBGENE00006661,WBGENE00007049,WBGENE00007269,WBGENE00007305,WBGENE00007335,WBGENE00007354,WBGENE00007448,WBGENE00007699,WBGENE00007700,WBGENE00007763,WBGENE00007777,WBGENE00007791,WBGENE00007912,WBGENE00008124,WBGENE00008423,WBGENE00008662,WBGENE00008780,WBGENE00009054,WBGENE00009079,WBGENE00009101,WBGENE00009402,WBGENE000…
HP	Hypoplasia of the ventral pons	HP:0006850	3.67e-13	12.4349	71	533	43	3056	WBGENE00007049,WBGENE00007269,WBGENE00007305,WBGENE00007335,WBGENE00007448,WBGENE00007777,WBGENE00007791,WBGENE00008423,WBGENE00008662,WBGENE00009402,WBGENE00010719,WBGENE00010874,WBGENE00012169,WBGENE00012637,WBGENE00013978,WBGENE00014007,WBGENE00016388,WBGENE00016541,WBGENE00016765,WBGENE00016946,WBGENE00016963,WBGENE00017050,WBGENE00017803,WBGENE00018004,WBGENE00018122,WBGENE00018123,WBGENE000…
HP	Basal ganglia gliosis	HP:0006999	4.31e-13	12.3653	74	533	44	3056	WBGENE00007049,WBGENE00007269,WBGENE00007305,WBGENE00007335,WBGENE00007448,WBGENE00007777,WBGENE00007791,WBGENE00008423,WBGENE00008662,WBGENE00009402,WBGENE00010719,WBGENE00010874,WBGENE00011510,WBGENE00012169,WBGENE00012637,WBGENE00013978,WBGENE00014007,WBGENE00016388,WBGENE00016541,WBGENE00016765,WBGENE00016946,WBGENE00016963,WBGENE00017050,WBGENE00017803,WBGENE00018004,WBGENE00018122,WBGENE000…
HP	Neuronal loss in basal ganglia	HP:0200147	1.57e-12	11.8051	73	533	43	3056	WBGENE00007049,WBGENE00007269,WBGENE00007305,WBGENE00007335,WBGENE00007448,WBGENE00007777,WBGENE00007791,WBGENE00008423,WBGENE00008662,WBGENE00009402,WBGENE00010719,WBGENE00010874,WBGENE00012169,WBGENE00012637,WBGENE00013978,WBGENE00014007,WBGENE00016388,WBGENE00016541,WBGENE00016765,WBGENE00016946,WBGENE00016963,WBGENE00017050,WBGENE00017803,WBGENE00018004,WBGENE00018122,WBGENE00018123,WBGENE000…
HP	Spinal muscular atrophy	HP:0007269	9.4e-12	11.0268	103	533	52	3056	WBGENE00000962,WBGENE00001019,WBGENE00004063,WBGENE00006661,WBGENE00007049,WBGENE00007269,WBGENE00007305,WBGENE00007335,WBGENE00007448,WBGENE00007630,WBGENE00007777,WBGENE00007791,WBGENE00008423,WBGENE00008662,WBGENE00009402,WBGENE00010254,WBGENE00010719,WBGENE00010874,WBGENE00012169,WBGENE00012637,WBGENE00013978,WBGENE00014007,WBGENE00016388,WBGENE00016541,WBGENE00016765,WBGENE00016946,WBGENE000…
HP	Abnormal anterior horn cell morphology	HP:0006802	1.28e-11	10.8918	82	533	45	3056	WBGENE00001016,WBGENE00006565,WBGENE00007049,WBGENE00007269,WBGENE00007305,WBGENE00007335,WBGENE00007448,WBGENE00007777,WBGENE00007791,WBGENE00008423,WBGENE00008662,WBGENE00009402,WBGENE00010719,WBGENE00010874,WBGENE00012169,WBGENE00012637,WBGENE00013978,WBGENE00014007,WBGENE00016388,WBGENE00016541,WBGENE00016765,WBGENE00016946,WBGENE00016963,WBGENE00017050,WBGENE00017803,WBGENE00018004,WBGENE000…
HP	Degeneration of anterior horn cells	HP:0002398	1.28e-11	10.8918	82	533	45	3056	WBGENE00001016,WBGENE00006565,WBGENE00007049,WBGENE00007269,WBGENE00007305,WBGENE00007335,WBGENE00007448,WBGENE00007777,WBGENE00007791,WBGENE00008423,WBGENE00008662,WBGENE00009402,WBGENE00010719,WBGENE00010874,WBGENE00012169,WBGENE00012637,WBGENE00013978,WBGENE00014007,WBGENE00016388,WBGENE00016541,WBGENE00016765,WBGENE00016946,WBGENE00016963,WBGENE00017050,WBGENE00017803,WBGENE00018004,WBGENE000…
HP	EMG: neuropathic changes	HP:0003445	1.38e-11	10.8604	120	533	57	3056	WBGENE00000962,WBGENE00001371,WBGENE00001509,WBGENE00004063,WBGENE00007049,WBGENE00007269,WBGENE00007305,WBGENE00007335,WBGENE00007448,WBGENE00007630,WBGENE00007777,WBGENE00007791,WBGENE00008053,WBGENE00008423,WBGENE00008662,WBGENE00009002,WBGENE00009402,WBGENE00009563,WBGENE00010254,WBGENE00010719,WBGENE00010874,WBGENE00011240,WBGENE00011629,WBGENE00012169,WBGENE00012543,WBGENE00012637,WBGENE000…
HP	Dystonia	HP:0001332	1.14e-09	8.94262	600	533	167	3056	WBGENE00000063,WBGENE00000064,WBGENE00000065,WBGENE00000114,WBGENE00000198,WBGENE00000231,WBGENE00000500,WBGENE00000800,WBGENE00000962,WBGENE00001016,WBGENE00001020,WBGENE00001026,WBGENE00001029,WBGENE00001046,WBGENE00001155,WBGENE00001194,WBGENE00001333,WBGENE00001488,WBGENE00001491,WBGENE00001678,WBGENE00001973,WBGENE00002196,WBGENE00002238,WBGENE00003061,WBGENE00003162,WBGENE00003562,WBGENE000…
HP	Trigonocephaly	HP:0000243	1.29e-09	8.88828	49	533	31	3056	WBGENE00000063,WBGENE00000064,WBGENE00000065,WBGENE00004208,WBGENE00007354,WBGENE00007699,WBGENE00007700,WBGENE00007763,WBGENE00007824,WBGENE00008124,WBGENE00009054,WBGENE00009079,WBGENE00009101,WBGENE00009893,WBGENE00010265,WBGENE00011133,WBGENE00012008,WBGENE00012741,WBGENE00013476,WBGENE00016010,WBGENE00016081,WBGENE00016200,WBGENE00017699,WBGENE00017817,WBGENE00018359,WBGENE00019951,WBGENE000…
HP	Abnormality of ocular smooth pursuit	HP:0000617	3.23e-09	8.49072	112	533	51	3056	WBGENE00000231,WBGENE00000500,WBGENE00001016,WBGENE00001167,WBGENE00001194,WBGENE00004063,WBGENE00007049,WBGENE00007269,WBGENE00007305,WBGENE00007335,WBGENE00007448,WBGENE00007777,WBGENE00007791,WBGENE00008423,WBGENE00008662,WBGENE00009402,WBGENE00010719,WBGENE00010874,WBGENE00011240,WBGENE00012169,WBGENE00012337,WBGENE00012637,WBGENE00013978,WBGENE00014007,WBGENE00016388,WBGENE00016541,WBGENE000…
HP	Motor neuron atrophy	HP:0007373	1.12e-08	7.95268	129	533	55	3056	WBGENE00000231,WBGENE00000865,WBGENE00001016,WBGENE00006565,WBGENE00007049,WBGENE00007269,WBGENE00007305,WBGENE00007335,WBGENE00007448,WBGENE00007630,WBGENE00007777,WBGENE00007791,WBGENE00007912,WBGENE00008053,WBGENE00008423,WBGENE00008662,WBGENE00009402,WBGENE00009594,WBGENE00010254,WBGENE00010719,WBGENE00010874,WBGENE00012169,WBGENE00012637,WBGENE00013978,WBGENE00014007,WBGENE00016388,WBGENE000…
HP	Gait imbalance	HP:0002141	6.93e-08	7.15911	134	533	55	3056	WBGENE00001016,WBGENE00001020,WBGENE00001026,WBGENE00001029,WBGENE00001046,WBGENE00007049,WBGENE00007269,WBGENE00007305,WBGENE00007335,WBGENE00007448,WBGENE00007777,WBGENE00007791,WBGENE00008053,WBGENE00008423,WBGENE00008662,WBGENE00008780,WBGENE00009402,WBGENE00010719,WBGENE00010874,WBGENE00011629,WBGENE00012169,WBGENE00012637,WBGENE00013978,WBGENE00014007,WBGENE00016020,WBGENE00016200,WBGENE000…
HP	Abnormal motor neuron morphology	HP:0002450	8.68e-08	7.06154	142	533	57	3056	WBGENE00000231,WBGENE00000865,WBGENE00001016,WBGENE00006565,WBGENE00007049,WBGENE00007269,WBGENE00007305,WBGENE00007335,WBGENE00007448,WBGENE00007630,WBGENE00007777,WBGENE00007791,WBGENE00007912,WBGENE00008053,WBGENE00008423,WBGENE00008662,WBGENE00009402,WBGENE00009594,WBGENE00010254,WBGENE00010719,WBGENE00010874,WBGENE00012169,WBGENE00012637,WBGENE00013978,WBGENE00014007,WBGENE00016120,WBGENE000…
HP	Abnormal reflex	HP:0031826	1.68e-07	6.77345	1087	533	255	3056	WBGENE00000019,WBGENE00000020,WBGENE00000023,WBGENE00000041,WBGENE00000231,WBGENE00000500,WBGENE00000800,WBGENE00000962,WBGENE00001016,WBGENE00001019,WBGENE00001020,WBGENE00001026,WBGENE00001029,WBGENE00001046,WBGENE00001094,WBGENE00001155,WBGENE00001167,WBGENE00001194,WBGENE00001371,WBGENE00001443,WBGENE00001502,WBGENE00001509,WBGENE00001558,WBGENE00001579,WBGENE00001596,WBGENE00001639,WBGENE000…
HP	Abnormal neuron morphology	HP:0012757	1.69e-07	6.77267	144	533	57	3056	WBGENE00000231,WBGENE00000865,WBGENE00001016,WBGENE00006565,WBGENE00007049,WBGENE00007269,WBGENE00007305,WBGENE00007335,WBGENE00007448,WBGENE00007630,WBGENE00007777,WBGENE00007791,WBGENE00007912,WBGENE00008053,WBGENE00008423,WBGENE00008662,WBGENE00009402,WBGENE00009594,WBGENE00010254,WBGENE00010719,WBGENE00010874,WBGENE00012169,WBGENE00012637,WBGENE00013978,WBGENE00014007,WBGENE00016120,WBGENE000…
HP	Fasciculations	HP:0002380	3.46e-07	6.46117	150	533	58	3056	WBGENE00000231,WBGENE00000865,WBGENE00003061,WBGENE00004063,WBGENE00005007,WBGENE00006565,WBGENE00006661,WBGENE00007049,WBGENE00007269,WBGENE00007305,WBGENE00007335,WBGENE00007448,WBGENE00007630,WBGENE00007777,WBGENE00007791,WBGENE00008053,WBGENE00008423,WBGENE00008662,WBGENE00009002,WBGENE00009402,WBGENE00010254,WBGENE00010719,WBGENE00010874,WBGENE00012169,WBGENE00012637,WBGENE00013978,WBGENE000…
HP	EEG with multifocal slow activity	HP:0010844	5.88e-07	6.23051	61	533	32	3056	WBGENE00001502,WBGENE00001579,WBGENE00003920,WBGENE00007354,WBGENE00007699,WBGENE00007700,WBGENE00007763,WBGENE00008124,WBGENE00009054,WBGENE00009079,WBGENE00009101,WBGENE00009505,WBGENE00009893,WBGENE00010265,WBGENE00011040,WBGENE00011133,WBGENE00011867,WBGENE00012008,WBGENE00012741,WBGENE00013025,WBGENE00013476,WBGENE00016010,WBGENE00016081,WBGENE00017817,WBGENE00018359,WBGENE00019951,WBGENE000…
HP	Feeding difficulties	HP:0011968	7.86e-07	6.10448	924	533	222	3056	WBGENE00000063,WBGENE00000064,WBGENE00000065,WBGENE00000114,WBGENE00000198,WBGENE00000259,WBGENE00000275,WBGENE00000536,WBGENE00000800,WBGENE00000838,WBGENE00000938,WBGENE00000962,WBGENE00001047,WBGENE00001194,WBGENE00001333,WBGENE00001443,WBGENE00001488,WBGENE00001491,WBGENE00001502,WBGENE00001579,WBGENE00001645,WBGENE00001747,WBGENE00001973,WBGENE00002064,WBGENE00002162,WBGENE00002191,WBGENE000…
HP	Peripheral neuropathy	HP:0009830	2.67e-06	5.57365	491	533	134	3056	WBGENE00000019,WBGENE00000020,WBGENE00000023,WBGENE00000041,WBGENE00000160,WBGENE00000536,WBGENE00000962,WBGENE00001016,WBGENE00001020,WBGENE00001026,WBGENE00001029,WBGENE00001046,WBGENE00001155,WBGENE00001371,WBGENE00001443,WBGENE00001509,WBGENE00001678,WBGENE00002238,WBGENE00003061,WBGENE00003214,WBGENE00003815,WBGENE00003831,WBGENE00004063,WBGENE00004505,WBGENE00004737,WBGENE00004899,WBGENE000…
HP	Limb hypertonia	HP:0002509	3.19e-06	5.49624	142	533	54	3056	WBGENE00001020,WBGENE00001026,WBGENE00001029,WBGENE00001046,WBGENE00001502,WBGENE00001579,WBGENE00001596,WBGENE00001973,WBGENE00003920,WBGENE00004189,WBGENE00007333,WBGENE00007354,WBGENE00007699,WBGENE00007700,WBGENE00007763,WBGENE00008124,WBGENE00008237,WBGENE00008555,WBGENE00008780,WBGENE00009054,WBGENE00009079,WBGENE00009101,WBGENE00009353,WBGENE00009505,WBGENE00009893,WBGENE00010265,WBGENE000…
HP	Hypoplasia of the pons	HP:0012110	4.09e-06	5.38858	139	533	53	3056	WBGENE00000231,WBGENE00000500,WBGENE00001194,WBGENE00001639,WBGENE00004208,WBGENE00007049,WBGENE00007269,WBGENE00007305,WBGENE00007335,WBGENE00007448,WBGENE00007777,WBGENE00007791,WBGENE00008423,WBGENE00008662,WBGENE00009402,WBGENE00010167,WBGENE00010719,WBGENE00010874,WBGENE00012169,WBGENE00012637,WBGENE00013978,WBGENE00014007,WBGENE00016388,WBGENE00016541,WBGENE00016583,WBGENE00016765,WBGENE000…
HP	Feeding difficulties in infancy	HP:0008872	4.81e-06	5.31774	587	533	153	3056	WBGENE00000259,WBGENE00000275,WBGENE00000800,WBGENE00000962,WBGENE00001047,WBGENE00001194,WBGENE00001333,WBGENE00001443,WBGENE00001488,WBGENE00001491,WBGENE00001645,WBGENE00001747,WBGENE00001973,WBGENE00002064,WBGENE00002162,WBGENE00002196,WBGENE00002717,WBGENE00003061,WBGENE00004046,WBGENE00004063,WBGENE00004201,WBGENE00004208,WBGENE00004737,WBGENE00004899,WBGENE00004959,WBGENE00005007,WBGENE000…
HP	Poor head control	HP:0002421	7.89e-06	5.10296	197	533	67	3056	WBGENE00001502,WBGENE00001579,WBGENE00003061,WBGENE00003162,WBGENE00003831,WBGENE00003920,WBGENE00004899,WBGENE00005153,WBGENE00007354,WBGENE00007699,WBGENE00007700,WBGENE00007763,WBGENE00008124,WBGENE00009051,WBGENE00009054,WBGENE00009079,WBGENE00009101,WBGENE00009353,WBGENE00009505,WBGENE00009893,WBGENE00009992,WBGENE00010265,WBGENE00010326,WBGENE00011040,WBGENE00011133,WBGENE00011867,WBGENE000…
HP	Atrophy/Degeneration affecting the central nervous system	HP:0007367	2.13e-05	4.67185	916	533	215	3056	WBGENE00000019,WBGENE00000020,WBGENE00000023,WBGENE00000041,WBGENE00000063,WBGENE00000064,WBGENE00000065,WBGENE00000198,WBGENE00000231,WBGENE00000500,WBGENE00000585,WBGENE00000800,WBGENE00000865,WBGENE00000962,WBGENE00001016,WBGENE00001020,WBGENE00001026,WBGENE00001029,WBGENE00001046,WBGENE00001194,WBGENE00001333,WBGENE00001488,WBGENE00001491,WBGENE00001502,WBGENE00001503,WBGENE00001579,WBGENE000…
HP	Horizontal nystagmus	HP:0000666	3.62e-05	4.44098	131	533	49	3056	WBGENE00000500,WBGENE00001056,WBGENE00004063,WBGENE00007049,WBGENE00007269,WBGENE00007305,WBGENE00007335,WBGENE00007448,WBGENE00007777,WBGENE00007791,WBGENE00008423,WBGENE00008662,WBGENE00008685,WBGENE00009402,WBGENE00010167,WBGENE00010719,WBGENE00010874,WBGENE00012169,WBGENE00012386,WBGENE00012637,WBGENE00013978,WBGENE00014007,WBGENE00016388,WBGENE00016541,WBGENE00016765,WBGENE00016946,WBGENE000…
HP	Normochromic anemia	HP:0001895	4.94e-05	4.30653	25	533	17	3056	WBGENE00002162,WBGENE00004416,WBGENE00004422,WBGENE00004430,WBGENE00004441,WBGENE00004445,WBGENE00004447,WBGENE00004449,WBGENE00004476,WBGENE00004486,WBGENE00004493,WBGENE00004497,WBGENE00004701,WBGENE00006601,WBGENE00008780,WBGENE00011605,WBGENE00017166
HP	Gliosis	HP:0002171	0.000113	3.94844	163	533	56	3056	WBGENE00000231,WBGENE00002855,WBGENE00006565,WBGENE00007049,WBGENE00007269,WBGENE00007305,WBGENE00007335,WBGENE00007448,WBGENE00007630,WBGENE00007777,WBGENE00007791,WBGENE00008053,WBGENE00008423,WBGENE00008662,WBGENE00008670,WBGENE00009402,WBGENE00010719,WBGENE00010874,WBGENE00011240,WBGENE00011510,WBGENE00011526,WBGENE00012169,WBGENE00012637,WBGENE00013025,WBGENE00013978,WBGENE00014007,WBGENE000…
HP	Leukoencephalopathy	HP:0002352	0.000171	3.76821	215	533	68	3056	WBGENE00000962,WBGENE00001094,WBGENE00001333,WBGENE00001488,WBGENE00001491,WBGENE00002196,WBGENE00002238,WBGENE00003061,WBGENE00003831,WBGENE00004063,WBGENE00007333,WBGENE00007354,WBGENE00007699,WBGENE00007700,WBGENE00007763,WBGENE00007824,WBGENE00008124,WBGENE00008258,WBGENE00008670,WBGENE00008780,WBGENE00009051,WBGENE00009054,WBGENE00009079,WBGENE00009101,WBGENE00009893,WBGENE00009992,WBGENE000…
HP	Intellectual disability, severe	HP:0010864	0.000189	3.72374	401	533	109	3056	WBGENE00000041,WBGENE00000198,WBGENE00000838,WBGENE00000938,WBGENE00000962,WBGENE00001155,WBGENE00001333,WBGENE00001488,WBGENE00001491,WBGENE00001558,WBGENE00001639,WBGENE00001645,WBGENE00001973,WBGENE00002196,WBGENE00002717,WBGENE00003041,WBGENE00003061,WBGENE00003214,WBGENE00003831,WBGENE00004046,WBGENE00004208,WBGENE00004737,WBGENE00005153,WBGENE00007082,WBGENE00007102,WBGENE00007354,WBGENE000…
HP	Dilation of lateral ventricles	HP:0006956	0.000307	3.51322	123	533	45	3056	WBGENE00000962,WBGENE00001333,WBGENE00001488,WBGENE00001491,WBGENE00002196,WBGENE00003009,WBGENE00005153,WBGENE00007354,WBGENE00007554,WBGENE00007699,WBGENE00007700,WBGENE00007763,WBGENE00008124,WBGENE00009054,WBGENE00009079,WBGENE00009101,WBGENE00009893,WBGENE00010265,WBGENE00011133,WBGENE00011510,WBGENE00011629,WBGENE00011867,WBGENE00012008,WBGENE00012638,WBGENE00012741,WBGENE00013476,WBGENE000…
HP	Abnormal esophagus physiology	HP:0025270	0.000363	3.44018	754	533	179	3056	WBGENE00000019,WBGENE00000020,WBGENE00000023,WBGENE00000063,WBGENE00000064,WBGENE00000065,WBGENE00000182,WBGENE00000231,WBGENE00000500,WBGENE00000962,WBGENE00001016,WBGENE00001019,WBGENE00001020,WBGENE00001026,WBGENE00001029,WBGENE00001046,WBGENE00001047,WBGENE00001056,WBGENE00001194,WBGENE00001333,WBGENE00001443,WBGENE00001488,WBGENE00001491,WBGENE00001502,WBGENE00001579,WBGENE00001645,WBGENE000…
HP	Abnormality of the basal ganglia	HP:0002134	0.000391	3.40777	272	533	80	3056	WBGENE00000198,WBGENE00000231,WBGENE00001155,WBGENE00001678,WBGENE00003061,WBGENE00003831,WBGENE00003947,WBGENE00004063,WBGENE00007049,WBGENE00007269,WBGENE00007305,WBGENE00007335,WBGENE00007448,WBGENE00007777,WBGENE00007791,WBGENE00007824,WBGENE00008423,WBGENE00008662,WBGENE00008685,WBGENE00009082,WBGENE00009402,WBGENE00009992,WBGENE00010719,WBGENE00010874,WBGENE00011240,WBGENE00011510,WBGENE000…
HP	Oculogyric crisis	HP:0010553	0.000561	3.25076	102	533	39	3056	WBGENE00000962,WBGENE00001020,WBGENE00001026,WBGENE00001029,WBGENE00001046,WBGENE00001333,WBGENE00001488,WBGENE00001491,WBGENE00002196,WBGENE00004063,WBGENE00007354,WBGENE00007699,WBGENE00007700,WBGENE00007763,WBGENE00008124,WBGENE00009054,WBGENE00009079,WBGENE00009101,WBGENE00009893,WBGENE00010265,WBGENE00011133,WBGENE00011867,WBGENE00012008,WBGENE00012638,WBGENE00012741,WBGENE00013476,WBGENE000…
HP	Thin ribs	HP:0000883	0.000597	3.22406	59	533	27	3056	WBGENE00001405,WBGENE00004755,WBGENE00007354,WBGENE00007699,WBGENE00007700,WBGENE00007763,WBGENE00008124,WBGENE00009054,WBGENE00009079,WBGENE00009101,WBGENE00009893,WBGENE00010265,WBGENE00011133,WBGENE00012008,WBGENE00012741,WBGENE00013476,WBGENE00016010,WBGENE00016081,WBGENE00016195,WBGENE00017817,WBGENE00018319,WBGENE00018359,WBGENE00019951,WBGENE00020053,WBGENE00020985,WBGENE00022617,WBGENE000…
HP	Abnormal glial cell morphology	HP:0100705	0.001066	2.9724	177	533	57	3056	WBGENE00000231,WBGENE00002855,WBGENE00006565,WBGENE00007049,WBGENE00007269,WBGENE00007305,WBGENE00007335,WBGENE00007448,WBGENE00007630,WBGENE00007777,WBGENE00007791,WBGENE00008053,WBGENE00008423,WBGENE00008662,WBGENE00008670,WBGENE00009402,WBGENE00010317,WBGENE00010719,WBGENE00010874,WBGENE00011240,WBGENE00011510,WBGENE00011526,WBGENE00012169,WBGENE00012637,WBGENE00013025,WBGENE00013978,WBGENE000…
HP	Arthrogryposis multiplex congenita	HP:0002804	0.001157	2.93659	124	533	44	3056	WBGENE00001405,WBGENE00003060,WBGENE00004899,WBGENE00004975,WBGENE00005153,WBGENE00007354,WBGENE00007699,WBGENE00007700,WBGENE00007763,WBGENE00008124,WBGENE00008780,WBGENE00009054,WBGENE00009079,WBGENE00009101,WBGENE00009563,WBGENE00009893,WBGENE00010265,WBGENE00011133,WBGENE00012008,WBGENE00012741,WBGENE00013476,WBGENE00013785,WBGENE00014139,WBGENE00015038,WBGENE00015249,WBGENE00015404,WBGENE000…
HP	Multifocal epileptiform discharges	HP:0010841	0.001226	2.91147	97	533	37	3056	WBGENE00000198,WBGENE00007354,WBGENE00007699,WBGENE00007700,WBGENE00007763,WBGENE00008124,WBGENE00008685,WBGENE00008918,WBGENE00009054,WBGENE00009079,WBGENE00009101,WBGENE00009893,WBGENE00010265,WBGENE00011133,WBGENE00011835,WBGENE00011860,WBGENE00011867,WBGENE00012008,WBGENE00012386,WBGENE00012543,WBGENE00012638,WBGENE00012741,WBGENE00013476,WBGENE00013881,WBGENE00015230,WBGENE00016010,WBGENE000…
HP	Bilateral generalized polymicrogyria	HP:0032410	0.001669	2.77762	83	533	33	3056	WBGENE00000962,WBGENE00001333,WBGENE00001488,WBGENE00001491,WBGENE00002196,WBGENE00007354,WBGENE00007699,WBGENE00007700,WBGENE00007763,WBGENE00008124,WBGENE00009054,WBGENE00009079,WBGENE00009101,WBGENE00009893,WBGENE00010265,WBGENE00011133,WBGENE00011867,WBGENE00012008,WBGENE00012638,WBGENE00012741,WBGENE00013476,WBGENE00015230,WBGENE00016010,WBGENE00016081,WBGENE00017817,WBGENE00018359,WBGENE000…
HP	Status epilepticus	HP:0002133	0.001912	2.71851	210	533	64	3056	WBGENE00000257,WBGENE00000800,WBGENE00000962,WBGENE00001333,WBGENE00001488,WBGENE00001491,WBGENE00001502,WBGENE00001503,WBGENE00001579,WBGENE00002196,WBGENE00003920,WBGENE00004063,WBGENE00004259,WBGENE00004980,WBGENE00007354,WBGENE00007699,WBGENE00007700,WBGENE00007763,WBGENE00007912,WBGENE00007977,WBGENE00008124,WBGENE00008685,WBGENE00009054,WBGENE00009079,WBGENE00009101,WBGENE00009505,WBGENE000…
HP	Reduced tendon reflexes	HP:0001315	0.002074	2.68322	551	533	136	3056	WBGENE00000019,WBGENE00000020,WBGENE00000023,WBGENE00000041,WBGENE00000231,WBGENE00000962,WBGENE00001016,WBGENE00001019,WBGENE00001020,WBGENE00001026,WBGENE00001029,WBGENE00001046,WBGENE00001194,WBGENE00001371,WBGENE00001443,WBGENE00001502,WBGENE00001509,WBGENE00001579,WBGENE00001596,WBGENE00001639,WBGENE00001678,WBGENE00002238,WBGENE00003061,WBGENE00003162,WBGENE00003815,WBGENE00003920,WBGENE000…
HP	Bilateral polymicrogyria	HP:0025646	0.002305	2.6373	84	533	33	3056	WBGENE00000962,WBGENE00001333,WBGENE00001488,WBGENE00001491,WBGENE00002196,WBGENE00007354,WBGENE00007699,WBGENE00007700,WBGENE00007763,WBGENE00008124,WBGENE00009054,WBGENE00009079,WBGENE00009101,WBGENE00009893,WBGENE00010265,WBGENE00011133,WBGENE00011867,WBGENE00012008,WBGENE00012638,WBGENE00012741,WBGENE00013476,WBGENE00015230,WBGENE00016010,WBGENE00016081,WBGENE00017817,WBGENE00018359,WBGENE000…
HP	EMG abnormality	HP:0003457	0.002433	2.61393	306	533	85	3056	WBGENE00000019,WBGENE00000020,WBGENE00000023,WBGENE00000962,WBGENE00001371,WBGENE00001509,WBGENE00001639,WBGENE00004063,WBGENE00004208,WBGENE00004899,WBGENE00006491,WBGENE00006565,WBGENE00006795,WBGENE00007049,WBGENE00007269,WBGENE00007305,WBGENE00007335,WBGENE00007448,WBGENE00007630,WBGENE00007777,WBGENE00007791,WBGENE00008053,WBGENE00008423,WBGENE00008662,WBGENE00009002,WBGENE00009402,WBGENE000…
HP	Abnormal lateral ventricle morphology	HP:0030047	0.002829	2.54837	148	533	49	3056	WBGENE00000962,WBGENE00001333,WBGENE00001488,WBGENE00001491,WBGENE00002196,WBGENE00003009,WBGENE00005153,WBGENE00007354,WBGENE00007554,WBGENE00007699,WBGENE00007700,WBGENE00007763,WBGENE00008124,WBGENE00009054,WBGENE00009079,WBGENE00009101,WBGENE00009893,WBGENE00010093,WBGENE00010265,WBGENE00011133,WBGENE00011338,WBGENE00011510,WBGENE00011527,WBGENE00011629,WBGENE00011867,WBGENE00012008,WBGENE000…
HP	Abnormality of joint mobility	HP:0011729	0.003069	2.51303	1004	533	222	3056	WBGENE00000019,WBGENE00000020,WBGENE00000023,WBGENE00000063,WBGENE00000064,WBGENE00000065,WBGENE00000182,WBGENE00000536,WBGENE00000549,WBGENE00000800,WBGENE00000938,WBGENE00001019,WBGENE00001020,WBGENE00001026,WBGENE00001029,WBGENE00001046,WBGENE00001194,WBGENE00001333,WBGENE00001371,WBGENE00001405,WBGENE00001443,WBGENE00001488,WBGENE00001491,WBGENE00001509,WBGENE00001678,WBGENE00001747,WBGENE000…
HP	Abnormal myelination	HP:0012447	0.003608	2.44278	571	533	139	3056	WBGENE00000019,WBGENE00000020,WBGENE00000023,WBGENE00000041,WBGENE00000114,WBGENE00000182,WBGENE00000231,WBGENE00000536,WBGENE00000800,WBGENE00000838,WBGENE00000938,WBGENE00001020,WBGENE00001026,WBGENE00001029,WBGENE00001046,WBGENE00001094,WBGENE00001155,WBGENE00001194,WBGENE00001371,WBGENE00001502,WBGENE00001509,WBGENE00001579,WBGENE00001973,WBGENE00002238,WBGENE00002717,WBGENE00003061,WBGENE000…
HP	Morphological central nervous system abnormality	HP:0002011	0.00378	2.42245	2153	533	419	3056	WBGENE00000019,WBGENE00000020,WBGENE00000023,WBGENE00000041,WBGENE00000063,WBGENE00000064,WBGENE00000065,WBGENE00000114,WBGENE00000182,WBGENE00000198,WBGENE00000231,WBGENE00000257,WBGENE00000269,WBGENE00000275,WBGENE00000500,WBGENE00000507,WBGENE00000508,WBGENE00000534,WBGENE00000549,WBGENE00000585,WBGENE00000800,WBGENE00000802,WBGENE00000838,WBGENE00000865,WBGENE00000938,WBGENE00000939,WBGENE000…
HP	Persistence of hemoglobin F	HP:0011904	0.00409	2.38832	28	533	16	3056	WBGENE00001020,WBGENE00001026,WBGENE00001029,WBGENE00001046,WBGENE00004416,WBGENE00004422,WBGENE00004430,WBGENE00004441,WBGENE00004445,WBGENE00004447,WBGENE00004449,WBGENE00004476,WBGENE00004486,WBGENE00004493,WBGENE00004497,WBGENE00009012
HP	Hyporeflexia	HP:0001265	0.004116	2.38548	414	533	107	3056	WBGENE00000019,WBGENE00000020,WBGENE00000023,WBGENE00000041,WBGENE00000231,WBGENE00000962,WBGENE00001016,WBGENE00001194,WBGENE00001371,WBGENE00001443,WBGENE00001502,WBGENE00001509,WBGENE00001579,WBGENE00001596,WBGENE00001639,WBGENE00001678,WBGENE00002238,WBGENE00003061,WBGENE00003162,WBGENE00003815,WBGENE00003920,WBGENE00004063,WBGENE00004899,WBGENE00004959,WBGENE00005007,WBGENE00005153,WBGENE000…
HP	Craniosynostosis	HP:0001363	0.004234	2.37324	154	533	50	3056	WBGENE00000507,WBGENE00000508,WBGENE00001747,WBGENE00003962,WBGENE00003964,WBGENE00004755,WBGENE00004959,WBGENE00005020,WBGENE00005153,WBGENE00006579,WBGENE00006733,WBGENE00007354,WBGENE00007699,WBGENE00007700,WBGENE00007763,WBGENE00008124,WBGENE00008918,WBGENE00009045,WBGENE00009054,WBGENE00009079,WBGENE00009101,WBGENE00009372,WBGENE00009893,WBGENE00010265,WBGENE00011133,WBGENE00012008,WBGENE000…
HP	Abnormal nervous system morphology	HP:0012639	0.005436	2.26473	2227	533	430	3056	WBGENE00000019,WBGENE00000020,WBGENE00000023,WBGENE00000041,WBGENE00000063,WBGENE00000064,WBGENE00000065,WBGENE00000114,WBGENE00000182,WBGENE00000198,WBGENE00000231,WBGENE00000257,WBGENE00000269,WBGENE00000275,WBGENE00000475,WBGENE00000500,WBGENE00000507,WBGENE00000508,WBGENE00000534,WBGENE00000536,WBGENE00000549,WBGENE00000585,WBGENE00000800,WBGENE00000802,WBGENE00000838,WBGENE00000865,WBGENE000…
HP	Dysphagia	HP:0002015	0.005686	2.24519	550	533	134	3056	WBGENE00000063,WBGENE00000064,WBGENE00000065,WBGENE00000231,WBGENE00000500,WBGENE00000962,WBGENE00001016,WBGENE00001019,WBGENE00001194,WBGENE00001333,WBGENE00001488,WBGENE00001491,WBGENE00001678,WBGENE00001973,WBGENE00002064,WBGENE00002196,WBGENE00003225,WBGENE00003562,WBGENE00004063,WBGENE00004208,WBGENE00004899,WBGENE00006565,WBGENE00006661,WBGENE00006734,WBGENE00007049,WBGENE00007269,WBGENE000…
HP	Neurodevelopmental abnormality	HP:0012759	0.00578	2.2381	2177	533	422	3056	WBGENE00000019,WBGENE00000020,WBGENE00000023,WBGENE00000041,WBGENE00000063,WBGENE00000064,WBGENE00000065,WBGENE00000114,WBGENE00000160,WBGENE00000182,WBGENE00000198,WBGENE00000257,WBGENE00000259,WBGENE00000269,WBGENE00000275,WBGENE00000500,WBGENE00000536,WBGENE00000549,WBGENE00000585,WBGENE00000800,WBGENE00000838,WBGENE00000865,WBGENE00000938,WBGENE00000939,WBGENE00000962,WBGENE00001020,WBGENE000…
HP	Functional abnormality of the gastrointestinal tract	HP:0012719	0.008162	2.08818	945	533	209	3056	WBGENE00000019,WBGENE00000020,WBGENE00000023,WBGENE00000063,WBGENE00000064,WBGENE00000065,WBGENE00000182,WBGENE00000231,WBGENE00000500,WBGENE00000865,WBGENE00000962,WBGENE00001016,WBGENE00001019,WBGENE00001020,WBGENE00001026,WBGENE00001029,WBGENE00001046,WBGENE00001047,WBGENE00001056,WBGENE00001194,WBGENE00001333,WBGENE00001443,WBGENE00001488,WBGENE00001491,WBGENE00001502,WBGENE00001579,WBGENE000…
HP	Abnormality of the musculature	HP:0003011	0.008293	2.08131	2194	533	424	3056	WBGENE00000019,WBGENE00000020,WBGENE00000023,WBGENE00000041,WBGENE00000063,WBGENE00000064,WBGENE00000065,WBGENE00000114,WBGENE00000182,WBGENE00000198,WBGENE00000231,WBGENE00000257,WBGENE00000259,WBGENE00000269,WBGENE00000275,WBGENE00000500,WBGENE00000536,WBGENE00000549,WBGENE00000585,WBGENE00000800,WBGENE00000802,WBGENE00000865,WBGENE00000938,WBGENE00000939,WBGENE00000962,WBGENE00001016,WBGENE000…
HP	Unsteady gait	HP:0002317	0.008365	2.07755	183	533	56	3056	WBGENE00000500,WBGENE00001502,WBGENE00001579,WBGENE00001645,WBGENE00003920,WBGENE00004063,WBGENE00004274,WBGENE00006352,WBGENE00006601,WBGENE00006755,WBGENE00007354,WBGENE00007554,WBGENE00007699,WBGENE00007700,WBGENE00007763,WBGENE00007824,WBGENE00008124,WBGENE00008670,WBGENE00009054,WBGENE00009079,WBGENE00009101,WBGENE00009505,WBGENE00009893,WBGENE00010265,WBGENE00011040,WBGENE00011133,WBGENE000…
HP	Hyperreflexia	HP:0001347	0.011385	1.94367	726	533	167	3056	WBGENE00000019,WBGENE00000020,WBGENE00000023,WBGENE00000231,WBGENE00000500,WBGENE00000800,WBGENE00001016,WBGENE00001020,WBGENE00001026,WBGENE00001029,WBGENE00001046,WBGENE00001094,WBGENE00001155,WBGENE00001167,WBGENE00001509,WBGENE00001579,WBGENE00001596,WBGENE00001639,WBGENE00001678,WBGENE00003041,WBGENE00003061,WBGENE00003214,WBGENE00003389,WBGENE00003815,WBGENE00003831,WBGENE00004063,WBGENE000…
HP	Hypsarrhythmia	HP:0002521	0.016254	1.78903	191	533	57	3056	WBGENE00000198,WBGENE00000838,WBGENE00001502,WBGENE00001579,WBGENE00001645,WBGENE00003920,WBGENE00005153,WBGENE00007333,WBGENE00007354,WBGENE00007699,WBGENE00007700,WBGENE00007763,WBGENE00008124,WBGENE00008685,WBGENE00009054,WBGENE00009079,WBGENE00009101,WBGENE00009505,WBGENE00009893,WBGENE00010265,WBGENE00010562,WBGENE00011040,WBGENE00011133,WBGENE00011510,WBGENE00011835,WBGENE00011860,WBGENE000…
HP	Generalized tonic seizure	HP:0010818	0.018529	1.73214	111	533	38	3056	WBGENE00000585,WBGENE00000962,WBGENE00001333,WBGENE00001488,WBGENE00001491,WBGENE00002196,WBGENE00002238,WBGENE00004980,WBGENE00007354,WBGENE00007699,WBGENE00007700,WBGENE00007763,WBGENE00007977,WBGENE00008124,WBGENE00008918,WBGENE00009054,WBGENE00009079,WBGENE00009101,WBGENE00009893,WBGENE00010265,WBGENE00011133,WBGENE00011867,WBGENE00012008,WBGENE00012638,WBGENE00012741,WBGENE00013476,WBGENE000…
HP	Abnormal subarachnoid space morphology	HP:0012703	0.020982	1.67814	149	533	47	3056	WBGENE00000962,WBGENE00001333,WBGENE00001488,WBGENE00001491,WBGENE00001558,WBGENE00002196,WBGENE00003815,WBGENE00004208,WBGENE00006416,WBGENE00007082,WBGENE00007354,WBGENE00007699,WBGENE00007700,WBGENE00007763,WBGENE00008124,WBGENE00008685,WBGENE00009054,WBGENE00009079,WBGENE00009101,WBGENE00009218,WBGENE00009893,WBGENE00010265,WBGENE00011133,WBGENE00011867,WBGENE00012008,WBGENE00012386,WBGENE000…
HP	Decreased head circumference	HP:0040195	0.02323	1.63395	1039	533	224	3056	WBGENE00000019,WBGENE00000020,WBGENE00000023,WBGENE00000041,WBGENE00000063,WBGENE00000064,WBGENE00000065,WBGENE00000114,WBGENE00000182,WBGENE00000198,WBGENE00000257,WBGENE00000275,WBGENE00000585,WBGENE00000800,WBGENE00000838,WBGENE00000962,WBGENE00001020,WBGENE00001026,WBGENE00001029,WBGENE00001046,WBGENE00001056,WBGENE00001194,WBGENE00001333,WBGENE00001443,WBGENE00001488,WBGENE00001491,WBGENE000…
HP	EEG with abnormally slow frequencies	HP:0011203	0.023695	1.62534	92	533	33	3056	WBGENE00001502,WBGENE00001579,WBGENE00003920,WBGENE00007354,WBGENE00007699,WBGENE00007700,WBGENE00007763,WBGENE00008053,WBGENE00008124,WBGENE00009054,WBGENE00009079,WBGENE00009101,WBGENE00009505,WBGENE00009893,WBGENE00010265,WBGENE00011040,WBGENE00011133,WBGENE00011867,WBGENE00012008,WBGENE00012741,WBGENE00013025,WBGENE00013476,WBGENE00016010,WBGENE00016081,WBGENE00017817,WBGENE00018359,WBGENE000…
HP	Abnormal erythrocyte enzyme level	HP:0030272	0.024844	1.60478	25	533	14	3056	WBGENE00004416,WBGENE00004422,WBGENE00004430,WBGENE00004441,WBGENE00004445,WBGENE00004447,WBGENE00004449,WBGENE00004476,WBGENE00004486,WBGENE00004493,WBGENE00004497,WBGENE00009126,WBGENE00011629,WBGENE00020107
HP	Decreased activity of mitochondrial respiratory chain	HP:0008972	0.029648	1.528	85	533	31	3056	WBGENE00001155,WBGENE00002238,WBGENE00003061,WBGENE00003831,WBGENE00006519,WBGENE00008164,WBGENE00009051,WBGENE00009353,WBGENE00009563,WBGENE00009992,WBGENE00010326,WBGENE00011510,WBGENE00011526,WBGENE00011897,WBGENE00012354,WBGENE00012376,WBGENE00012553,WBGENE00013308,WBGENE00013406,WBGENE00014224,WBGENE00015810,WBGENE00016392,WBGENE00016393,WBGENE00016943,WBGENE00017759,WBGENE00018361,WBGENE000…
HP	Abnormal skeletal muscle morphology	HP:0011805	0.032558	1.48734	1544	533	313	3056	WBGENE00000019,WBGENE00000020,WBGENE00000023,WBGENE00000063,WBGENE00000064,WBGENE00000065,WBGENE00000231,WBGENE00000269,WBGENE00000275,WBGENE00000500,WBGENE00000536,WBGENE00000800,WBGENE00000865,WBGENE00000962,WBGENE00001016,WBGENE00001019,WBGENE00001020,WBGENE00001026,WBGENE00001029,WBGENE00001046,WBGENE00001194,WBGENE00001333,WBGENE00001371,WBGENE00001405,WBGENE00001488,WBGENE00001491,WBGENE000…
HP	Abnormal radial artery morphology	HP:0031640	0.03313	1.47978	17	533	11	3056	WBGENE00004416,WBGENE00004422,WBGENE00004430,WBGENE00004441,WBGENE00004445,WBGENE00004447,WBGENE00004449,WBGENE00004476,WBGENE00004486,WBGENE00004493,WBGENE00004497
HP	Elevated red cell adenosine deaminase level	HP:0030270	0.03313	1.47978	17	533	11	3056	WBGENE00004416,WBGENE00004422,WBGENE00004430,WBGENE00004441,WBGENE00004445,WBGENE00004447,WBGENE00004449,WBGENE00004476,WBGENE00004486,WBGENE00004493,WBGENE00004497
HP	Radial artery aplasia	HP:0020118	0.03313	1.47978	17	533	11	3056	WBGENE00004416,WBGENE00004422,WBGENE00004430,WBGENE00004441,WBGENE00004445,WBGENE00004447,WBGENE00004449,WBGENE00004476,WBGENE00004486,WBGENE00004493,WBGENE00004497
HP	Macrocytic dyserythropoietic anemia	HP:0005532	0.03313	1.47978	17	533	11	3056	WBGENE00004416,WBGENE00004422,WBGENE00004430,WBGENE00004441,WBGENE00004445,WBGENE00004447,WBGENE00004449,WBGENE00004476,WBGENE00004486,WBGENE00004493,WBGENE00004497
HP	Microcephaly	HP:0000252	0.035535	1.44935	1028	533	221	3056	WBGENE00000019,WBGENE00000020,WBGENE00000023,WBGENE00000041,WBGENE00000063,WBGENE00000064,WBGENE00000065,WBGENE00000114,WBGENE00000182,WBGENE00000198,WBGENE00000257,WBGENE00000275,WBGENE00000585,WBGENE00000800,WBGENE00000838,WBGENE00000962,WBGENE00001020,WBGENE00001026,WBGENE00001029,WBGENE00001046,WBGENE00001056,WBGENE00001194,WBGENE00001333,WBGENE00001443,WBGENE00001488,WBGENE00001491,WBGENE000…
HP	Abnormality of brain morphology	HP:0012443	0.035648	1.44797	2057	533	399	3056	WBGENE00000019,WBGENE00000020,WBGENE00000023,WBGENE00000041,WBGENE00000063,WBGENE00000064,WBGENE00000065,WBGENE00000114,WBGENE00000182,WBGENE00000198,WBGENE00000231,WBGENE00000257,WBGENE00000269,WBGENE00000275,WBGENE00000500,WBGENE00000534,WBGENE00000549,WBGENE00000585,WBGENE00000800,WBGENE00000802,WBGENE00000838,WBGENE00000865,WBGENE00000938,WBGENE00000962,WBGENE00001016,WBGENE00001020,WBGENE000…
HP	Abnormal activity of mitochondrial respiratory chain	HP:0011922	0.038887	1.4102	86	533	31	3056	WBGENE00001155,WBGENE00002238,WBGENE00003061,WBGENE00003831,WBGENE00006519,WBGENE00008164,WBGENE00009051,WBGENE00009353,WBGENE00009563,WBGENE00009992,WBGENE00010326,WBGENE00011510,WBGENE00011526,WBGENE00011897,WBGENE00012354,WBGENE00012376,WBGENE00012553,WBGENE00013308,WBGENE00013406,WBGENE00014224,WBGENE00015810,WBGENE00016392,WBGENE00016393,WBGENE00016943,WBGENE00017759,WBGENE00018361,WBGENE000…
HP	Widened subarachnoid space	HP:0012704	0.047177	1.32627	136	533	43	3056	WBGENE00000962,WBGENE00001333,WBGENE00001488,WBGENE00001491,WBGENE00001558,WBGENE00002196,WBGENE00003815,WBGENE00004208,WBGENE00007082,WBGENE00007354,WBGENE00007699,WBGENE00007700,WBGENE00007763,WBGENE00008124,WBGENE00008685,WBGENE00009054,WBGENE00009079,WBGENE00009101,WBGENE00009218,WBGENE00009893,WBGENE00010265,WBGENE00011133,WBGENE00011867,WBGENE00012008,WBGENE00012386,WBGENE00012638,WBGENE000…

## Sheet: ALG-4 26G GO terms
source	term_name	term_id	adjusted_p_value	negative_log10_of_adjusted_p_value	term_size	query_size	intersection_size	effective_domain_size	intersections
GO:MF	catalytic activity	GO:0003824	1.27e-50	49.8973	4009	1796	925	11339	WBGENE00000041,WBGENE00000099,WBGENE00000101,WBGENE00000102,WBGENE00000112,WBGENE00000114,WBGENE00000115,WBGENE00000117,WBGENE00000123,WBGENE00000155,WBGENE00000182,WBGENE00000183,WBGENE00000184,WBGENE00000187,WBGENE00000198,WBGENE00000226,WBGENE00000229,WBGENE00000230,WBGENE00000248,WBGENE00000254,WBGENE00000259,WBGENE00000266,WBGENE00000268,WBGENE00000269,WBGENE00000270,WBGENE00000275,WBGENE000…
GO:MF	catalytic activity, acting on a protein	GO:0140096	4.23e-50	49.3741	1396	1796	432	11339	WBGENE00000099,WBGENE00000102,WBGENE00000155,WBGENE00000226,WBGENE00000254,WBGENE00000259,WBGENE00000275,WBGENE00000389,WBGENE00000405,WBGENE00000407,WBGENE00000410,WBGENE00000498,WBGENE00000500,WBGENE00000543,WBGENE00000544,WBGENE00000548,WBGENE00000879,WBGENE00000885,WBGENE00000913,WBGENE00001056,WBGENE00001112,WBGENE00001160,WBGENE00001229,WBGENE00001334,WBGENE00001405,WBGENE00001426,WBGENE000…
GO:MF	nucleotide binding	GO:0000166	1.35e-38	37.869	1310	1796	387	11339	WBGENE00000019,WBGENE00000020,WBGENE00000023,WBGENE00000099,WBGENE00000102,WBGENE00000182,WBGENE00000183,WBGENE00000184,WBGENE00000187,WBGENE00000226,WBGENE00000229,WBGENE00000248,WBGENE00000257,WBGENE00000275,WBGENE00000379,WBGENE00000390,WBGENE00000405,WBGENE00000407,WBGENE00000410,WBGENE00000418,WBGENE00000498,WBGENE00000800,WBGENE00000915,WBGENE00000939,WBGENE00000962,WBGENE00001007,WBGENE000…
GO:MF	nucleoside phosphate binding	GO:1901265	1.35e-38	37.869	1310	1796	387	11339	WBGENE00000019,WBGENE00000020,WBGENE00000023,WBGENE00000099,WBGENE00000102,WBGENE00000182,WBGENE00000183,WBGENE00000184,WBGENE00000187,WBGENE00000226,WBGENE00000229,WBGENE00000248,WBGENE00000257,WBGENE00000275,WBGENE00000379,WBGENE00000390,WBGENE00000405,WBGENE00000407,WBGENE00000410,WBGENE00000418,WBGENE00000498,WBGENE00000800,WBGENE00000915,WBGENE00000939,WBGENE00000962,WBGENE00001007,WBGENE000…
GO:MF	anion binding	GO:0043168	5.21e-37	36.2828	1300	1796	381	11339	WBGENE00000019,WBGENE00000020,WBGENE00000023,WBGENE00000099,WBGENE00000102,WBGENE00000182,WBGENE00000183,WBGENE00000184,WBGENE00000187,WBGENE00000226,WBGENE00000229,WBGENE00000248,WBGENE00000257,WBGENE00000275,WBGENE00000379,WBGENE00000390,WBGENE00000405,WBGENE00000407,WBGENE00000410,WBGENE00000418,WBGENE00000498,WBGENE00000800,WBGENE00000915,WBGENE00000939,WBGENE00000962,WBGENE00001007,WBGENE000…
GO:MF	small molecule binding	GO:0036094	1.91e-36	35.7185	1427	1796	406	11339	WBGENE00000019,WBGENE00000020,WBGENE00000023,WBGENE00000099,WBGENE00000102,WBGENE00000182,WBGENE00000183,WBGENE00000184,WBGENE00000187,WBGENE00000226,WBGENE00000229,WBGENE00000248,WBGENE00000257,WBGENE00000275,WBGENE00000379,WBGENE00000390,WBGENE00000405,WBGENE00000407,WBGENE00000410,WBGENE00000418,WBGENE00000498,WBGENE00000800,WBGENE00000915,WBGENE00000939,WBGENE00000962,WBGENE00001007,WBGENE000…
GO:MF	purine ribonucleotide binding	GO:0032555	2.26e-36	35.645	1138	1796	345	11339	WBGENE00000019,WBGENE00000020,WBGENE00000023,WBGENE00000099,WBGENE00000102,WBGENE00000182,WBGENE00000183,WBGENE00000184,WBGENE00000187,WBGENE00000226,WBGENE00000229,WBGENE00000248,WBGENE00000257,WBGENE00000275,WBGENE00000379,WBGENE00000390,WBGENE00000405,WBGENE00000407,WBGENE00000410,WBGENE00000418,WBGENE00000498,WBGENE00000800,WBGENE00000915,WBGENE00000939,WBGENE00000962,WBGENE00001007,WBGENE000…
GO:MF	ribonucleotide binding	GO:0032553	5.22e-36	35.2824	1156	1796	348	11339	WBGENE00000019,WBGENE00000020,WBGENE00000023,WBGENE00000099,WBGENE00000102,WBGENE00000182,WBGENE00000183,WBGENE00000184,WBGENE00000187,WBGENE00000226,WBGENE00000229,WBGENE00000248,WBGENE00000257,WBGENE00000275,WBGENE00000379,WBGENE00000390,WBGENE00000405,WBGENE00000407,WBGENE00000410,WBGENE00000418,WBGENE00000498,WBGENE00000800,WBGENE00000915,WBGENE00000939,WBGENE00000962,WBGENE00001007,WBGENE000…
GO:MF	purine nucleotide binding	GO:0017076	1.66e-35	34.7787	1157	1796	347	11339	WBGENE00000019,WBGENE00000020,WBGENE00000023,WBGENE00000099,WBGENE00000102,WBGENE00000182,WBGENE00000183,WBGENE00000184,WBGENE00000187,WBGENE00000226,WBGENE00000229,WBGENE00000248,WBGENE00000257,WBGENE00000275,WBGENE00000379,WBGENE00000390,WBGENE00000405,WBGENE00000407,WBGENE00000410,WBGENE00000418,WBGENE00000498,WBGENE00000800,WBGENE00000915,WBGENE00000939,WBGENE00000962,WBGENE00001007,WBGENE000…
GO:MF	purine ribonucleoside triphosphate binding	GO:0035639	2.3e-35	34.6383	1112	1796	337	11339	WBGENE00000019,WBGENE00000020,WBGENE00000023,WBGENE00000099,WBGENE00000102,WBGENE00000182,WBGENE00000183,WBGENE00000184,WBGENE00000187,WBGENE00000226,WBGENE00000229,WBGENE00000248,WBGENE00000257,WBGENE00000275,WBGENE00000379,WBGENE00000390,WBGENE00000405,WBGENE00000407,WBGENE00000410,WBGENE00000498,WBGENE00000800,WBGENE00000915,WBGENE00000939,WBGENE00000962,WBGENE00001007,WBGENE00001028,WBGENE000…
GO:MF	adenyl nucleotide binding	GO:0030554	1.56e-33	32.8071	971	1796	302	11339	WBGENE00000019,WBGENE00000020,WBGENE00000023,WBGENE00000099,WBGENE00000102,WBGENE00000226,WBGENE00000229,WBGENE00000257,WBGENE00000275,WBGENE00000379,WBGENE00000405,WBGENE00000407,WBGENE00000410,WBGENE00000418,WBGENE00000498,WBGENE00000800,WBGENE00000915,WBGENE00000939,WBGENE00000962,WBGENE00001007,WBGENE00001028,WBGENE00001030,WBGENE00001037,WBGENE00001090,WBGENE00001094,WBGENE00001153,WBGENE000…
GO:MF	adenyl ribonucleotide binding	GO:0032559	4.72e-33	32.326	967	1796	300	11339	WBGENE00000019,WBGENE00000020,WBGENE00000023,WBGENE00000099,WBGENE00000102,WBGENE00000226,WBGENE00000229,WBGENE00000257,WBGENE00000275,WBGENE00000379,WBGENE00000405,WBGENE00000407,WBGENE00000410,WBGENE00000418,WBGENE00000498,WBGENE00000800,WBGENE00000915,WBGENE00000939,WBGENE00000962,WBGENE00001007,WBGENE00001028,WBGENE00001030,WBGENE00001037,WBGENE00001090,WBGENE00001094,WBGENE00001153,WBGENE000…
GO:MF	phosphoprotein phosphatase activity	GO:0004721	5.89e-32	31.23	173	1796	97	11339	WBGENE00000389,WBGENE00000548,WBGENE00000913,WBGENE00004084,WBGENE00004086,WBGENE00004215,WBGENE00007354,WBGENE00007415,WBGENE00007610,WBGENE00007697,WBGENE00007699,WBGENE00007700,WBGENE00007763,WBGENE00008124,WBGENE00008661,WBGENE00009054,WBGENE00009079,WBGENE00009101,WBGENE00009129,WBGENE00009207,WBGENE00009401,WBGENE00009492,WBGENE00009548,WBGENE00009605,WBGENE00009701,WBGENE00009893,WBGENE000…
GO:MF	ATP binding	GO:0005524	1.31e-31	30.8819	946	1796	292	11339	WBGENE00000019,WBGENE00000020,WBGENE00000023,WBGENE00000099,WBGENE00000102,WBGENE00000226,WBGENE00000229,WBGENE00000257,WBGENE00000275,WBGENE00000379,WBGENE00000405,WBGENE00000407,WBGENE00000410,WBGENE00000498,WBGENE00000800,WBGENE00000915,WBGENE00000939,WBGENE00000962,WBGENE00001007,WBGENE00001028,WBGENE00001030,WBGENE00001037,WBGENE00001090,WBGENE00001094,WBGENE00001160,WBGENE00001487,WBGENE000…
GO:MF	carbohydrate derivative binding	GO:0097367	2.3e-30	29.6375	1233	1796	350	11339	WBGENE00000019,WBGENE00000020,WBGENE00000023,WBGENE00000099,WBGENE00000102,WBGENE00000182,WBGENE00000183,WBGENE00000184,WBGENE00000187,WBGENE00000226,WBGENE00000229,WBGENE00000248,WBGENE00000257,WBGENE00000275,WBGENE00000379,WBGENE00000390,WBGENE00000405,WBGENE00000407,WBGENE00000410,WBGENE00000418,WBGENE00000498,WBGENE00000800,WBGENE00000915,WBGENE00000939,WBGENE00000962,WBGENE00001007,WBGENE000…
GO:MF	phosphatase activity	GO:0016791	2.56e-26	25.591	246	1796	112	11339	WBGENE00000389,WBGENE00000548,WBGENE00000913,WBGENE00004084,WBGENE00004086,WBGENE00004215,WBGENE00006460,WBGENE00007354,WBGENE00007415,WBGENE00007548,WBGENE00007610,WBGENE00007697,WBGENE00007699,WBGENE00007700,WBGENE00007763,WBGENE00007912,WBGENE00008124,WBGENE00008661,WBGENE00008765,WBGENE00008801,WBGENE00008802,WBGENE00009054,WBGENE00009079,WBGENE00009101,WBGENE00009129,WBGENE00009207,WBGENE000…
GO:MF	phosphoric ester hydrolase activity	GO:0042578	1.98e-25	24.7043	283	1796	121	11339	WBGENE00000389,WBGENE00000548,WBGENE00000913,WBGENE00004040,WBGENE00004084,WBGENE00004086,WBGENE00004215,WBGENE00006460,WBGENE00007354,WBGENE00007415,WBGENE00007548,WBGENE00007610,WBGENE00007697,WBGENE00007699,WBGENE00007700,WBGENE00007763,WBGENE00007912,WBGENE00008124,WBGENE00008661,WBGENE00008765,WBGENE00008801,WBGENE00008802,WBGENE00009054,WBGENE00009079,WBGENE00009101,WBGENE00009129,WBGENE000…
GO:MF	kinase activity	GO:0016301	8.32e-25	24.0798	567	1796	191	11339	WBGENE00000099,WBGENE00000101,WBGENE00000102,WBGENE00000226,WBGENE00000275,WBGENE00000405,WBGENE00000407,WBGENE00000410,WBGENE00000498,WBGENE00000517,WBGENE00001160,WBGENE00001487,WBGENE00001526,WBGENE00001538,WBGENE00001746,WBGENE00002147,WBGENE00002191,WBGENE00002193,WBGENE00002198,WBGENE00002201,WBGENE00002202,WBGENE00002204,WBGENE00002206,WBGENE00002208,WBGENE00002240,WBGENE00002583,WBGENE000…
GO:MF	transferase activity, transferring phosphorus-containing groups	GO:0016772	5.06e-24	23.2959	675	1796	214	11339	WBGENE00000099,WBGENE00000101,WBGENE00000102,WBGENE00000123,WBGENE00000226,WBGENE00000275,WBGENE00000405,WBGENE00000407,WBGENE00000410,WBGENE00000498,WBGENE00000517,WBGENE00001160,WBGENE00001487,WBGENE00001526,WBGENE00001538,WBGENE00001596,WBGENE00001746,WBGENE00002147,WBGENE00002191,WBGENE00002193,WBGENE00002198,WBGENE00002201,WBGENE00002202,WBGENE00002204,WBGENE00002206,WBGENE00002208,WBGENE000…
GO:MF	protein kinase activity	GO:0004672	8.74e-23	22.0585	446	1796	158	11339	WBGENE00000099,WBGENE00000102,WBGENE00000226,WBGENE00000275,WBGENE00000405,WBGENE00000407,WBGENE00000410,WBGENE00000498,WBGENE00001160,WBGENE00001487,WBGENE00001526,WBGENE00001538,WBGENE00001746,WBGENE00002147,WBGENE00002191,WBGENE00002193,WBGENE00002198,WBGENE00002201,WBGENE00002202,WBGENE00002204,WBGENE00002206,WBGENE00002208,WBGENE00002240,WBGENE00002583,WBGENE00002694,WBGENE00003150,WBGENE000…
GO:MF	phosphotransferase activity, alcohol group as acceptor	GO:0016773	1.52e-20	19.8183	504	1796	167	11339	WBGENE00000099,WBGENE00000102,WBGENE00000226,WBGENE00000275,WBGENE00000405,WBGENE00000407,WBGENE00000410,WBGENE00000498,WBGENE00001160,WBGENE00001487,WBGENE00001526,WBGENE00001538,WBGENE00001746,WBGENE00002147,WBGENE00002191,WBGENE00002193,WBGENE00002198,WBGENE00002201,WBGENE00002202,WBGENE00002204,WBGENE00002206,WBGENE00002208,WBGENE00002240,WBGENE00002583,WBGENE00002694,WBGENE00003150,WBGENE000…
GO:MF	protein tyrosine phosphatase activity	GO:0004725	3.99e-20	19.3993	113	1796	63	11339	WBGENE00000389,WBGENE00000548,WBGENE00000913,WBGENE00004084,WBGENE00004215,WBGENE00007415,WBGENE00007610,WBGENE00007697,WBGENE00008661,WBGENE00009129,WBGENE00009207,WBGENE00009401,WBGENE00009492,WBGENE00009548,WBGENE00009605,WBGENE00009701,WBGENE00010072,WBGENE00010136,WBGENE00010634,WBGENE00010636,WBGENE00010869,WBGENE00010876,WBGENE00011918,WBGENE00011967,WBGENE00012138,WBGENE00012173,WBGENE000…
GO:MF	ion binding	GO:0043167	9.84e-20	19.0069	2751	1796	601	11339	WBGENE00000019,WBGENE00000020,WBGENE00000023,WBGENE00000097,WBGENE00000099,WBGENE00000101,WBGENE00000102,WBGENE00000123,WBGENE00000151,WBGENE00000155,WBGENE00000182,WBGENE00000183,WBGENE00000184,WBGENE00000187,WBGENE00000226,WBGENE00000228,WBGENE00000229,WBGENE00000248,WBGENE00000257,WBGENE00000275,WBGENE00000376,WBGENE00000379,WBGENE00000390,WBGENE00000392,WBGENE00000405,WBGENE00000407,WBGENE000…
GO:MF	hydrolase activity	GO:0016787	2.07e-18	17.684	1491	1796	365	11339	WBGENE00000155,WBGENE00000182,WBGENE00000183,WBGENE00000184,WBGENE00000187,WBGENE00000248,WBGENE00000254,WBGENE00000369,WBGENE00000376,WBGENE00000379,WBGENE00000389,WBGENE00000390,WBGENE00000392,WBGENE00000543,WBGENE00000544,WBGENE00000548,WBGENE00000913,WBGENE00000915,WBGENE00000939,WBGENE00001016,WBGENE00001056,WBGENE00001090,WBGENE00001093,WBGENE00001112,WBGENE00001167,WBGENE00001168,WBGENE000…
GO:MF	non-membrane spanning protein tyrosine kinase activity	GO:0004715	2.49e-17	16.6038	39	1796	32	11339	WBGENE00002193,WBGENE00002198,WBGENE00002204,WBGENE00002206,WBGENE00002208,WBGENE00004962,WBGENE00009039,WBGENE00009160,WBGENE00010712,WBGENE00011039,WBGENE00012010,WBGENE00012011,WBGENE00012172,WBGENE00012785,WBGENE00013475,WBGENE00013801,WBGENE00013811,WBGENE00014813,WBGENE00015994,WBGENE00016085,WBGENE00016416,WBGENE00016462,WBGENE00016954,WBGENE00017736,WBGENE00018999,WBGENE00019081,WBGENE000…
GO:MF	protein serine/threonine kinase activity	GO:0004674	2.67e-17	16.574	256	1796	100	11339	WBGENE00000102,WBGENE00000226,WBGENE00000498,WBGENE00001160,WBGENE00002147,WBGENE00002201,WBGENE00002583,WBGENE00002694,WBGENE00003150,WBGENE00003403,WBGENE00004879,WBGENE00004960,WBGENE00004980,WBGENE00006382,WBGENE00006579,WBGENE00006941,WBGENE00007028,WBGENE00007049,WBGENE00007269,WBGENE00007305,WBGENE00007335,WBGENE00007448,WBGENE00007563,WBGENE00007777,WBGENE00007791,WBGENE00007977,WBGENE000…
GO:MF	hydrolase activity, acting on ester bonds	GO:0016788	7.26e-17	16.1388	542	1796	167	11339	WBGENE00000369,WBGENE00000376,WBGENE00000389,WBGENE00000548,WBGENE00000913,WBGENE00000939,WBGENE00001016,WBGENE00002147,WBGENE00003403,WBGENE00003504,WBGENE00003906,WBGENE00004040,WBGENE00004084,WBGENE00004086,WBGENE00004215,WBGENE00004323,WBGENE00006460,WBGENE00006626,WBGENE00007354,WBGENE00007415,WBGENE00007548,WBGENE00007610,WBGENE00007697,WBGENE00007699,WBGENE00007700,WBGENE00007763,WBGENE000…
GO:MF	transferase activity	GO:0016740	4.34e-13	12.3624	1643	1796	373	11339	WBGENE00000099,WBGENE00000101,WBGENE00000102,WBGENE00000123,WBGENE00000226,WBGENE00000268,WBGENE00000269,WBGENE00000270,WBGENE00000275,WBGENE00000405,WBGENE00000407,WBGENE00000410,WBGENE00000498,WBGENE00000500,WBGENE00000517,WBGENE00000833,WBGENE00001160,WBGENE00001239,WBGENE00001241,WBGENE00001242,WBGENE00001245,WBGENE00001246,WBGENE00001487,WBGENE00001505,WBGENE00001526,WBGENE00001538,WBGENE000…
GO:MF	structural constituent of ribosome	GO:0003735	1.74e-12	11.7588	163	1796	67	11339	WBGENE00004408,WBGENE00004409,WBGENE00004410,WBGENE00004412,WBGENE00004414,WBGENE00004415,WBGENE00004416,WBGENE00004418,WBGENE00004420,WBGENE00004422,WBGENE00004424,WBGENE00004425,WBGENE00004426,WBGENE00004428,WBGENE00004430,WBGENE00004431,WBGENE00004433,WBGENE00004439,WBGENE00004441,WBGENE00004442,WBGENE00004444,WBGENE00004445,WBGENE00004446,WBGENE00004447,WBGENE00004448,WBGENE00004449,WBGENE000…
GO:MF	protein serine/threonine phosphatase activity	GO:0004722	2.7e-12	11.5694	52	1796	33	11339	WBGENE00004086,WBGENE00007354,WBGENE00007699,WBGENE00007700,WBGENE00007763,WBGENE00008124,WBGENE00009054,WBGENE00009079,WBGENE00009101,WBGENE00009893,WBGENE00010265,WBGENE00010992,WBGENE00011133,WBGENE00011808,WBGENE00011953,WBGENE00012008,WBGENE00012741,WBGENE00013476,WBGENE00015661,WBGENE00016010,WBGENE00016081,WBGENE00016398,WBGENE00017636,WBGENE00017817,WBGENE00018232,WBGENE00018359,WBGENE000…
GO:MF	protein binding	GO:0005515	1.2e-08	7.92063	3013	1796	591	11339	WBGENE00000007,WBGENE00000123,WBGENE00000150,WBGENE00000155,WBGENE00000158,WBGENE00000160,WBGENE00000198,WBGENE00000226,WBGENE00000228,WBGENE00000236,WBGENE00000257,WBGENE00000293,WBGENE00000376,WBGENE00000379,WBGENE00000392,WBGENE00000419,WBGENE00000500,WBGENE00000548,WBGENE00000567,WBGENE00000777,WBGENE00000802,WBGENE00000836,WBGENE00000837,WBGENE00000838,WBGENE00000875,WBGENE00000915,WBGENE000…
GO:MF	transmembrane receptor protein tyrosine kinase activity	GO:0004714	1.34e-08	7.87293	68	1796	34	11339	WBGENE00002193,WBGENE00002198,WBGENE00002204,WBGENE00002206,WBGENE00002208,WBGENE00003150,WBGENE00004962,WBGENE00009039,WBGENE00009160,WBGENE00010712,WBGENE00011039,WBGENE00012010,WBGENE00012011,WBGENE00012172,WBGENE00012785,WBGENE00013475,WBGENE00013801,WBGENE00013811,WBGENE00014813,WBGENE00015994,WBGENE00016085,WBGENE00016416,WBGENE00016462,WBGENE00016954,WBGENE00017736,WBGENE00018999,WBGENE000…
GO:MF	protein tyrosine kinase activity	GO:0004713	3.7e-07	6.43182	82	1796	36	11339	WBGENE00001487,WBGENE00002193,WBGENE00002198,WBGENE00002204,WBGENE00002206,WBGENE00002208,WBGENE00002240,WBGENE00003150,WBGENE00004962,WBGENE00009039,WBGENE00009160,WBGENE00010712,WBGENE00011039,WBGENE00012010,WBGENE00012011,WBGENE00012172,WBGENE00012785,WBGENE00013475,WBGENE00013801,WBGENE00013811,WBGENE00014813,WBGENE00015994,WBGENE00016085,WBGENE00016416,WBGENE00016462,WBGENE00016954,WBGENE000…
GO:MF	translation initiation factor activity	GO:0003743	5.12e-07	6.29054	40	1796	23	11339	WBGENE00001225,WBGENE00001227,WBGENE00001228,WBGENE00001229,WBGENE00001230,WBGENE00001232,WBGENE00001233,WBGENE00002059,WBGENE00002061,WBGENE00002063,WBGENE00002064,WBGENE00002066,WBGENE00008480,WBGENE00008670,WBGENE00010560,WBGENE00015920,WBGENE00016113,WBGENE00016496,WBGENE00019162,WBGENE00019543,WBGENE00021351,WBGENE00021466,WBGENE00303000
GO:MF	transmembrane receptor protein kinase activity	GO:0019199	5.78e-07	6.23776	76	1796	34	11339	WBGENE00002193,WBGENE00002198,WBGENE00002204,WBGENE00002206,WBGENE00002208,WBGENE00003150,WBGENE00004962,WBGENE00009039,WBGENE00009160,WBGENE00010712,WBGENE00011039,WBGENE00012010,WBGENE00012011,WBGENE00012172,WBGENE00012785,WBGENE00013475,WBGENE00013801,WBGENE00013811,WBGENE00014813,WBGENE00015994,WBGENE00016085,WBGENE00016416,WBGENE00016462,WBGENE00016954,WBGENE00017736,WBGENE00018999,WBGENE000…
GO:MF	translation regulator activity	GO:0045182	8.83e-07	6.05404	70	1796	32	11339	WBGENE00000770,WBGENE00000771,WBGENE00001168,WBGENE00001225,WBGENE00001227,WBGENE00001228,WBGENE00001229,WBGENE00001230,WBGENE00001232,WBGENE00001233,WBGENE00002059,WBGENE00002061,WBGENE00002063,WBGENE00002064,WBGENE00002066,WBGENE00008480,WBGENE00008670,WBGENE00010405,WBGENE00010560,WBGENE00012768,WBGENE00015920,WBGENE00016113,WBGENE00016496,WBGENE00018405,WBGENE00018846,WBGENE00019162,WBGENE000…
GO:MF	electron transfer activity	GO:0009055	1.4e-06	5.85462	30	1796	19	11339	WBGENE00000869,WBGENE00002162,WBGENE00002855,WBGENE00003225,WBGENE00003831,WBGENE00006433,WBGENE00006463,WBGENE00006519,WBGENE00009187,WBGENE00009992,WBGENE00012354,WBGENE00012376,WBGENE00013854,WBGENE00016392,WBGENE00016393,WBGENE00017734,WBGENE00020417,WBGENE00020636,WBGENE00021562
GO:MF	translation regulator activity, nucleic acid binding	GO:0090079	2.51e-06	5.60114	62	1796	29	11339	WBGENE00001168,WBGENE00001225,WBGENE00001227,WBGENE00001228,WBGENE00001229,WBGENE00001230,WBGENE00001232,WBGENE00001233,WBGENE00002059,WBGENE00002061,WBGENE00002063,WBGENE00002064,WBGENE00002066,WBGENE00008480,WBGENE00008670,WBGENE00010405,WBGENE00010560,WBGENE00012768,WBGENE00015920,WBGENE00016113,WBGENE00016496,WBGENE00018405,WBGENE00018846,WBGENE00019162,WBGENE00019543,WBGENE00020269,WBGENE000…
GO:MF	ubiquitin-protein transferase activity	GO:0004842	2.81e-06	5.55077	114	1796	43	11339	WBGENE00000500,WBGENE00002344,WBGENE00003917,WBGENE00004320,WBGENE00004381,WBGENE00004759,WBGENE00004768,WBGENE00006701,WBGENE00006702,WBGENE00006703,WBGENE00006704,WBGENE00006707,WBGENE00006713,WBGENE00006715,WBGENE00006719,WBGENE00006720,WBGENE00006734,WBGENE00007009,WBGENE00007574,WBGENE00007626,WBGENE00007643,WBGENE00008330,WBGENE00008429,WBGENE00008433,WBGENE00008871,WBGENE00009477,WBGENE000…
GO:MF	translation factor activity, RNA binding	GO:0008135	7.54e-06	5.12263	61	1796	28	11339	WBGENE00001168,WBGENE00001225,WBGENE00001227,WBGENE00001228,WBGENE00001229,WBGENE00001230,WBGENE00001232,WBGENE00001233,WBGENE00002059,WBGENE00002061,WBGENE00002063,WBGENE00002064,WBGENE00002066,WBGENE00008480,WBGENE00008670,WBGENE00010405,WBGENE00010560,WBGENE00012768,WBGENE00015920,WBGENE00016113,WBGENE00016496,WBGENE00018846,WBGENE00019162,WBGENE00019543,WBGENE00020269,WBGENE00021351,WBGENE000…
GO:MF	ubiquitin-like protein transferase activity	GO:0019787	1.19e-05	4.92585	127	1796	45	11339	WBGENE00000500,WBGENE00001574,WBGENE00002344,WBGENE00003917,WBGENE00004320,WBGENE00004381,WBGENE00004759,WBGENE00004768,WBGENE00006701,WBGENE00006702,WBGENE00006703,WBGENE00006704,WBGENE00006707,WBGENE00006713,WBGENE00006715,WBGENE00006719,WBGENE00006720,WBGENE00006734,WBGENE00007009,WBGENE00007574,WBGENE00007626,WBGENE00007643,WBGENE00008330,WBGENE00008429,WBGENE00008433,WBGENE00008871,WBGENE000…
GO:MF	enzyme binding	GO:0019899	2.01e-05	4.69703	252	1796	73	11339	WBGENE00000419,WBGENE00000500,WBGENE00000836,WBGENE00000837,WBGENE00000838,WBGENE00001579,WBGENE00002344,WBGENE00002694,WBGENE00003025,WBGENE00003196,WBGENE00003777,WBGENE00003917,WBGENE00004323,WBGENE00004357,WBGENE00004381,WBGENE00004767,WBGENE00004888,WBGENE00004953,WBGENE00005014,WBGENE00006701,WBGENE00006713,WBGENE00006719,WBGENE00006727,WBGENE00006728,WBGENE00006730,WBGENE00006734,WBGENE000…
GO:MF	nucleoside-triphosphatase activity	GO:0017111	6.59e-05	4.18111	292	1796	80	11339	WBGENE00000182,WBGENE00000183,WBGENE00000184,WBGENE00000187,WBGENE00000248,WBGENE00000379,WBGENE00000390,WBGENE00000915,WBGENE00001093,WBGENE00001167,WBGENE00001168,WBGENE00001509,WBGENE00001678,WBGENE00001860,WBGENE00002005,WBGENE00002007,WBGENE00002008,WBGENE00002010,WBGENE00002219,WBGENE00002229,WBGENE00003367,WBGENE00003818,WBGENE00004266,WBGENE00004269,WBGENE00004271,WBGENE00004272,WBGENE000…
GO:MF	proton transmembrane transporter activity	GO:0015078	6.74e-05	4.1716	70	1796	29	11339	WBGENE00000206,WBGENE00000209,WBGENE00000229,WBGENE00000230,WBGENE00002162,WBGENE00003735,WBGENE00006519,WBGENE00006768,WBGENE00006911,WBGENE00006917,WBGENE00006918,WBGENE00006919,WBGENE00006920,WBGENE00007385,WBGENE00009882,WBGENE00010130,WBGENE00010419,WBGENE00011015,WBGENE00011273,WBGENE00012033,WBGENE00012354,WBGENE00013025,WBGENE00016258,WBGENE00017982,WBGENE00018698,WBGENE00019061,WBGENE000…
GO:MF	hydrolase activity, acting on acid anhydrides	GO:0016817	0.000138	3.86159	321	1796	85	11339	WBGENE00000182,WBGENE00000183,WBGENE00000184,WBGENE00000187,WBGENE00000248,WBGENE00000379,WBGENE00000390,WBGENE00000915,WBGENE00001093,WBGENE00001167,WBGENE00001168,WBGENE00001509,WBGENE00001678,WBGENE00001860,WBGENE00002005,WBGENE00002007,WBGENE00002008,WBGENE00002010,WBGENE00002219,WBGENE00002229,WBGENE00003367,WBGENE00003580,WBGENE00003818,WBGENE00004266,WBGENE00004269,WBGENE00004271,WBGENE000…
GO:MF	hydrolase activity, acting on acid anhydrides, in phosphorus-containing anhydrides	GO:0016818	0.000138	3.86159	321	1796	85	11339	WBGENE00000182,WBGENE00000183,WBGENE00000184,WBGENE00000187,WBGENE00000248,WBGENE00000379,WBGENE00000390,WBGENE00000915,WBGENE00001093,WBGENE00001167,WBGENE00001168,WBGENE00001509,WBGENE00001678,WBGENE00001860,WBGENE00002005,WBGENE00002007,WBGENE00002008,WBGENE00002010,WBGENE00002219,WBGENE00002229,WBGENE00003367,WBGENE00003580,WBGENE00003818,WBGENE00004266,WBGENE00004269,WBGENE00004271,WBGENE000…
GO:MF	ATP-dependent activity	GO:0140657	0.000173	3.76193	352	1796	91	11339	WBGENE00000019,WBGENE00000020,WBGENE00000023,WBGENE00000257,WBGENE00000379,WBGENE00000915,WBGENE00000962,WBGENE00001016,WBGENE00001090,WBGENE00001303,WBGENE00001598,WBGENE00001812,WBGENE00001840,WBGENE00001860,WBGENE00002005,WBGENE00002007,WBGENE00002008,WBGENE00002010,WBGENE00002036,WBGENE00002083,WBGENE00002219,WBGENE00002229,WBGENE00002244,WBGENE00003153,WBGENE00003367,WBGENE00003389,WBGENE000…
GO:MF	pyrophosphatase activity	GO:0016462	0.000179	3.74694	318	1796	84	11339	WBGENE00000182,WBGENE00000183,WBGENE00000184,WBGENE00000187,WBGENE00000248,WBGENE00000379,WBGENE00000390,WBGENE00000915,WBGENE00001093,WBGENE00001167,WBGENE00001168,WBGENE00001509,WBGENE00001678,WBGENE00001860,WBGENE00002005,WBGENE00002007,WBGENE00002008,WBGENE00002010,WBGENE00002219,WBGENE00002229,WBGENE00003367,WBGENE00003818,WBGENE00004266,WBGENE00004269,WBGENE00004271,WBGENE00004272,WBGENE000…
GO:MF	S-acyltransferase activity	GO:0016417	0.000256	3.5912	20	1796	13	11339	WBGENE00004964,WBGENE00007637,WBGENE00007824,WBGENE00009082,WBGENE00009342,WBGENE00010323,WBGENE00010892,WBGENE00014075,WBGENE00015164,WBGENE00018009,WBGENE00019257,WBGENE00020066,WBGENE00020950
GO:MF	oxidoreduction-driven active transmembrane transporter activity	GO:0015453	0.000806	3.09388	16	1796	11	11339	WBGENE00002162,WBGENE00003831,WBGENE00006463,WBGENE00006519,WBGENE00009992,WBGENE00012354,WBGENE00012376,WBGENE00016393,WBGENE00020417,WBGENE00020636,WBGENE00021562
GO:MF	primary active transmembrane transporter activity	GO:0015399	0.001401	2.85345	104	1796	35	11339	WBGENE00000019,WBGENE00000020,WBGENE00000023,WBGENE00001303,WBGENE00001812,WBGENE00002162,WBGENE00003153,WBGENE00003831,WBGENE00004063,WBGENE00004736,WBGENE00006463,WBGENE00006519,WBGENE00006917,WBGENE00006918,WBGENE00006919,WBGENE00006920,WBGENE00007060,WBGENE00007248,WBGENE00007631,WBGENE00008950,WBGENE00009920,WBGENE00009992,WBGENE00010130,WBGENE00012354,WBGENE00012376,WBGENE00012925,WBGENE000…
GO:MF	signal sequence binding	GO:0005048	0.001955	2.70891	17	1796	11	11339	WBGENE00003793,WBGENE00008164,WBGENE00008857,WBGENE00009012,WBGENE00009092,WBGENE00009313,WBGENE00009956,WBGENE00010097,WBGENE00013311,WBGENE00016195,WBGENE00017799
GO:MF	ATP hydrolysis activity	GO:0016887	0.002229	2.65189	132	1796	41	11339	WBGENE00000379,WBGENE00000915,WBGENE00001860,WBGENE00002005,WBGENE00002007,WBGENE00002008,WBGENE00002010,WBGENE00002219,WBGENE00002229,WBGENE00003367,WBGENE00003818,WBGENE00004337,WBGENE00004340,WBGENE00004373,WBGENE00004501,WBGENE00004502,WBGENE00004503,WBGENE00004504,WBGENE00004505,WBGENE00004506,WBGENE00004874,WBGENE00006059,WBGENE00006974,WBGENE00007444,WBGENE00008053,WBGENE00008682,WBGENE000…
GO:MF	ubiquitin protein ligase activity	GO:0061630	0.002928	2.53346	62	1796	24	11339	WBGENE00000500,WBGENE00003917,WBGENE00004320,WBGENE00004381,WBGENE00004768,WBGENE00006734,WBGENE00007009,WBGENE00007574,WBGENE00007626,WBGENE00008330,WBGENE00008871,WBGENE00009477,WBGENE00010923,WBGENE00013538,WBGENE00014031,WBGENE00016156,WBGENE00016158,WBGENE00016326,WBGENE00016888,WBGENE00017373,WBGENE00020423,WBGENE00021842,WBGENE00022069,WBGENE00022358
GO:MF	NADH dehydrogenase (ubiquinone) activity	GO:0008137	0.003405	2.46784	10	1796	8	11339	WBGENE00003831,WBGENE00006463,WBGENE00009992,WBGENE00012376,WBGENE00016393,WBGENE00020417,WBGENE00020636,WBGENE00021562
GO:MF	NADH dehydrogenase activity	GO:0003954	0.003405	2.46784	10	1796	8	11339	WBGENE00003831,WBGENE00006463,WBGENE00009992,WBGENE00012376,WBGENE00016393,WBGENE00020417,WBGENE00020636,WBGENE00021562
GO:MF	NADH dehydrogenase (quinone) activity	GO:0050136	0.003405	2.46784	10	1796	8	11339	WBGENE00003831,WBGENE00006463,WBGENE00009992,WBGENE00012376,WBGENE00016393,WBGENE00020417,WBGENE00020636,WBGENE00021562
GO:MF	proton-transporting ATP synthase activity, rotational mechanism	GO:0046933	0.003405	2.46784	10	1796	8	11339	WBGENE00000229,WBGENE00000230,WBGENE00010419,WBGENE00011273,WBGENE00013025,WBGENE00017982,WBGENE00019061,WBGENE00022089
GO:MF	NAD(P)H dehydrogenase (quinone) activity	GO:0003955	0.003405	2.46784	10	1796	8	11339	WBGENE00003831,WBGENE00006463,WBGENE00009992,WBGENE00012376,WBGENE00016393,WBGENE00020417,WBGENE00020636,WBGENE00021562
GO:MF	lipid transporter activity	GO:0005319	0.004365	2.35999	48	1796	20	11339	WBGENE00000019,WBGENE00000020,WBGENE00000023,WBGENE00007144,WBGENE00008832,WBGENE00008856,WBGENE00009218,WBGENE00009498,WBGENE00009753,WBGENE00012360,WBGENE00012930,WBGENE00013034,WBGENE00013052,WBGENE00016331,WBGENE00018632,WBGENE00019530,WBGENE00019531,WBGENE00021854,WBGENE00022155,WBGENE00022347
GO:MF	protein transporter activity	GO:0140318	0.00447	2.34969	8	1796	7	11339	WBGENE00001303,WBGENE00007686,WBGENE00008164,WBGENE00008857,WBGENE00009092,WBGENE00009313,WBGENE00013311
GO:MF	proteasome-activating activity	GO:0036402	0.00447	2.34969	8	1796	7	11339	WBGENE00004501,WBGENE00004502,WBGENE00004503,WBGENE00004504,WBGENE00004505,WBGENE00004506,WBGENE00015688
GO:MF	protein transmembrane transporter activity	GO:0008320	0.00447	2.34969	8	1796	7	11339	WBGENE00001303,WBGENE00007686,WBGENE00008164,WBGENE00008857,WBGENE00009092,WBGENE00009313,WBGENE00013311
GO:MF	ubiquitin-like protein ligase activity	GO:0061659	0.005484	2.26088	64	1796	24	11339	WBGENE00000500,WBGENE00003917,WBGENE00004320,WBGENE00004381,WBGENE00004768,WBGENE00006734,WBGENE00007009,WBGENE00007574,WBGENE00007626,WBGENE00008330,WBGENE00008871,WBGENE00009477,WBGENE00010923,WBGENE00013538,WBGENE00014031,WBGENE00016156,WBGENE00016158,WBGENE00016326,WBGENE00016888,WBGENE00017373,WBGENE00020423,WBGENE00021842,WBGENE00022069,WBGENE00022358
GO:MF	active transmembrane transporter activity	GO:0022804	0.008935	2.04888	200	1796	54	11339	WBGENE00000019,WBGENE00000020,WBGENE00000023,WBGENE00001303,WBGENE00001812,WBGENE00002162,WBGENE00003153,WBGENE00003735,WBGENE00003831,WBGENE00004063,WBGENE00004736,WBGENE00004901,WBGENE00004904,WBGENE00004906,WBGENE00004908,WBGENE00004909,WBGENE00005025,WBGENE00006439,WBGENE00006463,WBGENE00006504,WBGENE00006519,WBGENE00006917,WBGENE00006918,WBGENE00006919,WBGENE00006920,WBGENE00007060,WBGENE000…
GO:MF	oxidoreductase activity, acting on NAD(P)H, quinone or similar compound as acceptor	GO:0016655	0.010742	1.96892	11	1796	8	11339	WBGENE00003831,WBGENE00006463,WBGENE00009992,WBGENE00012376,WBGENE00016393,WBGENE00020417,WBGENE00020636,WBGENE00021562
GO:MF	GTP binding	GO:0005525	0.012753	1.8944	169	1796	47	11339	WBGENE00000182,WBGENE00000183,WBGENE00000184,WBGENE00000187,WBGENE00000248,WBGENE00000390,WBGENE00001093,WBGENE00001167,WBGENE00001168,WBGENE00001509,WBGENE00001678,WBGENE00004266,WBGENE00004269,WBGENE00004271,WBGENE00004272,WBGENE00004273,WBGENE00004274,WBGENE00004283,WBGENE00004302,WBGENE00004357,WBGENE00004373,WBGENE00006414,WBGENE00006528,WBGENE00006536,WBGENE00006537,WBGENE00006540,WBGENE000…
GO:MF	intramolecular oxidoreductase activity	GO:0016860	0.022174	1.65416	27	1796	13	11339	WBGENE00003962,WBGENE00003964,WBGENE00006601,WBGENE00008624,WBGENE00009435,WBGENE00011239,WBGENE00014013,WBGENE00015168,WBGENE00015483,WBGENE00015752,WBGENE00019460,WBGENE00021296,WBGENE00022836
GO:MF	ubiquitin-like protein ligase binding	GO:0044389	0.035419	1.45077	28	1796	13	11339	WBGENE00000500,WBGENE00000836,WBGENE00000837,WBGENE00000838,WBGENE00002344,WBGENE00004888,WBGENE00006701,WBGENE00006713,WBGENE00006719,WBGENE00006727,WBGENE00006728,WBGENE00006734,WBGENE00015567
GO:MF	guanyl ribonucleotide binding	GO:0032561	0.03741	1.42701	176	1796	47	11339	WBGENE00000182,WBGENE00000183,WBGENE00000184,WBGENE00000187,WBGENE00000248,WBGENE00000390,WBGENE00001093,WBGENE00001167,WBGENE00001168,WBGENE00001509,WBGENE00001678,WBGENE00004266,WBGENE00004269,WBGENE00004271,WBGENE00004272,WBGENE00004273,WBGENE00004274,WBGENE00004283,WBGENE00004302,WBGENE00004357,WBGENE00004373,WBGENE00006414,WBGENE00006528,WBGENE00006536,WBGENE00006537,WBGENE00006540,WBGENE000…
GO:BP	phosphorus metabolic process	GO:0006793	1.19e-57	56.9248	1154	1695	403	10296	WBGENE00000099,WBGENE00000101,WBGENE00000102,WBGENE00000184,WBGENE00000206,WBGENE00000209,WBGENE00000226,WBGENE00000229,WBGENE00000230,WBGENE00000275,WBGENE00000389,WBGENE00000405,WBGENE00000407,WBGENE00000410,WBGENE00000498,WBGENE00000517,WBGENE00000548,WBGENE00000869,WBGENE00000913,WBGENE00001160,WBGENE00001487,WBGENE00001526,WBGENE00001538,WBGENE00001746,WBGENE00002147,WBGENE00002162,WBGENE000…
GO:BP	phosphate-containing compound metabolic process	GO:0006796	4.83e-57	56.3156	1142	1695	399	10296	WBGENE00000099,WBGENE00000101,WBGENE00000102,WBGENE00000184,WBGENE00000206,WBGENE00000209,WBGENE00000226,WBGENE00000229,WBGENE00000230,WBGENE00000275,WBGENE00000389,WBGENE00000405,WBGENE00000407,WBGENE00000410,WBGENE00000498,WBGENE00000517,WBGENE00000548,WBGENE00000869,WBGENE00000913,WBGENE00001160,WBGENE00001487,WBGENE00001526,WBGENE00001538,WBGENE00001746,WBGENE00002147,WBGENE00002162,WBGENE000…
GO:BP	protein modification process	GO:0036211	5.53e-56	55.2569	1325	1695	439	10296	WBGENE00000099,WBGENE00000102,WBGENE00000226,WBGENE00000259,WBGENE00000270,WBGENE00000275,WBGENE00000389,WBGENE00000405,WBGENE00000407,WBGENE00000410,WBGENE00000498,WBGENE00000500,WBGENE00000517,WBGENE00000548,WBGENE00000879,WBGENE00000885,WBGENE00000913,WBGENE00001112,WBGENE00001160,WBGENE00001426,WBGENE00001427,WBGENE00001431,WBGENE00001487,WBGENE00001505,WBGENE00001511,WBGENE00001526,WBGENE000…
GO:BP	cellular protein modification process	GO:0006464	5.53e-56	55.2569	1325	1695	439	10296	WBGENE00000099,WBGENE00000102,WBGENE00000226,WBGENE00000259,WBGENE00000270,WBGENE00000275,WBGENE00000389,WBGENE00000405,WBGENE00000407,WBGENE00000410,WBGENE00000498,WBGENE00000500,WBGENE00000517,WBGENE00000548,WBGENE00000879,WBGENE00000885,WBGENE00000913,WBGENE00001112,WBGENE00001160,WBGENE00001426,WBGENE00001427,WBGENE00001431,WBGENE00001487,WBGENE00001505,WBGENE00001511,WBGENE00001526,WBGENE000…
GO:BP	macromolecule modification	GO:0043412	8.67e-49	48.0621	1440	1695	449	10296	WBGENE00000099,WBGENE00000102,WBGENE00000226,WBGENE00000259,WBGENE00000270,WBGENE00000275,WBGENE00000389,WBGENE00000392,WBGENE00000405,WBGENE00000407,WBGENE00000410,WBGENE00000498,WBGENE00000500,WBGENE00000517,WBGENE00000548,WBGENE00000879,WBGENE00000885,WBGENE00000913,WBGENE00001112,WBGENE00001160,WBGENE00001426,WBGENE00001427,WBGENE00001431,WBGENE00001487,WBGENE00001505,WBGENE00001511,WBGENE000…
GO:BP	protein dephosphorylation	GO:0006470	7.88e-32	31.1033	188	1695	104	10296	WBGENE00000389,WBGENE00000548,WBGENE00000913,WBGENE00004084,WBGENE00004086,WBGENE00004215,WBGENE00007354,WBGENE00007415,WBGENE00007554,WBGENE00007610,WBGENE00007697,WBGENE00007699,WBGENE00007700,WBGENE00007763,WBGENE00008124,WBGENE00008166,WBGENE00008661,WBGENE00009054,WBGENE00009079,WBGENE00009101,WBGENE00009129,WBGENE00009207,WBGENE00009401,WBGENE00009492,WBGENE00009548,WBGENE00009605,WBGENE000…
GO:BP	dephosphorylation	GO:0016311	4.1e-25	24.3876	260	1695	117	10296	WBGENE00000389,WBGENE00000548,WBGENE00000913,WBGENE00004084,WBGENE00004086,WBGENE00004215,WBGENE00007354,WBGENE00007415,WBGENE00007548,WBGENE00007554,WBGENE00007610,WBGENE00007697,WBGENE00007699,WBGENE00007700,WBGENE00007763,WBGENE00007912,WBGENE00008124,WBGENE00008166,WBGENE00008661,WBGENE00008765,WBGENE00008801,WBGENE00008802,WBGENE00009054,WBGENE00009079,WBGENE00009101,WBGENE00009129,WBGENE000…
GO:BP	peptidyl-tyrosine dephosphorylation	GO:0035335	1.03e-23	22.9875	90	1695	60	10296	WBGENE00000389,WBGENE00000548,WBGENE00004084,WBGENE00004215,WBGENE00007415,WBGENE00007610,WBGENE00007697,WBGENE00008661,WBGENE00009129,WBGENE00009207,WBGENE00009401,WBGENE00009492,WBGENE00009548,WBGENE00009605,WBGENE00010072,WBGENE00010136,WBGENE00010634,WBGENE00010636,WBGENE00010869,WBGENE00010876,WBGENE00011918,WBGENE00012138,WBGENE00012173,WBGENE00012689,WBGENE00013304,WBGENE00013388,WBGENE000…
GO:BP	peptidyl-serine phosphorylation	GO:0018105	2.08e-23	22.6823	115	1695	69	10296	WBGENE00003403,WBGENE00004960,WBGENE00006579,WBGENE00007049,WBGENE00007269,WBGENE00007305,WBGENE00007335,WBGENE00007448,WBGENE00007563,WBGENE00007777,WBGENE00007791,WBGENE00008235,WBGENE00008423,WBGENE00008662,WBGENE00009115,WBGENE00009402,WBGENE00010366,WBGENE00010719,WBGENE00010874,WBGENE00010883,WBGENE00011191,WBGENE00011466,WBGENE00012169,WBGENE00012307,WBGENE00012637,WBGENE00013978,WBGENE000…
GO:BP	peptidyl-serine modification	GO:0018209	4.32e-23	22.3642	116	1695	69	10296	WBGENE00003403,WBGENE00004960,WBGENE00006579,WBGENE00007049,WBGENE00007269,WBGENE00007305,WBGENE00007335,WBGENE00007448,WBGENE00007563,WBGENE00007777,WBGENE00007791,WBGENE00008235,WBGENE00008423,WBGENE00008662,WBGENE00009115,WBGENE00009402,WBGENE00010366,WBGENE00010719,WBGENE00010874,WBGENE00010883,WBGENE00011191,WBGENE00011466,WBGENE00012169,WBGENE00012307,WBGENE00012637,WBGENE00013978,WBGENE000…
GO:BP	phosphorylation	GO:0016310	4.94e-23	22.306	629	1695	207	10296	WBGENE00000099,WBGENE00000101,WBGENE00000102,WBGENE00000226,WBGENE00000275,WBGENE00000405,WBGENE00000407,WBGENE00000410,WBGENE00000498,WBGENE00000517,WBGENE00001160,WBGENE00001487,WBGENE00001526,WBGENE00001538,WBGENE00001746,WBGENE00002147,WBGENE00002162,WBGENE00002191,WBGENE00002193,WBGENE00002198,WBGENE00002201,WBGENE00002202,WBGENE00002204,WBGENE00002206,WBGENE00002208,WBGENE00002238,WBGENE000…
GO:BP	macromolecule localization	GO:0033036	3.03e-22	21.519	689	1695	219	10296	WBGENE00000019,WBGENE00000020,WBGENE00000023,WBGENE00000097,WBGENE00000121,WBGENE00000122,WBGENE00000150,WBGENE00000158,WBGENE00000160,WBGENE00000183,WBGENE00000184,WBGENE00000585,WBGENE00001047,WBGENE00001153,WBGENE00001303,WBGENE00001333,WBGENE00001558,WBGENE00001662,WBGENE00001829,WBGENE00001830,WBGENE00002064,WBGENE00002072,WBGENE00002074,WBGENE00002219,WBGENE00002263,WBGENE00002297,WBGENE000…
GO:BP	peptidyl-amino acid modification	GO:0018193	1.6e-21	20.7953	395	1695	147	10296	WBGENE00000879,WBGENE00000885,WBGENE00001426,WBGENE00001427,WBGENE00001431,WBGENE00002193,WBGENE00002198,WBGENE00002204,WBGENE00002206,WBGENE00002208,WBGENE00002694,WBGENE00003150,WBGENE00003403,WBGENE00004781,WBGENE00004782,WBGENE00004888,WBGENE00004960,WBGENE00004962,WBGENE00004964,WBGENE00006382,WBGENE00006579,WBGENE00006736,WBGENE00007030,WBGENE00007049,WBGENE00007269,WBGENE00007270,WBGENE000…
GO:BP	cellular localization	GO:0051641	2.46e-21	20.6097	690	1695	217	10296	WBGENE00000097,WBGENE00000101,WBGENE00000121,WBGENE00000122,WBGENE00000150,WBGENE00000158,WBGENE00000160,WBGENE00000183,WBGENE00000184,WBGENE00000230,WBGENE00000419,WBGENE00000869,WBGENE00001007,WBGENE00001017,WBGENE00001047,WBGENE00001303,WBGENE00001333,WBGENE00001662,WBGENE00001996,WBGENE00002036,WBGENE00002070,WBGENE00002072,WBGENE00002074,WBGENE00002214,WBGENE00002219,WBGENE00002845,WBGENE000…
GO:BP	ATP metabolic process	GO:0046034	5.81e-21	20.2357	79	1695	53	10296	WBGENE00000206,WBGENE00000209,WBGENE00000229,WBGENE00000230,WBGENE00000869,WBGENE00002162,WBGENE00003061,WBGENE00003831,WBGENE00004959,WBGENE00006463,WBGENE00006601,WBGENE00006768,WBGENE00006919,WBGENE00007385,WBGENE00007880,WBGENE00008230,WBGENE00008780,WBGENE00009051,WBGENE00009126,WBGENE00009161,WBGENE00009294,WBGENE00009739,WBGENE00009992,WBGENE00010419,WBGENE00011015,WBGENE00011273,WBGENE000…
GO:BP	protein phosphorylation	GO:0006468	8.82e-21	20.0547	511	1695	174	10296	WBGENE00000099,WBGENE00000102,WBGENE00000226,WBGENE00000275,WBGENE00000405,WBGENE00000407,WBGENE00000410,WBGENE00000498,WBGENE00000517,WBGENE00001160,WBGENE00001487,WBGENE00001526,WBGENE00001538,WBGENE00001746,WBGENE00002147,WBGENE00002162,WBGENE00002191,WBGENE00002193,WBGENE00002198,WBGENE00002201,WBGENE00002202,WBGENE00002204,WBGENE00002206,WBGENE00002208,WBGENE00002238,WBGENE00002240,WBGENE000…
GO:BP	establishment of localization in cell	GO:0051649	3.55e-20	19.4503	542	1695	180	10296	WBGENE00000097,WBGENE00000101,WBGENE00000121,WBGENE00000122,WBGENE00000150,WBGENE00000158,WBGENE00000160,WBGENE00000183,WBGENE00000184,WBGENE00000230,WBGENE00000419,WBGENE00000869,WBGENE00001007,WBGENE00001017,WBGENE00001047,WBGENE00001303,WBGENE00001662,WBGENE00002036,WBGENE00002070,WBGENE00002072,WBGENE00002074,WBGENE00002214,WBGENE00002845,WBGENE00003060,WBGENE00003576,WBGENE00003792,WBGENE000…
GO:BP	aerobic respiration	GO:0009060	2.56e-19	18.591	63	1695	45	10296	WBGENE00000041,WBGENE00000230,WBGENE00000869,WBGENE00001503,WBGENE00002162,WBGENE00003061,WBGENE00003162,WBGENE00003225,WBGENE00003831,WBGENE00006433,WBGENE00006463,WBGENE00007880,WBGENE00009051,WBGENE00009161,WBGENE00009294,WBGENE00009440,WBGENE00009664,WBGENE00009739,WBGENE00009992,WBGENE00010317,WBGENE00011273,WBGENE00012354,WBGENE00012553,WBGENE00013308,WBGENE00013406,WBGENE00014086,WBGENE000…
GO:BP	intracellular transport	GO:0046907	6.42e-19	18.1926	445	1695	154	10296	WBGENE00000097,WBGENE00000101,WBGENE00000121,WBGENE00000122,WBGENE00000150,WBGENE00000158,WBGENE00000160,WBGENE00000183,WBGENE00000184,WBGENE00000230,WBGENE00000869,WBGENE00001007,WBGENE00001017,WBGENE00001047,WBGENE00001303,WBGENE00001662,WBGENE00002036,WBGENE00002070,WBGENE00002072,WBGENE00002074,WBGENE00003792,WBGENE00003793,WBGENE00003796,WBGENE00003805,WBGENE00003806,WBGENE00003905,WBGENE000…
GO:BP	organonitrogen compound metabolic process	GO:1901564	8.1e-19	18.0913	3671	1695	778	10296	WBGENE00000097,WBGENE00000099,WBGENE00000102,WBGENE00000112,WBGENE00000144,WBGENE00000155,WBGENE00000206,WBGENE00000209,WBGENE00000226,WBGENE00000229,WBGENE00000230,WBGENE00000254,WBGENE00000259,WBGENE00000270,WBGENE00000275,WBGENE00000376,WBGENE00000389,WBGENE00000392,WBGENE00000405,WBGENE00000407,WBGENE00000410,WBGENE00000498,WBGENE00000500,WBGENE00000517,WBGENE00000534,WBGENE00000543,WBGENE000…
GO:BP	ubiquitin-dependent protein catabolic process	GO:0006511	1.91e-18	17.7188	213	1695	93	10296	WBGENE00000097,WBGENE00000144,WBGENE00000500,WBGENE00000836,WBGENE00000837,WBGENE00000838,WBGENE00002344,WBGENE00003917,WBGENE00003922,WBGENE00003923,WBGENE00003924,WBGENE00003925,WBGENE00003926,WBGENE00003927,WBGENE00003928,WBGENE00003947,WBGENE00004109,WBGENE00004320,WBGENE00004381,WBGENE00004458,WBGENE00004461,WBGENE00004464,WBGENE00004465,WBGENE00004504,WBGENE00004506,WBGENE00004759,WBGENE000…
GO:BP	modification-dependent protein catabolic process	GO:0019941	2.29e-18	17.6395	217	1695	94	10296	WBGENE00000097,WBGENE00000144,WBGENE00000500,WBGENE00000836,WBGENE00000837,WBGENE00000838,WBGENE00002344,WBGENE00003917,WBGENE00003922,WBGENE00003923,WBGENE00003924,WBGENE00003925,WBGENE00003926,WBGENE00003927,WBGENE00003928,WBGENE00003947,WBGENE00004109,WBGENE00004320,WBGENE00004381,WBGENE00004458,WBGENE00004461,WBGENE00004464,WBGENE00004465,WBGENE00004504,WBGENE00004506,WBGENE00004759,WBGENE000…
GO:BP	modification-dependent macromolecule catabolic process	GO:0043632	5.9e-18	17.229	223	1695	95	10296	WBGENE00000097,WBGENE00000144,WBGENE00000500,WBGENE00000836,WBGENE00000837,WBGENE00000838,WBGENE00002344,WBGENE00003917,WBGENE00003922,WBGENE00003923,WBGENE00003924,WBGENE00003925,WBGENE00003926,WBGENE00003927,WBGENE00003928,WBGENE00003947,WBGENE00004109,WBGENE00004320,WBGENE00004381,WBGENE00004458,WBGENE00004461,WBGENE00004464,WBGENE00004465,WBGENE00004504,WBGENE00004506,WBGENE00004759,WBGENE000…
GO:BP	organic substance transport	GO:0071702	1.05e-17	16.977	678	1695	205	10296	WBGENE00000007,WBGENE00000019,WBGENE00000020,WBGENE00000023,WBGENE00000097,WBGENE00000121,WBGENE00000122,WBGENE00000150,WBGENE00000158,WBGENE00000160,WBGENE00000169,WBGENE00000171,WBGENE00000183,WBGENE00000184,WBGENE00000585,WBGENE00001047,WBGENE00001303,WBGENE00001558,WBGENE00001662,WBGENE00001812,WBGENE00002072,WBGENE00002074,WBGENE00002263,WBGENE00003792,WBGENE00003793,WBGENE00003806,WBGENE000…
GO:BP	cellular protein catabolic process	GO:0044257	1.85e-17	16.7318	278	1695	109	10296	WBGENE00000097,WBGENE00000144,WBGENE00000155,WBGENE00000500,WBGENE00000836,WBGENE00000837,WBGENE00000838,WBGENE00002344,WBGENE00003917,WBGENE00003922,WBGENE00003923,WBGENE00003924,WBGENE00003925,WBGENE00003926,WBGENE00003927,WBGENE00003928,WBGENE00003947,WBGENE00003948,WBGENE00003950,WBGENE00003951,WBGENE00003952,WBGENE00003953,WBGENE00004109,WBGENE00004320,WBGENE00004381,WBGENE00004458,WBGENE000…
GO:BP	proteolysis involved in cellular protein catabolic process	GO:0051603	4.03e-17	16.3943	269	1695	106	10296	WBGENE00000097,WBGENE00000144,WBGENE00000155,WBGENE00000500,WBGENE00000836,WBGENE00000837,WBGENE00000838,WBGENE00002344,WBGENE00003917,WBGENE00003922,WBGENE00003923,WBGENE00003924,WBGENE00003925,WBGENE00003926,WBGENE00003927,WBGENE00003928,WBGENE00003947,WBGENE00003948,WBGENE00003950,WBGENE00003951,WBGENE00003952,WBGENE00003953,WBGENE00004109,WBGENE00004320,WBGENE00004381,WBGENE00004458,WBGENE000…
GO:BP	cellular respiration	GO:0045333	1.12e-16	15.9518	72	1695	46	10296	WBGENE00000041,WBGENE00000230,WBGENE00000869,WBGENE00001503,WBGENE00002162,WBGENE00003061,WBGENE00003162,WBGENE00003225,WBGENE00003831,WBGENE00006433,WBGENE00006463,WBGENE00007880,WBGENE00009051,WBGENE00009161,WBGENE00009294,WBGENE00009440,WBGENE00009664,WBGENE00009739,WBGENE00009992,WBGENE00010317,WBGENE00011273,WBGENE00012354,WBGENE00012553,WBGENE00012780,WBGENE00013308,WBGENE00013406,WBGENE000…
GO:BP	protein localization	GO:0008104	1.13e-16	15.9466	548	1695	173	10296	WBGENE00000097,WBGENE00000150,WBGENE00000158,WBGENE00000160,WBGENE00000183,WBGENE00000184,WBGENE00000585,WBGENE00001047,WBGENE00001303,WBGENE00001333,WBGENE00001558,WBGENE00001662,WBGENE00001829,WBGENE00001830,WBGENE00002064,WBGENE00002072,WBGENE00002074,WBGENE00002219,WBGENE00002297,WBGENE00003025,WBGENE00003777,WBGENE00003792,WBGENE00003793,WBGENE00003806,WBGENE00003818,WBGENE00003917,WBGENE000…
GO:BP	organic substance catabolic process	GO:1901575	1.54e-16	15.8137	715	1695	210	10296	WBGENE00000097,WBGENE00000112,WBGENE00000144,WBGENE00000155,WBGENE00000376,WBGENE00000392,WBGENE00000500,WBGENE00000836,WBGENE00000837,WBGENE00000838,WBGENE00000939,WBGENE00001153,WBGENE00002183,WBGENE00002344,WBGENE00002845,WBGENE00003906,WBGENE00003917,WBGENE00003922,WBGENE00003923,WBGENE00003924,WBGENE00003925,WBGENE00003926,WBGENE00003927,WBGENE00003928,WBGENE00003947,WBGENE00003948,WBGENE000…
GO:BP	protein catabolic process	GO:0030163	1.63e-16	15.7871	316	1695	117	10296	WBGENE00000097,WBGENE00000144,WBGENE00000155,WBGENE00000500,WBGENE00000836,WBGENE00000837,WBGENE00000838,WBGENE00002344,WBGENE00003917,WBGENE00003922,WBGENE00003923,WBGENE00003924,WBGENE00003925,WBGENE00003926,WBGENE00003927,WBGENE00003928,WBGENE00003947,WBGENE00003948,WBGENE00003950,WBGENE00003951,WBGENE00003952,WBGENE00003953,WBGENE00004109,WBGENE00004320,WBGENE00004381,WBGENE00004458,WBGENE000…
GO:BP	cellular protein metabolic process	GO:0044267	4.7e-16	15.3277	2822	1695	616	10296	WBGENE00000097,WBGENE00000099,WBGENE00000102,WBGENE00000144,WBGENE00000155,WBGENE00000226,WBGENE00000259,WBGENE00000270,WBGENE00000275,WBGENE00000376,WBGENE00000389,WBGENE00000405,WBGENE00000407,WBGENE00000410,WBGENE00000498,WBGENE00000500,WBGENE00000517,WBGENE00000534,WBGENE00000548,WBGENE00000770,WBGENE00000771,WBGENE00000800,WBGENE00000836,WBGENE00000837,WBGENE00000838,WBGENE00000879,WBGENE000…
GO:BP	nitrogen compound transport	GO:0071705	1.24e-15	14.9063	542	1695	169	10296	WBGENE00000007,WBGENE00000097,WBGENE00000121,WBGENE00000122,WBGENE00000150,WBGENE00000158,WBGENE00000160,WBGENE00000183,WBGENE00000184,WBGENE00000585,WBGENE00001047,WBGENE00001303,WBGENE00001558,WBGENE00001662,WBGENE00001812,WBGENE00002072,WBGENE00002074,WBGENE00003792,WBGENE00003793,WBGENE00003806,WBGENE00003818,WBGENE00004109,WBGENE00004266,WBGENE00004272,WBGENE00004274,WBGENE00004357,WBGENE000…
GO:BP	cellular process	GO:0009987	1.75e-15	14.7557	8891	1695	1569	10296	WBGENE00000007,WBGENE00000019,WBGENE00000020,WBGENE00000023,WBGENE00000041,WBGENE00000097,WBGENE00000099,WBGENE00000101,WBGENE00000102,WBGENE00000112,WBGENE00000121,WBGENE00000122,WBGENE00000123,WBGENE00000144,WBGENE00000150,WBGENE00000151,WBGENE00000155,WBGENE00000158,WBGENE00000160,WBGENE00000169,WBGENE00000171,WBGENE00000183,WBGENE00000184,WBGENE00000198,WBGENE00000206,WBGENE00000209,WBGENE000…
GO:BP	generation of precursor metabolites and energy	GO:0006091	2.48e-15	14.6048	124	1695	62	10296	WBGENE00000041,WBGENE00000230,WBGENE00000869,WBGENE00001503,WBGENE00002162,WBGENE00002855,WBGENE00003061,WBGENE00003162,WBGENE00003225,WBGENE00003831,WBGENE00006433,WBGENE00006463,WBGENE00006601,WBGENE00007330,WBGENE00007880,WBGENE00008230,WBGENE00008780,WBGENE00009051,WBGENE00009126,WBGENE00009161,WBGENE00009187,WBGENE00009294,WBGENE00009440,WBGENE00009583,WBGENE00009664,WBGENE00009739,WBGENE000…
GO:BP	organelle organization	GO:0006996	2.57e-15	14.5907	982	1695	263	10296	WBGENE00000226,WBGENE00000228,WBGENE00000248,WBGENE00000257,WBGENE00000275,WBGENE00000293,WBGENE00000419,WBGENE00000500,WBGENE00000502,WBGENE00000549,WBGENE00000585,WBGENE00000875,WBGENE00000938,WBGENE00001007,WBGENE00001016,WBGENE00001017,WBGENE00001027,WBGENE00001092,WBGENE00001093,WBGENE00001259,WBGENE00001333,WBGENE00001424,WBGENE00001443,WBGENE00001488,WBGENE00001491,WBGENE00001509,WBGENE000…
GO:BP	establishment of protein localization	GO:0045184	6.26e-15	14.2036	374	1695	128	10296	WBGENE00000097,WBGENE00000150,WBGENE00000158,WBGENE00000160,WBGENE00000183,WBGENE00000184,WBGENE00000585,WBGENE00001047,WBGENE00001303,WBGENE00001558,WBGENE00001662,WBGENE00002072,WBGENE00002074,WBGENE00003793,WBGENE00003806,WBGENE00003818,WBGENE00004109,WBGENE00004266,WBGENE00004272,WBGENE00004274,WBGENE00004373,WBGENE00004754,WBGENE00004755,WBGENE00004756,WBGENE00004964,WBGENE00004975,WBGENE000…
GO:BP	protein transport	GO:0015031	6.68e-15	14.1753	366	1695	126	10296	WBGENE00000097,WBGENE00000150,WBGENE00000158,WBGENE00000160,WBGENE00000183,WBGENE00000184,WBGENE00000585,WBGENE00001047,WBGENE00001303,WBGENE00001558,WBGENE00001662,WBGENE00002072,WBGENE00002074,WBGENE00003793,WBGENE00003806,WBGENE00003818,WBGENE00004109,WBGENE00004266,WBGENE00004272,WBGENE00004274,WBGENE00004373,WBGENE00004754,WBGENE00004755,WBGENE00004756,WBGENE00004964,WBGENE00004975,WBGENE000…
GO:BP	organonitrogen compound catabolic process	GO:1901565	1.11e-14	13.9552	431	1695	141	10296	WBGENE00000097,WBGENE00000112,WBGENE00000144,WBGENE00000155,WBGENE00000392,WBGENE00000500,WBGENE00000836,WBGENE00000837,WBGENE00000838,WBGENE00002344,WBGENE00003917,WBGENE00003922,WBGENE00003923,WBGENE00003924,WBGENE00003925,WBGENE00003926,WBGENE00003927,WBGENE00003928,WBGENE00003947,WBGENE00003948,WBGENE00003950,WBGENE00003951,WBGENE00003952,WBGENE00003953,WBGENE00004109,WBGENE00004320,WBGENE000…
GO:BP	cellular protein localization	GO:0034613	2.04e-14	13.6895	383	1695	129	10296	WBGENE00000097,WBGENE00000150,WBGENE00000158,WBGENE00000160,WBGENE00000183,WBGENE00000184,WBGENE00001047,WBGENE00001303,WBGENE00001333,WBGENE00001662,WBGENE00002072,WBGENE00002074,WBGENE00002219,WBGENE00003025,WBGENE00003792,WBGENE00003793,WBGENE00003806,WBGENE00004101,WBGENE00004109,WBGENE00004266,WBGENE00004272,WBGENE00004373,WBGENE00004738,WBGENE00004754,WBGENE00004755,WBGENE00004756,WBGENE000…
GO:BP	Golgi vesicle transport	GO:0048193	2.59e-14	13.587	100	1695	53	10296	WBGENE00000158,WBGENE00000464,WBGENE00002070,WBGENE00003806,WBGENE00003905,WBGENE00004272,WBGENE00004754,WBGENE00004755,WBGENE00004756,WBGENE00006373,WBGENE00006565,WBGENE00008687,WBGENE00008990,WBGENE00009336,WBGENE00009498,WBGENE00009654,WBGENE00009783,WBGENE00009829,WBGENE00010178,WBGENE00010333,WBGENE00010427,WBGENE00010496,WBGENE00010670,WBGENE00010699,WBGENE00010713,WBGENE00011338,WBGENE000…
GO:BP	cellular macromolecule localization	GO:0070727	2.6e-14	13.5854	384	1695	129	10296	WBGENE00000097,WBGENE00000150,WBGENE00000158,WBGENE00000160,WBGENE00000183,WBGENE00000184,WBGENE00001047,WBGENE00001303,WBGENE00001333,WBGENE00001662,WBGENE00002072,WBGENE00002074,WBGENE00002219,WBGENE00003025,WBGENE00003792,WBGENE00003793,WBGENE00003806,WBGENE00004101,WBGENE00004109,WBGENE00004266,WBGENE00004272,WBGENE00004373,WBGENE00004738,WBGENE00004754,WBGENE00004755,WBGENE00004756,WBGENE000…
GO:BP	energy derivation by oxidation of organic compounds	GO:0015980	2.75e-14	13.5604	91	1695	50	10296	WBGENE00000041,WBGENE00000230,WBGENE00000869,WBGENE00001503,WBGENE00002162,WBGENE00003061,WBGENE00003162,WBGENE00003225,WBGENE00003831,WBGENE00006433,WBGENE00006463,WBGENE00007880,WBGENE00009051,WBGENE00009161,WBGENE00009294,WBGENE00009440,WBGENE00009583,WBGENE00009664,WBGENE00009739,WBGENE00009992,WBGENE00010317,WBGENE00010665,WBGENE00011273,WBGENE00012354,WBGENE00012553,WBGENE00012780,WBGENE000…
GO:BP	macromolecule catabolic process	GO:0009057	8.69e-14	13.061	436	1695	140	10296	WBGENE00000097,WBGENE00000144,WBGENE00000155,WBGENE00000376,WBGENE00000500,WBGENE00000836,WBGENE00000837,WBGENE00000838,WBGENE00000939,WBGENE00002344,WBGENE00002845,WBGENE00003917,WBGENE00003922,WBGENE00003923,WBGENE00003924,WBGENE00003925,WBGENE00003926,WBGENE00003927,WBGENE00003928,WBGENE00003947,WBGENE00003948,WBGENE00003950,WBGENE00003951,WBGENE00003952,WBGENE00003953,WBGENE00004109,WBGENE000…
GO:BP	cellular macromolecule metabolic process	GO:0044260	9.03e-14	13.0445	3256	1695	682	10296	WBGENE00000097,WBGENE00000099,WBGENE00000102,WBGENE00000144,WBGENE00000151,WBGENE00000155,WBGENE00000226,WBGENE00000259,WBGENE00000270,WBGENE00000275,WBGENE00000376,WBGENE00000389,WBGENE00000405,WBGENE00000407,WBGENE00000410,WBGENE00000498,WBGENE00000500,WBGENE00000517,WBGENE00000534,WBGENE00000548,WBGENE00000770,WBGENE00000771,WBGENE00000800,WBGENE00000836,WBGENE00000837,WBGENE00000838,WBGENE000…
GO:BP	mitochondrial ATP synthesis coupled electron transport	GO:0042775	1.25e-13	12.9029	35	1695	28	10296	WBGENE00000869,WBGENE00002162,WBGENE00003061,WBGENE00003831,WBGENE00006463,WBGENE00007880,WBGENE00009051,WBGENE00009161,WBGENE00009294,WBGENE00009739,WBGENE00009992,WBGENE00012354,WBGENE00012553,WBGENE00013308,WBGENE00013406,WBGENE00014086,WBGENE00015755,WBGENE00015810,WBGENE00016392,WBGENE00016393,WBGENE00019007,WBGENE00019401,WBGENE00020181,WBGENE00020417,WBGENE00020636,WBGENE00021562,WBGENE000…
GO:BP	cellular macromolecule catabolic process	GO:0044265	3.93e-13	12.4055	400	1695	130	10296	WBGENE00000097,WBGENE00000144,WBGENE00000155,WBGENE00000376,WBGENE00000500,WBGENE00000836,WBGENE00000837,WBGENE00000838,WBGENE00000939,WBGENE00002344,WBGENE00002845,WBGENE00003917,WBGENE00003922,WBGENE00003923,WBGENE00003924,WBGENE00003925,WBGENE00003926,WBGENE00003927,WBGENE00003928,WBGENE00003947,WBGENE00003948,WBGENE00003950,WBGENE00003951,WBGENE00003952,WBGENE00003953,WBGENE00004109,WBGENE000…
GO:BP	ATP synthesis coupled electron transport	GO:0042773	4.75e-13	12.3237	36	1695	28	10296	WBGENE00000869,WBGENE00002162,WBGENE00003061,WBGENE00003831,WBGENE00006463,WBGENE00007880,WBGENE00009051,WBGENE00009161,WBGENE00009294,WBGENE00009739,WBGENE00009992,WBGENE00012354,WBGENE00012553,WBGENE00013308,WBGENE00013406,WBGENE00014086,WBGENE00015755,WBGENE00015810,WBGENE00016392,WBGENE00016393,WBGENE00019007,WBGENE00019401,WBGENE00020181,WBGENE00020417,WBGENE00020636,WBGENE00021562,WBGENE000…
GO:BP	aerobic electron transport chain	GO:0019646	4.75e-13	12.3237	36	1695	28	10296	WBGENE00000869,WBGENE00002162,WBGENE00003061,WBGENE00003831,WBGENE00006463,WBGENE00007880,WBGENE00009051,WBGENE00009161,WBGENE00009294,WBGENE00009739,WBGENE00009992,WBGENE00012354,WBGENE00012553,WBGENE00013308,WBGENE00013406,WBGENE00014086,WBGENE00015755,WBGENE00015810,WBGENE00016392,WBGENE00016393,WBGENE00019007,WBGENE00019401,WBGENE00020181,WBGENE00020417,WBGENE00020636,WBGENE00021562,WBGENE000…
GO:BP	oxidative phosphorylation	GO:0006119	5.18e-13	12.2858	43	1695	31	10296	WBGENE00000230,WBGENE00000869,WBGENE00002162,WBGENE00003061,WBGENE00003831,WBGENE00006463,WBGENE00007880,WBGENE00009051,WBGENE00009161,WBGENE00009294,WBGENE00009739,WBGENE00009992,WBGENE00011273,WBGENE00012354,WBGENE00012553,WBGENE00013308,WBGENE00013406,WBGENE00014086,WBGENE00015755,WBGENE00015810,WBGENE00016392,WBGENE00016393,WBGENE00017982,WBGENE00019007,WBGENE00019401,WBGENE00020181,WBGENE000…
GO:BP	vesicle-mediated transport	GO:0016192	9.16e-13	12.038	391	1695	127	10296	WBGENE00000101,WBGENE00000150,WBGENE00000158,WBGENE00000160,WBGENE00000183,WBGENE00000184,WBGENE00000419,WBGENE00000464,WBGENE00001558,WBGENE00002070,WBGENE00003060,WBGENE00003153,WBGENE00003806,WBGENE00003818,WBGENE00003905,WBGENE00004109,WBGENE00004205,WBGENE00004271,WBGENE00004272,WBGENE00004274,WBGENE00004373,WBGENE00004753,WBGENE00004754,WBGENE00004755,WBGENE00004756,WBGENE00004775,WBGENE000…
GO:BP	membrane organization	GO:0061024	1.24e-12	11.906	169	1695	71	10296	WBGENE00000419,WBGENE00000875,WBGENE00001027,WBGENE00001414,WBGENE00001662,WBGENE00003806,WBGENE00004205,WBGENE00004271,WBGENE00004272,WBGENE00004274,WBGENE00004754,WBGENE00004755,WBGENE00004756,WBGENE00004899,WBGENE00004958,WBGENE00004964,WBGENE00006311,WBGENE00006373,WBGENE00006491,WBGENE00006565,WBGENE00006572,WBGENE00006805,WBGENE00007144,WBGENE00007696,WBGENE00008164,WBGENE00008856,WBGENE000…
GO:BP	proteasomal protein catabolic process	GO:0010498	1.74e-12	11.7591	152	1695	66	10296	WBGENE00000097,WBGENE00000144,WBGENE00000500,WBGENE00003917,WBGENE00003926,WBGENE00003947,WBGENE00003948,WBGENE00003953,WBGENE00004381,WBGENE00004458,WBGENE00004461,WBGENE00004464,WBGENE00004504,WBGENE00004506,WBGENE00004759,WBGENE00004768,WBGENE00004807,WBGENE00004808,WBGENE00006701,WBGENE00006703,WBGENE00006704,WBGENE00006707,WBGENE00006715,WBGENE00006724,WBGENE00006733,WBGENE00006734,WBGENE000…
GO:BP	electron transport chain	GO:0022900	2.19e-12	11.6594	52	1695	34	10296	WBGENE00000869,WBGENE00002162,WBGENE00002855,WBGENE00003061,WBGENE00003225,WBGENE00003831,WBGENE00006433,WBGENE00006463,WBGENE00007880,WBGENE00009051,WBGENE00009161,WBGENE00009187,WBGENE00009294,WBGENE00009739,WBGENE00009992,WBGENE00012354,WBGENE00012553,WBGENE00012780,WBGENE00013308,WBGENE00013406,WBGENE00014086,WBGENE00015755,WBGENE00015810,WBGENE00016392,WBGENE00016393,WBGENE00017734,WBGENE000…
GO:BP	intracellular protein transport	GO:0006886	2.67e-12	11.5733	255	1695	93	10296	WBGENE00000097,WBGENE00000150,WBGENE00000158,WBGENE00000160,WBGENE00000183,WBGENE00000184,WBGENE00001047,WBGENE00001303,WBGENE00001662,WBGENE00002072,WBGENE00002074,WBGENE00003793,WBGENE00003806,WBGENE00004109,WBGENE00004266,WBGENE00004754,WBGENE00004755,WBGENE00004756,WBGENE00004964,WBGENE00004975,WBGENE00006373,WBGENE00006572,WBGENE00007637,WBGENE00007683,WBGENE00007686,WBGENE00007696,WBGENE000…
GO:BP	protein metabolic process	GO:0019538	5.54e-12	11.2564	3200	1695	663	10296	WBGENE00000097,WBGENE00000099,WBGENE00000102,WBGENE00000144,WBGENE00000155,WBGENE00000226,WBGENE00000254,WBGENE00000259,WBGENE00000270,WBGENE00000275,WBGENE00000376,WBGENE00000389,WBGENE00000405,WBGENE00000407,WBGENE00000410,WBGENE00000498,WBGENE00000500,WBGENE00000517,WBGENE00000534,WBGENE00000543,WBGENE00000544,WBGENE00000548,WBGENE00000770,WBGENE00000771,WBGENE00000800,WBGENE00000836,WBGENE000…
GO:BP	respiratory electron transport chain	GO:0022904	6.43e-12	11.1919	43	1695	30	10296	WBGENE00000869,WBGENE00002162,WBGENE00003061,WBGENE00003831,WBGENE00006433,WBGENE00006463,WBGENE00007880,WBGENE00009051,WBGENE00009161,WBGENE00009294,WBGENE00009739,WBGENE00009992,WBGENE00012354,WBGENE00012553,WBGENE00012780,WBGENE00013308,WBGENE00013406,WBGENE00014086,WBGENE00015755,WBGENE00015810,WBGENE00016392,WBGENE00016393,WBGENE00019007,WBGENE00019401,WBGENE00020181,WBGENE00020417,WBGENE000…
GO:BP	catabolic process	GO:0009056	1.61e-11	10.7919	845	1695	222	10296	WBGENE00000097,WBGENE00000112,WBGENE00000144,WBGENE00000155,WBGENE00000376,WBGENE00000392,WBGENE00000500,WBGENE00000836,WBGENE00000837,WBGENE00000838,WBGENE00000939,WBGENE00001153,WBGENE00001424,WBGENE00002183,WBGENE00002344,WBGENE00002583,WBGENE00002845,WBGENE00003906,WBGENE00003917,WBGENE00003922,WBGENE00003923,WBGENE00003924,WBGENE00003925,WBGENE00003926,WBGENE00003927,WBGENE00003928,WBGENE000…
GO:BP	cellular component organization	GO:0016043	1.85e-11	10.7331	1578	1695	366	10296	WBGENE00000226,WBGENE00000228,WBGENE00000248,WBGENE00000257,WBGENE00000275,WBGENE00000293,WBGENE00000419,WBGENE00000500,WBGENE00000502,WBGENE00000534,WBGENE00000549,WBGENE00000585,WBGENE00000875,WBGENE00000938,WBGENE00001007,WBGENE00001016,WBGENE00001017,WBGENE00001027,WBGENE00001092,WBGENE00001093,WBGENE00001259,WBGENE00001333,WBGENE00001414,WBGENE00001424,WBGENE00001443,WBGENE00001488,WBGENE000…
GO:BP	gamete generation	GO:0007276	1.97e-11	10.7055	144	1695	62	10296	WBGENE00000183,WBGENE00000534,WBGENE00000875,WBGENE00001249,WBGENE00001303,WBGENE00001414,WBGENE00001996,WBGENE00002059,WBGENE00002064,WBGENE00002143,WBGENE00002214,WBGENE00002694,WBGENE00002845,WBGENE00003784,WBGENE00003902,WBGENE00003992,WBGENE00004046,WBGENE00004178,WBGENE00004271,WBGENE00004274,WBGENE00004698,WBGENE00004699,WBGENE00004775,WBGENE00004958,WBGENE00004959,WBGENE00004960,WBGENE000…
GO:BP	cellular metabolic process	GO:0044237	2.46e-11	10.6088	5820	1695	1097	10296	WBGENE00000041,WBGENE00000097,WBGENE00000099,WBGENE00000101,WBGENE00000102,WBGENE00000112,WBGENE00000123,WBGENE00000144,WBGENE00000151,WBGENE00000155,WBGENE00000184,WBGENE00000198,WBGENE00000206,WBGENE00000209,WBGENE00000226,WBGENE00000229,WBGENE00000230,WBGENE00000259,WBGENE00000266,WBGENE00000270,WBGENE00000275,WBGENE00000376,WBGENE00000389,WBGENE00000392,WBGENE00000405,WBGENE00000407,WBGENE000…
GO:BP	cell cycle	GO:0007049	2.58e-11	10.5884	372	1695	119	10296	WBGENE00000226,WBGENE00000248,WBGENE00000257,WBGENE00000275,WBGENE00000389,WBGENE00000419,WBGENE00000498,WBGENE00000502,WBGENE00000517,WBGENE00000875,WBGENE00001017,WBGENE00001829,WBGENE00001830,WBGENE00001860,WBGENE00001862,WBGENE00001867,WBGENE00001996,WBGENE00002180,WBGENE00002201,WBGENE00002214,WBGENE00002219,WBGENE00002229,WBGENE00002297,WBGENE00002694,WBGENE00002845,WBGENE00003020,WBGENE000…
GO:BP	localization	GO:0051179	7.1e-11	10.1489	1988	1695	440	10296	WBGENE00000007,WBGENE00000019,WBGENE00000020,WBGENE00000023,WBGENE00000097,WBGENE00000101,WBGENE00000121,WBGENE00000122,WBGENE00000150,WBGENE00000158,WBGENE00000160,WBGENE00000169,WBGENE00000171,WBGENE00000183,WBGENE00000184,WBGENE00000206,WBGENE00000209,WBGENE00000229,WBGENE00000230,WBGENE00000419,WBGENE00000464,WBGENE00000585,WBGENE00000869,WBGENE00000955,WBGENE00001007,WBGENE00001017,WBGENE000…
GO:BP	male gamete generation	GO:0048232	1.4e-10	9.85331	49	1695	31	10296	WBGENE00001249,WBGENE00001414,WBGENE00002059,WBGENE00004178,WBGENE00004698,WBGENE00004699,WBGENE00004958,WBGENE00004959,WBGENE00004960,WBGENE00004962,WBGENE00004964,WBGENE00004965,WBGENE00004966,WBGENE00004969,WBGENE00004971,WBGENE00004974,WBGENE00004975,WBGENE00006449,WBGENE00006699,WBGENE00007028,WBGENE00007307,WBGENE00007732,WBGENE00007733,WBGENE00011910,WBGENE00013747,WBGENE00016960,WBGENE000…
GO:BP	proteasome-mediated ubiquitin-dependent protein catabolic process	GO:0043161	1.77e-10	9.75314	139	1695	59	10296	WBGENE00000097,WBGENE00000144,WBGENE00000500,WBGENE00003917,WBGENE00003926,WBGENE00003947,WBGENE00004458,WBGENE00004461,WBGENE00004464,WBGENE00004504,WBGENE00004506,WBGENE00004759,WBGENE00004768,WBGENE00004807,WBGENE00004808,WBGENE00006701,WBGENE00006703,WBGENE00006704,WBGENE00006707,WBGENE00006715,WBGENE00006724,WBGENE00006733,WBGENE00006734,WBGENE00006856,WBGENE00007009,WBGENE00007168,WBGENE000…
GO:BP	endoplasmic reticulum to Golgi vesicle-mediated transport	GO:0006888	2.09e-10	9.68055	55	1695	33	10296	WBGENE00002070,WBGENE00003806,WBGENE00004754,WBGENE00004755,WBGENE00004756,WBGENE00006373,WBGENE00006565,WBGENE00009336,WBGENE00009654,WBGENE00009829,WBGENE00010178,WBGENE00010427,WBGENE00010496,WBGENE00010670,WBGENE00010699,WBGENE00010713,WBGENE00011338,WBGENE00011775,WBGENE00011835,WBGENE00012371,WBGENE00013196,WBGENE00013360,WBGENE00013985,WBGENE00015164,WBGENE00017643,WBGENE00018088,WBGENE000…
GO:BP	cell cycle process	GO:0022402	3.16e-10	9.50015	294	1695	98	10296	WBGENE00000226,WBGENE00000257,WBGENE00000275,WBGENE00000389,WBGENE00000419,WBGENE00000498,WBGENE00000502,WBGENE00000517,WBGENE00000875,WBGENE00001017,WBGENE00001829,WBGENE00001830,WBGENE00001860,WBGENE00001862,WBGENE00001867,WBGENE00001996,WBGENE00002180,WBGENE00002201,WBGENE00002214,WBGENE00002219,WBGENE00002229,WBGENE00002297,WBGENE00002694,WBGENE00002845,WBGENE00003499,WBGENE00003576,WBGENE000…
GO:BP	cellular component organization or biogenesis	GO:0071840	4.18e-10	9.37883	1717	1695	386	10296	WBGENE00000226,WBGENE00000228,WBGENE00000248,WBGENE00000257,WBGENE00000275,WBGENE00000293,WBGENE00000419,WBGENE00000500,WBGENE00000502,WBGENE00000534,WBGENE00000549,WBGENE00000585,WBGENE00000875,WBGENE00000938,WBGENE00001007,WBGENE00001016,WBGENE00001017,WBGENE00001027,WBGENE00001092,WBGENE00001093,WBGENE00001259,WBGENE00001333,WBGENE00001414,WBGENE00001424,WBGENE00001443,WBGENE00001488,WBGENE000…
GO:BP	mitochondrial electron transport, NADH to ubiquinone	GO:0006120	6.37e-10	9.19605	20	1695	18	10296	WBGENE00003061,WBGENE00003831,WBGENE00006463,WBGENE00007880,WBGENE00009051,WBGENE00009294,WBGENE00009992,WBGENE00013308,WBGENE00013406,WBGENE00014086,WBGENE00015810,WBGENE00016393,WBGENE00019401,WBGENE00020417,WBGENE00020636,WBGENE00021562,WBGENE00021839,WBGENE00021849
GO:BP	sexual reproduction	GO:0019953	2.21e-09	8.65506	184	1695	69	10296	WBGENE00000183,WBGENE00000534,WBGENE00000875,WBGENE00001017,WBGENE00001249,WBGENE00001303,WBGENE00001414,WBGENE00001996,WBGENE00002059,WBGENE00002064,WBGENE00002143,WBGENE00002214,WBGENE00002694,WBGENE00002845,WBGENE00003784,WBGENE00003902,WBGENE00003992,WBGENE00004046,WBGENE00004109,WBGENE00004178,WBGENE00004271,WBGENE00004274,WBGENE00004698,WBGENE00004699,WBGENE00004775,WBGENE00004958,WBGENE000…
GO:BP	spermatogenesis	GO:0007283	3.74e-09	8.4271	45	1695	28	10296	WBGENE00001249,WBGENE00001414,WBGENE00002059,WBGENE00004178,WBGENE00004698,WBGENE00004699,WBGENE00004958,WBGENE00004959,WBGENE00004960,WBGENE00004962,WBGENE00004964,WBGENE00004965,WBGENE00004966,WBGENE00004969,WBGENE00004971,WBGENE00004974,WBGENE00004975,WBGENE00006449,WBGENE00006699,WBGENE00007028,WBGENE00007732,WBGENE00011910,WBGENE00013747,WBGENE00016960,WBGENE00017733,WBGENE00018586,WBGENE000…
GO:BP	organelle fission	GO:0048285	6.56e-09	8.18338	153	1695	60	10296	WBGENE00000226,WBGENE00000257,WBGENE00000275,WBGENE00000875,WBGENE00001093,WBGENE00001424,WBGENE00001829,WBGENE00001830,WBGENE00001860,WBGENE00001862,WBGENE00001867,WBGENE00002201,WBGENE00002214,WBGENE00002219,WBGENE00002229,WBGENE00003499,WBGENE00003576,WBGENE00003793,WBGENE00003806,WBGENE00004178,WBGENE00004320,WBGENE00004373,WBGENE00004737,WBGENE00004738,WBGENE00004775,WBGENE00004874,WBGENE000…
GO:BP	cellular catabolic process	GO:0044248	7.41e-09	8.13015	735	1695	190	10296	WBGENE00000097,WBGENE00000112,WBGENE00000144,WBGENE00000155,WBGENE00000376,WBGENE00000392,WBGENE00000500,WBGENE00000836,WBGENE00000837,WBGENE00000838,WBGENE00000939,WBGENE00001153,WBGENE00001424,WBGENE00002183,WBGENE00002344,WBGENE00002583,WBGENE00002845,WBGENE00003917,WBGENE00003922,WBGENE00003923,WBGENE00003924,WBGENE00003925,WBGENE00003926,WBGENE00003927,WBGENE00003928,WBGENE00003947,WBGENE000…
GO:BP	establishment of localization	GO:0051234	9.29e-09	8.03205	1731	1695	382	10296	WBGENE00000007,WBGENE00000019,WBGENE00000020,WBGENE00000023,WBGENE00000097,WBGENE00000101,WBGENE00000121,WBGENE00000122,WBGENE00000150,WBGENE00000158,WBGENE00000160,WBGENE00000169,WBGENE00000171,WBGENE00000183,WBGENE00000184,WBGENE00000206,WBGENE00000209,WBGENE00000229,WBGENE00000230,WBGENE00000419,WBGENE00000464,WBGENE00000585,WBGENE00000869,WBGENE00000955,WBGENE00001007,WBGENE00001017,WBGENE000…
GO:BP	multi-organism reproductive process	GO:0044703	9.39e-09	8.02727	189	1695	69	10296	WBGENE00000183,WBGENE00000534,WBGENE00000875,WBGENE00001017,WBGENE00001249,WBGENE00001303,WBGENE00001414,WBGENE00001996,WBGENE00002059,WBGENE00002064,WBGENE00002143,WBGENE00002214,WBGENE00002694,WBGENE00002845,WBGENE00003784,WBGENE00003902,WBGENE00003992,WBGENE00004046,WBGENE00004109,WBGENE00004178,WBGENE00004271,WBGENE00004274,WBGENE00004698,WBGENE00004699,WBGENE00004775,WBGENE00004958,WBGENE000…
GO:BP	nuclear division	GO:0000280	9.97e-09	8.00151	143	1695	57	10296	WBGENE00000226,WBGENE00000257,WBGENE00000275,WBGENE00000875,WBGENE00001829,WBGENE00001830,WBGENE00001860,WBGENE00001862,WBGENE00001867,WBGENE00002201,WBGENE00002214,WBGENE00002219,WBGENE00002229,WBGENE00003499,WBGENE00003576,WBGENE00003793,WBGENE00003806,WBGENE00004178,WBGENE00004320,WBGENE00004737,WBGENE00004738,WBGENE00004775,WBGENE00004874,WBGENE00004888,WBGENE00004952,WBGENE00004953,WBGENE000…
GO:BP	protein localization to organelle	GO:0033365	1.63e-08	7.78905	187	1695	68	10296	WBGENE00000097,WBGENE00001047,WBGENE00001303,WBGENE00001662,WBGENE00002072,WBGENE00002074,WBGENE00002219,WBGENE00003025,WBGENE00003792,WBGENE00003793,WBGENE00003806,WBGENE00004101,WBGENE00004109,WBGENE00004738,WBGENE00004888,WBGENE00004953,WBGENE00004955,WBGENE00006565,WBGENE00006572,WBGENE00006733,WBGENE00007270,WBGENE00007278,WBGENE00007683,WBGENE00007686,WBGENE00007696,WBGENE00007927,WBGENE000…
GO:BP	chromosome segregation	GO:0007059	3.37e-08	7.47285	128	1695	52	10296	WBGENE00000226,WBGENE00000257,WBGENE00000275,WBGENE00000875,WBGENE00001017,WBGENE00001829,WBGENE00001830,WBGENE00001860,WBGENE00001862,WBGENE00001867,WBGENE00002227,WBGENE00003499,WBGENE00003576,WBGENE00003806,WBGENE00004320,WBGENE00004737,WBGENE00004738,WBGENE00004775,WBGENE00004874,WBGENE00004888,WBGENE00004952,WBGENE00004960,WBGENE00006376,WBGENE00006377,WBGENE00006381,WBGENE00006540,WBGENE000…
GO:BP	peptidyl-tyrosine phosphorylation	GO:0018108	1.39e-07	6.856	72	1695	35	10296	WBGENE00002193,WBGENE00002198,WBGENE00002204,WBGENE00002206,WBGENE00002208,WBGENE00003150,WBGENE00004962,WBGENE00007270,WBGENE00009039,WBGENE00009160,WBGENE00010712,WBGENE00011039,WBGENE00012010,WBGENE00012011,WBGENE00012172,WBGENE00012785,WBGENE00013475,WBGENE00013801,WBGENE00013811,WBGENE00014813,WBGENE00015994,WBGENE00016085,WBGENE00016416,WBGENE00016462,WBGENE00016954,WBGENE00017736,WBGENE000…
GO:BP	metabolic process	GO:0008152	1.53e-07	6.81649	6555	1695	1191	10296	WBGENE00000019,WBGENE00000041,WBGENE00000097,WBGENE00000099,WBGENE00000101,WBGENE00000102,WBGENE00000112,WBGENE00000121,WBGENE00000122,WBGENE00000123,WBGENE00000144,WBGENE00000151,WBGENE00000155,WBGENE00000184,WBGENE00000198,WBGENE00000206,WBGENE00000209,WBGENE00000226,WBGENE00000229,WBGENE00000230,WBGENE00000254,WBGENE00000259,WBGENE00000266,WBGENE00000269,WBGENE00000270,WBGENE00000275,WBGENE000…
GO:BP	organophosphate metabolic process	GO:0019637	2.96e-07	6.52832	381	1695	110	10296	WBGENE00000184,WBGENE00000206,WBGENE00000209,WBGENE00000226,WBGENE00000229,WBGENE00000230,WBGENE00000869,WBGENE00001538,WBGENE00002879,WBGENE00003580,WBGENE00004040,WBGENE00004076,WBGENE00004272,WBGENE00006491,WBGENE00006568,WBGENE00006601,WBGENE00006768,WBGENE00006919,WBGENE00007089,WBGENE00007189,WBGENE00007385,WBGENE00007824,WBGENE00007912,WBGENE00007969,WBGENE00008230,WBGENE00008346,WBGENE000…
GO:BP	ERAD pathway	GO:0036503	3.08e-07	6.51142	37	1695	23	10296	WBGENE00004381,WBGENE00004504,WBGENE00004759,WBGENE00004768,WBGENE00006703,WBGENE00006733,WBGENE00006734,WBGENE00007574,WBGENE00007626,WBGENE00008053,WBGENE00008148,WBGENE00008852,WBGENE00009178,WBGENE00013667,WBGENE00013881,WBGENE00014031,WBGENE00014204,WBGENE00015126,WBGENE00018611,WBGENE00018847,WBGENE00019893,WBGENE00022703,WBGENE00022800
GO:BP	mitotic cell cycle process	GO:1903047	3.17e-07	6.49917	162	1695	59	10296	WBGENE00000257,WBGENE00000275,WBGENE00000389,WBGENE00000419,WBGENE00000517,WBGENE00000875,WBGENE00001017,WBGENE00001829,WBGENE00001830,WBGENE00001860,WBGENE00002180,WBGENE00002219,WBGENE00002297,WBGENE00002694,WBGENE00002845,WBGENE00003576,WBGENE00003777,WBGENE00003793,WBGENE00003806,WBGENE00003902,WBGENE00003917,WBGENE00004178,WBGENE00004274,WBGENE00004732,WBGENE00004737,WBGENE00004738,WBGENE000…
GO:BP	reproduction	GO:0000003	3.19e-07	6.49634	579	1695	152	10296	WBGENE00000183,WBGENE00000226,WBGENE00000248,WBGENE00000389,WBGENE00000500,WBGENE00000517,WBGENE00000534,WBGENE00000875,WBGENE00001017,WBGENE00001249,WBGENE00001303,WBGENE00001413,WBGENE00001414,WBGENE00001829,WBGENE00001830,WBGENE00001862,WBGENE00001867,WBGENE00001996,WBGENE00002059,WBGENE00002064,WBGENE00002143,WBGENE00002201,WBGENE00002214,WBGENE00002219,WBGENE00002229,WBGENE00002238,WBGENE000…
GO:BP	peptidyl-tyrosine modification	GO:0018212	3.61e-07	6.44244	74	1695	35	10296	WBGENE00002193,WBGENE00002198,WBGENE00002204,WBGENE00002206,WBGENE00002208,WBGENE00003150,WBGENE00004962,WBGENE00007270,WBGENE00009039,WBGENE00009160,WBGENE00010712,WBGENE00011039,WBGENE00012010,WBGENE00012011,WBGENE00012172,WBGENE00012785,WBGENE00013475,WBGENE00013801,WBGENE00013811,WBGENE00014813,WBGENE00015994,WBGENE00016085,WBGENE00016416,WBGENE00016462,WBGENE00016954,WBGENE00017736,WBGENE000…
GO:BP	transport	GO:0006810	3.76e-07	6.42465	1690	1695	366	10296	WBGENE00000007,WBGENE00000019,WBGENE00000020,WBGENE00000023,WBGENE00000097,WBGENE00000101,WBGENE00000121,WBGENE00000122,WBGENE00000150,WBGENE00000158,WBGENE00000160,WBGENE00000169,WBGENE00000171,WBGENE00000183,WBGENE00000184,WBGENE00000206,WBGENE00000209,WBGENE00000229,WBGENE00000230,WBGENE00000419,WBGENE00000464,WBGENE00000585,WBGENE00000869,WBGENE00000955,WBGENE00001007,WBGENE00001017,WBGENE000…
GO:BP	purine nucleoside triphosphate metabolic process	GO:0009144	4.43e-07	6.35399	27	1695	19	10296	WBGENE00000206,WBGENE00000209,WBGENE00000229,WBGENE00000230,WBGENE00000869,WBGENE00006768,WBGENE00006919,WBGENE00007385,WBGENE00009119,WBGENE00010419,WBGENE00011015,WBGENE00011273,WBGENE00013025,WBGENE00017982,WBGENE00019061,WBGENE00020275,WBGENE00022089,WBGENE00022336,WBGENE00022673
GO:BP	cell division	GO:0051301	4.45e-07	6.35126	117	1695	47	10296	WBGENE00000389,WBGENE00000517,WBGENE00000875,WBGENE00001860,WBGENE00002180,WBGENE00002214,WBGENE00002219,WBGENE00002297,WBGENE00002694,WBGENE00003777,WBGENE00003806,WBGENE00003902,WBGENE00003917,WBGENE00003992,WBGENE00004178,WBGENE00004274,WBGENE00004320,WBGENE00004357,WBGENE00004737,WBGENE00004738,WBGENE00004775,WBGENE00004874,WBGENE00004959,WBGENE00006381,WBGENE00006528,WBGENE00006540,WBGENE000…
GO:BP	chromosome organization	GO:0051276	4.66e-07	6.33162	259	1695	82	10296	WBGENE00000257,WBGENE00000275,WBGENE00000875,WBGENE00000938,WBGENE00001016,WBGENE00001092,WBGENE00001259,WBGENE00001829,WBGENE00001830,WBGENE00001855,WBGENE00001860,WBGENE00001862,WBGENE00001973,WBGENE00002229,WBGENE00002717,WBGENE00003025,WBGENE00003367,WBGENE00003576,WBGENE00003806,WBGENE00004204,WBGENE00004320,WBGENE00004323,WBGENE00004510,WBGENE00004737,WBGENE00004738,WBGENE00004751,WBGENE000…
GO:BP	mitotic nuclear division	GO:0140014	5.71e-07	6.2435	75	1695	35	10296	WBGENE00000257,WBGENE00000275,WBGENE00000875,WBGENE00001829,WBGENE00001830,WBGENE00001860,WBGENE00003576,WBGENE00003793,WBGENE00003806,WBGENE00004178,WBGENE00004737,WBGENE00004738,WBGENE00004775,WBGENE00004874,WBGENE00004888,WBGENE00004952,WBGENE00004953,WBGENE00006381,WBGENE00006540,WBGENE00006974,WBGENE00009254,WBGENE00010093,WBGENE00010198,WBGENE00010425,WBGENE00010785,WBGENE00012121,WBGENE000…
GO:BP	nuclear chromosome segregation	GO:0098813	7.23e-07	6.14113	111	1695	45	10296	WBGENE00000226,WBGENE00000257,WBGENE00000275,WBGENE00000875,WBGENE00001829,WBGENE00001830,WBGENE00001860,WBGENE00001862,WBGENE00001867,WBGENE00003499,WBGENE00003576,WBGENE00003806,WBGENE00004320,WBGENE00004737,WBGENE00004738,WBGENE00004775,WBGENE00004874,WBGENE00004888,WBGENE00004952,WBGENE00004960,WBGENE00006376,WBGENE00006377,WBGENE00006381,WBGENE00006540,WBGENE00006974,WBGENE00006994,WBGENE000…
GO:BP	cellular process involved in reproduction in multicellular organism	GO:0022412	1.02e-06	5.99227	112	1695	45	10296	WBGENE00000183,WBGENE00000534,WBGENE00000875,WBGENE00001303,WBGENE00001996,WBGENE00002059,WBGENE00002143,WBGENE00002214,WBGENE00002694,WBGENE00002845,WBGENE00003784,WBGENE00003902,WBGENE00003992,WBGENE00004046,WBGENE00004178,WBGENE00004271,WBGENE00004274,WBGENE00004775,WBGENE00004958,WBGENE00004959,WBGENE00004960,WBGENE00004962,WBGENE00004964,WBGENE00004965,WBGENE00004966,WBGENE00004969,WBGENE000…
GO:BP	mitotic cell cycle	GO:0000278	1.5e-06	5.82442	209	1695	69	10296	WBGENE00000248,WBGENE00000257,WBGENE00000275,WBGENE00000389,WBGENE00000419,WBGENE00000517,WBGENE00000875,WBGENE00001017,WBGENE00001829,WBGENE00001830,WBGENE00001860,WBGENE00002180,WBGENE00002219,WBGENE00002297,WBGENE00002694,WBGENE00002845,WBGENE00003576,WBGENE00003777,WBGENE00003793,WBGENE00003806,WBGENE00003902,WBGENE00003917,WBGENE00004178,WBGENE00004274,WBGENE00004732,WBGENE00004737,WBGENE000…
GO:BP	nucleoside triphosphate biosynthetic process	GO:0009142	1.66e-06	5.78062	31	1695	20	10296	WBGENE00000206,WBGENE00000209,WBGENE00000229,WBGENE00000230,WBGENE00000869,WBGENE00006768,WBGENE00006919,WBGENE00007089,WBGENE00007385,WBGENE00009119,WBGENE00010419,WBGENE00011015,WBGENE00011273,WBGENE00013025,WBGENE00014058,WBGENE00017982,WBGENE00019061,WBGENE00020275,WBGENE00022089,WBGENE00022336
GO:BP	purine nucleotide metabolic process	GO:0006163	1.85e-06	5.73292	129	1695	49	10296	WBGENE00000206,WBGENE00000209,WBGENE00000229,WBGENE00000230,WBGENE00000869,WBGENE00002879,WBGENE00004076,WBGENE00006601,WBGENE00006768,WBGENE00006919,WBGENE00007385,WBGENE00007824,WBGENE00007969,WBGENE00008230,WBGENE00008780,WBGENE00009119,WBGENE00009126,WBGENE00009439,WBGENE00010419,WBGENE00010912,WBGENE00011015,WBGENE00011128,WBGENE00011273,WBGENE00011500,WBGENE00011510,WBGENE00011884,WBGENE000…
GO:BP	purine ribonucleoside triphosphate biosynthetic process	GO:0009206	1.92e-06	5.71767	26	1695	18	10296	WBGENE00000206,WBGENE00000209,WBGENE00000229,WBGENE00000230,WBGENE00000869,WBGENE00006768,WBGENE00006919,WBGENE00007385,WBGENE00009119,WBGENE00010419,WBGENE00011015,WBGENE00011273,WBGENE00013025,WBGENE00017982,WBGENE00019061,WBGENE00020275,WBGENE00022089,WBGENE00022336
GO:BP	purine nucleoside triphosphate biosynthetic process	GO:0009145	1.92e-06	5.71767	26	1695	18	10296	WBGENE00000206,WBGENE00000209,WBGENE00000229,WBGENE00000230,WBGENE00000869,WBGENE00006768,WBGENE00006919,WBGENE00007385,WBGENE00009119,WBGENE00010419,WBGENE00011015,WBGENE00011273,WBGENE00013025,WBGENE00017982,WBGENE00019061,WBGENE00020275,WBGENE00022089,WBGENE00022336
GO:BP	purine ribonucleoside triphosphate metabolic process	GO:0009205	1.92e-06	5.71767	26	1695	18	10296	WBGENE00000206,WBGENE00000209,WBGENE00000229,WBGENE00000230,WBGENE00000869,WBGENE00006768,WBGENE00006919,WBGENE00007385,WBGENE00009119,WBGENE00010419,WBGENE00011015,WBGENE00011273,WBGENE00013025,WBGENE00017982,WBGENE00019061,WBGENE00020275,WBGENE00022089,WBGENE00022336
GO:BP	nucleoside triphosphate metabolic process	GO:0009141	2.11e-06	5.67658	34	1695	21	10296	WBGENE00000206,WBGENE00000209,WBGENE00000229,WBGENE00000230,WBGENE00000869,WBGENE00006768,WBGENE00006919,WBGENE00007089,WBGENE00007385,WBGENE00009119,WBGENE00010419,WBGENE00011015,WBGENE00011273,WBGENE00013025,WBGENE00014058,WBGENE00017982,WBGENE00019061,WBGENE00020275,WBGENE00022089,WBGENE00022336,WBGENE00022673
GO:BP	reproductive process	GO:0022414	2.28e-06	5.64299	531	1695	139	10296	WBGENE00000183,WBGENE00000226,WBGENE00000248,WBGENE00000389,WBGENE00000500,WBGENE00000517,WBGENE00000534,WBGENE00000875,WBGENE00001017,WBGENE00001249,WBGENE00001303,WBGENE00001413,WBGENE00001414,WBGENE00001829,WBGENE00001830,WBGENE00001862,WBGENE00001867,WBGENE00001996,WBGENE00002059,WBGENE00002064,WBGENE00002143,WBGENE00002201,WBGENE00002214,WBGENE00002219,WBGENE00002229,WBGENE00002238,WBGENE000…
GO:BP	ribose phosphate metabolic process	GO:0019693	2.66e-06	5.5749	138	1695	51	10296	WBGENE00000206,WBGENE00000209,WBGENE00000229,WBGENE00000230,WBGENE00000869,WBGENE00002879,WBGENE00004076,WBGENE00006601,WBGENE00006768,WBGENE00006919,WBGENE00007089,WBGENE00007385,WBGENE00007824,WBGENE00007969,WBGENE00008230,WBGENE00008780,WBGENE00009119,WBGENE00009126,WBGENE00009439,WBGENE00009575,WBGENE00010419,WBGENE00010912,WBGENE00011015,WBGENE00011128,WBGENE00011273,WBGENE00011500,WBGENE000…
GO:BP	purine-containing compound metabolic process	GO:0072521	2.66e-06	5.5749	138	1695	51	10296	WBGENE00000206,WBGENE00000209,WBGENE00000229,WBGENE00000230,WBGENE00000869,WBGENE00002879,WBGENE00004076,WBGENE00006601,WBGENE00006768,WBGENE00006919,WBGENE00007106,WBGENE00007385,WBGENE00007824,WBGENE00007969,WBGENE00008230,WBGENE00008780,WBGENE00009119,WBGENE00009126,WBGENE00009439,WBGENE00010419,WBGENE00010912,WBGENE00011015,WBGENE00011128,WBGENE00011273,WBGENE00011500,WBGENE00011510,WBGENE000…
GO:BP	ribonucleoside triphosphate metabolic process	GO:0009199	2.86e-06	5.54435	29	1695	19	10296	WBGENE00000206,WBGENE00000209,WBGENE00000229,WBGENE00000230,WBGENE00000869,WBGENE00006768,WBGENE00006919,WBGENE00007089,WBGENE00007385,WBGENE00009119,WBGENE00010419,WBGENE00011015,WBGENE00011273,WBGENE00013025,WBGENE00017982,WBGENE00019061,WBGENE00020275,WBGENE00022089,WBGENE00022336
GO:BP	ribonucleoside triphosphate biosynthetic process	GO:0009201	2.86e-06	5.54435	29	1695	19	10296	WBGENE00000206,WBGENE00000209,WBGENE00000229,WBGENE00000230,WBGENE00000869,WBGENE00006768,WBGENE00006919,WBGENE00007089,WBGENE00007385,WBGENE00009119,WBGENE00010419,WBGENE00011015,WBGENE00011273,WBGENE00013025,WBGENE00017982,WBGENE00019061,WBGENE00020275,WBGENE00022089,WBGENE00022336
GO:BP	ATP biosynthetic process	GO:0006754	3.08e-06	5.51084	24	1695	17	10296	WBGENE00000206,WBGENE00000209,WBGENE00000229,WBGENE00000230,WBGENE00000869,WBGENE00006768,WBGENE00006919,WBGENE00007385,WBGENE00010419,WBGENE00011015,WBGENE00011273,WBGENE00013025,WBGENE00017982,WBGENE00019061,WBGENE00020275,WBGENE00022089,WBGENE00022336
GO:BP	proton transmembrane transport	GO:1902600	3.64e-06	5.43866	69	1695	32	10296	WBGENE00000206,WBGENE00000209,WBGENE00000229,WBGENE00000230,WBGENE00000869,WBGENE00002162,WBGENE00003735,WBGENE00004959,WBGENE00006768,WBGENE00006911,WBGENE00006917,WBGENE00006918,WBGENE00006919,WBGENE00006920,WBGENE00007248,WBGENE00007385,WBGENE00009882,WBGENE00010130,WBGENE00010419,WBGENE00011015,WBGENE00011273,WBGENE00012033,WBGENE00012354,WBGENE00013025,WBGENE00016258,WBGENE00017982,WBGENE000…
GO:BP	primary metabolic process	GO:0044238	3.76e-06	5.42468	5898	1695	1077	10296	WBGENE00000041,WBGENE00000097,WBGENE00000099,WBGENE00000102,WBGENE00000112,WBGENE00000123,WBGENE00000144,WBGENE00000151,WBGENE00000155,WBGENE00000184,WBGENE00000198,WBGENE00000206,WBGENE00000209,WBGENE00000226,WBGENE00000229,WBGENE00000230,WBGENE00000254,WBGENE00000259,WBGENE00000266,WBGENE00000269,WBGENE00000270,WBGENE00000275,WBGENE00000376,WBGENE00000389,WBGENE00000392,WBGENE00000405,WBGENE000…
GO:BP	establishment of protein localization to membrane	GO:0090150	4.3e-06	5.36647	66	1695	31	10296	WBGENE00000184,WBGENE00001047,WBGENE00001303,WBGENE00001662,WBGENE00004964,WBGENE00006572,WBGENE00007637,WBGENE00007683,WBGENE00007696,WBGENE00008164,WBGENE00009012,WBGENE00009521,WBGENE00010097,WBGENE00010323,WBGENE00010892,WBGENE00011488,WBGENE00013311,WBGENE00014075,WBGENE00017799,WBGENE00017825,WBGENE00018009,WBGENE00019607,WBGENE00019893,WBGENE00020066,WBGENE00020193,WBGENE00021420,WBGENE000…
GO:BP	ribonucleotide metabolic process	GO:0009259	4.62e-06	5.33539	136	1695	50	10296	WBGENE00000206,WBGENE00000209,WBGENE00000229,WBGENE00000230,WBGENE00000869,WBGENE00002879,WBGENE00004076,WBGENE00006601,WBGENE00006768,WBGENE00006919,WBGENE00007089,WBGENE00007385,WBGENE00007824,WBGENE00007969,WBGENE00008230,WBGENE00008780,WBGENE00009119,WBGENE00009126,WBGENE00009439,WBGENE00009575,WBGENE00010419,WBGENE00010912,WBGENE00011015,WBGENE00011128,WBGENE00011273,WBGENE00011500,WBGENE000…
GO:BP	protein modification by small protein conjugation or removal	GO:0070647	4.7e-06	5.32745	227	1695	72	10296	WBGENE00000500,WBGENE00001112,WBGENE00001511,WBGENE00002344,WBGENE00003917,WBGENE00004320,WBGENE00004341,WBGENE00004381,WBGENE00004759,WBGENE00004768,WBGENE00004808,WBGENE00004888,WBGENE00006446,WBGENE00006699,WBGENE00006701,WBGENE00006702,WBGENE00006703,WBGENE00006704,WBGENE00006707,WBGENE00006713,WBGENE00006715,WBGENE00006719,WBGENE00006720,WBGENE00006724,WBGENE00006727,WBGENE00006728,WBGENE000…
GO:BP	sister chromatid segregation	GO:0000819	4.71e-06	5.32721	73	1695	33	10296	WBGENE00000257,WBGENE00000275,WBGENE00000875,WBGENE00001829,WBGENE00001830,WBGENE00001860,WBGENE00001862,WBGENE00003576,WBGENE00003806,WBGENE00004320,WBGENE00004737,WBGENE00004738,WBGENE00004775,WBGENE00004874,WBGENE00004888,WBGENE00004952,WBGENE00006381,WBGENE00006540,WBGENE00006974,WBGENE00007278,WBGENE00009254,WBGENE00010093,WBGENE00010425,WBGENE00010785,WBGENE00012121,WBGENE00012191,WBGENE000…
GO:BP	protein targeting	GO:0006605	4.79e-06	5.31975	98	1695	40	10296	WBGENE00000097,WBGENE00001047,WBGENE00001303,WBGENE00001662,WBGENE00004964,WBGENE00006572,WBGENE00007637,WBGENE00007683,WBGENE00007686,WBGENE00007696,WBGENE00007927,WBGENE00008164,WBGENE00008857,WBGENE00009012,WBGENE00009092,WBGENE00009313,WBGENE00009521,WBGENE00009734,WBGENE00010097,WBGENE00010323,WBGENE00010892,WBGENE00011306,WBGENE00011488,WBGENE00011629,WBGENE00011897,WBGENE00012550,WBGENE000…
GO:BP	multicellular organismal reproductive process	GO:0048609	5.02e-06	5.29966	249	1695	77	10296	WBGENE00000183,WBGENE00000248,WBGENE00000500,WBGENE00000534,WBGENE00000875,WBGENE00001249,WBGENE00001303,WBGENE00001414,WBGENE00001996,WBGENE00002059,WBGENE00002064,WBGENE00002143,WBGENE00002214,WBGENE00002219,WBGENE00002238,WBGENE00002694,WBGENE00002845,WBGENE00003784,WBGENE00003902,WBGENE00003964,WBGENE00003992,WBGENE00004046,WBGENE00004109,WBGENE00004178,WBGENE00004271,WBGENE00004274,WBGENE000…
GO:BP	small molecule metabolic process	GO:0044281	5.63e-06	5.24937	676	1695	167	10296	WBGENE00000112,WBGENE00000198,WBGENE00000206,WBGENE00000209,WBGENE00000229,WBGENE00000230,WBGENE00000266,WBGENE00000392,WBGENE00000536,WBGENE00000800,WBGENE00000833,WBGENE00000869,WBGENE00000985,WBGENE00001094,WBGENE00001153,WBGENE00001239,WBGENE00001245,WBGENE00001246,WBGENE00001503,WBGENE00001538,WBGENE00001603,WBGENE00001683,WBGENE00001686,WBGENE00001839,WBGENE00002183,WBGENE00002238,WBGENE000…
GO:BP	purine ribonucleotide metabolic process	GO:0009150	5.68e-06	5.24531	125	1695	47	10296	WBGENE00000206,WBGENE00000209,WBGENE00000229,WBGENE00000230,WBGENE00000869,WBGENE00002879,WBGENE00004076,WBGENE00006601,WBGENE00006768,WBGENE00006919,WBGENE00007385,WBGENE00007824,WBGENE00007969,WBGENE00008230,WBGENE00008780,WBGENE00009119,WBGENE00009126,WBGENE00009439,WBGENE00010419,WBGENE00010912,WBGENE00011015,WBGENE00011128,WBGENE00011273,WBGENE00011500,WBGENE00011510,WBGENE00011884,WBGENE000…
GO:BP	ubiquitin-dependent ERAD pathway	GO:0030433	6.59e-06	5.18141	30	1695	19	10296	WBGENE00004504,WBGENE00004759,WBGENE00004768,WBGENE00006703,WBGENE00006733,WBGENE00006734,WBGENE00007574,WBGENE00007626,WBGENE00008053,WBGENE00008148,WBGENE00008852,WBGENE00013667,WBGENE00013881,WBGENE00015126,WBGENE00018611,WBGENE00018847,WBGENE00019893,WBGENE00022703,WBGENE00022800
GO:BP	carbohydrate derivative metabolic process	GO:1901135	8.17e-06	5.08751	435	1695	117	10296	WBGENE00000206,WBGENE00000209,WBGENE00000229,WBGENE00000230,WBGENE00000266,WBGENE00000270,WBGENE00000392,WBGENE00000869,WBGENE00001505,WBGENE00001632,WBGENE00001639,WBGENE00001645,WBGENE00002879,WBGENE00004076,WBGENE00005019,WBGENE00005020,WBGENE00005022,WBGENE00005025,WBGENE00006568,WBGENE00006601,WBGENE00006768,WBGENE00006919,WBGENE00007043,WBGENE00007089,WBGENE00007102,WBGENE00007106,WBGENE000…
GO:BP	mitotic sister chromatid segregation	GO:0000070	9.36e-06	5.02882	61	1695	29	10296	WBGENE00000257,WBGENE00000275,WBGENE00000875,WBGENE00001829,WBGENE00001830,WBGENE00001860,WBGENE00003576,WBGENE00003806,WBGENE00004737,WBGENE00004738,WBGENE00004775,WBGENE00004874,WBGENE00004888,WBGENE00004952,WBGENE00006381,WBGENE00006540,WBGENE00006974,WBGENE00009254,WBGENE00010093,WBGENE00010425,WBGENE00010785,WBGENE00012121,WBGENE00012191,WBGENE00015515,WBGENE00017641,WBGENE00017643,WBGENE000…
GO:BP	multicellular organism reproduction	GO:0032504	1.24e-05	4.90493	267	1695	80	10296	WBGENE00000183,WBGENE00000248,WBGENE00000500,WBGENE00000534,WBGENE00000875,WBGENE00001249,WBGENE00001303,WBGENE00001414,WBGENE00001996,WBGENE00002059,WBGENE00002064,WBGENE00002143,WBGENE00002214,WBGENE00002219,WBGENE00002238,WBGENE00002694,WBGENE00002845,WBGENE00003784,WBGENE00003902,WBGENE00003964,WBGENE00003992,WBGENE00004046,WBGENE00004109,WBGENE00004178,WBGENE00004271,WBGENE00004274,WBGENE000…
GO:BP	ATP synthesis coupled proton transport	GO:0015986	1.34e-05	4.87191	23	1695	16	10296	WBGENE00000206,WBGENE00000209,WBGENE00000229,WBGENE00000230,WBGENE00000869,WBGENE00006768,WBGENE00007385,WBGENE00010419,WBGENE00011015,WBGENE00011273,WBGENE00013025,WBGENE00017982,WBGENE00019061,WBGENE00020275,WBGENE00022089,WBGENE00022336
GO:BP	energy coupled proton transport, down electrochemical gradient	GO:0015985	1.34e-05	4.87191	23	1695	16	10296	WBGENE00000206,WBGENE00000209,WBGENE00000229,WBGENE00000230,WBGENE00000869,WBGENE00006768,WBGENE00007385,WBGENE00010419,WBGENE00011015,WBGENE00011273,WBGENE00013025,WBGENE00017982,WBGENE00019061,WBGENE00020275,WBGENE00022089,WBGENE00022336
GO:BP	protein localization to endoplasmic reticulum	GO:0070972	1.65e-05	4.78348	34	1695	20	10296	WBGENE00000097,WBGENE00001047,WBGENE00001303,WBGENE00007683,WBGENE00007696,WBGENE00009012,WBGENE00009521,WBGENE00009783,WBGENE00010097,WBGENE00011306,WBGENE00012550,WBGENE00013311,WBGENE00013985,WBGENE00016195,WBGENE00016395,WBGENE00017799,WBGENE00019893,WBGENE00021420,WBGENE00021427,WBGENE00021883
GO:BP	spindle organization	GO:0007051	2.88e-05	4.54037	47	1695	24	10296	WBGENE00000257,WBGENE00000875,WBGENE00001829,WBGENE00001830,WBGENE00002219,WBGENE00002229,WBGENE00002845,WBGENE00003902,WBGENE00004952,WBGENE00004953,WBGENE00006381,WBGENE00006537,WBGENE00006540,WBGENE00006974,WBGENE00006994,WBGENE00008053,WBGENE00010198,WBGENE00012156,WBGENE00012191,WBGENE00015515,WBGENE00019940,WBGENE00020392,WBGENE00021460,WBGENE00021470
GO:BP	meiotic cell cycle	GO:0051321	3.93e-05	4.40611	116	1695	43	10296	WBGENE00000226,WBGENE00000389,WBGENE00000875,WBGENE00001829,WBGENE00001830,WBGENE00001862,WBGENE00001867,WBGENE00002201,WBGENE00002214,WBGENE00002219,WBGENE00002229,WBGENE00003499,WBGENE00004320,WBGENE00004737,WBGENE00004738,WBGENE00004775,WBGENE00004808,WBGENE00004874,WBGENE00004960,WBGENE00004985,WBGENE00006376,WBGENE00006377,WBGENE00006381,WBGENE00006537,WBGENE00006540,WBGENE00006974,WBGENE000…
GO:BP	nucleobase-containing small molecule metabolic process	GO:0055086	4.03e-05	4.39483	229	1695	70	10296	WBGENE00000206,WBGENE00000209,WBGENE00000229,WBGENE00000230,WBGENE00000266,WBGENE00000392,WBGENE00000869,WBGENE00001538,WBGENE00002879,WBGENE00003580,WBGENE00004076,WBGENE00004259,WBGENE00005019,WBGENE00005022,WBGENE00006568,WBGENE00006601,WBGENE00006768,WBGENE00006919,WBGENE00007089,WBGENE00007106,WBGENE00007385,WBGENE00007824,WBGENE00007969,WBGENE00008131,WBGENE00008230,WBGENE00008780,WBGENE000…
GO:BP	cellular response to stress	GO:0033554	4.1e-05	4.38764	380	1695	103	10296	WBGENE00000097,WBGENE00000151,WBGENE00000498,WBGENE00000500,WBGENE00000938,WBGENE00001860,WBGENE00001973,WBGENE00002002,WBGENE00002147,WBGENE00003025,WBGENE00003870,WBGENE00003964,WBGENE00004053,WBGENE00004320,WBGENE00004337,WBGENE00004340,WBGENE00004341,WBGENE00004381,WBGENE00004504,WBGENE00004736,WBGENE00004737,WBGENE00004738,WBGENE00004759,WBGENE00004768,WBGENE00004807,WBGENE00004930,WBGENE000…
GO:BP	protein polyubiquitination	GO:0000209	5.12e-05	4.29085	58	1695	27	10296	WBGENE00000500,WBGENE00002344,WBGENE00003917,WBGENE00006701,WBGENE00006702,WBGENE00006703,WBGENE00006704,WBGENE00006707,WBGENE00006713,WBGENE00006715,WBGENE00006719,WBGENE00006720,WBGENE00006730,WBGENE00006734,WBGENE00007009,WBGENE00007643,WBGENE00008433,WBGENE00008871,WBGENE00010923,WBGENE00013270,WBGENE00013538,WBGENE00016156,WBGENE00016158,WBGENE00018847,WBGENE00022069,WBGENE00022358,WBGENE000…
GO:BP	tricarboxylic acid cycle	GO:0006099	5.74e-05	4.24078	22	1695	15	10296	WBGENE00000041,WBGENE00001503,WBGENE00003162,WBGENE00003225,WBGENE00006433,WBGENE00009440,WBGENE00009664,WBGENE00010317,WBGENE00014098,WBGENE00016392,WBGENE00016844,WBGENE00017759,WBGENE00018491,WBGENE00020679,WBGENE00020950
GO:BP	endomembrane system organization	GO:0010256	6.94e-05	4.15866	118	1695	43	10296	WBGENE00000585,WBGENE00001414,WBGENE00002070,WBGENE00006311,WBGENE00006833,WBGENE00007696,WBGENE00008136,WBGENE00008346,WBGENE00009336,WBGENE00009753,WBGENE00009829,WBGENE00010254,WBGENE00010425,WBGENE00010579,WBGENE00010631,WBGENE00010670,WBGENE00010713,WBGENE00010828,WBGENE00011040,WBGENE00011338,WBGENE00011975,WBGENE00012345,WBGENE00012555,WBGENE00013052,WBGENE00013360,WBGENE00013740,WBGENE000…
GO:BP	protein targeting to membrane	GO:0006612	0.000101	3.99704	43	1695	22	10296	WBGENE00001047,WBGENE00001303,WBGENE00004964,WBGENE00007637,WBGENE00007683,WBGENE00007696,WBGENE00009012,WBGENE00009521,WBGENE00010097,WBGENE00010323,WBGENE00010892,WBGENE00011488,WBGENE00013311,WBGENE00014075,WBGENE00017799,WBGENE00018009,WBGENE00019893,WBGENE00020066,WBGENE00021420,WBGENE00021427,WBGENE00021952,WBGENE00044542
GO:BP	establishment of protein localization to endoplasmic reticulum	GO:0072599	0.000177	3.75247	26	1695	16	10296	WBGENE00000097,WBGENE00001047,WBGENE00001303,WBGENE00007683,WBGENE00007696,WBGENE00009012,WBGENE00009521,WBGENE00010097,WBGENE00011306,WBGENE00012550,WBGENE00013311,WBGENE00016395,WBGENE00017799,WBGENE00019893,WBGENE00021420,WBGENE00021427
GO:BP	protein targeting to ER	GO:0045047	0.000177	3.75247	26	1695	16	10296	WBGENE00000097,WBGENE00001047,WBGENE00001303,WBGENE00007683,WBGENE00007696,WBGENE00009012,WBGENE00009521,WBGENE00010097,WBGENE00011306,WBGENE00012550,WBGENE00013311,WBGENE00016395,WBGENE00017799,WBGENE00019893,WBGENE00021420,WBGENE00021427
GO:BP	spermatid differentiation	GO:0048515	0.000233	3.63325	16	1695	12	10296	WBGENE00002059,WBGENE00004958,WBGENE00004960,WBGENE00004962,WBGENE00004964,WBGENE00004966,WBGENE00004969,WBGENE00004971,WBGENE00004974,WBGENE00004975,WBGENE00013747,WBGENE00044067
GO:BP	nitrogen compound metabolic process	GO:0006807	0.000388	3.41117	5495	1695	996	10296	WBGENE00000097,WBGENE00000099,WBGENE00000102,WBGENE00000112,WBGENE00000123,WBGENE00000144,WBGENE00000151,WBGENE00000155,WBGENE00000206,WBGENE00000209,WBGENE00000226,WBGENE00000229,WBGENE00000230,WBGENE00000254,WBGENE00000259,WBGENE00000266,WBGENE00000270,WBGENE00000275,WBGENE00000376,WBGENE00000389,WBGENE00000392,WBGENE00000405,WBGENE00000407,WBGENE00000410,WBGENE00000464,WBGENE00000467,WBGENE000…
GO:BP	response to endoplasmic reticulum stress	GO:0034976	0.000466	3.33166	78	1695	31	10296	WBGENE00002147,WBGENE00003964,WBGENE00004381,WBGENE00004504,WBGENE00004736,WBGENE00004759,WBGENE00004768,WBGENE00005648,WBGENE00006703,WBGENE00006733,WBGENE00006734,WBGENE00006959,WBGENE00007574,WBGENE00007626,WBGENE00008053,WBGENE00008148,WBGENE00008852,WBGENE00009112,WBGENE00009178,WBGENE00013667,WBGENE00013881,WBGENE00014031,WBGENE00014204,WBGENE00015126,WBGENE00015752,WBGENE00018611,WBGENE000…
GO:BP	spindle elongation	GO:0051231	0.000477	3.32164	10	1695	9	10296	WBGENE00000257,WBGENE00000875,WBGENE00004952,WBGENE00006381,WBGENE00006974,WBGENE00006994,WBGENE00015515,WBGENE00020392,WBGENE00021460
GO:BP	proteolysis	GO:0006508	0.000486	3.31309	709	1695	165	10296	WBGENE00000097,WBGENE00000144,WBGENE00000155,WBGENE00000254,WBGENE00000500,WBGENE00000534,WBGENE00000543,WBGENE00000544,WBGENE00000836,WBGENE00000837,WBGENE00000838,WBGENE00001056,WBGENE00001112,WBGENE00001405,WBGENE00002249,WBGENE00002250,WBGENE00002344,WBGENE00003914,WBGENE00003917,WBGENE00003922,WBGENE00003923,WBGENE00003924,WBGENE00003925,WBGENE00003926,WBGENE00003927,WBGENE00003928,WBGENE000…
GO:BP	ribose phosphate biosynthetic process	GO:0046390	0.000534	3.27233	86	1695	33	10296	WBGENE00000206,WBGENE00000209,WBGENE00000229,WBGENE00000230,WBGENE00000869,WBGENE00002879,WBGENE00004076,WBGENE00006768,WBGENE00006919,WBGENE00007089,WBGENE00007385,WBGENE00007824,WBGENE00007969,WBGENE00009119,WBGENE00009439,WBGENE00009575,WBGENE00010419,WBGENE00010912,WBGENE00011015,WBGENE00011128,WBGENE00011273,WBGENE00011500,WBGENE00011510,WBGENE00013025,WBGENE00016415,WBGENE00017982,WBGENE000…
GO:BP	cellular lipid metabolic process	GO:0044255	0.00066	3.18041	362	1695	95	10296	WBGENE00000184,WBGENE00000198,WBGENE00000226,WBGENE00000985,WBGENE00001153,WBGENE00001239,WBGENE00001245,WBGENE00001246,WBGENE00002183,WBGENE00004040,WBGENE00004076,WBGENE00004272,WBGENE00006491,WBGENE00006518,WBGENE00007043,WBGENE00007102,WBGENE00007189,WBGENE00007363,WBGENE00007446,WBGENE00007912,WBGENE00007918,WBGENE00008346,WBGENE00008431,WBGENE00008581,WBGENE00008765,WBGENE00008918,WBGENE000…
GO:BP	regulation of mRNA metabolic process	GO:1903311	0.000684	3.16507	68	1695	28	10296	WBGENE00000376,WBGENE00001259,WBGENE00002845,WBGENE00004424,WBGENE00004698,WBGENE00004701,WBGENE00004705,WBGENE00004980,WBGENE00006499,WBGENE00006697,WBGENE00010046,WBGENE00010923,WBGENE00012245,WBGENE00013325,WBGENE00013808,WBGENE00014015,WBGENE00015557,WBGENE00015943,WBGENE00017816,WBGENE00017951,WBGENE00018154,WBGENE00018391,WBGENE00019509,WBGENE00022019,WBGENE00022101,WBGENE00022738,WBGENE000…
GO:BP	germ cell development	GO:0007281	0.000754	3.12266	91	1695	34	10296	WBGENE00000183,WBGENE00000534,WBGENE00001303,WBGENE00001996,WBGENE00002059,WBGENE00002694,WBGENE00002845,WBGENE00003784,WBGENE00003902,WBGENE00003992,WBGENE00004046,WBGENE00004178,WBGENE00004271,WBGENE00004274,WBGENE00004775,WBGENE00004958,WBGENE00004962,WBGENE00004964,WBGENE00004965,WBGENE00004966,WBGENE00004969,WBGENE00004971,WBGENE00004974,WBGENE00004975,WBGENE00006697,WBGENE00006699,WBGENE000…
GO:BP	nucleoside phosphate metabolic process	GO:0006753	0.000828	3.08188	192	1695	58	10296	WBGENE00000206,WBGENE00000209,WBGENE00000229,WBGENE00000230,WBGENE00000869,WBGENE00001538,WBGENE00002879,WBGENE00003580,WBGENE00004076,WBGENE00006568,WBGENE00006601,WBGENE00006768,WBGENE00006919,WBGENE00007089,WBGENE00007385,WBGENE00007824,WBGENE00007969,WBGENE00008230,WBGENE00008780,WBGENE00009119,WBGENE00009126,WBGENE00009176,WBGENE00009439,WBGENE00009575,WBGENE00010419,WBGENE00010912,WBGENE000…
GO:BP	microtubule cytoskeleton organization involved in mitosis	GO:1902850	0.000933	3.03028	58	1695	25	10296	WBGENE00000257,WBGENE00000419,WBGENE00000875,WBGENE00001017,WBGENE00002845,WBGENE00003902,WBGENE00003917,WBGENE00004732,WBGENE00004808,WBGENE00004952,WBGENE00004953,WBGENE00006381,WBGENE00006528,WBGENE00006540,WBGENE00006974,WBGENE00006994,WBGENE00008053,WBGENE00008166,WBGENE00010198,WBGENE00012191,WBGENE00015515,WBGENE00019940,WBGENE00020392,WBGENE00021460,WBGENE00021470
GO:BP	vesicle budding from membrane	GO:0006900	0.000988	3.00536	20	1695	13	10296	WBGENE00003806,WBGENE00004754,WBGENE00004755,WBGENE00004756,WBGENE00006565,WBGENE00010496,WBGENE00011338,WBGENE00013985,WBGENE00016961,WBGENE00017217,WBGENE00018290,WBGENE00021644,WBGENE00022678
GO:BP	organic substance metabolic process	GO:0071704	0.001069	2.97122	6298	1695	1122	10296	WBGENE00000019,WBGENE00000097,WBGENE00000099,WBGENE00000102,WBGENE00000112,WBGENE00000121,WBGENE00000122,WBGENE00000123,WBGENE00000144,WBGENE00000151,WBGENE00000155,WBGENE00000184,WBGENE00000198,WBGENE00000206,WBGENE00000209,WBGENE00000226,WBGENE00000229,WBGENE00000230,WBGENE00000254,WBGENE00000259,WBGENE00000266,WBGENE00000269,WBGENE00000270,WBGENE00000275,WBGENE00000376,WBGENE00000389,WBGENE000…
GO:BP	purine nucleotide biosynthetic process	GO:0006164	0.001151	2.93901	77	1695	30	10296	WBGENE00000206,WBGENE00000209,WBGENE00000229,WBGENE00000230,WBGENE00000869,WBGENE00002879,WBGENE00004076,WBGENE00006768,WBGENE00006919,WBGENE00007385,WBGENE00007824,WBGENE00007969,WBGENE00009119,WBGENE00009439,WBGENE00010419,WBGENE00010912,WBGENE00011015,WBGENE00011128,WBGENE00011273,WBGENE00011500,WBGENE00011510,WBGENE00013025,WBGENE00016415,WBGENE00017982,WBGENE00019061,WBGENE00020107,WBGENE000…
GO:BP	ribonucleotide biosynthetic process	GO:0009260	0.001275	2.89463	85	1695	32	10296	WBGENE00000206,WBGENE00000209,WBGENE00000229,WBGENE00000230,WBGENE00000869,WBGENE00002879,WBGENE00004076,WBGENE00006768,WBGENE00006919,WBGENE00007089,WBGENE00007385,WBGENE00007824,WBGENE00007969,WBGENE00009119,WBGENE00009439,WBGENE00009575,WBGENE00010419,WBGENE00010912,WBGENE00011015,WBGENE00011128,WBGENE00011273,WBGENE00011500,WBGENE00011510,WBGENE00013025,WBGENE00016415,WBGENE00017982,WBGENE000…
GO:BP	establishment of protein localization to organelle	GO:0072594	0.001279	2.89326	117	1695	40	10296	WBGENE00000097,WBGENE00001047,WBGENE00001303,WBGENE00001662,WBGENE00002072,WBGENE00002074,WBGENE00003793,WBGENE00003806,WBGENE00004109,WBGENE00006572,WBGENE00007683,WBGENE00007686,WBGENE00007696,WBGENE00007927,WBGENE00008164,WBGENE00008857,WBGENE00008919,WBGENE00009012,WBGENE00009092,WBGENE00009313,WBGENE00009521,WBGENE00009734,WBGENE00009956,WBGENE00010097,WBGENE00011306,WBGENE00011629,WBGENE000…
GO:BP	regulation of catabolic process	GO:0009894	0.001279	2.89326	117	1695	40	10296	WBGENE00000376,WBGENE00000500,WBGENE00002583,WBGENE00002845,WBGENE00004458,WBGENE00004459,WBGENE00004460,WBGENE00004506,WBGENE00004879,WBGENE00006414,WBGENE00006499,WBGENE00006724,WBGENE00006734,WBGENE00007009,WBGENE00007791,WBGENE00007969,WBGENE00008871,WBGENE00010923,WBGENE00011071,WBGENE00011604,WBGENE00012497,WBGENE00012732,WBGENE00013538,WBGENE00014015,WBGENE00015326,WBGENE00015688,WBGENE000…
GO:BP	transmembrane receptor protein tyrosine kinase signaling pathway	GO:0007169	0.001342	2.87216	93	1695	34	10296	WBGENE00002193,WBGENE00002198,WBGENE00002204,WBGENE00002206,WBGENE00002208,WBGENE00004109,WBGENE00004962,WBGENE00009039,WBGENE00009160,WBGENE00010712,WBGENE00011039,WBGENE00012010,WBGENE00012011,WBGENE00012172,WBGENE00012785,WBGENE00013475,WBGENE00013801,WBGENE00013811,WBGENE00015994,WBGENE00016085,WBGENE00016416,WBGENE00016462,WBGENE00016954,WBGENE00017736,WBGENE00018999,WBGENE00019081,WBGENE000…
GO:BP	translational initiation	GO:0006413	0.001351	2.86937	45	1695	21	10296	WBGENE00001225,WBGENE00001229,WBGENE00001233,WBGENE00002059,WBGENE00002061,WBGENE00002063,WBGENE00002064,WBGENE00002066,WBGENE00007111,WBGENE00008480,WBGENE00008670,WBGENE00010560,WBGENE00015920,WBGENE00016113,WBGENE00016496,WBGENE00018391,WBGENE00018405,WBGENE00019162,WBGENE00021351,WBGENE00021466,WBGENE00303000
GO:BP	protein localization to membrane	GO:0072657	0.001352	2.86911	105	1695	37	10296	WBGENE00000184,WBGENE00001047,WBGENE00001303,WBGENE00001333,WBGENE00001662,WBGENE00004272,WBGENE00004373,WBGENE00004964,WBGENE00006572,WBGENE00007270,WBGENE00007637,WBGENE00007683,WBGENE00007696,WBGENE00008164,WBGENE00009012,WBGENE00009521,WBGENE00010097,WBGENE00010323,WBGENE00010892,WBGENE00011488,WBGENE00013311,WBGENE00014075,WBGENE00014119,WBGENE00017799,WBGENE00017825,WBGENE00018009,WBGENE000…
GO:BP	meiotic cell cycle process	GO:1903046	0.001357	2.86754	97	1695	35	10296	WBGENE00000226,WBGENE00000389,WBGENE00000875,WBGENE00001829,WBGENE00001830,WBGENE00001862,WBGENE00001867,WBGENE00002201,WBGENE00002214,WBGENE00002219,WBGENE00002229,WBGENE00003499,WBGENE00004320,WBGENE00004737,WBGENE00004738,WBGENE00004775,WBGENE00004960,WBGENE00004985,WBGENE00006376,WBGENE00006377,WBGENE00006537,WBGENE00006540,WBGENE00006974,WBGENE00006994,WBGENE00007278,WBGENE00007307,WBGENE000…
GO:BP	mitochondrial transmembrane transport	GO:1990542	0.001368	2.86407	59	1695	25	10296	WBGENE00000230,WBGENE00000869,WBGENE00006439,WBGENE00007080,WBGENE00007686,WBGENE00007927,WBGENE00008137,WBGENE00008505,WBGENE00008857,WBGENE00009092,WBGENE00009313,WBGENE00009513,WBGENE00009734,WBGENE00010485,WBGENE00011273,WBGENE00011493,WBGENE00011662,WBGENE00011897,WBGENE00012402,WBGENE00013462,WBGENE00016358,WBGENE00017982,WBGENE00018765,WBGENE00020140,WBGENE00020383
GO:BP	protein ubiquitination	GO:0016567	0.001964	2.70694	157	1695	49	10296	WBGENE00000500,WBGENE00001511,WBGENE00002344,WBGENE00003917,WBGENE00004320,WBGENE00004381,WBGENE00004759,WBGENE00004768,WBGENE00004808,WBGENE00006699,WBGENE00006701,WBGENE00006702,WBGENE00006703,WBGENE00006704,WBGENE00006707,WBGENE00006713,WBGENE00006715,WBGENE00006719,WBGENE00006720,WBGENE00006727,WBGENE00006728,WBGENE00006730,WBGENE00006734,WBGENE00007009,WBGENE00007574,WBGENE00007626,WBGENE000…
GO:BP	nucleotide metabolic process	GO:0009117	0.002038	2.69079	188	1695	56	10296	WBGENE00000206,WBGENE00000209,WBGENE00000229,WBGENE00000230,WBGENE00000869,WBGENE00001538,WBGENE00002879,WBGENE00004076,WBGENE00006601,WBGENE00006768,WBGENE00006919,WBGENE00007089,WBGENE00007385,WBGENE00007824,WBGENE00007969,WBGENE00008230,WBGENE00008780,WBGENE00009119,WBGENE00009126,WBGENE00009176,WBGENE00009439,WBGENE00009575,WBGENE00010419,WBGENE00010912,WBGENE00011015,WBGENE00011128,WBGENE000…
GO:BP	purine ribonucleotide biosynthetic process	GO:0009152	0.002041	2.6901	75	1695	29	10296	WBGENE00000206,WBGENE00000209,WBGENE00000229,WBGENE00000230,WBGENE00000869,WBGENE00002879,WBGENE00004076,WBGENE00006768,WBGENE00006919,WBGENE00007385,WBGENE00007824,WBGENE00007969,WBGENE00009119,WBGENE00009439,WBGENE00010419,WBGENE00010912,WBGENE00011015,WBGENE00011128,WBGENE00011273,WBGENE00011500,WBGENE00011510,WBGENE00013025,WBGENE00016415,WBGENE00017982,WBGENE00019061,WBGENE00020275,WBGENE000…
GO:BP	protein transmembrane transport	GO:0071806	0.002098	2.67814	36	1695	18	10296	WBGENE00001047,WBGENE00001303,WBGENE00007683,WBGENE00007686,WBGENE00007696,WBGENE00007927,WBGENE00008164,WBGENE00008857,WBGENE00009012,WBGENE00009092,WBGENE00009313,WBGENE00009734,WBGENE00011897,WBGENE00013311,WBGENE00016318,WBGENE00019305,WBGENE00020383,WBGENE00021427
GO:BP	regulation of cell cycle	GO:0051726	0.002101	2.67764	153	1695	48	10296	WBGENE00000257,WBGENE00000275,WBGENE00000389,WBGENE00000498,WBGENE00000517,WBGENE00001862,WBGENE00002201,WBGENE00002219,WBGENE00002297,WBGENE00003020,WBGENE00003784,WBGENE00003793,WBGENE00003806,WBGENE00003902,WBGENE00004178,WBGENE00004320,WBGENE00004738,WBGENE00004767,WBGENE00004775,WBGENE00004807,WBGENE00004808,WBGENE00004955,WBGENE00006311,WBGENE00006376,WBGENE00006385,WBGENE00006528,WBGENE000…
GO:BP	organophosphate biosynthetic process	GO:0090407	0.002112	2.67534	252	1695	70	10296	WBGENE00000184,WBGENE00000206,WBGENE00000209,WBGENE00000226,WBGENE00000229,WBGENE00000230,WBGENE00000869,WBGENE00001538,WBGENE00002879,WBGENE00004040,WBGENE00004076,WBGENE00004272,WBGENE00006568,WBGENE00006601,WBGENE00006768,WBGENE00006919,WBGENE00007089,WBGENE00007189,WBGENE00007385,WBGENE00007824,WBGENE00007912,WBGENE00007969,WBGENE00008346,WBGENE00008431,WBGENE00008765,WBGENE00008918,WBGENE000…
GO:BP	non-membrane-bounded organelle assembly	GO:0140694	0.002144	2.6688	115	1695	39	10296	WBGENE00000257,WBGENE00000500,WBGENE00000875,WBGENE00001829,WBGENE00001830,WBGENE00002219,WBGENE00002229,WBGENE00003902,WBGENE00004357,WBGENE00004408,WBGENE00004414,WBGENE00004416,WBGENE00004474,WBGENE00004483,WBGENE00004484,WBGENE00004488,WBGENE00004496,WBGENE00004497,WBGENE00004952,WBGENE00004953,WBGENE00006974,WBGENE00007554,WBGENE00008968,WBGENE00009385,WBGENE00010685,WBGENE00012156,WBGENE000…
GO:BP	COPII-coated vesicle budding	GO:0090114	0.002236	2.65047	11	1695	9	10296	WBGENE00003806,WBGENE00004754,WBGENE00004755,WBGENE00004756,WBGENE00006565,WBGENE00010496,WBGENE00011338,WBGENE00013985,WBGENE00022678
GO:BP	spindle assembly	GO:0051225	0.002496	2.60282	30	1695	16	10296	WBGENE00000257,WBGENE00000875,WBGENE00001829,WBGENE00001830,WBGENE00002219,WBGENE00002229,WBGENE00003902,WBGENE00004952,WBGENE00004953,WBGENE00006974,WBGENE00012156,WBGENE00015515,WBGENE00019940,WBGENE00020392,WBGENE00021460,WBGENE00021470
GO:BP	protein modification by small protein conjugation	GO:0032446	0.002605	2.58424	176	1695	53	10296	WBGENE00000500,WBGENE00001511,WBGENE00002344,WBGENE00003917,WBGENE00004320,WBGENE00004341,WBGENE00004381,WBGENE00004759,WBGENE00004768,WBGENE00004808,WBGENE00004888,WBGENE00006699,WBGENE00006701,WBGENE00006702,WBGENE00006703,WBGENE00006704,WBGENE00006707,WBGENE00006713,WBGENE00006715,WBGENE00006719,WBGENE00006720,WBGENE00006727,WBGENE00006728,WBGENE00006730,WBGENE00006734,WBGENE00007009,WBGENE000…
GO:BP	mitotic spindle elongation	GO:0000022	0.002622	2.58129	9	1695	8	10296	WBGENE00000257,WBGENE00000875,WBGENE00004952,WBGENE00006381,WBGENE00006974,WBGENE00015515,WBGENE00020392,WBGENE00021460
GO:BP	purine-containing compound biosynthetic process	GO:0072522	0.002903	2.5371	80	1695	30	10296	WBGENE00000206,WBGENE00000209,WBGENE00000229,WBGENE00000230,WBGENE00000869,WBGENE00002879,WBGENE00004076,WBGENE00006768,WBGENE00006919,WBGENE00007385,WBGENE00007824,WBGENE00007969,WBGENE00009119,WBGENE00009439,WBGENE00010419,WBGENE00010912,WBGENE00011015,WBGENE00011128,WBGENE00011273,WBGENE00011500,WBGENE00011510,WBGENE00013025,WBGENE00016415,WBGENE00017982,WBGENE00019061,WBGENE00020107,WBGENE000…
GO:BP	cytoplasmic translation	GO:0002181	0.003215	2.49281	47	1695	21	10296	WBGENE00004408,WBGENE00004409,WBGENE00004410,WBGENE00004420,WBGENE00004445,WBGENE00004447,WBGENE00004450,WBGENE00004492,WBGENE00004497,WBGENE00007111,WBGENE00009880,WBGENE00010405,WBGENE00010560,WBGENE00012126,WBGENE00015920,WBGENE00016113,WBGENE00016493,WBGENE00016496,WBGENE00019537,WBGENE00021466,WBGENE00303000
GO:BP	cytokinesis	GO:0000910	0.003941	2.40437	34	1695	17	10296	WBGENE00000875,WBGENE00002180,WBGENE00002214,WBGENE00002219,WBGENE00002297,WBGENE00002694,WBGENE00003777,WBGENE00003806,WBGENE00003902,WBGENE00004274,WBGENE00004357,WBGENE00004775,WBGENE00006528,WBGENE00006540,WBGENE00006795,WBGENE00006974,WBGENE00018869
GO:BP	fertilization	GO:0009566	0.003952	2.40318	19	1695	12	10296	WBGENE00001017,WBGENE00004274,WBGENE00004775,WBGENE00004963,WBGENE00004965,WBGENE00004976,WBGENE00006381,WBGENE00006888,WBGENE00006974,WBGENE00007117,WBGENE00013121,WBGENE00044067
GO:BP	mitotic spindle organization	GO:0007052	0.004372	2.35935	31	1695	16	10296	WBGENE00000257,WBGENE00000875,WBGENE00004952,WBGENE00004953,WBGENE00006381,WBGENE00006540,WBGENE00006974,WBGENE00006994,WBGENE00008053,WBGENE00010198,WBGENE00012191,WBGENE00015515,WBGENE00019940,WBGENE00020392,WBGENE00021460,WBGENE00021470
GO:BP	carboxylic acid metabolic process	GO:0019752	0.004641	2.33341	358	1695	91	10296	WBGENE00000112,WBGENE00000198,WBGENE00000800,WBGENE00000833,WBGENE00001094,WBGENE00001153,WBGENE00001239,WBGENE00001245,WBGENE00001246,WBGENE00001503,WBGENE00001603,WBGENE00001839,WBGENE00002183,WBGENE00002238,WBGENE00003162,WBGENE00003214,WBGENE00003815,WBGENE00004076,WBGENE00004189,WBGENE00004259,WBGENE00005022,WBGENE00006409,WBGENE00006518,WBGENE00006601,WBGENE00006617,WBGENE00007363,WBGENE000…
GO:BP	lipid localization	GO:0010876	0.004708	2.32714	110	1695	37	10296	WBGENE00000019,WBGENE00000020,WBGENE00000023,WBGENE00001153,WBGENE00002263,WBGENE00003061,WBGENE00003064,WBGENE00003065,WBGENE00006452,WBGENE00007144,WBGENE00008274,WBGENE00008670,WBGENE00008832,WBGENE00008856,WBGENE00009140,WBGENE00009218,WBGENE00009404,WBGENE00009498,WBGENE00009753,WBGENE00010425,WBGENE00011040,WBGENE00011827,WBGENE00012360,WBGENE00012930,WBGENE00013034,WBGENE00013052,WBGENE000…
GO:BP	microtubule cytoskeleton organization	GO:0000226	0.004731	2.325	144	1695	45	10296	WBGENE00000248,WBGENE00000257,WBGENE00000419,WBGENE00000502,WBGENE00000549,WBGENE00000875,WBGENE00001007,WBGENE00001017,WBGENE00001829,WBGENE00001830,WBGENE00001862,WBGENE00002214,WBGENE00002219,WBGENE00002229,WBGENE00002845,WBGENE00003902,WBGENE00003917,WBGENE00004732,WBGENE00004767,WBGENE00004775,WBGENE00004807,WBGENE00004808,WBGENE00004952,WBGENE00004953,WBGENE00004955,WBGENE00006311,WBGENE000…
GO:BP	spermatid development	GO:0007286	0.004821	2.31682	14	1695	10	10296	WBGENE00002059,WBGENE00004958,WBGENE00004962,WBGENE00004964,WBGENE00004966,WBGENE00004969,WBGENE00004971,WBGENE00004974,WBGENE00004975,WBGENE00013747
GO:BP	single fertilization	GO:0007338	0.004821	2.31682	14	1695	10	10296	WBGENE00001017,WBGENE00004274,WBGENE00004775,WBGENE00004963,WBGENE00004965,WBGENE00004976,WBGENE00006381,WBGENE00006974,WBGENE00007117,WBGENE00013121
GO:BP	oxoacid metabolic process	GO:0043436	0.005237	2.28091	359	1695	91	10296	WBGENE00000112,WBGENE00000198,WBGENE00000800,WBGENE00000833,WBGENE00001094,WBGENE00001153,WBGENE00001239,WBGENE00001245,WBGENE00001246,WBGENE00001503,WBGENE00001603,WBGENE00001839,WBGENE00002183,WBGENE00002238,WBGENE00003162,WBGENE00003214,WBGENE00003815,WBGENE00004076,WBGENE00004189,WBGENE00004259,WBGENE00005022,WBGENE00006409,WBGENE00006518,WBGENE00006601,WBGENE00006617,WBGENE00007363,WBGENE000…
GO:BP	intracellular protein transmembrane transport	GO:0065002	0.006493	2.18754	35	1695	17	10296	WBGENE00001047,WBGENE00001303,WBGENE00007683,WBGENE00007686,WBGENE00007696,WBGENE00007927,WBGENE00008857,WBGENE00009012,WBGENE00009092,WBGENE00009313,WBGENE00009734,WBGENE00011897,WBGENE00013311,WBGENE00016318,WBGENE00019305,WBGENE00020383,WBGENE00021427
GO:BP	positive regulation of protein metabolic process	GO:0051247	0.006813	2.16668	120	1695	39	10296	WBGENE00000500,WBGENE00001511,WBGENE00002064,WBGENE00002162,WBGENE00002238,WBGENE00002583,WBGENE00004409,WBGENE00004506,WBGENE00006577,WBGENE00006579,WBGENE00006713,WBGENE00006734,WBGENE00007009,WBGENE00007428,WBGENE00007791,WBGENE00007969,WBGENE00008871,WBGENE00009650,WBGENE00010198,WBGENE00011828,WBGENE00012115,WBGENE00013132,WBGENE00013538,WBGENE00015326,WBGENE00015688,WBGENE00016156,WBGENE000…
GO:BP	regulation of mRNA processing	GO:0050684	0.008758	2.05759	39	1695	18	10296	WBGENE00001259,WBGENE00004424,WBGENE00004698,WBGENE00004701,WBGENE00004705,WBGENE00004980,WBGENE00006697,WBGENE00010046,WBGENE00012245,WBGENE00013325,WBGENE00013808,WBGENE00015557,WBGENE00017816,WBGENE00019509,WBGENE00022019,WBGENE00022101,WBGENE00022738,WBGENE00044674
GO:BP	meiotic nuclear division	GO:0140013	0.009008	2.04539	84	1695	30	10296	WBGENE00000226,WBGENE00000875,WBGENE00001829,WBGENE00001830,WBGENE00001862,WBGENE00001867,WBGENE00002201,WBGENE00002214,WBGENE00002219,WBGENE00002229,WBGENE00003499,WBGENE00004320,WBGENE00004737,WBGENE00004738,WBGENE00004775,WBGENE00004960,WBGENE00004985,WBGENE00006376,WBGENE00006377,WBGENE00006974,WBGENE00007278,WBGENE00007307,WBGENE00007733,WBGENE00010785,WBGENE00011576,WBGENE00012191,WBGENE000…
GO:BP	regulation of cell cycle process	GO:0010564	0.009421	2.0259	113	1695	37	10296	WBGENE00000257,WBGENE00000275,WBGENE00000389,WBGENE00000498,WBGENE00000517,WBGENE00001862,WBGENE00002201,WBGENE00002219,WBGENE00002297,WBGENE00003793,WBGENE00003806,WBGENE00003902,WBGENE00004178,WBGENE00004320,WBGENE00004738,WBGENE00004767,WBGENE00004775,WBGENE00004807,WBGENE00004808,WBGENE00006311,WBGENE00006376,WBGENE00006528,WBGENE00006540,WBGENE00006974,WBGENE00007028,WBGENE00010198,WBGENE000…
GO:BP	glycerolipid metabolic process	GO:0046486	0.010518	1.97806	122	1695	39	10296	WBGENE00000184,WBGENE00000226,WBGENE00004040,WBGENE00004272,WBGENE00006491,WBGENE00007189,WBGENE00007912,WBGENE00008346,WBGENE00008431,WBGENE00008581,WBGENE00008765,WBGENE00008918,WBGENE00009207,WBGENE00009262,WBGENE00009264,WBGENE00010425,WBGENE00010915,WBGENE00011232,WBGENE00011482,WBGENE00011835,WBGENE00011860,WBGENE00011914,WBGENE00015241,WBGENE00018006,WBGENE00018131,WBGENE00019151,WBGENE000…
GO:BP	organophosphate ester transport	GO:0015748	0.011012	1.95815	43	1695	19	10296	WBGENE00006439,WBGENE00007144,WBGENE00008856,WBGENE00009498,WBGENE00009753,WBGENE00010459,WBGENE00010485,WBGENE00011662,WBGENE00011827,WBGENE00012033,WBGENE00012360,WBGENE00013034,WBGENE00013052,WBGENE00018827,WBGENE00019530,WBGENE00019531,WBGENE00020140,WBGENE00021854,WBGENE00022155
GO:BP	kinetochore organization	GO:0051383	0.011205	1.95059	10	1695	8	10296	WBGENE00001829,WBGENE00012191,WBGENE00015515,WBGENE00017832,WBGENE00020064,WBGENE00020392,WBGENE00021460,WBGENE00021648
GO:BP	nucleobase-containing compound transport	GO:0015931	0.011757	1.9297	85	1695	30	10296	WBGENE00000121,WBGENE00000122,WBGENE00003793,WBGENE00003806,WBGENE00005025,WBGENE00005153,WBGENE00006439,WBGENE00007195,WBGENE00009092,WBGENE00009313,WBGENE00010459,WBGENE00010485,WBGENE00010510,WBGENE00011662,WBGENE00012033,WBGENE00013740,WBGENE00014139,WBGENE00015038,WBGENE00015329,WBGENE00015404,WBGENE00015813,WBGENE00017642,WBGENE00017746,WBGENE00018156,WBGENE00018391,WBGENE00018827,WBGENE000…
GO:BP	cellular homeostasis	GO:0019725	0.012083	1.91781	140	1695	43	10296	WBGENE00003153,WBGENE00003735,WBGENE00004063,WBGENE00004736,WBGENE00004888,WBGENE00004959,WBGENE00004976,WBGENE00006487,WBGENE00006504,WBGENE00006601,WBGENE00006768,WBGENE00006833,WBGENE00006911,WBGENE00006918,WBGENE00007099,WBGENE00007248,WBGENE00007333,WBGENE00008074,WBGENE00008274,WBGENE00008780,WBGENE00009045,WBGENE00009238,WBGENE00009920,WBGENE00010130,WBGENE00010778,WBGENE00010794,WBGENE000…
GO:BP	posttranslational protein targeting to endoplasmic reticulum membrane	GO:0006620	0.012667	1.89733	6	1695	6	10296	WBGENE00001047,WBGENE00001303,WBGENE00007683,WBGENE00013311,WBGENE00019893,WBGENE00021427
GO:BP	glycerophospholipid metabolic process	GO:0006650	0.013558	1.8678	102	1695	34	10296	WBGENE00000184,WBGENE00000226,WBGENE00004040,WBGENE00004272,WBGENE00006491,WBGENE00007189,WBGENE00007912,WBGENE00008346,WBGENE00008431,WBGENE00008581,WBGENE00008765,WBGENE00008918,WBGENE00009207,WBGENE00009262,WBGENE00009264,WBGENE00010915,WBGENE00011482,WBGENE00011835,WBGENE00011860,WBGENE00011914,WBGENE00018006,WBGENE00018131,WBGENE00019255,WBGENE00019806,WBGENE00020375,WBGENE00021215,WBGENE000…
GO:BP	homeostatic process	GO:0042592	0.013892	1.85723	181	1695	52	10296	WBGENE00003153,WBGENE00003735,WBGENE00004063,WBGENE00004076,WBGENE00004736,WBGENE00004888,WBGENE00004959,WBGENE00004976,WBGENE00006487,WBGENE00006504,WBGENE00006601,WBGENE00006768,WBGENE00006833,WBGENE00006911,WBGENE00006918,WBGENE00006941,WBGENE00007099,WBGENE00007248,WBGENE00007333,WBGENE00008074,WBGENE00008274,WBGENE00008410,WBGENE00008780,WBGENE00009045,WBGENE00009218,WBGENE00009238,WBGENE000…
GO:BP	carbohydrate derivative biosynthetic process	GO:1901137	0.014571	1.8365	304	1695	78	10296	WBGENE00000206,WBGENE00000209,WBGENE00000229,WBGENE00000230,WBGENE00000270,WBGENE00000392,WBGENE00000869,WBGENE00001505,WBGENE00001632,WBGENE00001639,WBGENE00001645,WBGENE00002879,WBGENE00004076,WBGENE00005019,WBGENE00005020,WBGENE00005022,WBGENE00005025,WBGENE00006601,WBGENE00006768,WBGENE00006919,WBGENE00007043,WBGENE00007089,WBGENE00007102,WBGENE00007189,WBGENE00007385,WBGENE00007824,WBGENE000…
GO:BP	localization within membrane	GO:0051668	0.01496	1.82508	128	1695	40	10296	WBGENE00000184,WBGENE00001047,WBGENE00001303,WBGENE00001333,WBGENE00001662,WBGENE00004272,WBGENE00004373,WBGENE00004964,WBGENE00006572,WBGENE00007270,WBGENE00007637,WBGENE00007683,WBGENE00007696,WBGENE00008164,WBGENE00009012,WBGENE00009098,WBGENE00009521,WBGENE00010097,WBGENE00010323,WBGENE00010631,WBGENE00010892,WBGENE00011488,WBGENE00013311,WBGENE00014075,WBGENE00014119,WBGENE00017799,WBGENE000…
GO:BP	cytoskeleton-dependent cytokinesis	GO:0061640	0.015509	1.8094	27	1695	14	10296	WBGENE00000875,WBGENE00002180,WBGENE00002214,WBGENE00002219,WBGENE00002297,WBGENE00002694,WBGENE00003777,WBGENE00003902,WBGENE00004274,WBGENE00004357,WBGENE00004775,WBGENE00006540,WBGENE00006795,WBGENE00006974
GO:BP	protein N-linked glycosylation	GO:0006487	0.015509	1.8094	27	1695	14	10296	WBGENE00001639,WBGENE00001645,WBGENE00007043,WBGENE00007102,WBGENE00009178,WBGENE00011638,WBGENE00013362,WBGENE00019276,WBGENE00019693,WBGENE00019725,WBGENE00020437,WBGENE00020683,WBGENE00021960,WBGENE00022793
GO:BP	developmental process involved in reproduction	GO:0003006	0.016209	1.79025	300	1695	77	10296	WBGENE00000183,WBGENE00000517,WBGENE00000534,WBGENE00001017,WBGENE00001249,WBGENE00001303,WBGENE00001413,WBGENE00001414,WBGENE00001996,WBGENE00002059,WBGENE00002694,WBGENE00002717,WBGENE00002845,WBGENE00003777,WBGENE00003784,WBGENE00003792,WBGENE00003831,WBGENE00003902,WBGENE00003964,WBGENE00003992,WBGENE00004046,WBGENE00004178,WBGENE00004204,WBGENE00004271,WBGENE00004272,WBGENE00004274,WBGENE000…
GO:BP	microtubule-based process	GO:0007017	0.016363	1.78615	205	1695	57	10296	WBGENE00000248,WBGENE00000257,WBGENE00000419,WBGENE00000502,WBGENE00000549,WBGENE00000875,WBGENE00000962,WBGENE00001005,WBGENE00001007,WBGENE00001017,WBGENE00001018,WBGENE00001829,WBGENE00001830,WBGENE00001862,WBGENE00002214,WBGENE00002219,WBGENE00002227,WBGENE00002229,WBGENE00002845,WBGENE00003902,WBGENE00003917,WBGENE00004320,WBGENE00004732,WBGENE00004767,WBGENE00004775,WBGENE00004807,WBGENE000…
GO:BP	pyruvate metabolic process	GO:0006090	0.016547	1.78129	24	1695	13	10296	WBGENE00006601,WBGENE00007824,WBGENE00008230,WBGENE00008780,WBGENE00009082,WBGENE00009126,WBGENE00011232,WBGENE00011510,WBGENE00011884,WBGENE00012983,WBGENE00017166,WBGENE00019151,WBGENE00020185
GO:BP	regulation of protein catabolic process	GO:0042176	0.016645	1.77871	55	1695	22	10296	WBGENE00000500,WBGENE00004458,WBGENE00004459,WBGENE00004460,WBGENE00004506,WBGENE00006724,WBGENE00006734,WBGENE00007009,WBGENE00007791,WBGENE00007969,WBGENE00008871,WBGENE00011071,WBGENE00013538,WBGENE00015326,WBGENE00015688,WBGENE00016156,WBGENE00016158,WBGENE00017733,WBGENE00018586,WBGENE00019556,WBGENE00022069,WBGENE00022358
GO:BP	cytokinetic process	GO:0032506	0.021159	1.6745	13	1695	9	10296	WBGENE00000875,WBGENE00002219,WBGENE00002297,WBGENE00003806,WBGENE00003902,WBGENE00004274,WBGENE00004357,WBGENE00006540,WBGENE00006974
GO:BP	embryo development ending in birth or egg hatching	GO:0009792	0.021217	1.67332	179	1695	51	10296	WBGENE00000123,WBGENE00000160,WBGENE00000183,WBGENE00000392,WBGENE00001093,WBGENE00001860,WBGENE00002694,WBGENE00003153,WBGENE00003196,WBGENE00003499,WBGENE00003777,WBGENE00003792,WBGENE00003793,WBGENE00003806,WBGENE00004274,WBGENE00004700,WBGENE00004732,WBGENE00004736,WBGENE00004781,WBGENE00004808,WBGENE00004888,WBGENE00004952,WBGENE00004953,WBGENE00004980,WBGENE00005019,WBGENE00005020,WBGENE000…
GO:BP	Golgi organization	GO:0007030	0.025071	1.60082	38	1695	17	10296	WBGENE00000585,WBGENE00002070,WBGENE00008136,WBGENE00008346,WBGENE00009336,WBGENE00009829,WBGENE00010631,WBGENE00010670,WBGENE00010713,WBGENE00011975,WBGENE00013360,WBGENE00013985,WBGENE00018017,WBGENE00019003,WBGENE00021536,WBGENE00021644,WBGENE00043064
GO:BP	monocarboxylic acid metabolic process	GO:0032787	0.025566	1.59233	171	1695	49	10296	WBGENE00000198,WBGENE00001153,WBGENE00001239,WBGENE00001245,WBGENE00001246,WBGENE00002183,WBGENE00004076,WBGENE00006518,WBGENE00006601,WBGENE00007363,WBGENE00007824,WBGENE00007969,WBGENE00008230,WBGENE00008780,WBGENE00009082,WBGENE00009126,WBGENE00009187,WBGENE00009218,WBGENE00009342,WBGENE00009439,WBGENE00009952,WBGENE00010035,WBGENE00010317,WBGENE00010425,WBGENE00010809,WBGENE00011232,WBGENE000…
GO:BP	endoplasmic reticulum organization	GO:0007029	0.026336	1.57945	28	1695	14	10296	WBGENE00002070,WBGENE00007696,WBGENE00010254,WBGENE00010425,WBGENE00010579,WBGENE00011338,WBGENE00012345,WBGENE00012555,WBGENE00013740,WBGENE00017825,WBGENE00019607,WBGENE00019693,WBGENE00021428,WBGENE00021868
GO:BP	nucleoside diphosphate metabolic process	GO:0009132	0.02929	1.53328	25	1695	13	10296	WBGENE00002879,WBGENE00003580,WBGENE00006601,WBGENE00008230,WBGENE00008780,WBGENE00009119,WBGENE00009126,WBGENE00009575,WBGENE00011510,WBGENE00011884,WBGENE00017166,WBGENE00020185,WBGENE00020190
GO:BP	positive regulation of cellular protein metabolic process	GO:0032270	0.029412	1.53148	114	1695	36	10296	WBGENE00000500,WBGENE00001511,WBGENE00002064,WBGENE00002162,WBGENE00002238,WBGENE00002583,WBGENE00004409,WBGENE00004506,WBGENE00006577,WBGENE00006579,WBGENE00006713,WBGENE00006734,WBGENE00007428,WBGENE00007791,WBGENE00007969,WBGENE00008871,WBGENE00009650,WBGENE00010198,WBGENE00011828,WBGENE00012115,WBGENE00013132,WBGENE00013538,WBGENE00015326,WBGENE00015688,WBGENE00016156,WBGENE00016158,WBGENE000…
GO:BP	protein folding	GO:0006457	0.030902	1.51002	93	1695	31	10296	WBGENE00000379,WBGENE00000567,WBGENE00000802,WBGENE00000879,WBGENE00000885,WBGENE00000915,WBGENE00001028,WBGENE00001029,WBGENE00001030,WBGENE00001031,WBGENE00001037,WBGENE00001038,WBGENE00001046,WBGENE00001334,WBGENE00001426,WBGENE00001427,WBGENE00001431,WBGENE00002010,WBGENE00003870,WBGENE00003964,WBGENE00006059,WBGENE00007235,WBGENE00007927,WBGENE00009435,WBGENE00011480,WBGENE00011735,WBGENE000…
GO:BP	lipid biosynthetic process	GO:0008610	0.03433	1.46433	182	1695	51	10296	WBGENE00000184,WBGENE00000198,WBGENE00000226,WBGENE00001239,WBGENE00001245,WBGENE00001246,WBGENE00004040,WBGENE00004076,WBGENE00004272,WBGENE00006518,WBGENE00007102,WBGENE00007189,WBGENE00007363,WBGENE00007912,WBGENE00007918,WBGENE00008346,WBGENE00008431,WBGENE00008743,WBGENE00008765,WBGENE00008918,WBGENE00009207,WBGENE00009262,WBGENE00009342,WBGENE00009439,WBGENE00009505,WBGENE00010425,WBGENE000…
GO:BP	centromere complex assembly	GO:0034508	0.035121	1.45443	11	1695	8	10296	WBGENE00001829,WBGENE00007500,WBGENE00015515,WBGENE00017832,WBGENE00020064,WBGENE00020392,WBGENE00021460,WBGENE00021648
GO:BP	regulation of cellular catabolic process	GO:0031329	0.04116	1.38552	107	1695	34	10296	WBGENE00000376,WBGENE00000500,WBGENE00002583,WBGENE00002845,WBGENE00004506,WBGENE00004879,WBGENE00006414,WBGENE00006499,WBGENE00006724,WBGENE00006734,WBGENE00007791,WBGENE00007969,WBGENE00008871,WBGENE00010923,WBGENE00011071,WBGENE00011604,WBGENE00012497,WBGENE00012732,WBGENE00013538,WBGENE00014015,WBGENE00015326,WBGENE00015688,WBGENE00015943,WBGENE00016156,WBGENE00016158,WBGENE00017733,WBGENE000…
GO:BP	response to organonitrogen compound	GO:0010243	0.043664	1.35988	82	1695	28	10296	WBGENE00004272,WBGENE00004381,WBGENE00004504,WBGENE00004759,WBGENE00004768,WBGENE00006414,WBGENE00006703,WBGENE00006733,WBGENE00006734,WBGENE00007390,WBGENE00007574,WBGENE00007626,WBGENE00008053,WBGENE00008148,WBGENE00008852,WBGENE00009178,WBGENE00010425,WBGENE00012497,WBGENE00013667,WBGENE00013881,WBGENE00014031,WBGENE00014204,WBGENE00015126,WBGENE00018611,WBGENE00018847,WBGENE00019893,WBGENE000…
GO:CC	cytoplasm	GO:0005737	8.97e-100	99.0471	3514	1959	1027	11201	WBGENE00000097,WBGENE00000101,WBGENE00000112,WBGENE00000114,WBGENE00000150,WBGENE00000155,WBGENE00000158,WBGENE00000160,WBGENE00000184,WBGENE00000198,WBGENE00000206,WBGENE00000209,WBGENE00000228,WBGENE00000230,WBGENE00000231,WBGENE00000248,WBGENE00000259,WBGENE00000270,WBGENE00000293,WBGENE00000376,WBGENE00000379,WBGENE00000389,WBGENE00000392,WBGENE00000419,WBGENE00000464,WBGENE00000472,WBGENE000…
GO:CC	intracellular anatomical structure	GO:0005622	1.15e-77	76.939	5578	1959	1352	11201	WBGENE00000019,WBGENE00000020,WBGENE00000023,WBGENE00000097,WBGENE00000101,WBGENE00000112,WBGENE00000114,WBGENE00000121,WBGENE00000122,WBGENE00000123,WBGENE00000144,WBGENE00000150,WBGENE00000155,WBGENE00000158,WBGENE00000160,WBGENE00000184,WBGENE00000198,WBGENE00000206,WBGENE00000209,WBGENE00000226,WBGENE00000228,WBGENE00000229,WBGENE00000230,WBGENE00000231,WBGENE00000248,WBGENE00000257,WBGENE000…
GO:CC	intracellular organelle	GO:0043229	8.71e-56	55.0599	4765	1959	1154	11201	WBGENE00000019,WBGENE00000020,WBGENE00000023,WBGENE00000097,WBGENE00000101,WBGENE00000112,WBGENE00000114,WBGENE00000121,WBGENE00000122,WBGENE00000123,WBGENE00000144,WBGENE00000150,WBGENE00000158,WBGENE00000184,WBGENE00000198,WBGENE00000206,WBGENE00000209,WBGENE00000226,WBGENE00000228,WBGENE00000230,WBGENE00000248,WBGENE00000257,WBGENE00000270,WBGENE00000293,WBGENE00000376,WBGENE00000389,WBGENE000…
GO:CC	organelle	GO:0043226	1.3e-52	51.8875	4839	1959	1158	11201	WBGENE00000019,WBGENE00000020,WBGENE00000023,WBGENE00000097,WBGENE00000101,WBGENE00000112,WBGENE00000114,WBGENE00000121,WBGENE00000122,WBGENE00000123,WBGENE00000144,WBGENE00000150,WBGENE00000158,WBGENE00000184,WBGENE00000198,WBGENE00000206,WBGENE00000209,WBGENE00000226,WBGENE00000228,WBGENE00000230,WBGENE00000248,WBGENE00000257,WBGENE00000270,WBGENE00000293,WBGENE00000376,WBGENE00000389,WBGENE000…
GO:CC	organelle membrane	GO:0031090	1.66e-47	46.7795	806	1959	311	11201	WBGENE00000101,WBGENE00000158,WBGENE00000184,WBGENE00000198,WBGENE00000206,WBGENE00000209,WBGENE00000230,WBGENE00000270,WBGENE00000464,WBGENE00000869,WBGENE00000896,WBGENE00000985,WBGENE00001239,WBGENE00001245,WBGENE00001246,WBGENE00001303,WBGENE00001334,WBGENE00001414,WBGENE00001424,WBGENE00001509,WBGENE00001632,WBGENE00001645,WBGENE00001662,WBGENE00001996,WBGENE00002070,WBGENE00002162,WBGENE000…
GO:CC	intracellular membrane-bounded organelle	GO:0043231	3.34e-35	34.4765	4145	1959	976	11201	WBGENE00000019,WBGENE00000020,WBGENE00000023,WBGENE00000097,WBGENE00000101,WBGENE00000112,WBGENE00000114,WBGENE00000121,WBGENE00000122,WBGENE00000123,WBGENE00000144,WBGENE00000150,WBGENE00000158,WBGENE00000184,WBGENE00000198,WBGENE00000206,WBGENE00000209,WBGENE00000226,WBGENE00000230,WBGENE00000257,WBGENE00000270,WBGENE00000376,WBGENE00000389,WBGENE00000464,WBGENE00000467,WBGENE00000472,WBGENE000…
GO:CC	endomembrane system	GO:0012505	2.38e-32	31.6241	931	1959	310	11201	WBGENE00000097,WBGENE00000101,WBGENE00000158,WBGENE00000184,WBGENE00000198,WBGENE00000270,WBGENE00000464,WBGENE00000472,WBGENE00000567,WBGENE00000802,WBGENE00000896,WBGENE00001046,WBGENE00001047,WBGENE00001239,WBGENE00001245,WBGENE00001246,WBGENE00001303,WBGENE00001334,WBGENE00001632,WBGENE00001639,WBGENE00001645,WBGENE00001867,WBGENE00001996,WBGENE00002070,WBGENE00003735,WBGENE00003792,WBGENE000…
GO:CC	membrane-bounded organelle	GO:0043227	9.5e-32	31.0224	4252	1959	983	11201	WBGENE00000019,WBGENE00000020,WBGENE00000023,WBGENE00000097,WBGENE00000101,WBGENE00000112,WBGENE00000114,WBGENE00000121,WBGENE00000122,WBGENE00000123,WBGENE00000144,WBGENE00000150,WBGENE00000158,WBGENE00000184,WBGENE00000198,WBGENE00000206,WBGENE00000209,WBGENE00000226,WBGENE00000230,WBGENE00000257,WBGENE00000270,WBGENE00000376,WBGENE00000389,WBGENE00000464,WBGENE00000467,WBGENE00000472,WBGENE000…
GO:CC	protein-containing complex	GO:0032991	9.95e-31	30.0021	1952	1959	532	11201	WBGENE00000123,WBGENE00000144,WBGENE00000150,WBGENE00000158,WBGENE00000160,WBGENE00000206,WBGENE00000209,WBGENE00000229,WBGENE00000230,WBGENE00000293,WBGENE00000369,WBGENE00000376,WBGENE00000379,WBGENE00000419,WBGENE00000475,WBGENE00000836,WBGENE00000837,WBGENE00000838,WBGENE00000869,WBGENE00000875,WBGENE00000896,WBGENE00000938,WBGENE00000962,WBGENE00001005,WBGENE00001007,WBGENE00001017,WBGENE000…
GO:CC	membrane protein complex	GO:0098796	2.74e-30	29.5626	353	1959	156	11201	WBGENE00000150,WBGENE00000158,WBGENE00000160,WBGENE00000206,WBGENE00000209,WBGENE00000229,WBGENE00000230,WBGENE00000869,WBGENE00000896,WBGENE00001303,WBGENE00001662,WBGENE00002162,WBGENE00003061,WBGENE00003225,WBGENE00003403,WBGENE00003806,WBGENE00003831,WBGENE00004754,WBGENE00004755,WBGENE00004756,WBGENE00004759,WBGENE00004768,WBGENE00004899,WBGENE00004959,WBGENE00004976,WBGENE00006311,WBGENE000…
GO:CC	endoplasmic reticulum	GO:0005783	8.66e-30	29.0625	463	1959	186	11201	WBGENE00000097,WBGENE00000198,WBGENE00000472,WBGENE00000567,WBGENE00000802,WBGENE00000896,WBGENE00001046,WBGENE00001047,WBGENE00001239,WBGENE00001245,WBGENE00001246,WBGENE00001303,WBGENE00001334,WBGENE00002070,WBGENE00003806,WBGENE00003870,WBGENE00003906,WBGENE00003964,WBGENE00004063,WBGENE00004076,WBGENE00004381,WBGENE00004441,WBGENE00004490,WBGENE00004492,WBGENE00004497,WBGENE00004681,WBGENE000…
GO:CC	organelle subcompartment	GO:0031984	5.35e-26	25.2715	302	1959	134	11201	WBGENE00000198,WBGENE00000896,WBGENE00001239,WBGENE00001245,WBGENE00001246,WBGENE00001303,WBGENE00001334,WBGENE00001639,WBGENE00001645,WBGENE00002070,WBGENE00003806,WBGENE00003906,WBGENE00004076,WBGENE00004274,WBGENE00004441,WBGENE00004497,WBGENE00004736,WBGENE00004754,WBGENE00004755,WBGENE00004756,WBGENE00004759,WBGENE00004768,WBGENE00004958,WBGENE00006733,WBGENE00006802,WBGENE00006833,WBGENE000…
GO:CC	organelle envelope	GO:0031967	6.91e-24	23.1604	273	1959	122	11201	WBGENE00000206,WBGENE00000209,WBGENE00000230,WBGENE00000869,WBGENE00000985,WBGENE00001424,WBGENE00001509,WBGENE00001662,WBGENE00001867,WBGENE00001996,WBGENE00002162,WBGENE00003061,WBGENE00003792,WBGENE00003793,WBGENE00003796,WBGENE00003805,WBGENE00003806,WBGENE00003831,WBGENE00003870,WBGENE00004736,WBGENE00004775,WBGENE00004931,WBGENE00004958,WBGENE00006311,WBGENE00006433,WBGENE00006439,WBGENE000…
GO:CC	envelope	GO:0031975	6.91e-24	23.1604	273	1959	122	11201	WBGENE00000206,WBGENE00000209,WBGENE00000230,WBGENE00000869,WBGENE00000985,WBGENE00001424,WBGENE00001509,WBGENE00001662,WBGENE00001867,WBGENE00001996,WBGENE00002162,WBGENE00003061,WBGENE00003792,WBGENE00003793,WBGENE00003796,WBGENE00003805,WBGENE00003806,WBGENE00003831,WBGENE00003870,WBGENE00004736,WBGENE00004775,WBGENE00004931,WBGENE00004958,WBGENE00006311,WBGENE00006433,WBGENE00006439,WBGENE000…
GO:CC	endoplasmic reticulum membrane	GO:0005789	5e-23	22.3013	244	1959	112	11201	WBGENE00000198,WBGENE00000896,WBGENE00001239,WBGENE00001245,WBGENE00001246,WBGENE00001303,WBGENE00001334,WBGENE00002070,WBGENE00003806,WBGENE00003906,WBGENE00004076,WBGENE00004441,WBGENE00004497,WBGENE00004736,WBGENE00004754,WBGENE00004755,WBGENE00004756,WBGENE00004759,WBGENE00004768,WBGENE00004958,WBGENE00006733,WBGENE00007102,WBGENE00007189,WBGENE00007626,WBGENE00007683,WBGENE00007696,WBGENE000…
GO:CC	nuclear outer membrane-endoplasmic reticulum membrane network	GO:0042175	6.6e-23	22.1803	248	1959	113	11201	WBGENE00000198,WBGENE00000896,WBGENE00001239,WBGENE00001245,WBGENE00001246,WBGENE00001303,WBGENE00001334,WBGENE00002070,WBGENE00003806,WBGENE00003906,WBGENE00004076,WBGENE00004441,WBGENE00004497,WBGENE00004736,WBGENE00004754,WBGENE00004755,WBGENE00004756,WBGENE00004759,WBGENE00004768,WBGENE00004958,WBGENE00006733,WBGENE00007102,WBGENE00007189,WBGENE00007626,WBGENE00007683,WBGENE00007696,WBGENE000…
GO:CC	endoplasmic reticulum subcompartment	GO:0098827	7.67e-23	22.1151	245	1959	112	11201	WBGENE00000198,WBGENE00000896,WBGENE00001239,WBGENE00001245,WBGENE00001246,WBGENE00001303,WBGENE00001334,WBGENE00002070,WBGENE00003806,WBGENE00003906,WBGENE00004076,WBGENE00004441,WBGENE00004497,WBGENE00004736,WBGENE00004754,WBGENE00004755,WBGENE00004756,WBGENE00004759,WBGENE00004768,WBGENE00004958,WBGENE00006733,WBGENE00007102,WBGENE00007189,WBGENE00007626,WBGENE00007683,WBGENE00007696,WBGENE000…
GO:CC	mitochondrial membrane	GO:0031966	7.96e-23	22.0993	193	1959	96	11201	WBGENE00000206,WBGENE00000209,WBGENE00000230,WBGENE00000869,WBGENE00000985,WBGENE00001424,WBGENE00001509,WBGENE00001662,WBGENE00002162,WBGENE00003061,WBGENE00003831,WBGENE00004931,WBGENE00004958,WBGENE00006433,WBGENE00006439,WBGENE00006463,WBGENE00006491,WBGENE00006519,WBGENE00006572,WBGENE00007080,WBGENE00007385,WBGENE00007622,WBGENE00007686,WBGENE00007880,WBGENE00007918,WBGENE00007927,WBGENE000…
GO:CC	mitochondrial envelope	GO:0005740	9.08e-23	22.0421	206	1959	100	11201	WBGENE00000206,WBGENE00000209,WBGENE00000230,WBGENE00000869,WBGENE00000985,WBGENE00001424,WBGENE00001509,WBGENE00001662,WBGENE00002162,WBGENE00003061,WBGENE00003831,WBGENE00004931,WBGENE00004958,WBGENE00006433,WBGENE00006439,WBGENE00006463,WBGENE00006491,WBGENE00006519,WBGENE00006572,WBGENE00007080,WBGENE00007144,WBGENE00007385,WBGENE00007622,WBGENE00007686,WBGENE00007880,WBGENE00007918,WBGENE000…
GO:CC	catalytic complex	GO:1902494	7.37e-20	19.1327	552	1959	188	11201	WBGENE00000123,WBGENE00000144,WBGENE00000836,WBGENE00000837,WBGENE00000838,WBGENE00000869,WBGENE00000896,WBGENE00000938,WBGENE00000962,WBGENE00001005,WBGENE00001007,WBGENE00001017,WBGENE00002162,WBGENE00002344,WBGENE00002717,WBGENE00003025,WBGENE00003061,WBGENE00003225,WBGENE00003509,WBGENE00003831,WBGENE00003922,WBGENE00003923,WBGENE00003924,WBGENE00003925,WBGENE00003926,WBGENE00003927,WBGENE000…
GO:CC	cytosolic ribosome	GO:0022626	1.29e-19	18.8908	78	1959	52	11201	WBGENE00004408,WBGENE00004409,WBGENE00004410,WBGENE00004412,WBGENE00004414,WBGENE00004415,WBGENE00004416,WBGENE00004418,WBGENE00004419,WBGENE00004420,WBGENE00004422,WBGENE00004424,WBGENE00004425,WBGENE00004426,WBGENE00004428,WBGENE00004430,WBGENE00004431,WBGENE00004433,WBGENE00004441,WBGENE00004442,WBGENE00004444,WBGENE00004445,WBGENE00004446,WBGENE00004447,WBGENE00004448,WBGENE00004449,WBGENE000…
GO:CC	inner mitochondrial membrane protein complex	GO:0098800	1.71e-19	18.7667	86	1959	55	11201	WBGENE00000206,WBGENE00000209,WBGENE00000230,WBGENE00000869,WBGENE00002162,WBGENE00003061,WBGENE00003831,WBGENE00006433,WBGENE00006463,WBGENE00006519,WBGENE00007385,WBGENE00007880,WBGENE00007927,WBGENE00008164,WBGENE00008414,WBGENE00008857,WBGENE00009051,WBGENE00009161,WBGENE00009294,WBGENE00009712,WBGENE00009734,WBGENE00009739,WBGENE00009992,WBGENE00010326,WBGENE00011015,WBGENE00011273,WBGENE000…
GO:CC	mitochondrion	GO:0005739	1.97e-18	17.705	612	1959	199	11201	WBGENE00000112,WBGENE00000114,WBGENE00000206,WBGENE00000209,WBGENE00000230,WBGENE00000869,WBGENE00000985,WBGENE00001027,WBGENE00001093,WBGENE00001424,WBGENE00001509,WBGENE00001662,WBGENE00002162,WBGENE00002183,WBGENE00002238,WBGENE00003061,WBGENE00003064,WBGENE00003831,WBGENE00004930,WBGENE00004931,WBGENE00004958,WBGENE00006059,WBGENE00006433,WBGENE00006439,WBGENE00006463,WBGENE00006491,WBGENE000…
GO:CC	oxidoreductase complex	GO:1990204	5.86e-18	17.2324	60	1959	43	11201	WBGENE00000869,WBGENE00002162,WBGENE00003061,WBGENE00003225,WBGENE00003831,WBGENE00006433,WBGENE00006463,WBGENE00006518,WBGENE00007824,WBGENE00007880,WBGENE00008414,WBGENE00009051,WBGENE00009082,WBGENE00009294,WBGENE00009712,WBGENE00009739,WBGENE00009918,WBGENE00009992,WBGENE00010326,WBGENE00010778,WBGENE00012031,WBGENE00012166,WBGENE00013049,WBGENE00013237,WBGENE00013308,WBGENE00013406,WBGENE000…
GO:CC	mitochondrial respirasome	GO:0005746	3.07e-17	16.5132	50	1959	38	11201	WBGENE00000869,WBGENE00002162,WBGENE00003061,WBGENE00003831,WBGENE00004931,WBGENE00006433,WBGENE00006463,WBGENE00006519,WBGENE00007880,WBGENE00008414,WBGENE00009051,WBGENE00009161,WBGENE00009294,WBGENE00009712,WBGENE00009739,WBGENE00009992,WBGENE00010326,WBGENE00012166,WBGENE00012354,WBGENE00012553,WBGENE00013237,WBGENE00013308,WBGENE00013406,WBGENE00014086,WBGENE00015755,WBGENE00015810,WBGENE000…
GO:CC	organelle inner membrane	GO:0019866	4.07e-17	16.3907	179	1959	83	11201	WBGENE00000206,WBGENE00000209,WBGENE00000230,WBGENE00000869,WBGENE00000985,WBGENE00001996,WBGENE00002162,WBGENE00003061,WBGENE00003831,WBGENE00004931,WBGENE00004958,WBGENE00006311,WBGENE00006433,WBGENE00006439,WBGENE00006463,WBGENE00006519,WBGENE00006572,WBGENE00007080,WBGENE00007385,WBGENE00007622,WBGENE00007880,WBGENE00007927,WBGENE00008137,WBGENE00008164,WBGENE00008410,WBGENE00008414,WBGENE000…
GO:CC	mitochondrial inner membrane	GO:0005743	4.79e-17	16.32	163	1959	78	11201	WBGENE00000206,WBGENE00000209,WBGENE00000230,WBGENE00000869,WBGENE00000985,WBGENE00002162,WBGENE00003061,WBGENE00003831,WBGENE00004931,WBGENE00004958,WBGENE00006433,WBGENE00006439,WBGENE00006463,WBGENE00006519,WBGENE00006572,WBGENE00007080,WBGENE00007385,WBGENE00007622,WBGENE00007880,WBGENE00007927,WBGENE00008137,WBGENE00008164,WBGENE00008410,WBGENE00008414,WBGENE00008505,WBGENE00008857,WBGENE000…
GO:CC	respirasome	GO:0070469	5.13e-17	16.2902	55	1959	40	11201	WBGENE00000869,WBGENE00002162,WBGENE00003061,WBGENE00003225,WBGENE00003831,WBGENE00004931,WBGENE00006433,WBGENE00006463,WBGENE00006519,WBGENE00007880,WBGENE00008414,WBGENE00009051,WBGENE00009161,WBGENE00009294,WBGENE00009712,WBGENE00009739,WBGENE00009992,WBGENE00010326,WBGENE00012166,WBGENE00012354,WBGENE00012553,WBGENE00013237,WBGENE00013308,WBGENE00013406,WBGENE00014086,WBGENE00015755,WBGENE000…
GO:CC	endoplasmic reticulum protein-containing complex	GO:0140534	1.79e-16	15.7482	47	1959	36	11201	WBGENE00000896,WBGENE00001303,WBGENE00004759,WBGENE00004768,WBGENE00006733,WBGENE00007189,WBGENE00008053,WBGENE00008431,WBGENE00008918,WBGENE00008990,WBGENE00009118,WBGENE00009521,WBGENE00011306,WBGENE00011482,WBGENE00011860,WBGENE00011914,WBGENE00011932,WBGENE00012550,WBGENE00013311,WBGENE00013378,WBGENE00014249,WBGENE00016395,WBGENE00016439,WBGENE00017999,WBGENE00018006,WBGENE00019209,WBGENE000…
GO:CC	respiratory chain complex	GO:0098803	3.1e-16	15.509	52	1959	38	11201	WBGENE00000869,WBGENE00002162,WBGENE00003061,WBGENE00003225,WBGENE00003831,WBGENE00006433,WBGENE00006463,WBGENE00006519,WBGENE00007880,WBGENE00008414,WBGENE00009051,WBGENE00009161,WBGENE00009294,WBGENE00009712,WBGENE00009739,WBGENE00009992,WBGENE00010326,WBGENE00012166,WBGENE00012354,WBGENE00012553,WBGENE00013237,WBGENE00013308,WBGENE00013406,WBGENE00014086,WBGENE00015755,WBGENE00015810,WBGENE000…
GO:CC	endopeptidase complex	GO:1905369	8.38e-15	14.0769	37	1959	30	11201	WBGENE00003922,WBGENE00003923,WBGENE00003924,WBGENE00003925,WBGENE00003926,WBGENE00003927,WBGENE00003928,WBGENE00003947,WBGENE00003948,WBGENE00003950,WBGENE00003951,WBGENE00003952,WBGENE00003953,WBGENE00004458,WBGENE00004459,WBGENE00004460,WBGENE00004461,WBGENE00004464,WBGENE00004465,WBGENE00004468,WBGENE00004504,WBGENE00004506,WBGENE00006856,WBGENE00008918,WBGENE00011482,WBGENE00011914,WBGENE000…
GO:CC	mitochondrial protein-containing complex	GO:0098798	8.26e-14	13.0831	167	1959	74	11201	WBGENE00000206,WBGENE00000209,WBGENE00000230,WBGENE00000869,WBGENE00001662,WBGENE00002162,WBGENE00003061,WBGENE00003831,WBGENE00006433,WBGENE00006463,WBGENE00006518,WBGENE00006519,WBGENE00007385,WBGENE00007444,WBGENE00007686,WBGENE00007824,WBGENE00007880,WBGENE00007927,WBGENE00008164,WBGENE00008414,WBGENE00008452,WBGENE00008459,WBGENE00008857,WBGENE00009051,WBGENE00009092,WBGENE00009161,WBGENE000…
GO:CC	bounding membrane of organelle	GO:0098588	1.14e-13	12.9417	378	1959	130	11201	WBGENE00000101,WBGENE00000158,WBGENE00000184,WBGENE00000270,WBGENE00000464,WBGENE00001303,WBGENE00001424,WBGENE00001509,WBGENE00001632,WBGENE00001645,WBGENE00001662,WBGENE00002070,WBGENE00003806,WBGENE00004063,WBGENE00004075,WBGENE00004101,WBGENE00004271,WBGENE00004272,WBGENE00004274,WBGENE00004373,WBGENE00004441,WBGENE00004497,WBGENE00004736,WBGENE00004754,WBGENE00004755,WBGENE00004756,WBGENE000…
GO:CC	proteasome complex	GO:0000502	9.95e-13	12.002	32	1959	26	11201	WBGENE00003922,WBGENE00003923,WBGENE00003924,WBGENE00003925,WBGENE00003926,WBGENE00003927,WBGENE00003928,WBGENE00003947,WBGENE00003948,WBGENE00003950,WBGENE00003951,WBGENE00003952,WBGENE00003953,WBGENE00004458,WBGENE00004459,WBGENE00004460,WBGENE00004461,WBGENE00004464,WBGENE00004465,WBGENE00004468,WBGENE00004504,WBGENE00004506,WBGENE00006856,WBGENE00015688,WBGENE00016981,WBGENE00018135
GO:CC	cytosolic large ribosomal subunit	GO:0022625	4.21e-12	11.3753	47	1959	32	11201	WBGENE00004408,WBGENE00004409,WBGENE00004410,WBGENE00004412,WBGENE00004414,WBGENE00004415,WBGENE00004416,WBGENE00004418,WBGENE00004419,WBGENE00004420,WBGENE00004422,WBGENE00004424,WBGENE00004425,WBGENE00004426,WBGENE00004428,WBGENE00004430,WBGENE00004431,WBGENE00004433,WBGENE00004441,WBGENE00004442,WBGENE00004444,WBGENE00004445,WBGENE00004446,WBGENE00004447,WBGENE00004448,WBGENE00004449,WBGENE000…
GO:CC	cytosol	GO:0005829	5.29e-12	11.2765	449	1959	143	11201	WBGENE00000379,WBGENE00000392,WBGENE00001029,WBGENE00001030,WBGENE00001031,WBGENE00001037,WBGENE00001094,WBGENE00002002,WBGENE00002066,WBGENE00002238,WBGENE00003902,WBGENE00003906,WBGENE00004075,WBGENE00004274,WBGENE00004408,WBGENE00004409,WBGENE00004410,WBGENE00004412,WBGENE00004414,WBGENE00004415,WBGENE00004416,WBGENE00004418,WBGENE00004419,WBGENE00004420,WBGENE00004422,WBGENE00004424,WBGENE000…
GO:CC	ribosomal subunit	GO:0044391	9.33e-12	11.0302	138	1959	62	11201	WBGENE00004408,WBGENE00004409,WBGENE00004410,WBGENE00004412,WBGENE00004414,WBGENE00004415,WBGENE00004416,WBGENE00004418,WBGENE00004419,WBGENE00004420,WBGENE00004422,WBGENE00004424,WBGENE00004425,WBGENE00004426,WBGENE00004428,WBGENE00004430,WBGENE00004431,WBGENE00004433,WBGENE00004441,WBGENE00004442,WBGENE00004444,WBGENE00004445,WBGENE00004446,WBGENE00004447,WBGENE00004448,WBGENE00004449,WBGENE000…
GO:CC	extrinsic component of cytoplasmic side of plasma membrane	GO:0031234	1.67e-11	10.7785	46	1959	31	11201	WBGENE00002193,WBGENE00002198,WBGENE00002204,WBGENE00002206,WBGENE00002208,WBGENE00004962,WBGENE00009039,WBGENE00009160,WBGENE00010712,WBGENE00011039,WBGENE00012010,WBGENE00012011,WBGENE00012172,WBGENE00012785,WBGENE00013475,WBGENE00013801,WBGENE00013811,WBGENE00015994,WBGENE00016085,WBGENE00016416,WBGENE00016462,WBGENE00016954,WBGENE00017736,WBGENE00018999,WBGENE00019081,WBGENE00020003,WBGENE000…
GO:CC	NADH dehydrogenase complex	GO:0030964	1.78e-11	10.7487	32	1959	25	11201	WBGENE00003061,WBGENE00003831,WBGENE00006463,WBGENE00007880,WBGENE00008414,WBGENE00009051,WBGENE00009294,WBGENE00009712,WBGENE00009992,WBGENE00010326,WBGENE00012166,WBGENE00013237,WBGENE00013308,WBGENE00013406,WBGENE00014086,WBGENE00015810,WBGENE00016118,WBGENE00016393,WBGENE00019401,WBGENE00020417,WBGENE00020636,WBGENE00021562,WBGENE00021839,WBGENE00021849,WBGENE00022075
GO:CC	respiratory chain complex I	GO:0045271	1.78e-11	10.7487	32	1959	25	11201	WBGENE00003061,WBGENE00003831,WBGENE00006463,WBGENE00007880,WBGENE00008414,WBGENE00009051,WBGENE00009294,WBGENE00009712,WBGENE00009992,WBGENE00010326,WBGENE00012166,WBGENE00013237,WBGENE00013308,WBGENE00013406,WBGENE00014086,WBGENE00015810,WBGENE00016118,WBGENE00016393,WBGENE00019401,WBGENE00020417,WBGENE00020636,WBGENE00021562,WBGENE00021839,WBGENE00021849,WBGENE00022075
GO:CC	mitochondrial respiratory chain complex I	GO:0005747	1.78e-11	10.7487	32	1959	25	11201	WBGENE00003061,WBGENE00003831,WBGENE00006463,WBGENE00007880,WBGENE00008414,WBGENE00009051,WBGENE00009294,WBGENE00009712,WBGENE00009992,WBGENE00010326,WBGENE00012166,WBGENE00013237,WBGENE00013308,WBGENE00013406,WBGENE00014086,WBGENE00015810,WBGENE00016118,WBGENE00016393,WBGENE00019401,WBGENE00020417,WBGENE00020636,WBGENE00021562,WBGENE00021839,WBGENE00021849,WBGENE00022075
GO:CC	cytoplasmic side of membrane	GO:0098562	2.34e-11	10.6307	65	1959	38	11201	WBGENE00000184,WBGENE00002193,WBGENE00002198,WBGENE00002204,WBGENE00002206,WBGENE00002208,WBGENE00004441,WBGENE00004497,WBGENE00004962,WBGENE00007979,WBGENE00009039,WBGENE00009160,WBGENE00010712,WBGENE00011039,WBGENE00012010,WBGENE00012011,WBGENE00012172,WBGENE00012785,WBGENE00013475,WBGENE00013801,WBGENE00013811,WBGENE00015994,WBGENE00016085,WBGENE00016416,WBGENE00016462,WBGENE00016954,WBGENE000…
GO:CC	peptidase complex	GO:1905368	4.67e-11	10.3307	55	1959	34	11201	WBGENE00003922,WBGENE00003923,WBGENE00003924,WBGENE00003925,WBGENE00003926,WBGENE00003927,WBGENE00003928,WBGENE00003947,WBGENE00003948,WBGENE00003950,WBGENE00003951,WBGENE00003952,WBGENE00003953,WBGENE00004458,WBGENE00004459,WBGENE00004460,WBGENE00004461,WBGENE00004464,WBGENE00004465,WBGENE00004468,WBGENE00004504,WBGENE00004506,WBGENE00006856,WBGENE00008918,WBGENE00011482,WBGENE00011914,WBGENE000…
GO:CC	intrinsic component of organelle membrane	GO:0031300	1.66e-10	9.78089	135	1959	59	11201	WBGENE00000464,WBGENE00001239,WBGENE00001245,WBGENE00001246,WBGENE00001414,WBGENE00001424,WBGENE00005153,WBGENE00006311,WBGENE00006785,WBGENE00007080,WBGENE00007683,WBGENE00007696,WBGENE00007979,WBGENE00008137,WBGENE00008410,WBGENE00008505,WBGENE00008857,WBGENE00008918,WBGENE00009045,WBGENE00009092,WBGENE00009118,WBGENE00009313,WBGENE00009435,WBGENE00009513,WBGENE00009783,WBGENE00010178,WBGENE000…
GO:CC	integral component of organelle membrane	GO:0031301	1.96e-10	9.70819	132	1959	58	11201	WBGENE00000464,WBGENE00001239,WBGENE00001245,WBGENE00001246,WBGENE00001414,WBGENE00001424,WBGENE00005153,WBGENE00006311,WBGENE00006785,WBGENE00007080,WBGENE00007683,WBGENE00007696,WBGENE00007979,WBGENE00008137,WBGENE00008410,WBGENE00008505,WBGENE00008857,WBGENE00008918,WBGENE00009045,WBGENE00009092,WBGENE00009118,WBGENE00009313,WBGENE00009435,WBGENE00009513,WBGENE00009783,WBGENE00010178,WBGENE000…
GO:CC	cytoplasmic side of plasma membrane	GO:0009898	2.38e-10	9.62279	60	1959	35	11201	WBGENE00000184,WBGENE00002193,WBGENE00002198,WBGENE00002204,WBGENE00002206,WBGENE00002208,WBGENE00004962,WBGENE00009039,WBGENE00009160,WBGENE00010712,WBGENE00011039,WBGENE00012010,WBGENE00012011,WBGENE00012172,WBGENE00012785,WBGENE00013475,WBGENE00013801,WBGENE00013811,WBGENE00015994,WBGENE00016085,WBGENE00016416,WBGENE00016462,WBGENE00016954,WBGENE00016961,WBGENE00017736,WBGENE00018999,WBGENE000…
GO:CC	side of membrane	GO:0098552	3.2e-10	9.49525	72	1959	39	11201	WBGENE00000184,WBGENE00002193,WBGENE00002198,WBGENE00002204,WBGENE00002206,WBGENE00002208,WBGENE00004441,WBGENE00004497,WBGENE00004962,WBGENE00007979,WBGENE00009039,WBGENE00009160,WBGENE00010712,WBGENE00011039,WBGENE00012010,WBGENE00012011,WBGENE00012172,WBGENE00012785,WBGENE00013475,WBGENE00013801,WBGENE00013811,WBGENE00015994,WBGENE00016085,WBGENE00016416,WBGENE00016462,WBGENE00016954,WBGENE000…
GO:CC	Golgi apparatus	GO:0005794	7.73e-10	9.11168	299	1959	101	11201	WBGENE00000158,WBGENE00000270,WBGENE00000464,WBGENE00001632,WBGENE00001639,WBGENE00001645,WBGENE00002070,WBGENE00003735,WBGENE00004063,WBGENE00004075,WBGENE00004274,WBGENE00004958,WBGENE00004964,WBGENE00005020,WBGENE00005025,WBGENE00005153,WBGENE00006373,WBGENE00006785,WBGENE00006802,WBGENE00006833,WBGENE00007270,WBGENE00007626,WBGENE00007637,WBGENE00008136,WBGENE00008258,WBGENE00008346,WBGENE000…
GO:CC	proton-transporting two-sector ATPase complex	GO:0016469	2.5e-09	8.60236	39	1959	26	11201	WBGENE00000206,WBGENE00000209,WBGENE00000229,WBGENE00000230,WBGENE00004959,WBGENE00006768,WBGENE00006911,WBGENE00006917,WBGENE00006918,WBGENE00006919,WBGENE00006920,WBGENE00007385,WBGENE00009882,WBGENE00010130,WBGENE00010419,WBGENE00011015,WBGENE00011273,WBGENE00013025,WBGENE00016258,WBGENE00017982,WBGENE00018698,WBGENE00019061,WBGENE00020275,WBGENE00021952,WBGENE00022089,WBGENE00022336
GO:CC	spindle	GO:0005819	5.54e-09	8.25669	65	1959	35	11201	WBGENE00000257,WBGENE00000875,WBGENE00001017,WBGENE00001829,WBGENE00002180,WBGENE00002219,WBGENE00002229,WBGENE00003777,WBGENE00003870,WBGENE00004274,WBGENE00004775,WBGENE00004888,WBGENE00004952,WBGENE00006381,WBGENE00006528,WBGENE00006536,WBGENE00006537,WBGENE00006540,WBGENE00006595,WBGENE00006974,WBGENE00006994,WBGENE00007190,WBGENE00008166,WBGENE00010785,WBGENE00012004,WBGENE00012156,WBGENE000…
GO:CC	intracellular non-membrane-bounded organelle	GO:0043232	1.39e-08	7.85827	1318	1959	317	11201	WBGENE00000123,WBGENE00000226,WBGENE00000228,WBGENE00000248,WBGENE00000257,WBGENE00000293,WBGENE00000500,WBGENE00000777,WBGENE00000875,WBGENE00000938,WBGENE00000962,WBGENE00000982,WBGENE00001005,WBGENE00001007,WBGENE00001017,WBGENE00001018,WBGENE00001093,WBGENE00001333,WBGENE00001488,WBGENE00001491,WBGENE00001829,WBGENE00001830,WBGENE00001831,WBGENE00001855,WBGENE00001860,WBGENE00001862,WBGENE000…
GO:CC	non-membrane-bounded organelle	GO:0043228	1.39e-08	7.85827	1318	1959	317	11201	WBGENE00000123,WBGENE00000226,WBGENE00000228,WBGENE00000248,WBGENE00000257,WBGENE00000293,WBGENE00000500,WBGENE00000777,WBGENE00000875,WBGENE00000938,WBGENE00000962,WBGENE00000982,WBGENE00001005,WBGENE00001007,WBGENE00001017,WBGENE00001018,WBGENE00001093,WBGENE00001333,WBGENE00001488,WBGENE00001491,WBGENE00001829,WBGENE00001830,WBGENE00001831,WBGENE00001855,WBGENE00001860,WBGENE00001862,WBGENE000…
GO:CC	ribosome	GO:0005840	2.78e-08	7.55548	191	1959	70	11201	WBGENE00004408,WBGENE00004409,WBGENE00004410,WBGENE00004412,WBGENE00004414,WBGENE00004415,WBGENE00004416,WBGENE00004418,WBGENE00004419,WBGENE00004420,WBGENE00004422,WBGENE00004424,WBGENE00004425,WBGENE00004426,WBGENE00004428,WBGENE00004430,WBGENE00004431,WBGENE00004433,WBGENE00004439,WBGENE00004441,WBGENE00004442,WBGENE00004444,WBGENE00004445,WBGENE00004446,WBGENE00004447,WBGENE00004448,WBGENE000…
GO:CC	extrinsic component of plasma membrane	GO:0019897	2.93e-08	7.53371	56	1959	31	11201	WBGENE00002193,WBGENE00002198,WBGENE00002204,WBGENE00002206,WBGENE00002208,WBGENE00004962,WBGENE00009039,WBGENE00009160,WBGENE00010712,WBGENE00011039,WBGENE00012010,WBGENE00012011,WBGENE00012172,WBGENE00012785,WBGENE00013475,WBGENE00013801,WBGENE00013811,WBGENE00015994,WBGENE00016085,WBGENE00016416,WBGENE00016462,WBGENE00016954,WBGENE00017736,WBGENE00018999,WBGENE00019081,WBGENE00020003,WBGENE000…
GO:CC	cytoskeleton	GO:0005856	1.73e-07	6.76147	381	1959	114	11201	WBGENE00000228,WBGENE00000248,WBGENE00000257,WBGENE00000293,WBGENE00000777,WBGENE00000875,WBGENE00000962,WBGENE00001005,WBGENE00001007,WBGENE00001017,WBGENE00001018,WBGENE00001093,WBGENE00001333,WBGENE00001488,WBGENE00001491,WBGENE00001829,WBGENE00002036,WBGENE00002180,WBGENE00002201,WBGENE00002214,WBGENE00002215,WBGENE00002219,WBGENE00002229,WBGENE00002694,WBGENE00003777,WBGENE00003870,WBGENE000…
GO:CC	cytosolic small ribosomal subunit	GO:0022627	2.4e-07	6.62027	29	1959	20	11201	WBGENE00004470,WBGENE00004471,WBGENE00004472,WBGENE00004473,WBGENE00004474,WBGENE00004476,WBGENE00004477,WBGENE00004480,WBGENE00004483,WBGENE00004484,WBGENE00004485,WBGENE00004488,WBGENE00004490,WBGENE00004492,WBGENE00004494,WBGENE00004496,WBGENE00004497,WBGENE00004499,WBGENE00006728,WBGENE00012244
GO:CC	proteasome core complex	GO:0005839	2.98e-07	6.52576	14	1959	13	11201	WBGENE00003922,WBGENE00003923,WBGENE00003924,WBGENE00003925,WBGENE00003926,WBGENE00003927,WBGENE00003928,WBGENE00003947,WBGENE00003948,WBGENE00003950,WBGENE00003951,WBGENE00003952,WBGENE00003953
GO:CC	condensed chromosome	GO:0000793	9.43e-07	6.02546	99	1959	42	11201	WBGENE00000226,WBGENE00001017,WBGENE00001829,WBGENE00001830,WBGENE00001860,WBGENE00001862,WBGENE00001867,WBGENE00001869,WBGENE00001996,WBGENE00002219,WBGENE00002229,WBGENE00003576,WBGENE00004737,WBGENE00004738,WBGENE00004775,WBGENE00004874,WBGENE00006376,WBGENE00006377,WBGENE00006381,WBGENE00006994,WBGENE00007028,WBGENE00007278,WBGENE00010056,WBGENE00010198,WBGENE00012156,WBGENE00012191,WBGENE000…
GO:CC	vesicle coat	GO:0030120	2.29e-06	5.63929	24	1959	17	11201	WBGENE00000158,WBGENE00003806,WBGENE00004754,WBGENE00004755,WBGENE00004756,WBGENE00010333,WBGENE00011218,WBGENE00011338,WBGENE00011775,WBGENE00011867,WBGENE00015734,WBGENE00020246,WBGENE00021292,WBGENE00021561,WBGENE00022119,WBGENE00022453,WBGENE00022678
GO:CC	coated vesicle	GO:0030135	3.85e-06	5.41446	62	1959	30	11201	WBGENE00000150,WBGENE00000158,WBGENE00002070,WBGENE00003806,WBGENE00004272,WBGENE00004754,WBGENE00004755,WBGENE00004756,WBGENE00009829,WBGENE00010178,WBGENE00010333,WBGENE00010670,WBGENE00010713,WBGENE00011218,WBGENE00011338,WBGENE00011775,WBGENE00011867,WBGENE00012371,WBGENE00013360,WBGENE00013985,WBGENE00015734,WBGENE00016960,WBGENE00019003,WBGENE00019757,WBGENE00020246,WBGENE00021292,WBGENE000…
GO:CC	intracellular protein-containing complex	GO:0140535	3.86e-06	5.41335	321	1959	96	11201	WBGENE00000123,WBGENE00000144,WBGENE00000369,WBGENE00000376,WBGENE00000419,WBGENE00000836,WBGENE00000837,WBGENE00000838,WBGENE00002196,WBGENE00002344,WBGENE00002583,WBGENE00002845,WBGENE00003922,WBGENE00003923,WBGENE00003924,WBGENE00003925,WBGENE00003926,WBGENE00003927,WBGENE00003928,WBGENE00003947,WBGENE00003948,WBGENE00003950,WBGENE00003951,WBGENE00003952,WBGENE00003953,WBGENE00004320,WBGENE000…
GO:CC	large ribosomal subunit	GO:0015934	3.95e-06	5.40369	82	1959	36	11201	WBGENE00004408,WBGENE00004409,WBGENE00004410,WBGENE00004412,WBGENE00004414,WBGENE00004415,WBGENE00004416,WBGENE00004418,WBGENE00004419,WBGENE00004420,WBGENE00004422,WBGENE00004424,WBGENE00004425,WBGENE00004426,WBGENE00004428,WBGENE00004430,WBGENE00004431,WBGENE00004433,WBGENE00004441,WBGENE00004442,WBGENE00004444,WBGENE00004445,WBGENE00004446,WBGENE00004447,WBGENE00004448,WBGENE00004449,WBGENE000…
GO:CC	extrinsic component of membrane	GO:0019898	8.14e-06	5.08957	77	1959	34	11201	WBGENE00002193,WBGENE00002198,WBGENE00002204,WBGENE00002206,WBGENE00002208,WBGENE00004962,WBGENE00006594,WBGENE00009039,WBGENE00009160,WBGENE00010712,WBGENE00011039,WBGENE00011629,WBGENE00012010,WBGENE00012011,WBGENE00012172,WBGENE00012785,WBGENE00013475,WBGENE00013801,WBGENE00013811,WBGENE00015994,WBGENE00016085,WBGENE00016120,WBGENE00016416,WBGENE00016462,WBGENE00016954,WBGENE00017736,WBGENE000…
GO:CC	kinetochore	GO:0000776	1.14e-05	4.94236	31	1959	19	11201	WBGENE00001017,WBGENE00001829,WBGENE00001830,WBGENE00001869,WBGENE00002219,WBGENE00003576,WBGENE00006381,WBGENE00006994,WBGENE00010198,WBGENE00012156,WBGENE00012191,WBGENE00015515,WBGENE00016387,WBGENE00017643,WBGENE00017832,WBGENE00020064,WBGENE00020392,WBGENE00021460,WBGENE00021648
GO:CC	coated vesicle membrane	GO:0030662	1.36e-05	4.86736	34	1959	20	11201	WBGENE00000158,WBGENE00003806,WBGENE00004754,WBGENE00004755,WBGENE00004756,WBGENE00010333,WBGENE00010713,WBGENE00011218,WBGENE00011338,WBGENE00011775,WBGENE00011867,WBGENE00013985,WBGENE00015734,WBGENE00019757,WBGENE00020246,WBGENE00021292,WBGENE00021561,WBGENE00022119,WBGENE00022453,WBGENE00022678
GO:CC	condensed chromosome, centromeric region	GO:0000779	2.35e-05	4.6289	32	1959	19	11201	WBGENE00001017,WBGENE00001829,WBGENE00001830,WBGENE00001869,WBGENE00002219,WBGENE00003576,WBGENE00006381,WBGENE00006994,WBGENE00010198,WBGENE00012156,WBGENE00012191,WBGENE00015515,WBGENE00016387,WBGENE00017643,WBGENE00017832,WBGENE00020064,WBGENE00020392,WBGENE00021460,WBGENE00021648
GO:CC	membrane coat	GO:0030117	2.65e-05	4.57728	35	1959	20	11201	WBGENE00000150,WBGENE00000158,WBGENE00000160,WBGENE00003806,WBGENE00004754,WBGENE00004755,WBGENE00004756,WBGENE00009542,WBGENE00010333,WBGENE00011218,WBGENE00011338,WBGENE00011775,WBGENE00011867,WBGENE00015734,WBGENE00020246,WBGENE00021292,WBGENE00021561,WBGENE00022119,WBGENE00022453,WBGENE00022678
GO:CC	coated membrane	GO:0048475	2.65e-05	4.57728	35	1959	20	11201	WBGENE00000150,WBGENE00000158,WBGENE00000160,WBGENE00003806,WBGENE00004754,WBGENE00004755,WBGENE00004756,WBGENE00009542,WBGENE00010333,WBGENE00011218,WBGENE00011338,WBGENE00011775,WBGENE00011867,WBGENE00015734,WBGENE00020246,WBGENE00021292,WBGENE00021561,WBGENE00022119,WBGENE00022453,WBGENE00022678
GO:CC	proton-transporting two-sector ATPase complex, catalytic domain	GO:0033178	2.99e-05	4.52436	17	1959	13	11201	WBGENE00000229,WBGENE00000230,WBGENE00004959,WBGENE00006917,WBGENE00006918,WBGENE00006920,WBGENE00010419,WBGENE00013025,WBGENE00017982,WBGENE00018698,WBGENE00019061,WBGENE00021952,WBGENE00022089
GO:CC	chromosome, centromeric region	GO:0000775	4.98e-05	4.30295	36	1959	20	11201	WBGENE00001017,WBGENE00001829,WBGENE00001830,WBGENE00001869,WBGENE00002219,WBGENE00003576,WBGENE00004874,WBGENE00006381,WBGENE00006994,WBGENE00010198,WBGENE00012156,WBGENE00012191,WBGENE00015515,WBGENE00016387,WBGENE00017643,WBGENE00017832,WBGENE00020064,WBGENE00020392,WBGENE00021460,WBGENE00021648
GO:CC	microtubule cytoskeleton	GO:0015630	5.59e-05	4.25295	191	1959	62	11201	WBGENE00000248,WBGENE00000257,WBGENE00000875,WBGENE00000962,WBGENE00001005,WBGENE00001007,WBGENE00001017,WBGENE00001018,WBGENE00001093,WBGENE00001829,WBGENE00002180,WBGENE00002214,WBGENE00002215,WBGENE00002219,WBGENE00002229,WBGENE00003777,WBGENE00003870,WBGENE00004274,WBGENE00004775,WBGENE00004855,WBGENE00004888,WBGENE00004952,WBGENE00004953,WBGENE00004955,WBGENE00006381,WBGENE00006528,WBGENE000…
GO:CC	proton-transporting ATP synthase complex	GO:0045259	9.03e-05	4.04425	18	1959	13	11201	WBGENE00000206,WBGENE00000209,WBGENE00000229,WBGENE00000230,WBGENE00007385,WBGENE00010419,WBGENE00011015,WBGENE00011273,WBGENE00017982,WBGENE00019061,WBGENE00020275,WBGENE00022089,WBGENE00022336
GO:CC	chromosome	GO:0005694	9.16e-05	4.03826	350	1959	98	11201	WBGENE00000123,WBGENE00000226,WBGENE00000938,WBGENE00001017,WBGENE00001829,WBGENE00001830,WBGENE00001831,WBGENE00001855,WBGENE00001860,WBGENE00001862,WBGENE00001867,WBGENE00001869,WBGENE00001911,WBGENE00001944,WBGENE00001973,WBGENE00001996,WBGENE00001999,WBGENE00002219,WBGENE00002229,WBGENE00002344,WBGENE00002717,WBGENE00003025,WBGENE00003367,WBGENE00003576,WBGENE00004046,WBGENE00004053,WBGENE000…
GO:CC	small ribosomal subunit	GO:0015935	9.39e-05	4.02741	56	1959	26	11201	WBGENE00004470,WBGENE00004471,WBGENE00004472,WBGENE00004473,WBGENE00004474,WBGENE00004476,WBGENE00004477,WBGENE00004480,WBGENE00004483,WBGENE00004484,WBGENE00004485,WBGENE00004487,WBGENE00004488,WBGENE00004490,WBGENE00004492,WBGENE00004494,WBGENE00004496,WBGENE00004497,WBGENE00004499,WBGENE00006728,WBGENE00008452,WBGENE00010624,WBGENE00012244,WBGENE00014224,WBGENE00015487,WBGENE00022583
GO:CC	mitochondrial outer membrane	GO:0005741	0.000204	3.69129	24	1959	15	11201	WBGENE00001424,WBGENE00001509,WBGENE00001662,WBGENE00007686,WBGENE00009092,WBGENE00009313,WBGENE00010583,WBGENE00011088,WBGENE00012907,WBGENE00019900,WBGENE00021133,WBGENE00022516,WBGENE00022722,WBGENE00044026,WBGENE00077771
GO:CC	organelle outer membrane	GO:0031968	0.000246	3.60944	27	1959	16	11201	WBGENE00001424,WBGENE00001509,WBGENE00001662,WBGENE00007686,WBGENE00009092,WBGENE00009313,WBGENE00010583,WBGENE00011088,WBGENE00012907,WBGENE00019900,WBGENE00021093,WBGENE00021133,WBGENE00022516,WBGENE00022722,WBGENE00044026,WBGENE00077771
GO:CC	outer membrane	GO:0019867	0.000246	3.60944	27	1959	16	11201	WBGENE00001424,WBGENE00001509,WBGENE00001662,WBGENE00007686,WBGENE00009092,WBGENE00009313,WBGENE00010583,WBGENE00011088,WBGENE00012907,WBGENE00019900,WBGENE00021093,WBGENE00021133,WBGENE00022516,WBGENE00022722,WBGENE00044026,WBGENE00077771
GO:CC	intrinsic component of endoplasmic reticulum membrane	GO:0031227	0.000274	3.56148	62	1959	27	11201	WBGENE00001239,WBGENE00001245,WBGENE00001246,WBGENE00007683,WBGENE00007696,WBGENE00007979,WBGENE00008918,WBGENE00009045,WBGENE00009118,WBGENE00010496,WBGENE00011482,WBGENE00011529,WBGENE00011914,WBGENE00013378,WBGENE00013740,WBGENE00016395,WBGENE00016439,WBGENE00017999,WBGENE00018006,WBGENE00018827,WBGENE00018847,WBGENE00019209,WBGENE00019607,WBGENE00019806,WBGENE00021840,WBGENE00021973,WBGENE000…
GO:CC	chromosomal region	GO:0098687	0.000293	3.53254	52	1959	24	11201	WBGENE00001017,WBGENE00001829,WBGENE00001830,WBGENE00001869,WBGENE00001999,WBGENE00002219,WBGENE00003576,WBGENE00004874,WBGENE00006381,WBGENE00006994,WBGENE00010198,WBGENE00012156,WBGENE00012191,WBGENE00012302,WBGENE00015515,WBGENE00016387,WBGENE00017643,WBGENE00017832,WBGENE00019767,WBGENE00020064,WBGENE00020392,WBGENE00021460,WBGENE00021648,WBGENE00045237
GO:CC	Golgi membrane	GO:0000139	0.000412	3.38504	143	1959	48	11201	WBGENE00000270,WBGENE00000464,WBGENE00001632,WBGENE00001645,WBGENE00002070,WBGENE00004063,WBGENE00004075,WBGENE00004274,WBGENE00005020,WBGENE00005025,WBGENE00005153,WBGENE00006373,WBGENE00006785,WBGENE00006833,WBGENE00007270,WBGENE00007626,WBGENE00008258,WBGENE00008411,WBGENE00008800,WBGENE00009435,WBGENE00009654,WBGENE00009783,WBGENE00010178,WBGENE00010284,WBGENE00010713,WBGENE00011071,WBGENE000…
GO:CC	rough endoplasmic reticulum	GO:0005791	0.000572	3.24297	15	1959	11	11201	WBGENE00001303,WBGENE00004441,WBGENE00004490,WBGENE00004492,WBGENE00004497,WBGENE00007696,WBGENE00009521,WBGENE00011306,WBGENE00013311,WBGENE00014204,WBGENE00021427
GO:CC	Golgi-associated vesicle membrane	GO:0030660	0.000572	3.24297	15	1959	11	11201	WBGENE00000158,WBGENE00007979,WBGENE00010333,WBGENE00011218,WBGENE00011775,WBGENE00011867,WBGENE00015734,WBGENE00020246,WBGENE00021292,WBGENE00021561,WBGENE00022119
GO:CC	integral component of endoplasmic reticulum membrane	GO:0030176	0.000698	3.15639	61	1959	26	11201	WBGENE00001239,WBGENE00001245,WBGENE00001246,WBGENE00007683,WBGENE00007696,WBGENE00007979,WBGENE00008918,WBGENE00009045,WBGENE00009118,WBGENE00010496,WBGENE00011482,WBGENE00011529,WBGENE00011914,WBGENE00013378,WBGENE00013740,WBGENE00016395,WBGENE00016439,WBGENE00017999,WBGENE00018006,WBGENE00018827,WBGENE00018847,WBGENE00019209,WBGENE00019607,WBGENE00021840,WBGENE00021973,WBGENE00022776
GO:CC	COPII-coated ER to Golgi transport vesicle	GO:0030134	0.000898	3.04677	29	1959	16	11201	WBGENE00002070,WBGENE00003806,WBGENE00004754,WBGENE00004755,WBGENE00004756,WBGENE00009829,WBGENE00010178,WBGENE00010670,WBGENE00010713,WBGENE00011338,WBGENE00012371,WBGENE00013360,WBGENE00013985,WBGENE00019003,WBGENE00019757,WBGENE00022678
GO:CC	proteasome core complex, alpha-subunit complex	GO:0019773	0.000909	3.0416	7	1959	7	11201	WBGENE00003922,WBGENE00003923,WBGENE00003924,WBGENE00003925,WBGENE00003926,WBGENE00003927,WBGENE00003928
GO:CC	Golgi-associated vesicle	GO:0005798	0.00095	3.02219	18	1959	12	11201	WBGENE00000158,WBGENE00004272,WBGENE00007979,WBGENE00010333,WBGENE00011218,WBGENE00011775,WBGENE00011867,WBGENE00015734,WBGENE00020246,WBGENE00021292,WBGENE00021561,WBGENE00022119
GO:CC	proteasome regulatory particle	GO:0005838	0.00108	2.96643	11	1959	9	11201	WBGENE00004458,WBGENE00004461,WBGENE00004464,WBGENE00004465,WBGENE00004468,WBGENE00004504,WBGENE00004506,WBGENE00015688,WBGENE00018135
GO:CC	transmembrane transporter complex	GO:1902495	0.001266	2.89746	100	1959	36	11201	WBGENE00000869,WBGENE00002162,WBGENE00003061,WBGENE00003403,WBGENE00003831,WBGENE00004976,WBGENE00006463,WBGENE00007880,WBGENE00008074,WBGENE00008185,WBGENE00008186,WBGENE00008414,WBGENE00009051,WBGENE00009294,WBGENE00009712,WBGENE00009739,WBGENE00009992,WBGENE00010326,WBGENE00012166,WBGENE00013237,WBGENE00013308,WBGENE00013406,WBGENE00014086,WBGENE00015755,WBGENE00015810,WBGENE00016118,WBGENE000…
GO:CC	proton-transporting V-type ATPase complex	GO:0033176	0.002168	2.66402	19	1959	12	11201	WBGENE00004959,WBGENE00006768,WBGENE00006911,WBGENE00006918,WBGENE00006919,WBGENE00006920,WBGENE00009882,WBGENE00010130,WBGENE00013025,WBGENE00016258,WBGENE00018698,WBGENE00021952
GO:CC	mitochondrial proton-transporting ATP synthase complex	GO:0005753	0.002422	2.61591	14	1959	10	11201	WBGENE00000206,WBGENE00000209,WBGENE00000230,WBGENE00007385,WBGENE00011015,WBGENE00011273,WBGENE00017982,WBGENE00019061,WBGENE00020275,WBGENE00022336
GO:CC	transporter complex	GO:1990351	0.00271	2.56698	103	1959	36	11201	WBGENE00000869,WBGENE00002162,WBGENE00003061,WBGENE00003403,WBGENE00003831,WBGENE00004976,WBGENE00006463,WBGENE00007880,WBGENE00008074,WBGENE00008185,WBGENE00008186,WBGENE00008414,WBGENE00009051,WBGENE00009294,WBGENE00009712,WBGENE00009739,WBGENE00009992,WBGENE00010326,WBGENE00012166,WBGENE00013237,WBGENE00013308,WBGENE00013406,WBGENE00014086,WBGENE00015755,WBGENE00015810,WBGENE00016118,WBGENE000…
GO:CC	proteasome accessory complex	GO:0022624	0.003646	2.43815	12	1959	9	11201	WBGENE00004458,WBGENE00004461,WBGENE00004464,WBGENE00004465,WBGENE00004468,WBGENE00004504,WBGENE00004506,WBGENE00015688,WBGENE00018135
GO:CC	supramolecular complex	GO:0099080	0.004763	2.32216	334	1959	88	11201	WBGENE00000228,WBGENE00000248,WBGENE00000257,WBGENE00000500,WBGENE00000962,WBGENE00001007,WBGENE00001017,WBGENE00001093,WBGENE00001333,WBGENE00001829,WBGENE00001830,WBGENE00001869,WBGENE00002059,WBGENE00002214,WBGENE00002219,WBGENE00002229,WBGENE00002694,WBGENE00002845,WBGENE00003403,WBGENE00003508,WBGENE00003576,WBGENE00003777,WBGENE00003870,WBGENE00003902,WBGENE00003917,WBGENE00003992,WBGENE000…
GO:CC	rough endoplasmic reticulum membrane	GO:0030867	0.005094	2.29293	10	1959	8	11201	WBGENE00001303,WBGENE00004441,WBGENE00004497,WBGENE00009521,WBGENE00011306,WBGENE00013311,WBGENE00014204,WBGENE00021427
GO:CC	COPII vesicle coat	GO:0030127	0.005209	2.28327	6	1959	6	11201	WBGENE00003806,WBGENE00004754,WBGENE00004755,WBGENE00004756,WBGENE00011338,WBGENE00022678
GO:CC	cell cortex	GO:0005938	0.008005	2.09662	76	1959	28	11201	WBGENE00000228,WBGENE00001017,WBGENE00001333,WBGENE00002201,WBGENE00002297,WBGENE00003777,WBGENE00003917,WBGENE00004075,WBGENE00004272,WBGENE00004357,WBGENE00004753,WBGENE00004775,WBGENE00004955,WBGENE00004958,WBGENE00006795,WBGENE00006957,WBGENE00008166,WBGENE00010685,WBGENE00011040,WBGENE00012004,WBGENE00012156,WBGENE00013121,WBGENE00013132,WBGENE00016800,WBGENE00017284,WBGENE00019600,WBGENE000…
GO:CC	proton-transporting two-sector ATPase complex, proton-transporting domain	GO:0033177	0.008938	2.04876	21	1959	12	11201	WBGENE00000206,WBGENE00000209,WBGENE00000230,WBGENE00006768,WBGENE00006911,WBGENE00007385,WBGENE00009882,WBGENE00011015,WBGENE00011273,WBGENE00016258,WBGENE00020275,WBGENE00022336
GO:CC	cytochrome complex	GO:0070069	0.01376	1.86138	16	1959	10	11201	WBGENE00000869,WBGENE00002162,WBGENE00006519,WBGENE00009161,WBGENE00009739,WBGENE00012354,WBGENE00012553,WBGENE00015755,WBGENE00019007,WBGENE00020181
GO:CC	eukaryotic translation initiation factor 3 complex	GO:0005852	0.01376	1.86138	16	1959	10	11201	WBGENE00001209,WBGENE00001225,WBGENE00001227,WBGENE00001228,WBGENE00001229,WBGENE00001230,WBGENE00001232,WBGENE00001233,WBGENE00015920,WBGENE00019543
GO:CC	proton-transporting ATP synthase complex, coupling factor F(o)	GO:0045263	0.015797	1.80142	11	1959	8	11201	WBGENE00000206,WBGENE00000209,WBGENE00000230,WBGENE00007385,WBGENE00011015,WBGENE00011273,WBGENE00020275,WBGENE00022336
GO:CC	centrosome	GO:0005813	0.023204	1.63443	46	1959	19	11201	WBGENE00001007,WBGENE00001017,WBGENE00002180,WBGENE00002219,WBGENE00004775,WBGENE00004953,WBGENE00004955,WBGENE00006381,WBGENE00006540,WBGENE00006595,WBGENE00006974,WBGENE00006994,WBGENE00012004,WBGENE00012156,WBGENE00018869,WBGENE00019600,WBGENE00020461,WBGENE00021461,WBGENE00021470
GO:CC	Golgi apparatus subcompartment	GO:0098791	0.023372	1.63131	57	1959	22	11201	WBGENE00001639,WBGENE00001645,WBGENE00004274,WBGENE00006802,WBGENE00006833,WBGENE00007270,WBGENE00008346,WBGENE00009336,WBGENE00009498,WBGENE00010040,WBGENE00010699,WBGENE00010713,WBGENE00011827,WBGENE00011975,WBGENE00012208,WBGENE00013034,WBGENE00013551,WBGENE00018017,WBGENE00020193,WBGENE00021561,WBGENE00021644,WBGENE00043064
GO:CC	mitochondrial proton-transporting ATP synthase complex, coupling factor F(o)	GO:0000276	0.023503	1.62888	9	1959	7	11201	WBGENE00000206,WBGENE00000209,WBGENE00000230,WBGENE00007385,WBGENE00011015,WBGENE00020275,WBGENE00022336
GO:CC	perinuclear region of cytoplasm	GO:0048471	0.028829	1.54018	77	1959	27	11201	WBGENE00001639,WBGENE00003499,WBGENE00003508,WBGENE00003784,WBGENE00003870,WBGENE00004373,WBGENE00004681,WBGENE00004958,WBGENE00004965,WBGENE00005153,WBGENE00006802,WBGENE00006808,WBGENE00006833,WBGENE00009594,WBGENE00010280,WBGENE00012004,WBGENE00012930,WBGENE00014208,WBGENE00016449,WBGENE00017733,WBGENE00018586,WBGENE00019629,WBGENE00019822,WBGENE00021270,WBGENE00022019,WBGENE00022034,WBGENE000…
GO:CC	nucleus	GO:0005634	0.029359	1.53226	2382	1959	477	11201	WBGENE00000097,WBGENE00000121,WBGENE00000122,WBGENE00000123,WBGENE00000144,WBGENE00000226,WBGENE00000257,WBGENE00000376,WBGENE00000389,WBGENE00000467,WBGENE00000472,WBGENE00000475,WBGENE00000517,WBGENE00000912,WBGENE00000938,WBGENE00001016,WBGENE00001017,WBGENE00001092,WBGENE00001194,WBGENE00001249,WBGENE00001259,WBGENE00001439,WBGENE00001829,WBGENE00001860,WBGENE00001862,WBGENE00001867,WBGENE000…
GO:CC	oligosaccharyltransferase complex	GO:0008250	0.029845	1.52513	5	1959	5	11201	WBGENE00000896,WBGENE00019693,WBGENE00020683,WBGENE00021960,WBGENE00022793
GO:CC	intrinsic component of Golgi membrane	GO:0031228	0.033172	1.47923	33	1959	15	11201	WBGENE00000464,WBGENE00005153,WBGENE00006785,WBGENE00009435,WBGENE00009783,WBGENE00010178,WBGENE00012371,WBGENE00013740,WBGENE00014139,WBGENE00015038,WBGENE00015404,WBGENE00016400,WBGENE00018827,WBGENE00020193,WBGENE00043064
GO:CC	integral component of Golgi membrane	GO:0030173	0.033172	1.47923	33	1959	15	11201	WBGENE00000464,WBGENE00005153,WBGENE00006785,WBGENE00009435,WBGENE00009783,WBGENE00010178,WBGENE00012371,WBGENE00013740,WBGENE00014139,WBGENE00015038,WBGENE00015404,WBGENE00016400,WBGENE00018827,WBGENE00020193,WBGENE00043064
GO:CC	vesicle membrane	GO:0012506	0.037275	1.42858	167	1959	48	11201	WBGENE00000101,WBGENE00000158,WBGENE00000184,WBGENE00003806,WBGENE00004101,WBGENE00004271,WBGENE00004272,WBGENE00004274,WBGENE00004373,WBGENE00004754,WBGENE00004755,WBGENE00004756,WBGENE00006594,WBGENE00007390,WBGENE00007979,WBGENE00008498,WBGENE00008919,WBGENE00009098,WBGENE00010333,WBGENE00010713,WBGENE00010755,WBGENE00011218,WBGENE00011338,WBGENE00011775,WBGENE00011867,WBGENE00011972,WBGENE000…
GO:CC	cytoplasmic vesicle membrane	GO:0030659	0.037275	1.42858	167	1959	48	11201	WBGENE00000101,WBGENE00000158,WBGENE00000184,WBGENE00003806,WBGENE00004101,WBGENE00004271,WBGENE00004272,WBGENE00004274,WBGENE00004373,WBGENE00004754,WBGENE00004755,WBGENE00004756,WBGENE00006594,WBGENE00007390,WBGENE00007979,WBGENE00008498,WBGENE00008919,WBGENE00009098,WBGENE00010333,WBGENE00010713,WBGENE00010755,WBGENE00011218,WBGENE00011338,WBGENE00011775,WBGENE00011867,WBGENE00011972,WBGENE000…
GO:CC	integral component of mitochondrial membrane	GO:0032592	0.041602	1.38089	37	1959	16	11201	WBGENE00001424,WBGENE00007080,WBGENE00008137,WBGENE00008410,WBGENE00008505,WBGENE00008857,WBGENE00009092,WBGENE00009313,WBGENE00009513,WBGENE00011493,WBGENE00012402,WBGENE00015208,WBGENE00016358,WBGENE00018046,WBGENE00018784,WBGENE00021024
GO:CC	spindle pole	GO:0000922	0.044002	1.35653	27	1959	13	11201	WBGENE00000257,WBGENE00001017,WBGENE00002219,WBGENE00003870,WBGENE00006381,WBGENE00006595,WBGENE00006994,WBGENE00007190,WBGENE00008166,WBGENE00015515,WBGENE00015855,WBGENE00020070,WBGENE00021470
GO:CC	ER to Golgi transport vesicle membrane	GO:0012507	0.049938	1.30157	15	1959	9	11201	WBGENE00003806,WBGENE00004754,WBGENE00004755,WBGENE00004756,WBGENE00010713,WBGENE00011338,WBGENE00013985,WBGENE00019757,WBGENE00022678
KEGG	Oxidative phosphorylation	KEGG:00190	2.15e-24	23.667	95	730	68	3369	WBGENE00000206,WBGENE00000209,WBGENE00000229,WBGENE00000230,WBGENE00000869,WBGENE00002162,WBGENE00003061,WBGENE00003225,WBGENE00003831,WBGENE00004959,WBGENE00006433,WBGENE00006463,WBGENE00006519,WBGENE00006768,WBGENE00006911,WBGENE00006917,WBGENE00006918,WBGENE00006919,WBGENE00006920,WBGENE00007548,WBGENE00007880,WBGENE00008149,WBGENE00008414,WBGENE00009051,WBGENE00009161,WBGENE00009294,WBGENE000…
KEGG	Protein processing in endoplasmic reticulum	KEGG:04141	2.85e-21	20.545	130	730	79	3369	WBGENE00000236,WBGENE00000500,WBGENE00000567,WBGENE00000802,WBGENE00000836,WBGENE00000843,WBGENE00000896,WBGENE00000915,WBGENE00001019,WBGENE00001030,WBGENE00001037,WBGENE00001038,WBGENE00001046,WBGENE00001047,WBGENE00001303,WBGENE00001334,WBGENE00002005,WBGENE00002007,WBGENE00002008,WBGENE00002147,WBGENE00002344,WBGENE00003806,WBGENE00003962,WBGENE00003964,WBGENE00004320,WBGENE00004381,WBGENE000…
KEGG	Metabolic pathways	KEGG:01100	7.76e-15	14.1101	900	730	284	3369	WBGENE00000041,WBGENE00000112,WBGENE00000114,WBGENE00000115,WBGENE00000117,WBGENE00000198,WBGENE00000206,WBGENE00000209,WBGENE00000229,WBGENE00000230,WBGENE00000266,WBGENE00000269,WBGENE00000392,WBGENE00000536,WBGENE00000833,WBGENE00000869,WBGENE00000896,WBGENE00000913,WBGENE00000976,WBGENE00000982,WBGENE00001155,WBGENE00001239,WBGENE00001241,WBGENE00001242,WBGENE00001503,WBGENE00001505,WBGENE000…
KEGG	Proteasome	KEGG:03050	2.24e-12	11.6504	40	730	31	3369	WBGENE00003922,WBGENE00003924,WBGENE00003925,WBGENE00003926,WBGENE00003927,WBGENE00003928,WBGENE00003947,WBGENE00003948,WBGENE00003950,WBGENE00003951,WBGENE00003952,WBGENE00003953,WBGENE00004458,WBGENE00004459,WBGENE00004460,WBGENE00004461,WBGENE00004463,WBGENE00004464,WBGENE00004465,WBGENE00004466,WBGENE00004468,WBGENE00004501,WBGENE00004502,WBGENE00004503,WBGENE00004504,WBGENE00004505,WBGENE000…
KEGG	Ribosome	KEGG:03010	4.49e-10	9.34753	126	730	61	3369	WBGENE00004408,WBGENE00004409,WBGENE00004410,WBGENE00004412,WBGENE00004414,WBGENE00004415,WBGENE00004416,WBGENE00004418,WBGENE00004419,WBGENE00004420,WBGENE00004422,WBGENE00004424,WBGENE00004425,WBGENE00004426,WBGENE00004428,WBGENE00004431,WBGENE00004433,WBGENE00004439,WBGENE00004442,WBGENE00004444,WBGENE00004445,WBGENE00004446,WBGENE00004447,WBGENE00004448,WBGENE00004449,WBGENE00004450,WBGENE000…
KEGG	Carbon metabolism	KEGG:01200	1.89e-06	5.72425	104	730	47	3369	WBGENE00000041,WBGENE00000114,WBGENE00000833,WBGENE00001155,WBGENE00001503,WBGENE00001683,WBGENE00001686,WBGENE00002183,WBGENE00003162,WBGENE00003214,WBGENE00003225,WBGENE00006433,WBGENE00006601,WBGENE00007108,WBGENE00007824,WBGENE00007969,WBGENE00008230,WBGENE00008506,WBGENE00008780,WBGENE00009082,WBGENE00009126,WBGENE00009353,WBGENE00009440,WBGENE00009664,WBGENE00009918,WBGENE00010317,WBGENE000…
KEGG	Citrate cycle (TCA cycle)	KEGG:00020	3.94e-06	5.40414	32	730	21	3369	WBGENE00000041,WBGENE00000833,WBGENE00001503,WBGENE00003162,WBGENE00003225,WBGENE00006433,WBGENE00007824,WBGENE00009082,WBGENE00009353,WBGENE00009440,WBGENE00009664,WBGENE00010317,WBGENE00010794,WBGENE00011232,WBGENE00011510,WBGENE00016392,WBGENE00016844,WBGENE00017759,WBGENE00018491,WBGENE00020679,WBGENE00020950
KEGG	Phagosome	KEGG:04145	2.6e-05	4.58527	62	730	31	3369	WBGENE00000063,WBGENE00000064,WBGENE00000065,WBGENE00000248,WBGENE00000567,WBGENE00000802,WBGENE00000962,WBGENE00001007,WBGENE00001303,WBGENE00004101,WBGENE00004271,WBGENE00004959,WBGENE00006528,WBGENE00006536,WBGENE00006537,WBGENE00006768,WBGENE00006911,WBGENE00006917,WBGENE00006918,WBGENE00006919,WBGENE00006920,WBGENE00009882,WBGENE00010130,WBGENE00013025,WBGENE00013311,WBGENE00015927,WBGENE000…
KEGG	Protein export	KEGG:03060	5.65e-05	4.24821	21	730	15	3369	WBGENE00001047,WBGENE00001303,WBGENE00002007,WBGENE00002008,WBGENE00007683,WBGENE00009012,WBGENE00009521,WBGENE00010097,WBGENE00011306,WBGENE00012550,WBGENE00013311,WBGENE00016395,WBGENE00017799,WBGENE00021427,WBGENE00021844
KEGG	N-Glycan biosynthesis	KEGG:00510	0.000228	3.64128	38	730	21	3369	WBGENE00000269,WBGENE00000896,WBGENE00001639,WBGENE00001645,WBGENE00007043,WBGENE00007102,WBGENE00008258,WBGENE00008411,WBGENE00009219,WBGENE00009583,WBGENE00010284,WBGENE00011638,WBGENE00013362,WBGENE00013881,WBGENE00015162,WBGENE00019276,WBGENE00019693,WBGENE00019725,WBGENE00020437,WBGENE00020683,WBGENE00022793
KEGG	mRNA surveillance pathway	KEGG:03015	0.001204	2.91927	75	730	32	3369	WBGENE00000121,WBGENE00000122,WBGENE00001747,WBGENE00001840,WBGENE00002363,WBGENE00003123,WBGENE00003901,WBGENE00003902,WBGENE00004388,WBGENE00004706,WBGENE00004879,WBGENE00006307,WBGENE00006352,WBGENE00007554,WBGENE00007625,WBGENE00007710,WBGENE00010405,WBGENE00011808,WBGENE00012348,WBGENE00012528,WBGENE00015329,WBGENE00015661,WBGENE00016374,WBGENE00016398,WBGENE00016601,WBGENE00017988,WBGENE000…
KEGG	Valine, leucine and isoleucine degradation	KEGG:00280	0.001787	2.74785	51	730	24	3369	WBGENE00000114,WBGENE00000115,WBGENE00000117,WBGENE00001155,WBGENE00002183,WBGENE00006518,WBGENE00007330,WBGENE00009319,WBGENE00009952,WBGENE00010035,WBGENE00010794,WBGENE00012713,WBGENE00012855,WBGENE00014054,WBGENE00015125,WBGENE00015326,WBGENE00016943,WBGENE00017301,WBGENE00019406,WBGENE00019433,WBGENE00019978,WBGENE00020347,WBGENE00020382,WBGENE00020419
KEGG	Various types of N-glycan biosynthesis	KEGG:00513	0.005897	2.22938	33	730	17	3369	WBGENE00000269,WBGENE00000896,WBGENE00001505,WBGENE00001639,WBGENE00001645,WBGENE00008258,WBGENE00008411,WBGENE00010284,WBGENE00011638,WBGENE00013881,WBGENE00015162,WBGENE00019693,WBGENE00019725,WBGENE00020437,WBGENE00020683,WBGENE00021766,WBGENE00022793
KEGG	Ubiquitin mediated proteolysis	KEGG:04120	0.007589	2.11982	88	730	34	3369	WBGENE00000144,WBGENE00000500,WBGENE00000836,WBGENE00000837,WBGENE00000838,WBGENE00001574,WBGENE00002344,WBGENE00003009,WBGENE00003132,WBGENE00004320,WBGENE00004341,WBGENE00004767,WBGENE00004768,WBGENE00004807,WBGENE00004808,WBGENE00006699,WBGENE00006701,WBGENE00006702,WBGENE00006703,WBGENE00006704,WBGENE00006707,WBGENE00006713,WBGENE00006715,WBGENE00006719,WBGENE00006720,WBGENE00006727,WBGENE000…
KEGG	Spliceosome	KEGG:03040	0.012234	1.91242	111	730	40	3369	WBGENE00000121,WBGENE00000122,WBGENE00001840,WBGENE00001999,WBGENE00002005,WBGENE00003123,WBGENE00003389,WBGENE00004187,WBGENE00004698,WBGENE00004699,WBGENE00004700,WBGENE00004701,WBGENE00004703,WBGENE00004705,WBGENE00004723,WBGENE00004891,WBGENE00004916,WBGENE00004918,WBGENE00006697,WBGENE00006698,WBGENE00007400,WBGENE00008683,WBGENE00009966,WBGENE00010629,WBGENE00011605,WBGENE00011687,WBGENE000…
KEGG	Glycolysis / Gluconeogenesis	KEGG:00010	0.021041	1.67693	42	730	19	3369	WBGENE00000115,WBGENE00000117,WBGENE00001683,WBGENE00001686,WBGENE00006601,WBGENE00007824,WBGENE00007969,WBGENE00008230,WBGENE00008780,WBGENE00009082,WBGENE00009126,WBGENE00010794,WBGENE00011232,WBGENE00011510,WBGENE00011884,WBGENE00012803,WBGENE00017166,WBGENE00019001,WBGENE00020185
KEGG	Fatty acid elongation	KEGG:00062	0.021093	1.67585	27	730	14	3369	WBGENE00000198,WBGENE00001155,WBGENE00001239,WBGENE00001241,WBGENE00001242,WBGENE00002891,WBGENE00007363,WBGENE00009952,WBGENE00010035,WBGENE00012375,WBGENE00015125,WBGENE00019978,WBGENE00020347,WBGENE00020517
KEGG	Biosynthesis of amino acids	KEGG:01230	0.027345	1.56313	69	730	27	3369	WBGENE00000041,WBGENE00000833,WBGENE00001603,WBGENE00001683,WBGENE00001686,WBGENE00003214,WBGENE00006416,WBGENE00006601,WBGENE00008230,WBGENE00008506,WBGENE00009126,WBGENE00009440,WBGENE00009664,WBGENE00010317,WBGENE00011884,WBGENE00012855,WBGENE00015538,WBGENE00015540,WBGENE00016333,WBGENE00017166,WBGENE00018783,WBGENE00019001,WBGENE00019096,WBGENE00020107,WBGENE00020185,WBGENE00021787,WBGENE000…
KEGG	Pyruvate metabolism	KEGG:00620	0.034405	1.46338	31	730	15	3369	WBGENE00000115,WBGENE00000117,WBGENE00001503,WBGENE00002183,WBGENE00003162,WBGENE00004076,WBGENE00007824,WBGENE00007969,WBGENE00009082,WBGENE00009126,WBGENE00010794,WBGENE00011232,WBGENE00011510,WBGENE00012983,WBGENE00018491
WP	Cell division: first embryonic mitosis	WP:WP1411	1.18e-10	9.92658	117	350	72	1077	WBGENE00000099,WBGENE00000248,WBGENE00000249,WBGENE00000275,WBGENE00000293,WBGENE00000549,WBGENE00000804,WBGENE00000838,WBGENE00000875,WBGENE00000962,WBGENE00001005,WBGENE00001007,WBGENE00001017,WBGENE00001018,WBGENE00001829,WBGENE00001830,WBGENE00001831,WBGENE00001860,WBGENE00001869,WBGENE00002219,WBGENE00002229,WBGENE00002231,WBGENE00002297,WBGENE00002363,WBGENE00002694,WBGENE00002879,WBGENE000…
WP	Proteasome degradation	WP:WP470	3.72e-09	8.42948	36	350	30	1077	WBGENE00002344,WBGENE00003922,WBGENE00003923,WBGENE00003924,WBGENE00003925,WBGENE00003926,WBGENE00003927,WBGENE00003928,WBGENE00003947,WBGENE00003950,WBGENE00003951,WBGENE00003952,WBGENE00004458,WBGENE00004460,WBGENE00004461,WBGENE00004463,WBGENE00004464,WBGENE00004465,WBGENE00004466,WBGENE00004468,WBGENE00004501,WBGENE00004502,WBGENE00004503,WBGENE00004504,WBGENE00004505,WBGENE00004506,WBGENE000…
WP	Cytoplasmic ribosomal proteins	WP:WP540	1.84e-07	6.73628	61	350	41	1077	WBGENE00004408,WBGENE00004409,WBGENE00004412,WBGENE00004414,WBGENE00004415,WBGENE00004416,WBGENE00004419,WBGENE00004420,WBGENE00004422,WBGENE00004425,WBGENE00004426,WBGENE00004428,WBGENE00004430,WBGENE00004441,WBGENE00004444,WBGENE00004445,WBGENE00004446,WBGENE00004447,WBGENE00004448,WBGENE00004449,WBGENE00004452,WBGENE00004456,WBGENE00004470,WBGENE00004471,WBGENE00004472,WBGENE00004473,WBGENE000…
WP	Translation factors	WP:WP110	6.63e-05	4.17822	30	350	22	1077	WBGENE00001160,WBGENE00001167,WBGENE00001168,WBGENE00001209,WBGENE00001225,WBGENE00001227,WBGENE00001228,WBGENE00001229,WBGENE00001230,WBGENE00001232,WBGENE00002061,WBGENE00002064,WBGENE00002083,WBGENE00003902,WBGENE00008670,WBGENE00010560,WBGENE00012768,WBGENE00016496,WBGENE00018846,WBGENE00019162,WBGENE00020269,WBGENE00021351
WP	Mitochondrial unfolded-protein response	WP:WP525	0.002028	2.693	256	350	108	1077	WBGENE00000770,WBGENE00000771,WBGENE00001028,WBGENE00001094,WBGENE00001167,WBGENE00001168,WBGENE00001209,WBGENE00001225,WBGENE00001227,WBGENE00001228,WBGENE00001229,WBGENE00001230,WBGENE00001232,WBGENE00001233,WBGENE00001747,WBGENE00002010,WBGENE00002059,WBGENE00002061,WBGENE00002063,WBGENE00002064,WBGENE00002083,WBGENE00002238,WBGENE00003815,WBGENE00004409,WBGENE00004412,WBGENE00004414,WBGENE000…
TF	Factor: ceh-48; motif: NNYCRATAN; match class: 1	TF:M08052_1	4.9e-27	26.3098	5887	3025	1208	18840	WBGENE00000063,WBGENE00000064,WBGENE00000065,WBGENE00000097,WBGENE00000102,WBGENE00000112,WBGENE00000123,WBGENE00000151,WBGENE00000158,WBGENE00000171,WBGENE00000182,WBGENE00000184,WBGENE00000206,WBGENE00000230,WBGENE00000231,WBGENE00000248,WBGENE00000249,WBGENE00000254,WBGENE00000263,WBGENE00000269,WBGENE00000270,WBGENE00000376,WBGENE00000390,WBGENE00000407,WBGENE00000410,WBGENE00000418,WBGENE000…
TF	Factor: ceh-48; motif: NNYCRATAN	TF:M08052	5.21e-18	17.2828	12308	3025	2189	18840	WBGENE00000007,WBGENE00000019,WBGENE00000023,WBGENE00000063,WBGENE00000064,WBGENE00000065,WBGENE00000097,WBGENE00000101,WBGENE00000102,WBGENE00000112,WBGENE00000115,WBGENE00000117,WBGENE00000123,WBGENE00000144,WBGENE00000150,WBGENE00000151,WBGENE00000155,WBGENE00000158,WBGENE00000160,WBGENE00000169,WBGENE00000171,WBGENE00000182,WBGENE00000183,WBGENE00000184,WBGENE00000187,WBGENE00000198,WBGENE000…
WBGENE00302984	WBGENE00303000	WBGENE00303007	WBGENE00303208	WBGENE00303233"
TF	Factor: hlh-30; motif: NRTCACGTGAYN; match class: 1	TF:M12393_1	6.57e-14	13.1827	376	3025	122	18840	WBGENE00000115,WBGENE00000263,WBGENE00000837,WBGENE00000865,WBGENE00001194,WBGENE00001414,WBGENE00001571,WBGENE00002066,WBGENE00003901,WBGENE00004205,WBGENE00004430,WBGENE00004497,WBGENE00004855,WBGENE00004952,WBGENE00004962,WBGENE00004966,WBGENE00006594,WBGENE00006625,WBGENE00006697,WBGENE00006734,WBGENE00007169,WBGENE00007337,WBGENE00007385,WBGENE00007386,WBGENE00007390,WBGENE00007554,WBGENE000…
TF	Factor: hlh-30; motif: NRTCACGTGAYN	TF:M12393	6.57e-14	13.1827	376	3025	122	18840	WBGENE00000115,WBGENE00000263,WBGENE00000837,WBGENE00000865,WBGENE00001194,WBGENE00001414,WBGENE00001571,WBGENE00002066,WBGENE00003901,WBGENE00004205,WBGENE00004430,WBGENE00004497,WBGENE00004855,WBGENE00004952,WBGENE00004962,WBGENE00004966,WBGENE00006594,WBGENE00006625,WBGENE00006697,WBGENE00006734,WBGENE00007169,WBGENE00007337,WBGENE00007385,WBGENE00007386,WBGENE00007390,WBGENE00007554,WBGENE000…
TF	Factor: hlh-30; motif: NNNATCACGTGAYNNNN	TF:M03123	2.91e-07	6.53668	240	3025	74	18840	WBGENE00000115,WBGENE00000263,WBGENE00000837,WBGENE00000865,WBGENE00001194,WBGENE00001414,WBGENE00003901,WBGENE00004205,WBGENE00004497,WBGENE00004952,WBGENE00004962,WBGENE00004966,WBGENE00006594,WBGENE00006625,WBGENE00006734,WBGENE00007169,WBGENE00007337,WBGENE00007385,WBGENE00007386,WBGENE00007390,WBGENE00007579,WBGENE00007735,WBGENE00008224,WBGENE00008530,WBGENE00008581,WBGENE00009012,WBGENE000…
TF	Factor: cebp-1; motif: ATTTCGTAATAN	TF:M12389	1.34e-06	5.87415	3180	3025	615	18840	WBGENE00000063,WBGENE00000064,WBGENE00000065,WBGENE00000117,WBGENE00000121,WBGENE00000123,WBGENE00000160,WBGENE00000171,WBGENE00000182,WBGENE00000209,WBGENE00000248,WBGENE00000249,WBGENE00000263,WBGENE00000266,WBGENE00000268,WBGENE00000275,WBGENE00000390,WBGENE00000392,WBGENE00000405,WBGENE00000407,WBGENE00000410,WBGENE00000464,WBGENE00000475,WBGENE00000500,WBGENE00000507,WBGENE00000508,WBGENE000…
TF	Factor: ceh-28; motif: WWATCGATWW	TF:M12390	1.45e-05	4.83963	474	3025	118	18840	WBGENE00000158,WBGENE00000184,WBGENE00000269,WBGENE00000500,WBGENE00000838,WBGENE00001017,WBGENE00001030,WBGENE00001160,WBGENE00001334,WBGENE00001414,WBGENE00001579,WBGENE00001869,WBGENE00002250,WBGENE00003587,WBGENE00003589,WBGENE00004014,WBGENE00004086,WBGENE00004414,WBGENE00004433,WBGENE00004466,WBGENE00004702,WBGENE00004916,WBGENE00004963,WBGENE00004971,WBGENE00005012,WBGENE00006381,WBGENE000…
TF	Factor: cebp-1; motif: ATTTCGTAATAN; match class: 1	TF:M12389_1	0.000134	3.87139	644	3025	147	18840	WBGENE00000063,WBGENE00000064,WBGENE00000160,WBGENE00000171,WBGENE00000275,WBGENE00000390,WBGENE00000410,WBGENE00000475,WBGENE00000507,WBGENE00000508,WBGENE00000552,WBGENE00000915,WBGENE00000962,WBGENE00001194,WBGENE00001259,WBGENE00001414,WBGENE00001443,WBGENE00002005,WBGENE00002066,WBGENE00002083,WBGENE00002263,WBGENE00003041,WBGENE00003052,WBGENE00003389,WBGENE00003793,WBGENE00003805,WBGENE000…
TF	Factor: hlh-30; motif: NNNATCACGTGAYNNNN; match class: 1	TF:M03123_1	0.000278	3.55611	160	3025	48	18840	WBGENE00000115,WBGENE00000837,WBGENE00003901,WBGENE00004205,WBGENE00004952,WBGENE00004962,WBGENE00004966,WBGENE00006625,WBGENE00006734,WBGENE00007169,WBGENE00007337,WBGENE00007385,WBGENE00007386,WBGENE00007390,WBGENE00007735,WBGENE00008224,WBGENE00008530,WBGENE00009012,WBGENE00009342,WBGENE00010046,WBGENE00010544,WBGENE00010547,WBGENE00010665,WBGENE00011953,WBGENE00012401,WBGENE00012402,WBGENE000…
TF	Factor: blmp-1; motif: RAAAGNGARAR	TF:M07150	0.034508	1.46208	1420	3025	271	18840	WBGENE00000102,WBGENE00000112,WBGENE00000160,WBGENE00000183,WBGENE00000248,WBGENE00000257,WBGENE00000266,WBGENE00000379,WBGENE00000410,WBGENE00000464,WBGENE00000770,WBGENE00000837,WBGENE00000982,WBGENE00001034,WBGENE00001153,WBGENE00001229,WBGENE00001232,WBGENE00001239,WBGENE00001259,WBGENE00001424,WBGENE00001584,WBGENE00001597,WBGENE00001632,WBGENE00001645,WBGENE00001678,WBGENE00001683,WBGENE000…
HP	Progressive cerebellar ataxia	HP:0002073	1.07e-18	17.9714	156	642	86	3056	WBGENE00000231,WBGENE00001155,WBGENE00001167,WBGENE00001194,WBGENE00001596,WBGENE00003061,WBGENE00003831,WBGENE00004063,WBGENE00004337,WBGENE00006352,WBGENE00006446,WBGENE00006463,WBGENE00007049,WBGENE00007269,WBGENE00007305,WBGENE00007335,WBGENE00007448,WBGENE00007630,WBGENE00007777,WBGENE00007791,WBGENE00008053,WBGENE00008423,WBGENE00008662,WBGENE00009271,WBGENE00009402,WBGENE00009992,WBGENE000…
HP	Jerky ocular pursuit movements	HP:0008003	1.13e-13	12.9482	68	642	46	3056	WBGENE00007049,WBGENE00007269,WBGENE00007305,WBGENE00007335,WBGENE00007448,WBGENE00007777,WBGENE00007791,WBGENE00008423,WBGENE00008662,WBGENE00009402,WBGENE00010719,WBGENE00010874,WBGENE00012169,WBGENE00012637,WBGENE00013670,WBGENE00013978,WBGENE00014007,WBGENE00015893,WBGENE00016388,WBGENE00016541,WBGENE00016765,WBGENE00016946,WBGENE00016963,WBGENE00017050,WBGENE00017803,WBGENE00018004,WBGENE000…
HP	Basal ganglia gliosis	HP:0006999	2.22e-12	11.6527	74	642	47	3056	WBGENE00006463,WBGENE00007049,WBGENE00007269,WBGENE00007305,WBGENE00007335,WBGENE00007448,WBGENE00007777,WBGENE00007791,WBGENE00008423,WBGENE00008662,WBGENE00009402,WBGENE00010719,WBGENE00010874,WBGENE00011510,WBGENE00012169,WBGENE00012637,WBGENE00013978,WBGENE00014007,WBGENE00015893,WBGENE00016388,WBGENE00016541,WBGENE00016765,WBGENE00016946,WBGENE00016963,WBGENE00017050,WBGENE00017803,WBGENE000…
HP	Vertical nystagmus	HP:0010544	3.23e-12	11.4906	77	642	48	3056	WBGENE00004063,WBGENE00007049,WBGENE00007269,WBGENE00007305,WBGENE00007335,WBGENE00007448,WBGENE00007777,WBGENE00007791,WBGENE00008423,WBGENE00008662,WBGENE00009402,WBGENE00010719,WBGENE00010874,WBGENE00011240,WBGENE00012169,WBGENE00012637,WBGENE00013978,WBGENE00014007,WBGENE00015893,WBGENE00016388,WBGENE00016541,WBGENE00016765,WBGENE00016946,WBGENE00016963,WBGENE00017050,WBGENE00017803,WBGENE000…
HP	Congenital contracture	HP:0002803	5.8e-12	11.2368	247	642	104	3056	WBGENE00000544,WBGENE00001405,WBGENE00003060,WBGENE00003870,WBGENE00004899,WBGENE00004975,WBGENE00005153,WBGENE00006661,WBGENE00007049,WBGENE00007269,WBGENE00007305,WBGENE00007335,WBGENE00007354,WBGENE00007448,WBGENE00007699,WBGENE00007700,WBGENE00007763,WBGENE00007777,WBGENE00007791,WBGENE00007912,WBGENE00008124,WBGENE00008423,WBGENE00008662,WBGENE00008665,WBGENE00008780,WBGENE00009054,WBGENE000…
HP	Neuronal loss in basal ganglia	HP:0200147	7.1e-12	11.1488	73	642	46	3056	WBGENE00006463,WBGENE00007049,WBGENE00007269,WBGENE00007305,WBGENE00007335,WBGENE00007448,WBGENE00007777,WBGENE00007791,WBGENE00008423,WBGENE00008662,WBGENE00009402,WBGENE00010719,WBGENE00010874,WBGENE00012169,WBGENE00012637,WBGENE00013978,WBGENE00014007,WBGENE00015893,WBGENE00016388,WBGENE00016541,WBGENE00016765,WBGENE00016946,WBGENE00016963,WBGENE00017050,WBGENE00017803,WBGENE00018004,WBGENE000…
HP	Hypoplasia of the ventral pons	HP:0006850	1.05e-11	10.9807	71	642	45	3056	WBGENE00007049,WBGENE00007269,WBGENE00007305,WBGENE00007335,WBGENE00007448,WBGENE00007777,WBGENE00007791,WBGENE00008423,WBGENE00008662,WBGENE00009402,WBGENE00010719,WBGENE00010874,WBGENE00012169,WBGENE00012637,WBGENE00013978,WBGENE00014007,WBGENE00015893,WBGENE00016388,WBGENE00016541,WBGENE00016765,WBGENE00016946,WBGENE00016963,WBGENE00017050,WBGENE00017803,WBGENE00018004,WBGENE00018122,WBGENE000…
HP	Abnormal anterior horn cell morphology	HP:0006802	1.84e-11	10.7354	82	642	49	3056	WBGENE00001016,WBGENE00001017,WBGENE00006446,WBGENE00006565,WBGENE00007049,WBGENE00007269,WBGENE00007305,WBGENE00007335,WBGENE00007448,WBGENE00007777,WBGENE00007791,WBGENE00008423,WBGENE00008662,WBGENE00009402,WBGENE00010719,WBGENE00010874,WBGENE00012169,WBGENE00012637,WBGENE00013978,WBGENE00014007,WBGENE00015893,WBGENE00016388,WBGENE00016541,WBGENE00016765,WBGENE00016946,WBGENE00016963,WBGENE000…
HP	Degeneration of anterior horn cells	HP:0002398	1.84e-11	10.7354	82	642	49	3056	WBGENE00001016,WBGENE00001017,WBGENE00006446,WBGENE00006565,WBGENE00007049,WBGENE00007269,WBGENE00007305,WBGENE00007335,WBGENE00007448,WBGENE00007777,WBGENE00007791,WBGENE00008423,WBGENE00008662,WBGENE00009402,WBGENE00010719,WBGENE00010874,WBGENE00012169,WBGENE00012637,WBGENE00013978,WBGENE00014007,WBGENE00015893,WBGENE00016388,WBGENE00016541,WBGENE00016765,WBGENE00016946,WBGENE00016963,WBGENE000…
HP	Dystonia	HP:0001332	1.61e-10	9.79398	600	642	195	3056	WBGENE00000063,WBGENE00000064,WBGENE00000065,WBGENE00000114,WBGENE00000198,WBGENE00000231,WBGENE00000270,WBGENE00000419,WBGENE00000464,WBGENE00000500,WBGENE00000800,WBGENE00000962,WBGENE00001016,WBGENE00001017,WBGENE00001020,WBGENE00001026,WBGENE00001029,WBGENE00001046,WBGENE00001090,WBGENE00001155,WBGENE00001194,WBGENE00001333,WBGENE00001488,WBGENE00001491,WBGENE00001678,WBGENE00001973,WBGENE000…
HP	Spinal muscular atrophy	HP:0007269	1.39e-09	8.85638	103	642	54	3056	WBGENE00000962,WBGENE00001019,WBGENE00004063,WBGENE00006661,WBGENE00007049,WBGENE00007269,WBGENE00007305,WBGENE00007335,WBGENE00007448,WBGENE00007630,WBGENE00007777,WBGENE00007791,WBGENE00008423,WBGENE00008662,WBGENE00009402,WBGENE00010254,WBGENE00010719,WBGENE00010874,WBGENE00012169,WBGENE00012637,WBGENE00013978,WBGENE00014007,WBGENE00015893,WBGENE00016388,WBGENE00016541,WBGENE00016765,WBGENE000…
HP	Abnormality of ocular smooth pursuit	HP:0000617	1.61e-09	8.79404	112	642	57	3056	WBGENE00000231,WBGENE00000500,WBGENE00001016,WBGENE00001167,WBGENE00001194,WBGENE00004063,WBGENE00004337,WBGENE00006446,WBGENE00007049,WBGENE00007269,WBGENE00007305,WBGENE00007335,WBGENE00007448,WBGENE00007777,WBGENE00007791,WBGENE00008423,WBGENE00008662,WBGENE00009402,WBGENE00010719,WBGENE00010874,WBGENE00011240,WBGENE00012169,WBGENE00012337,WBGENE00012637,WBGENE00013670,WBGENE00013978,WBGENE000…
HP	Trigonocephaly	HP:0000243	4.11e-09	8.38588	49	642	33	3056	WBGENE00000063,WBGENE00000064,WBGENE00000065,WBGENE00003020,WBGENE00004208,WBGENE00007354,WBGENE00007699,WBGENE00007700,WBGENE00007763,WBGENE00007824,WBGENE00008124,WBGENE00009054,WBGENE00009079,WBGENE00009101,WBGENE00009893,WBGENE00010265,WBGENE00011133,WBGENE00012008,WBGENE00012741,WBGENE00013476,WBGENE00016010,WBGENE00016081,WBGENE00016200,WBGENE00017699,WBGENE00017817,WBGENE00018359,WBGENE000…
HP	EMG: neuropathic changes	HP:0003445	4.26e-09	8.37097	120	642	59	3056	WBGENE00000962,WBGENE00001371,WBGENE00001509,WBGENE00004063,WBGENE00007049,WBGENE00007269,WBGENE00007305,WBGENE00007335,WBGENE00007448,WBGENE00007630,WBGENE00007777,WBGENE00007791,WBGENE00008053,WBGENE00008423,WBGENE00008662,WBGENE00009002,WBGENE00009402,WBGENE00009563,WBGENE00010254,WBGENE00010719,WBGENE00010874,WBGENE00011240,WBGENE00011629,WBGENE00012169,WBGENE00012543,WBGENE00012637,WBGENE000…
HP	Abnormal reflex	HP:0031826	5.36e-09	8.27085	1087	642	304	3056	WBGENE00000019,WBGENE00000020,WBGENE00000023,WBGENE00000041,WBGENE00000112,WBGENE00000231,WBGENE00000270,WBGENE00000419,WBGENE00000500,WBGENE00000544,WBGENE00000800,WBGENE00000962,WBGENE00001016,WBGENE00001017,WBGENE00001019,WBGENE00001020,WBGENE00001026,WBGENE00001029,WBGENE00001046,WBGENE00001094,WBGENE00001155,WBGENE00001167,WBGENE00001194,WBGENE00001371,WBGENE00001443,WBGENE00001502,WBGENE000…
[truncated: 58 more rows]

## Sheet: ERGO-1 26G GO term
source	term_name	term_id	adjusted_p_value	negative_log10_of_adjusted_p_value	term_size	query_size	intersection_size	effective_domain_size	intersections
[truncated: 25 more rows]

## Sheet: RDE-1 22G GO terms
source	term_name	term_id	adjusted_p_value	negative_log10_of_adjusted_p_value	term_size	query_size	intersection_size	effective_domain_size	intersections
[truncated: 99 more rows]

[truncated: 15 more sheets: CSR-1 22G GO terms, C0F12.1VSRA-1 22G GO terms, WAGO-1 22G GO terms, PPW-2 22G GO terms, WAGO-4 22G GO terms, PPW-1 22G GO terms, SAGO-2 22G GO terms, SAGO-1 22G GO terms, HRDE-1 22G GO terms, WAGO-10 22G GO terms, NRDE-3 22G GO terms, ALG-34 Cluster GO terms, ERGO-1 Cluster GO terms, CSR-1 Cluster GO terms, WAGO Cluster GO terms]
