# Supplementary figures and images for: A comprehensive survey of C. elegans argonaute proteins reveals organism-wide gene regulatory networks and functions
Source: eLife journal article supplement (doi:10.7554/elife.83853), 2023-02-15

H

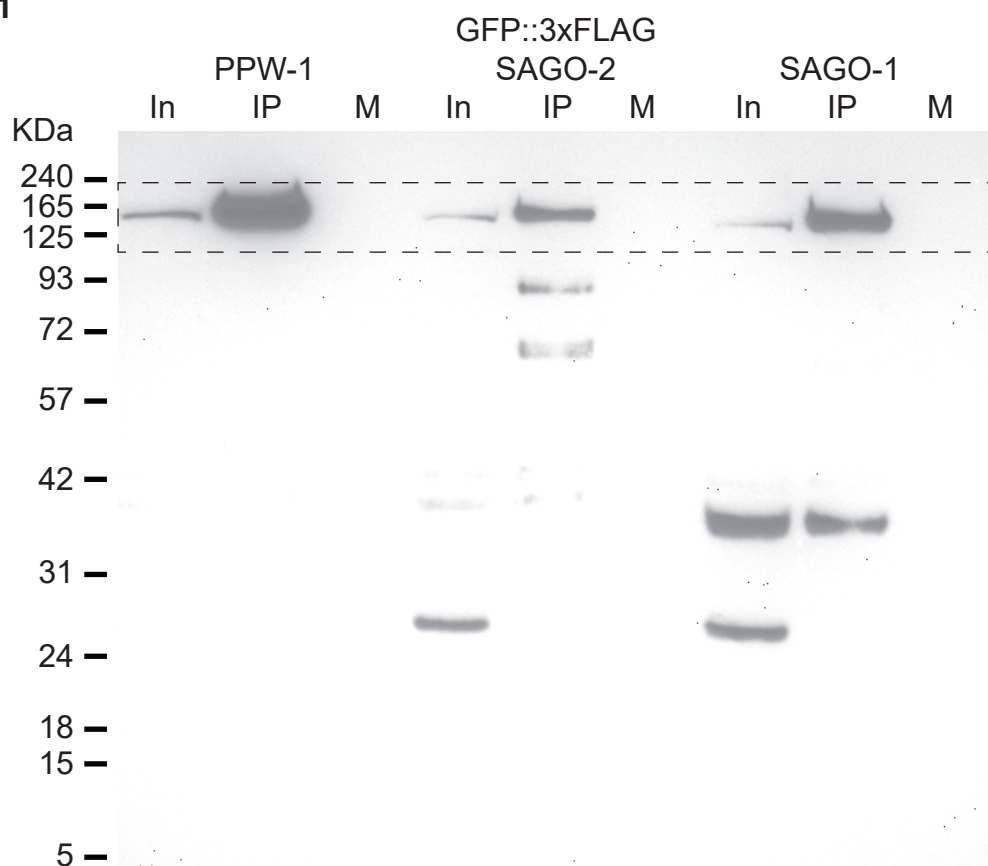

I

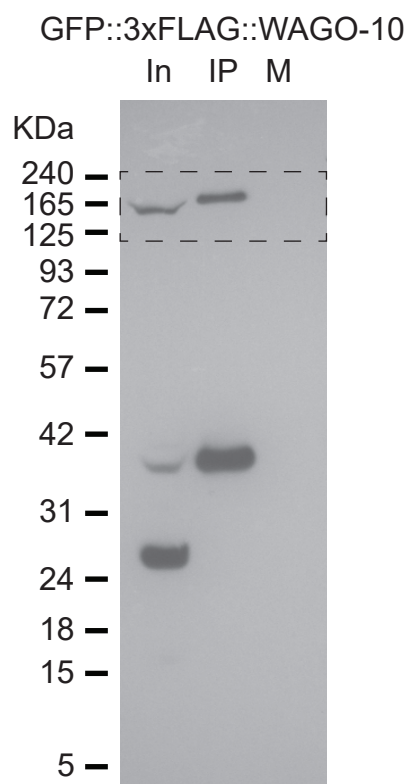

J

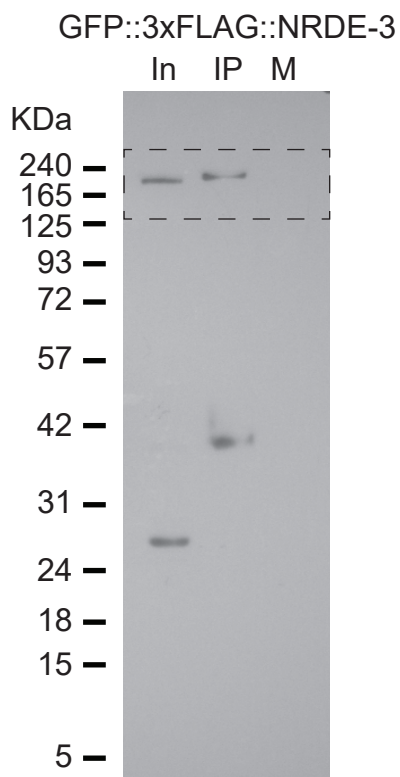

Supplement: fig1-figsupp1-data1 [file elife-83853-fig1-figsupp1-data1-v2.zip]

E

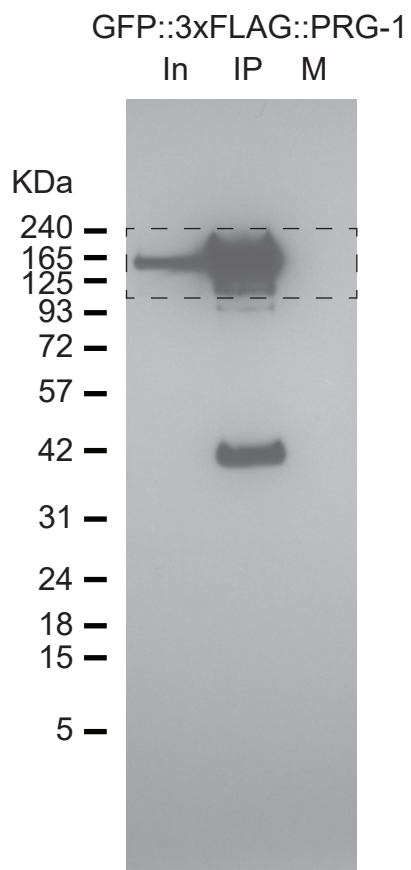

F

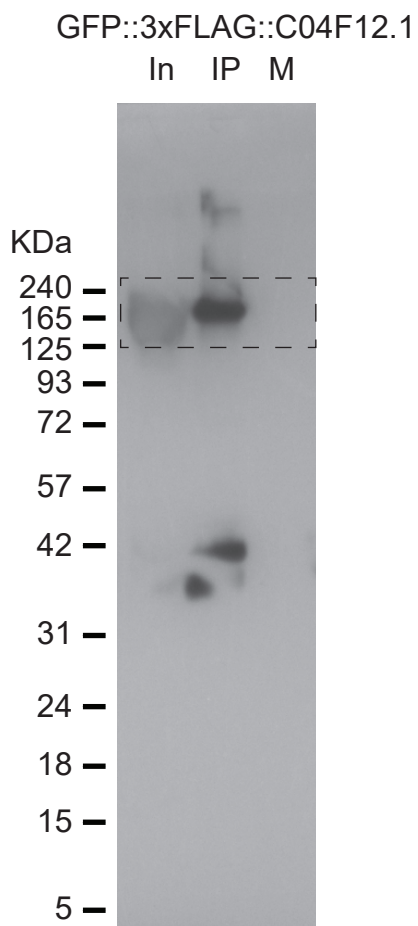

G

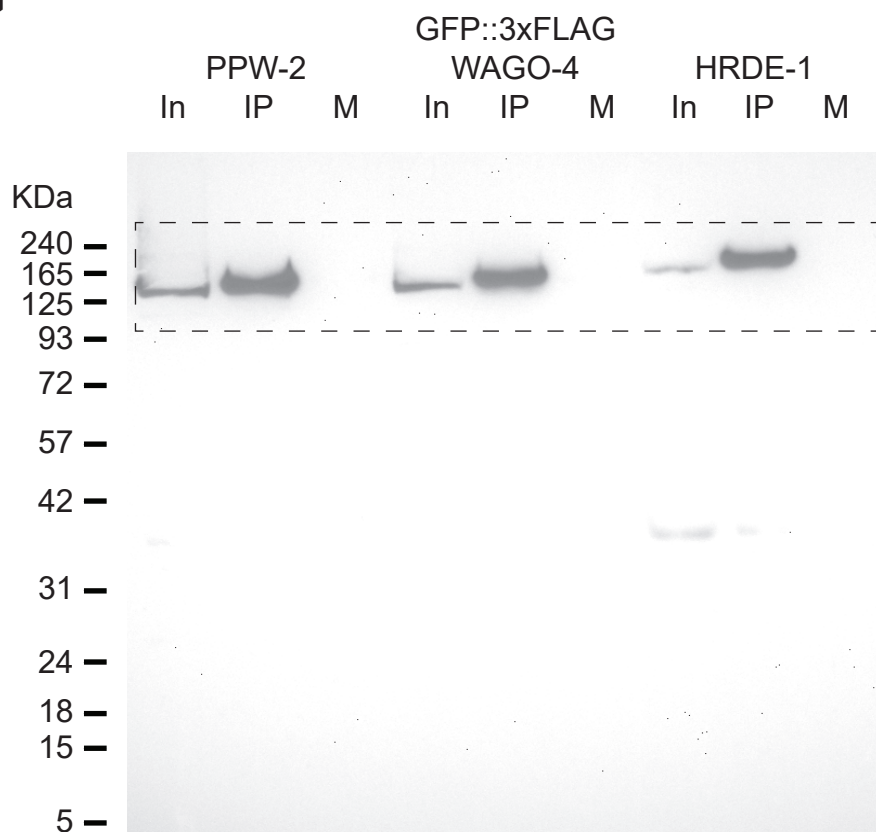

Supplement: fig1-figsupp1-data1 [file elife-83853-fig1-figsupp1-data1-v2.zip]

A

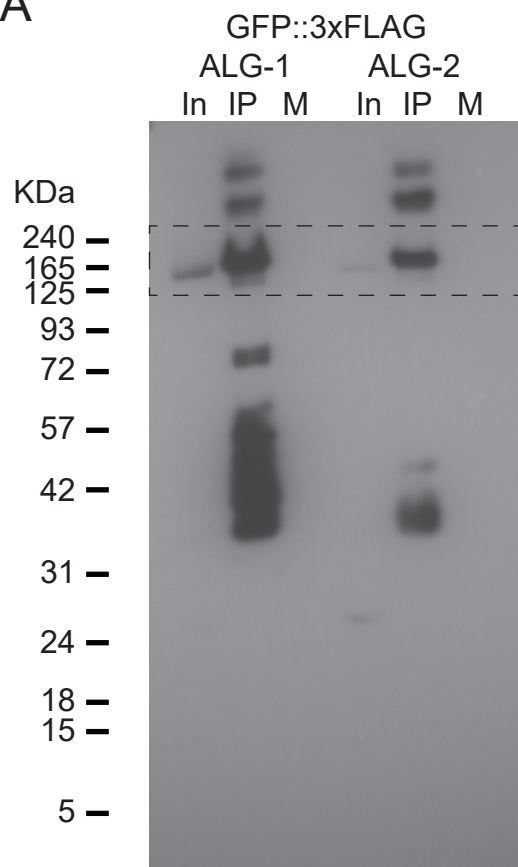

B

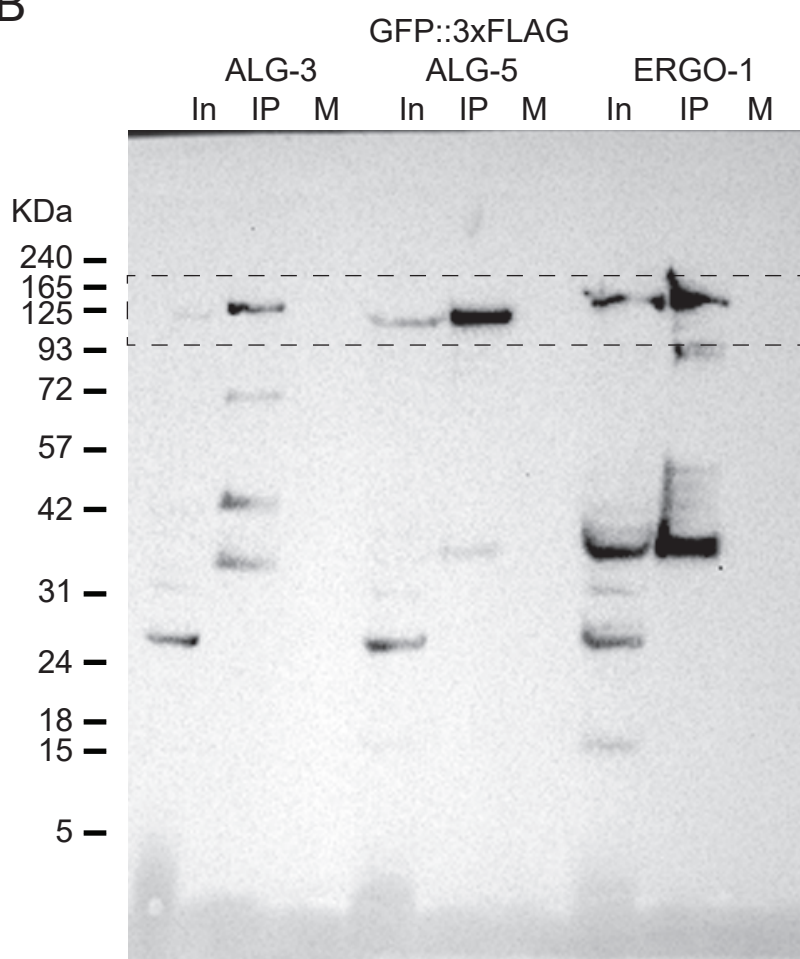

C

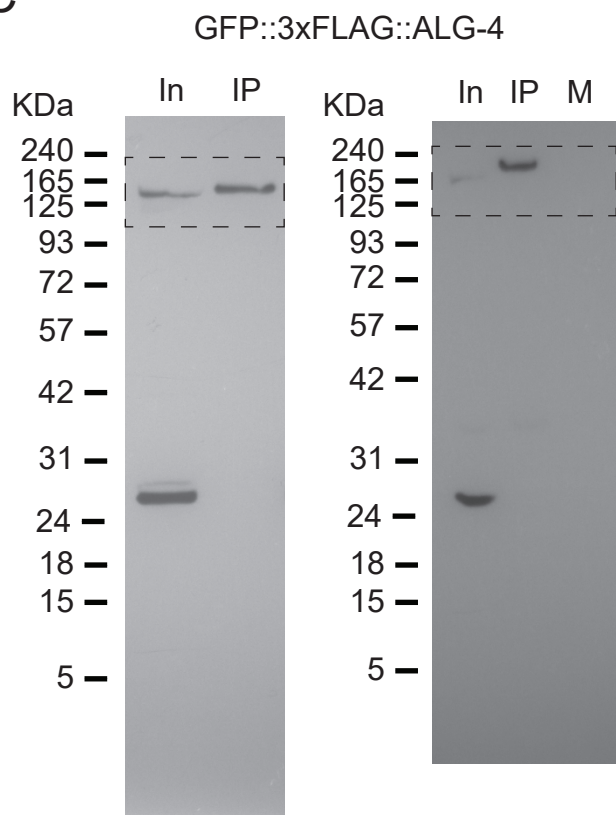

D

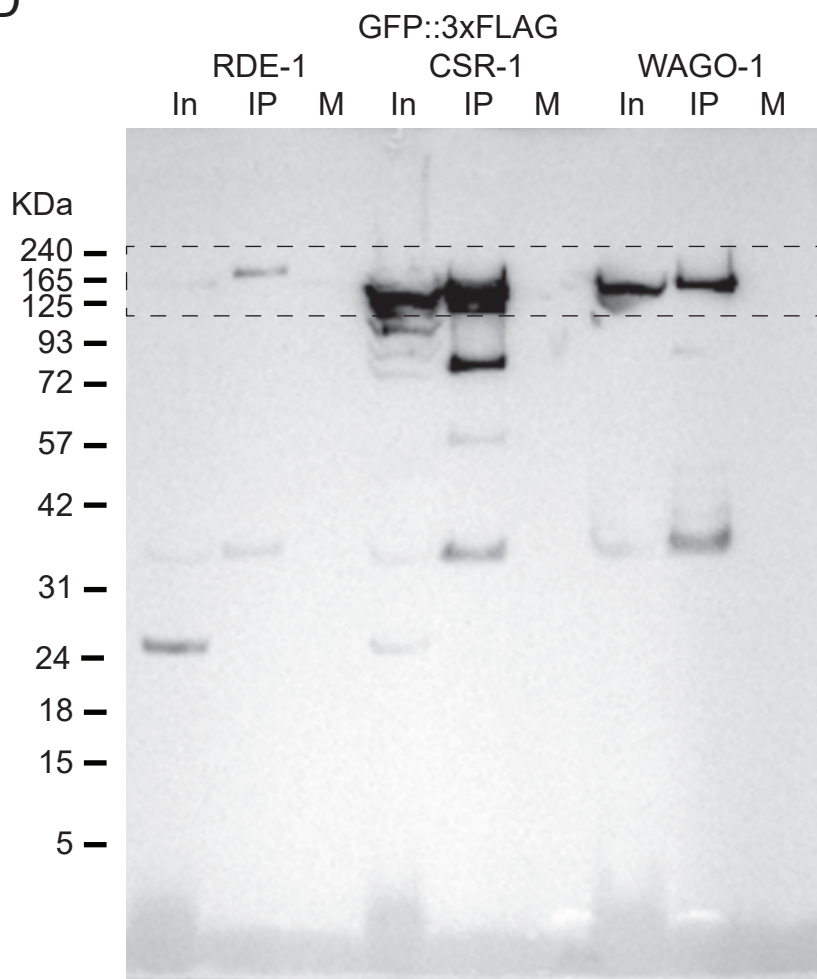

Supplement: fig1-figsupp1-data1 [file elife-83853-fig1-figsupp1-data1-v2.zip]

**A**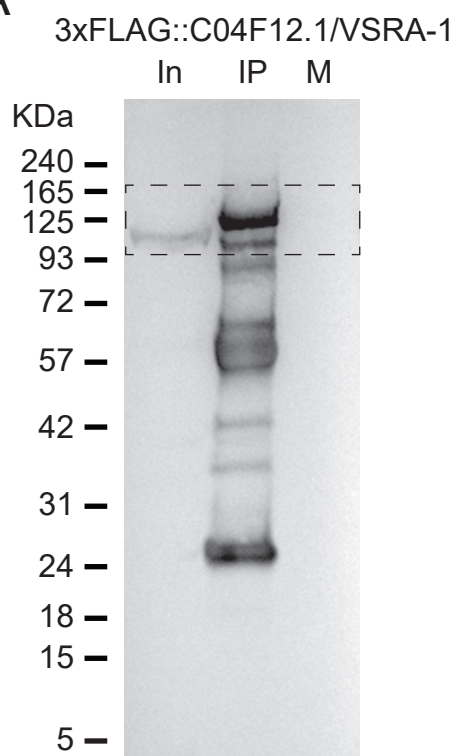**B**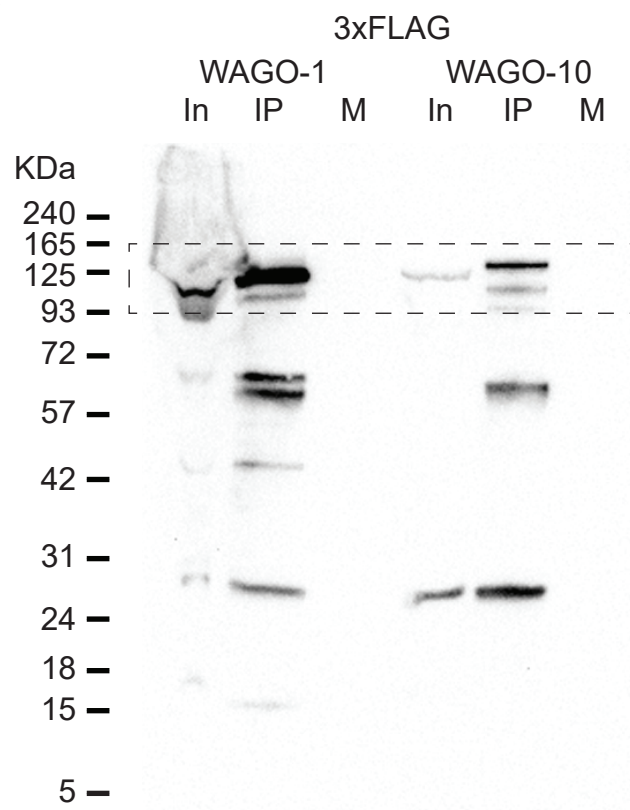**C**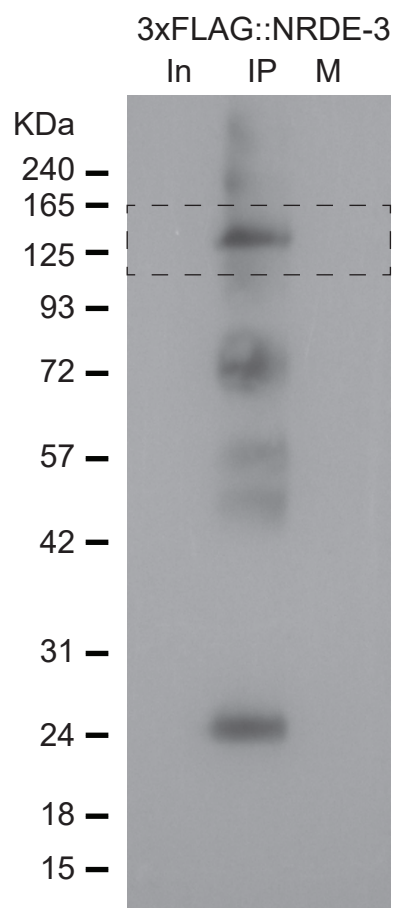

Supplement: fig1-figsupp2-data1 [file elife-83853-fig1-figsupp2-data1-v2.zip]

A

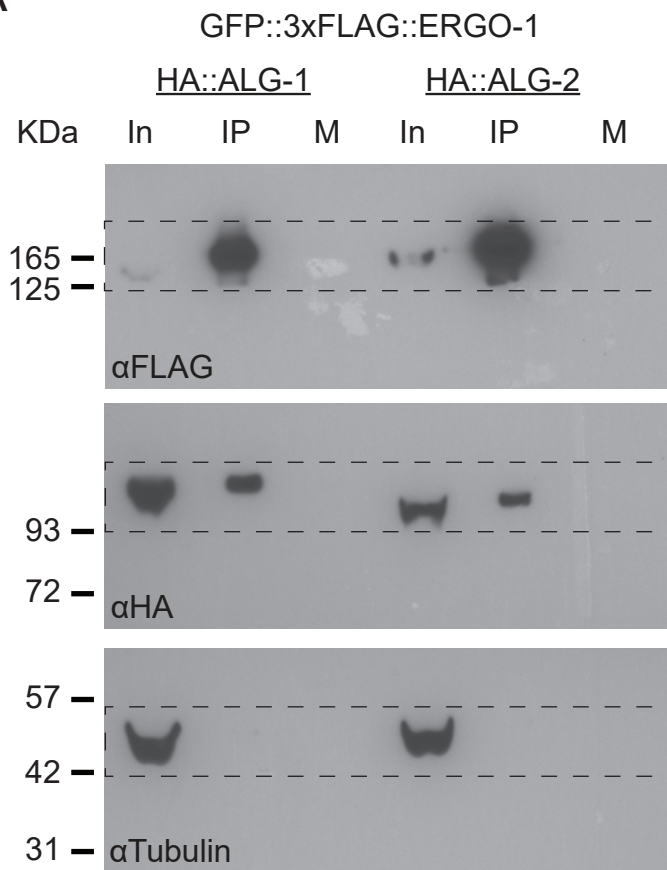

B

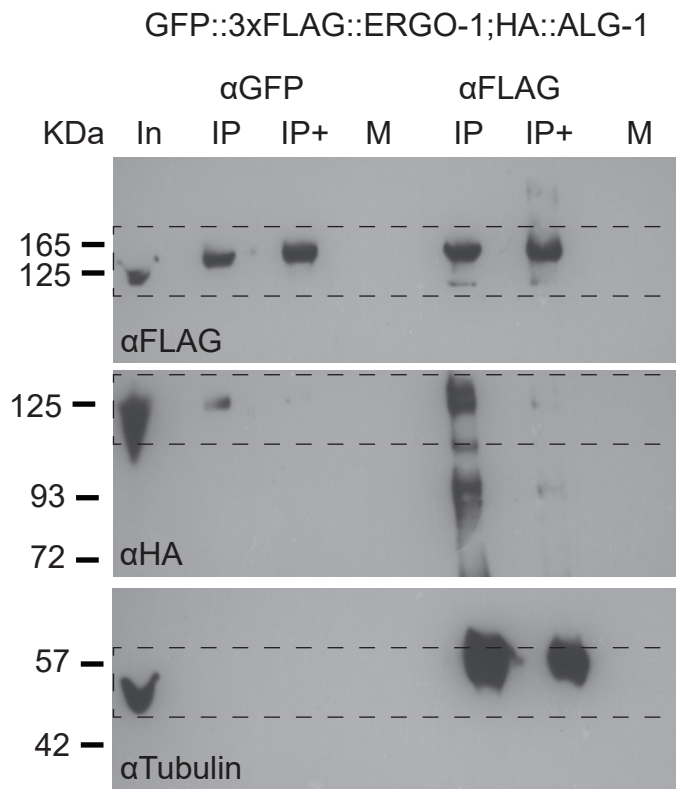

Supplement: fig3-data1 [file elife-83853-fig3-data1-v2.zip]
